# Supplementary material for: Visible-light-driven, catalyst-free intramolecular crossed and straight [2 + 2] cycloaddition
Source: Royal Society of Chemistry journal article supplement (doi:10.1039/d4qo00647j), 2024-01-01
Supplement: d4qo00647j1.pdf [file d4qo00647j1.pdf]

Electronic Supplementary Material (ESI) for Organic Chemistry Frontiers.  
This journal is © The Royal Society of Chemistry 2023

## Supporting Information

### Visible-Light-Driven, Catalyst-Free Intramolecular Crossed and straight [2+2] cycloaddition

Yuan Sang,<sup>‡</sup> Xiaoxuan Zhou,<sup>‡</sup> Chen Jin, Ling Pan, Qun Liu, Haiyan Yuan,<sup>\*</sup> and Yifei Li<sup>\*</sup>

*Jilin Province Key Laboratory of Organic Functional Molecular, Design & Synthesis,  
Department of Chemistry, Northeast Normal University, Changchun 130024, China*

*\*Corresponding author. E-mail: liyf640@nenu.edu.cn, yuanhy034@nenu.edu.cn*

*<sup>‡</sup> These authors contributed equally to this work*

|                                                                      |     |
|----------------------------------------------------------------------|-----|
| 1. General Information.....                                          | 1   |
| 2. Experimental Procedure.....                                       | 3   |
| 3. Details for Condition Optimization.....                           | 4   |
| 4. Mechanistic Investigations.....                                   | 5   |
| 5. DFT calculations.....                                             | 10  |
| 6. X-Ray Structures of Compounds.....                                | 75  |
| 7. Characterization data for the products.....                       | 77  |
| 8. Copies of <sup>1</sup> H NMR and <sup>13</sup> C NMR spectra..... | 109 |
| 9. References .....                                                  | 223 |

## 1. General Information

**Materials:** All solvents were purchased from commercial sources and used without further purification. The photocatalysts was purchased from Aldrich. The starting materials bis(cinnamoyl)ketenedithioacetals **1** were synthesized according to literature report.<sup>1,2</sup>

**Chromatography:** Reactions were monitored by thin-layer chromatography (TLC) carried out on 0.25 mm Tsingdao silica gel plates (GF-254) using UV light as visualizing agent. Tsingdao silica gel (60, particle size 0.040-0.063 mm) was used for flash column chromatography.

**NMR spectra:** NMR spectra were recorded on a Bruker Advance 600 (<sup>1</sup>H: 600 MHz, <sup>13</sup>C: 151 MHz and 126 MHz), at ambient temperature. <sup>1</sup>H NMR spectra were reported in parts per million (ppm) and the spectra are calibrated to the resonance resulting from incomplete deuteration of the solvent (CDCl<sub>3</sub>: 7.26 ppm). <sup>13</sup>C NMR spectra were reported in ppm with the solvent resonance as the internal standard (CDCl<sub>3</sub>: 77.0 ppm, t). The following abbreviations were used to explain the multiplicities: s = singlet, d = doublet, t = triplet, q = quartet, m = multiplet.

**High-resolution mass spectra (HRMS):** All compounds were obtained using a Bruker micro TOF II focusspectrometer (ESI). Measured values are reported to 4 decimal places of the calculated value. The calculated values are based on the most abundant isotope.

**UV/Vis:** UV-vis absorption analysis using Varian Cary50 and Cyclic Voltammetry experiments using CH Instruments (CHI 660E).

**Photoreactor:** The source of the 5w white and blue LED using Wattecs Parallel Light Reactor (white LED Light source, every tube hole groove, 5w). The source of the 40w blue LED ( $\lambda = 456$  nm) was purchased from Kessil (PR160) with flask (15 mL and 75mL) as the irradiation vessel and the Blue LEDs irradiated at the side with a 5-6 cm distance.

### Instruments of Photochemical Reactions

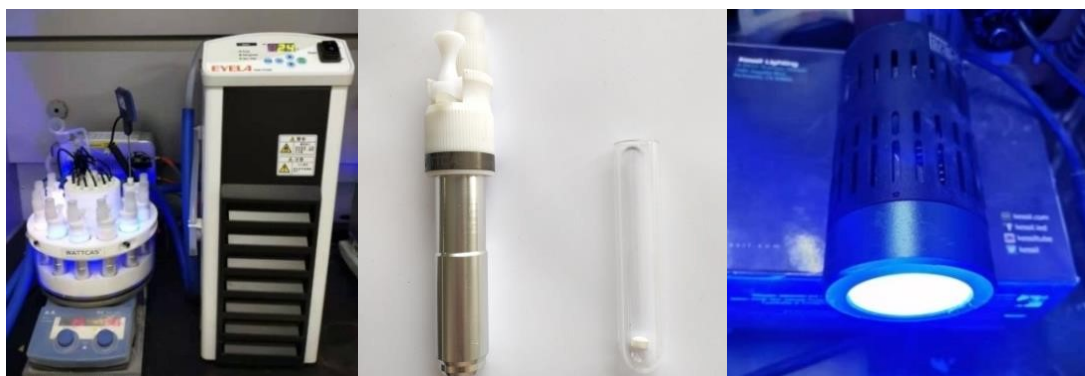

**Figure S1.** Instruments for photochemical reactions (5w white and blue LEDs and 40w blue LED).

# Emission Spectrum

Spectrogram of white light (10W, 6000-6500K)

| Parameter           |               |                         |               |                   |             |      |       |
|---------------------|---------------|-------------------------|---------------|-------------------|-------------|------|-------|
| Name                | Value         | Name                    | Value         | Name              | Value       | Name | Value |
| FlickerFrequency Hz | 324.42        | CIE u',v'               | 0.2017,0.4775 | CIE1931 Y         | 5753834.500 |      |       |
| FluctuateDepth(%)   | 5.8           | Duv y0,dy               | 0.0000,0.0000 | CIE1931 Z         | 5558575.500 |      |       |
| BinkPercent(%)      | 3.0           | SDCM                    | 9.91          | TLCI-2012         | 61          |      |       |
| BinkExponent        | 0.02          | Ra                      | 80.7          | Integral Time(ms) | 0           |      |       |
| EffectiveLux(lx)    | 0.0           | Ee(mW/cm <sup>2</sup> ) | 1212.417      | Peak Signal       | 62923       |      |       |
| PeakLux(lx)         | 0.0           | S/P                     | 2.075         | Dark Signal       | 2055        |      |       |
| LuxIntgarl(lx.s)    | 0.0           | Dominant(nm)            | 509.80        | Compensate level  | 2856        |      |       |
| FlashTime(us)       | 0             | Purity(%)               | 2.3           |                   |             |      |       |
| E(lx)               | 3929869.25    | HalfWidth(nm)           | 21.3          |                   |             |      |       |
| Candle E(fc)        | 365093.75     | Peak(nm)                | 449.3         |                   |             |      |       |
| CCT(K)              | 5792          | Center(nm)              | 450.1         |                   |             |      |       |
| Duv                 | 0.00387       | Centroid(nm)            | 541.9         |                   |             |      |       |
| CIE x,y             | 0.3259,0.3429 | Color Ratio(RGB)        | 13.9,82.8,3.2 |                   |             |      |       |
| CIE u,v             | 0.2017,0.3183 | CIE1931 X               | 5469296.000   |                   |             |      |       |

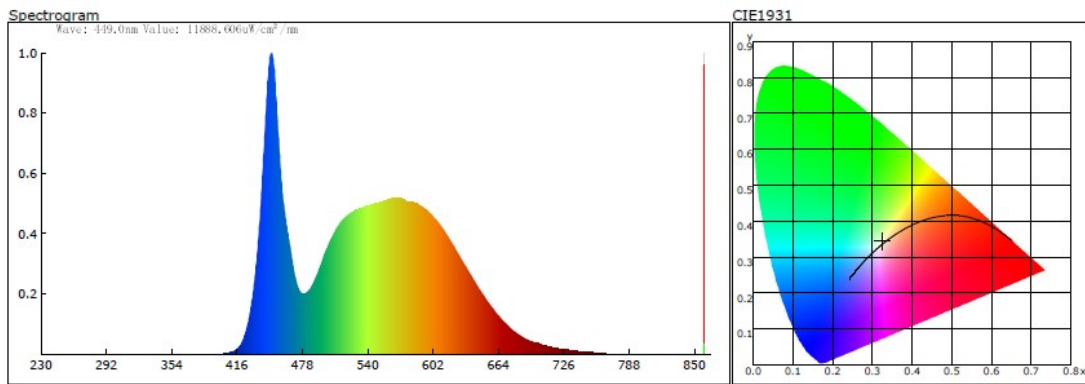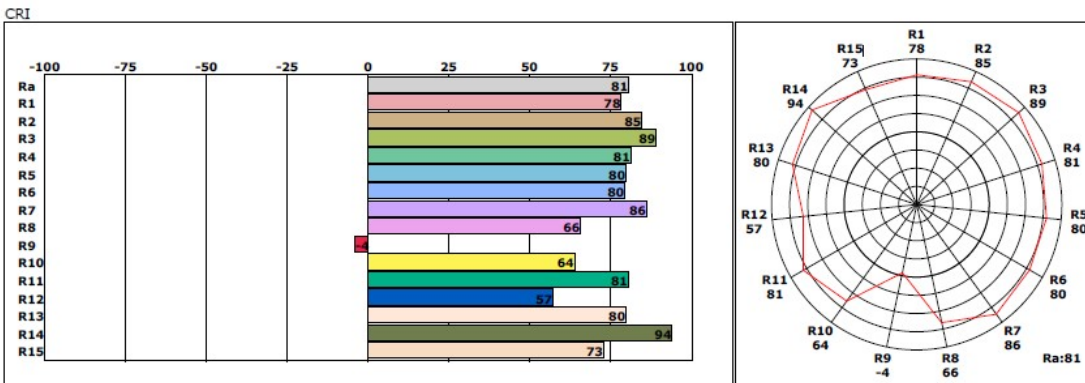

Instrument Status  
 Type: PCS230850      SN: 0      Scan Range: 230-850nm  
 Integral Time: 0.413ms      VPeak: 62923      VDark: 2055

## 2. Experimental Procedure

### 2.1 Typical Procedures for Visible-Light-Induced [2+2] cycloaddition

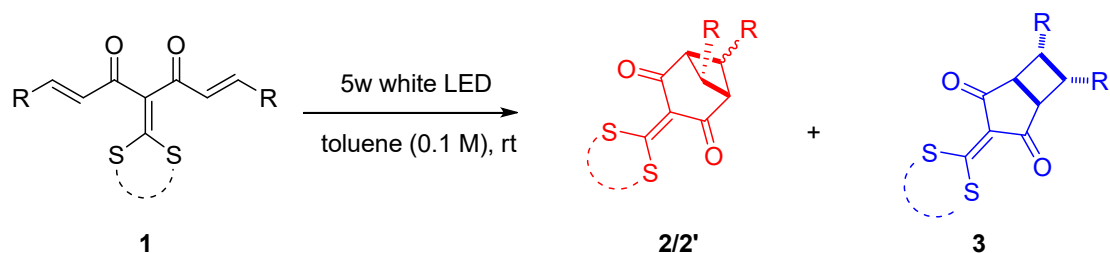

**General synthetic procedure** (with **2a/2a'**, **3a** as an example): To a 15 mL flask equipped with a stir-bar was added bis(cinnamoyl)ketenedithioacetals **1a** (113.4 mg, 0.3 mmol) and 3 mL toluene. The reaction mixture was stirred for about 2 h at Wattecs Parallel Light Reactor (White LED Light source, every tube hole groove, 5 w) at ambient temperature. After the completion of the reaction as indicated by TLC, the mixture was concentrated by rotary evaporation, then purified by silica gel flash column chromatography (PE/EA = 2/1) to afford mixed crossed products **2a/2a'** (yellow solid, 56.7 mg, 50%) and straight product **3a** (yellow solid, 42.0 mg, 37%).

### 2.2 Gram-scale reaction

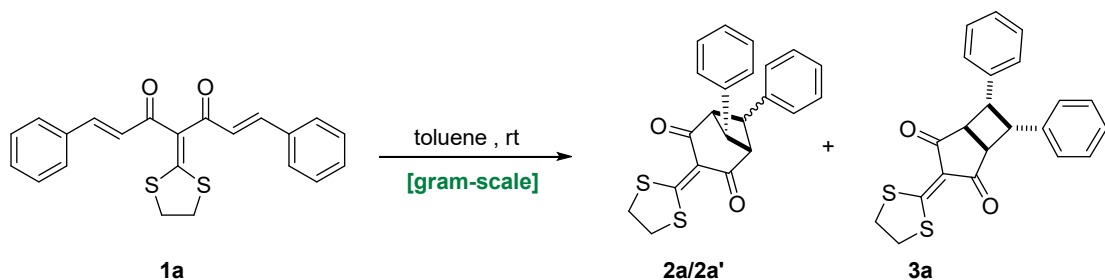

### Synthetic procedure of white LEDs irradiation:

To a 75 mL flask equipped with a stir-bar was added bis(cinnamoyl)ketenedithioacetals **1a** (3 g, 7.9 mmol) and 70 mL toluene. The reaction mixture was stirred for about 30 h under the irradiation of white LED light (10 w) at ambient temperature in a Wattecs Parallel Light Reactor. After the completion of the reaction as indicated by TLC, the solution was concentrated *in vacuo* and then purified by silica gel flash column chromatography (PE/EA = 2/1) to afford **2a/2a'** (1.85 g, 36%) and **3a** (1.70 g, 33%).

### 2.3 Synthetic procedure of sunlight

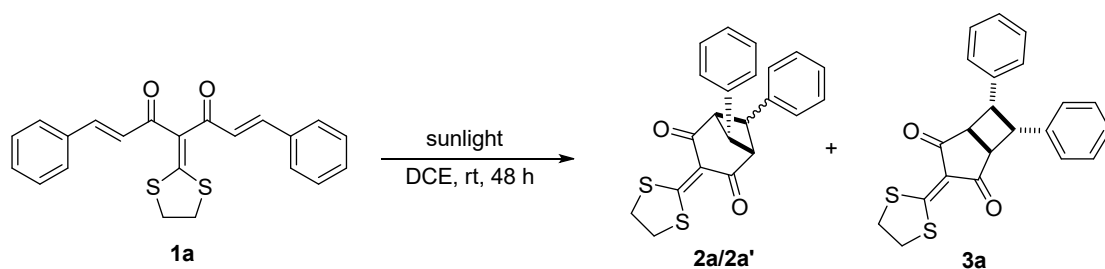

To a 15 mL flask was added bis(cinnamoyl)ketenedithioacetals **1a** (113.4 mg, 0.3 mmol) and 3 mL DCE. The reaction mixture was exposed to sunlight for about 48 h at ambient temperature. After the completion of the reaction as indicated by TLC, the solution was concentrated *in vacuo* and then purified by silica gel flash column chromatography (PE/EA = 2/1) to afford **2a/2a'** (48.8 mg, 43%) and **3a** (39.7 mg, 35%).

### 3. Details for Condition Optimizations

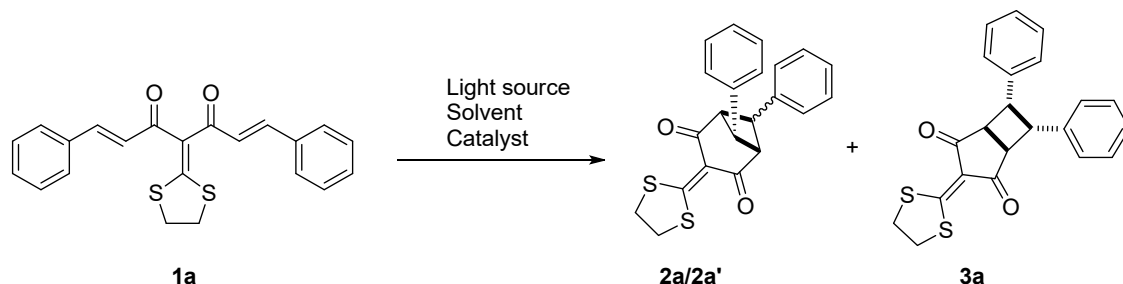

#### 3.1 Optimization of Light Source<sup>a</sup>

| Entry | Light | Wavelength /nm | Temp (°C) | Solvent           | Catalyst | Yield of <b>2a/2a'</b> (%) | Yield of <b>3a</b> (%) |
|-------|-------|----------------|-----------|-------------------|----------|----------------------------|------------------------|
| 1     | 5 W   | 460-465        | rt        | CDCl <sub>3</sub> | -        | 42 (1/0.73)                | 33                     |
| 2     | 40 W  | 460-465        | rt        | CDCl <sub>3</sub> | -        | 44 (1/0.77)                | 38                     |
| 3     | 100 W | 460-465        | rt        | CDCl <sub>3</sub> | -        | 36 (1/0.92)                | 37                     |

<sup>a</sup> Isolated Yields.

#### 3.2 Optimization of Wavelength<sup>a</sup>

| Entry | Light | Wavelength /nm | Temp (°C) | Solvent           | Catalyst | Yield of <b>2a/2a'</b> (%) | Yield of <b>3a</b> (%) |
|-------|-------|----------------|-----------|-------------------|----------|----------------------------|------------------------|
| 1     | 5 W   | 435-440        | rt        | CDCl <sub>3</sub> | -        | 40 (1/0.78)                | 37                     |
| 2     | 5 W   | 460-465        | rt        | CDCl <sub>3</sub> | -        | 42 (1/0.73)                | 33                     |
| 3     | 5 W   | 490-495        | rt        | CDCl <sub>3</sub> | -        | 37 (1/0.90)                | 38                     |
| 4     | 5 W   | 525-530        | rt        | CDCl <sub>3</sub> | -        | not finished               |                        |
| 5     | 5 W   | 585-590        | rt        | CDCl <sub>3</sub> | -        | N.R.                       |                        |
| 6     | 5 W   | white          | rt        | CDCl <sub>3</sub> | -        | 45 (1/0.61)                | 37                     |

<sup>a</sup> Isolated Yields.

#### 3.3 Optimization of Temperature<sup>a</sup>

| Entry | Light | Wavelength /nm | Temp (°C) | Solvent           | Catalyst | Yield of <b>2a/2a'</b> (%) | Yield of <b>3a</b> (%) |
|-------|-------|----------------|-----------|-------------------|----------|----------------------------|------------------------|
| 1     | 40 W  | 460-465        | rt        | CDCl <sub>3</sub> | -        | 44 (1/0.77)                | 38                     |
| 2     | 40 W  | 460-465        | 40        | CDCl <sub>3</sub> | -        | 45 (1/0.60)                | 40                     |

<sup>a</sup> Isolated Yields.

### 3.4 Optimization of Solvent<sup>a</sup>

| Entry | Light | Wavelength<br>/nm | Temp<br>(°C) | Solvent           | Catalyst | Yield of<br><b>2a/2a'</b> (%) | Yield of<br><b>3a</b> (%) |
|-------|-------|-------------------|--------------|-------------------|----------|-------------------------------|---------------------------|
| 1     | 5 W   | white             | rt           | CDCl <sub>3</sub> | -        | 45 (1/0.61)                   | 37                        |
| 2     | 5 W   | white             | rt           | DCM               | -        | 35 (1/0.63)                   | 35                        |
| 3     | 5 W   | white             | rt           | EtOAc             | -        | 28 (1/0.59)                   | 35                        |
| 4     | 5 W   | white             | rt           | MeCN              | -        | 33 (1/0.47)                   | 33                        |
| 5     | 5 W   | white             | rt           | Toluene           | -        | 50 (1/0.53)                   | 37                        |
| 6     | 5 W   | white             | rt           | 1,4-dioxane       | -        | 37 (1/0.58)                   | 41                        |
| 7     | 5 W   | white             | rt           | MeNO <sub>2</sub> | -        | 39 (1/0.40)                   | 40                        |

<sup>a</sup> Isolated Yields.

### 3.5 Optimization of Catalyst<sup>a</sup>

| Entry | Light | Wavelength/<br>nm | Temp<br>(°C) | Solvent | Catalyst                                            | Yield of<br><b>2a/2a'</b> (%) | Yield of<br><b>3a</b> (%) |
|-------|-------|-------------------|--------------|---------|-----------------------------------------------------|-------------------------------|---------------------------|
| 1     | 5 W   | white             | rt           | Toluene | -                                                   | 50 (1/0.53)                   | 37                        |
| 2     | 5 W   | white             | rt           | Toluene | Acr <sup>+</sup> -Mes ClO <sub>4</sub> <sup>-</sup> | 45 (1/0.79)                   | 36                        |
| 3     | 5 W   | white             | rt           | Toluene | <i>fac</i> -Ir(ppy) <sub>3</sub>                    | 40 (1/0.99)                   | 40                        |
| 4     | 5 W   | white             | rt           | Toluene | Ru(bpy) <sub>3</sub> Cl <sub>2</sub>                | 49 (1/0.89)                   | 37                        |

<sup>a</sup> Isolated Yields.

## 4. Mechanistic Investigations

### 4.1 Radical Trapping Experiment

a)

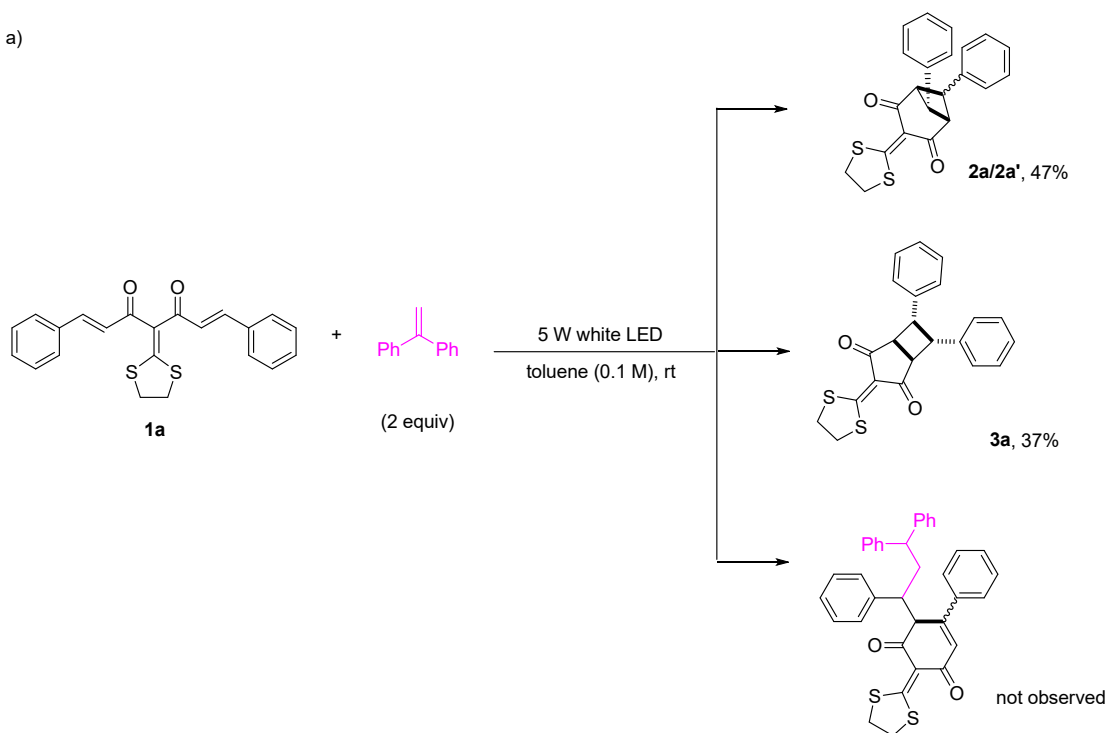

b)

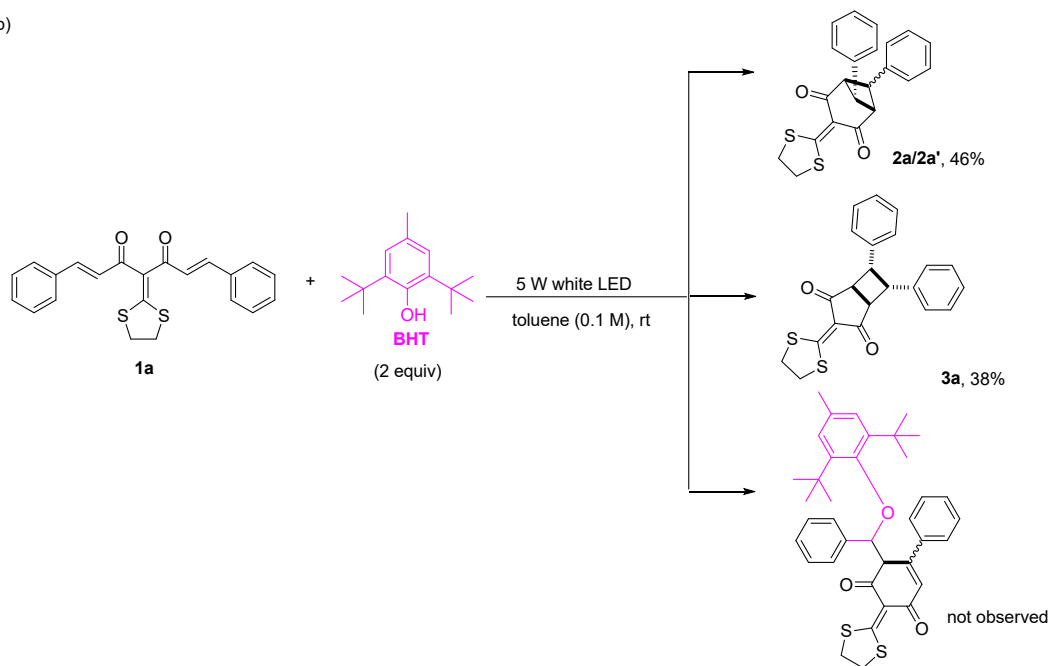

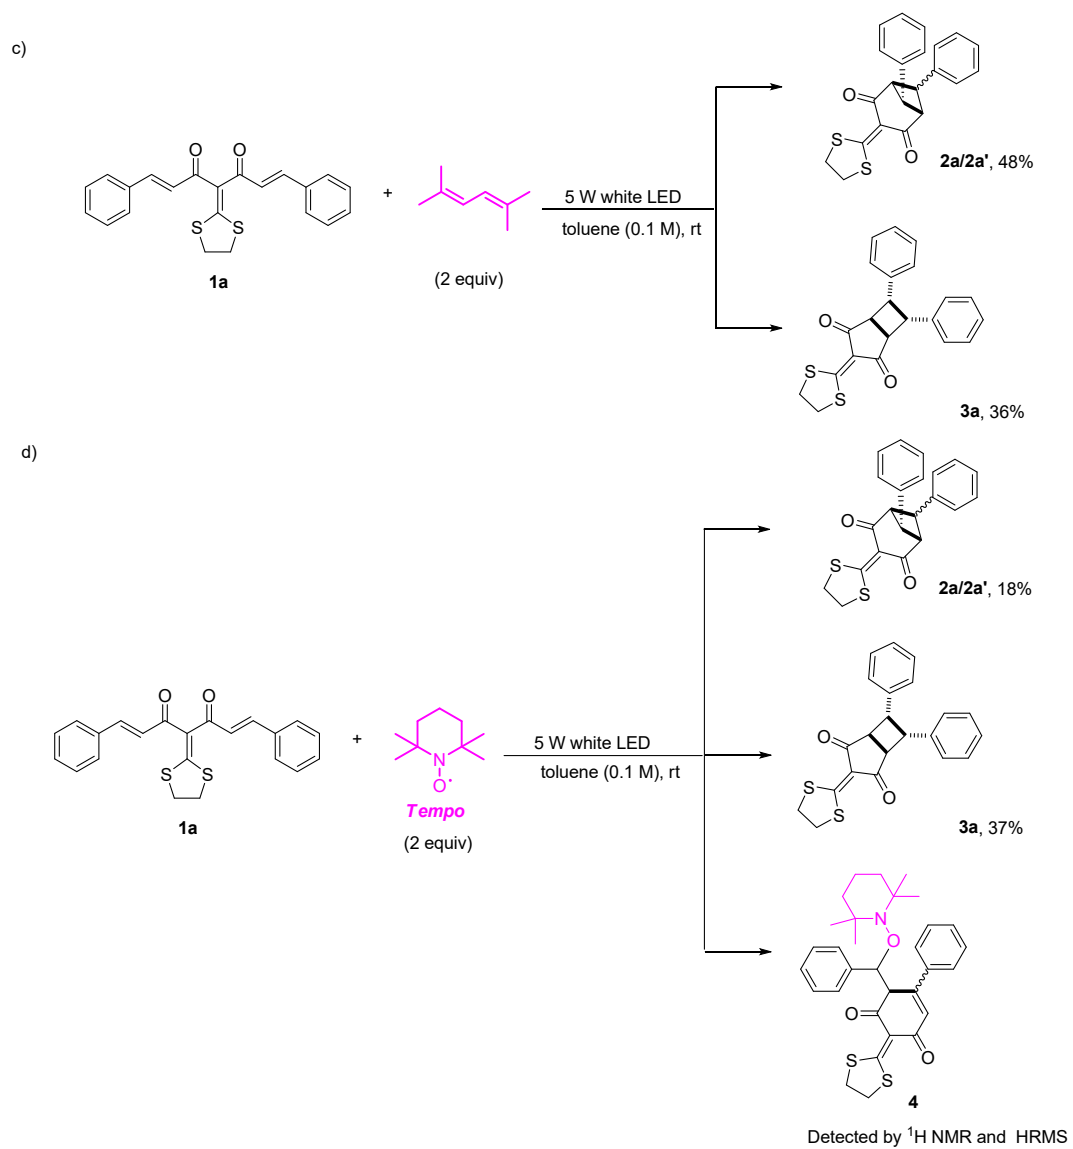

## 4.2 Detection of Intermediate 4

### 4.2.1 $^1\text{H}$ NMR of 4



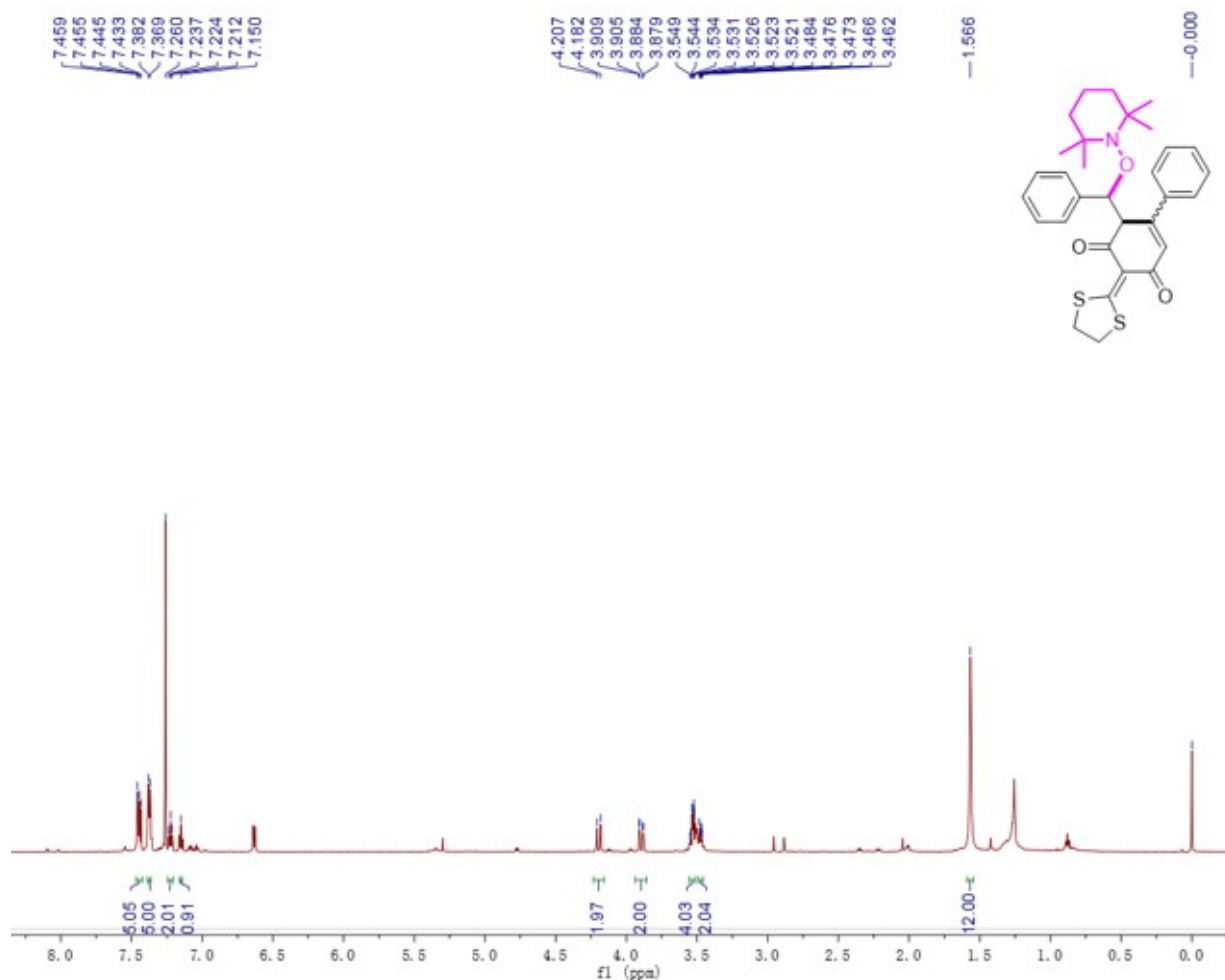

Figure S2.  $^1\text{H}$  NMR of 4

**(*R*)-4-(1,3-dithiolan-2-ylidene)-2-((*S*)-phenyl((2,2,6,6-tetramethylpiperidin-1-yl)oxy)methyl)-[1,1'-biphenyl]-3,5(2*H*,4*H*)-dione 4:**

Yellow oil,  $^1\text{H}$  NMR (600 MHz,  $\text{CDCl}_3$ )  $\delta$  7.46-7.43 (m, 5H), 7.38 (d,  $J = 7.8$  Hz, 5H), 7.22 (t,  $J = 7.8$  Hz, 2H), 7.15 (s, 1H), 4.19 (d,  $J = 15.0$  Hz, 2H), 3.91-3.88 (m, 2H), 3.55-3.52 (m, 4H), 3.48-3.46 (m, 2H), 1.57 (s, 12H). HRMS (ESI,  $m/z$ ): Calculated for

$\text{C}_{31}\text{H}_{35}\text{NO}_3\text{S}_2$   $[\text{M}+\text{H}]^+$  534.2131, found 534.2134.

**4.2.2 HRMS of 4**

**Analysis Info**

Analysis Name D:\Data\user\A2021\Ae195\_38\_01\_15748.d  
Method sample-3min-pos..m  
Sample Name Ae195  
Comment

Acquisition Date 7/26/2021 10:22:39 AM

Operator BDAL@DE  
Instrument / Ser# micrOTOF 213750.10  
328

**Acquisition Parameter**

|             |          |                      |          |                  |           |
|-------------|----------|----------------------|----------|------------------|-----------|
| Source Type | ESI      | Ion Polarity         | Positive | Set Nebulizer    | 1.5 Bar   |
| Focus       | Active   |                      |          | Set Dry Heater   | 180 °C    |
| Scan Begin  | 50 m/z   | Set Capillary        | 4500 V   | Set Dry Gas      | 8.0 l/min |
| Scan End    | 1500 m/z | Set End Plate Offset | -500 V   | Set Divert Valve | Waste     |

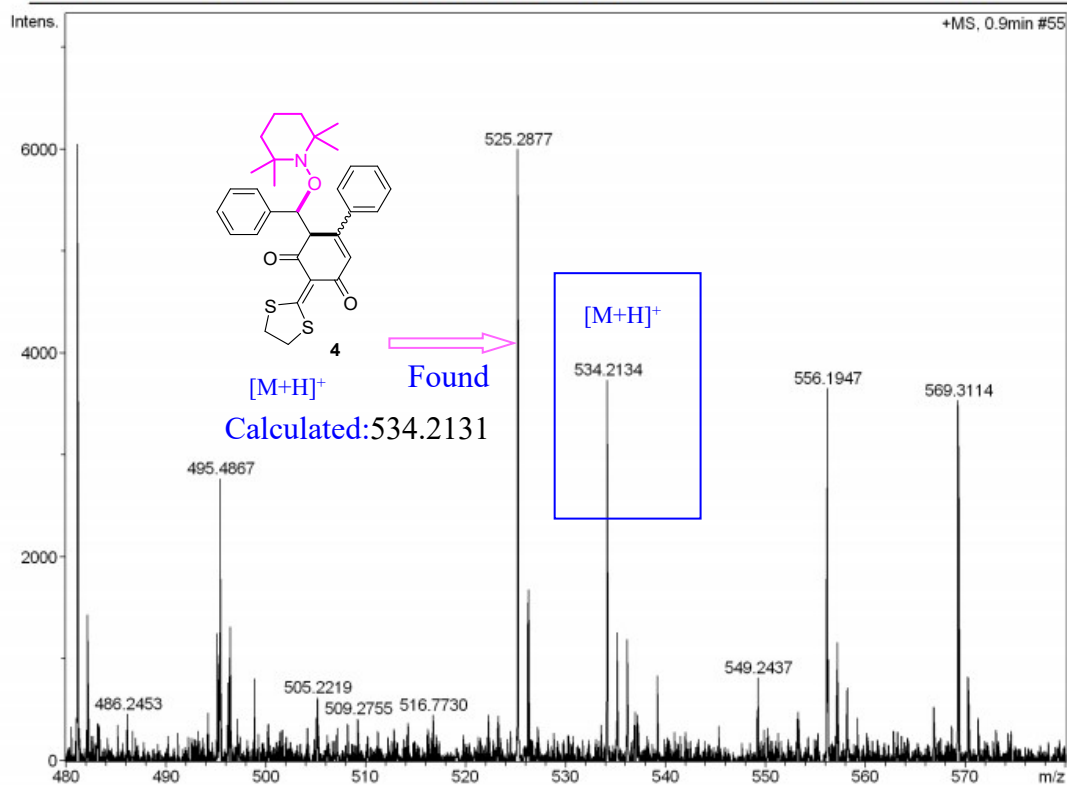

**Figure S3.** HRMS of **4**

### 4.3 UV-vis spectrum

UV-vis absorption of four solutions is reported. As follows: ketenedithioacetals **S1a** ( $2 \times 10^{-5}$  mol,  $2 \times 10^{-4}$  M in DCE); bis(cinnamoyl)ketenedithioacetals **1** ( $2 \times 10^{-5}$  mol,  $2 \times 10^{-4}$  M in DCE) and the other two compounds that cannot go through this cycloaddition reaction.

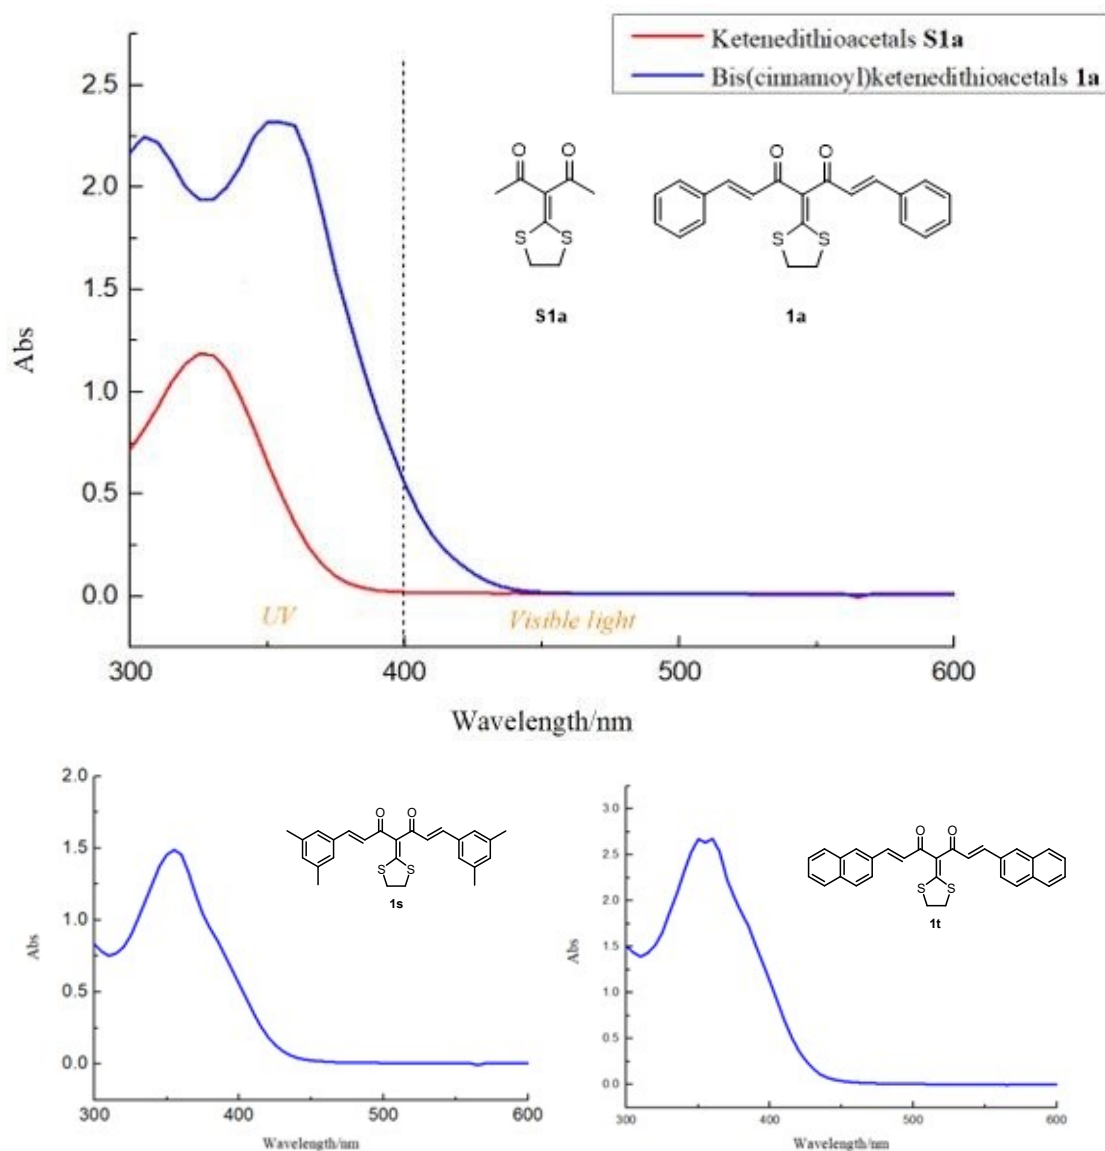

**Figure S4.** UV-vis spectrum of **S1a**, **1a**, **1s** and **1t**

#### 4.4 Cyclic Voltammetry (CV) Experiments

Cyclic voltammetry (CV) studies were performed in a 150 mL glass beaker, for the electrochemical measurements a three-electrode system connected to an electrochemical station was used. All electrochemical measurements were performed in degassed DMF under dry N<sub>2</sub> atmosphere in room temperature. CV spectra of all compounds is reported at 3 mM in 0.1 M NBu<sub>4</sub>PF<sub>6</sub> in degassed DMF with scan rate 100 mV/s. Before the experiment, the glassy carbon electrode was polished with metallographic sandpaper, and then polished to the mirror surface with Al<sub>2</sub>O<sub>3</sub> slurry on the suede.

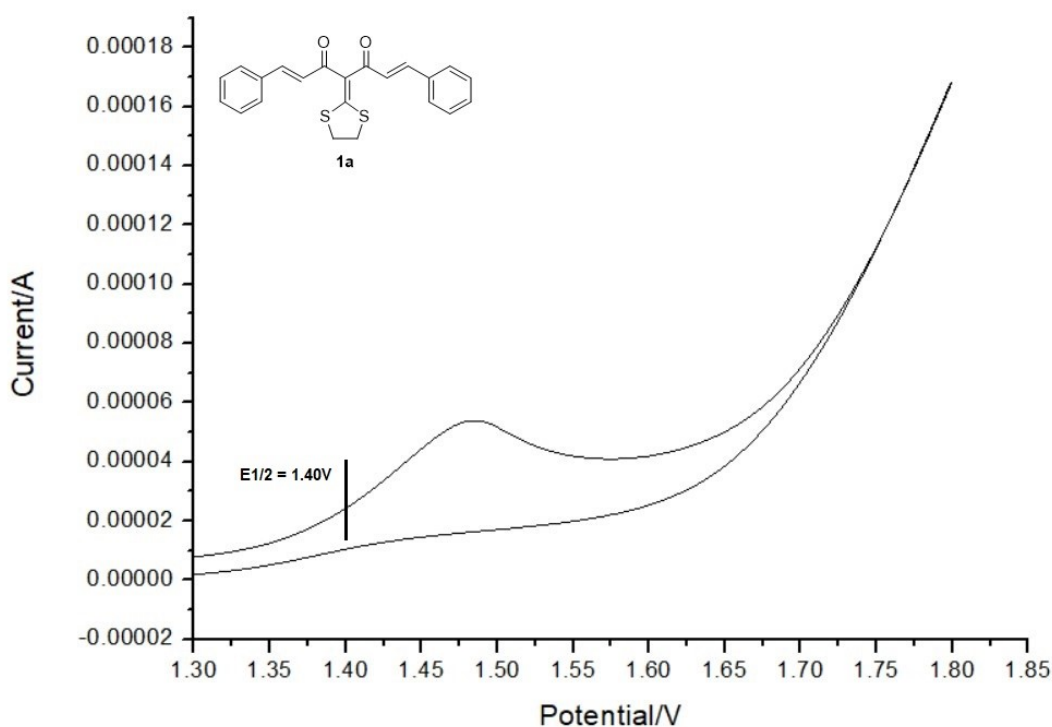

**Figure S5.** Cyclic voltammogram of bis(cinnamoyl)ketenedithioacetals **1a**. Conditions: DMF (10 mL),  $\text{NBu}_4\text{PF}_6$  (0.1 M), bis(cinnamoyl)ketenedithioacetals **1a** (3 mM). The working electrode is glassy carbon electrode (columniform, 3.0 mm in diameter), the counter electrode is Pt wire and the reference electrode is Ag/AgCl in 0.1 M KCl. Starting point of scan is 1.30 V, scan direction is shown in diagram. The CV experiment began with an initial potential of 1.30 V with switching the potential at 1.85 V (oxidative scan). The oxidation potential  $E_{1/2}$  (1.40 V vs. SCE) was converted from internal standard SCE. CV plotting convention (IUPAC).

## 5. DFT calculations

### 5.1 Computational studies of **1a**

All theoretical calculations were performed with Gaussian 09<sup>3</sup>. All structures were completely optimized by using the (U)B3LYP<sup>4</sup> method and the 6-311+g(2d,p) basis set. Frequency calculations were carried out at the same level to confirm all the optimized structures as minima (no imaginary frequency) or transition states (only one imaginary frequency), and provided the thermal relative Gibbs free energy correction. The searching for minimal energy crossing points was conducted using a modified version of Harvey's code<sup>5</sup> (sobMECP<sup>6</sup>) interfaced with Gaussian 09.

#### 5.1.1 Spin density

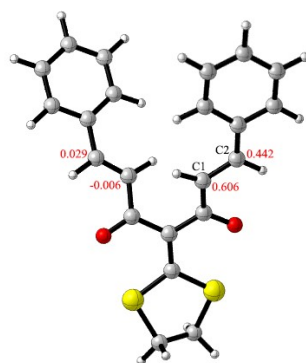

**Figure S6.** The spin density of **1a-T1**.

Furthermore, our theoretical calculations suggest that the spin density in **1a** is mainly localized on C1 and C2.

### 5.1.2 Cartesian coordinates and energies of all optimized structures

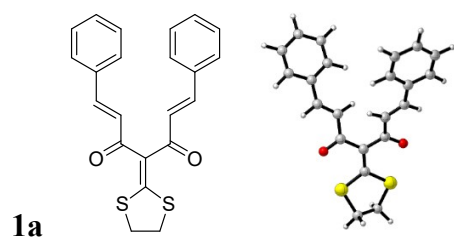

SCF Done: E(UB3LYP) = -1796.31866709 A.U.

Zero-point correction = 0.338302 (Hartree/Particle)

Sum of electronic and thermal Free Energies = -1796.038626

|   |             |             |             |
|---|-------------|-------------|-------------|
| C | 5.83671100  | -0.39845700 | 0.64060200  |
| C | 5.83697800  | 0.39753900  | -0.63966000 |
| C | 3.27733400  | -0.00037500 | 0.00000700  |
| H | 6.60070100  | -1.17750000 | 0.64701800  |
| H | 5.97516000  | 0.24159400  | 1.51351900  |
| H | 5.97573400  | -0.24251400 | -1.51252800 |
| H | 6.60100800  | 1.17654400  | -0.64578000 |
| S | 4.20989800  | -1.24477800 | 0.81292200  |
| S | 4.21028000  | 1.24393400  | -0.81260100 |
| C | 1.88872500  | -0.00032200 | -0.00021800 |
| C | 1.19537900  | 1.23394200  | -0.42069500 |
| C | 1.19514100  | -1.23449600 | 0.42001500  |
| O | 1.78415800  | -2.09422000 | 1.07818200  |
| O | 1.78459400  | 2.09347700  | -1.07890500 |
| C | -0.17662800 | 1.49645600  | 0.08234300  |
| H | -0.58243500 | 0.82616300  | 0.82773300  |
| C | -0.17689100 | -1.49673500 | -0.08309500 |
| H | -0.58243700 | -0.82650300 | -0.82868400 |

|   |             |             |             |
|---|-------------|-------------|-------------|
| C | -0.86392600 | 2.56995200  | -0.33752900 |
| H | -0.37250200 | 3.19902400  | -1.07455200 |
| C | -0.86463000 | -2.56979700 | 0.33716800  |
| H | -0.37359900 | -3.19860700 | 1.07467600  |
| C | -2.19393100 | 3.00046300  | 0.08453600  |
| C | -2.71511900 | 4.18767600  | -0.45058300 |
| C | -2.98268600 | 2.28650600  | 1.00136400  |
| C | -3.97231600 | 4.65023800  | -0.08349900 |
| H | -2.11920400 | 4.75029000  | -1.16042300 |
| C | -4.23767100 | 2.74680100  | 1.36637600  |
| H | -2.61338800 | 1.36303700  | 1.42972600  |
| C | -4.73848000 | 3.93118200  | 0.82687300  |
| H | -4.35351100 | 5.57119800  | -0.50830500 |
| H | -4.83182200 | 2.18145300  | 2.07449100  |
| H | -5.72009400 | 4.28762800  | 1.11535500  |
| C | -2.19476500 | -3.00002000 | -0.08477900 |
| C | -2.71773500 | -4.18508800 | 0.45335400  |
| C | -2.98193900 | -2.28788600 | -1.00438000 |
| C | -3.97524900 | -4.64718300 | 0.08676400  |
| H | -2.12298300 | -4.74636500 | 1.16522300  |
| C | -4.23720800 | -2.74774700 | -1.36896000 |
| H | -2.61108700 | -1.36629800 | -1.43544000 |
| C | -4.73988400 | -3.92988300 | -0.82627400 |
| H | -4.35786100 | -5.56642900 | 0.51400000  |
| H | -4.83009000 | -2.18386100 | -2.07930200 |
| H | -5.72170900 | -4.28599900 | -1.11444300 |

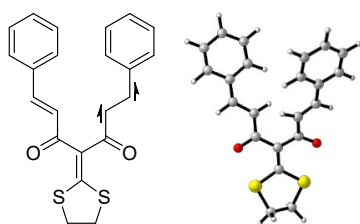

**1a-T1**

SCF Done: E(UB3LYP) = -1796.23675250 A.U.

Zero-point correction = 0.334806 (Hartree/Particle)

Sum of electronic and thermal Free Energies = -1795.961140

|   |             |             |             |
|---|-------------|-------------|-------------|
| C | -5.85990500 | 0.35924800  | 0.67911400  |
| C | -5.88497700 | -0.50961100 | -0.55310000 |
| C | -3.31476100 | -0.02336100 | -0.01333700 |
| H | -6.64605300 | 1.11598200  | 0.67118100  |
| H | -5.94691400 | -0.23328200 | 1.59138000  |
| H | -6.07194100 | 0.07567300  | -1.45488800 |
| H | -6.62892300 | -1.30504100 | -0.48568900 |
| S | -4.25429900 | 1.25933100  | 0.73756200  |
| S | -4.24488800 | -1.32636800 | -0.73749500 |

|   |             |             |             |
|---|-------------|-------------|-------------|
| C | -1.92991300 | -0.00783700 | -0.02625400 |
| C | -1.22263000 | -1.24941900 | -0.39459800 |
| C | -1.23029200 | 1.23927900  | 0.34369300  |
| O | -1.82600600 | 2.15773800  | 0.95903600  |
| O | -1.78863500 | -2.13833300 | -1.03375200 |
| C | 0.14940400  | -1.47157700 | 0.12931400  |
| H | 0.49856000  | -0.82189900 | 0.92125100  |
| C | 0.09085200  | 1.48774000  | -0.15329100 |
| H | 0.51248000  | 0.80918400  | -0.88032100 |
| C | 0.90640900  | -2.47943100 | -0.33455600 |
| H | 0.47155900  | -3.08531400 | -1.12475400 |
| C | 0.81270400  | 2.70239700  | 0.20131000  |
| H | 0.25755800  | 3.42536700  | 0.78505400  |
| C | 2.24769400  | -2.86059900 | 0.09690000  |
| C | 2.87898400  | -3.93640800 | -0.54539400 |
| C | 2.94395700  | -2.20596300 | 1.12644100  |
| C | 4.15436700  | -4.34513300 | -0.17787000 |
| H | 2.35478500  | -4.45448900 | -1.34061500 |
| C | 4.21634900  | -2.61390600 | 1.49349000  |
| H | 2.48643000  | -1.37334000 | 1.64612700  |
| C | 4.82846600  | -3.68493500 | 0.84350000  |
| H | 4.62106800  | -5.17949800 | -0.68774800 |
| H | 4.73635000  | -2.09664200 | 2.29108500  |
| H | 5.82320200  | -4.00084500 | 1.13417100  |
| C | 2.13191200  | 2.97181400  | -0.13161500 |
| C | 2.73522000  | 4.20929900  | 0.29247600  |
| C | 2.96700600  | 2.07253800  | -0.88636100 |
| C | 4.03670000  | 4.51065800  | -0.01117900 |
| H | 2.12997300  | 4.90516400  | 0.86163200  |
| C | 4.27285200  | 2.39418500  | -1.17677000 |
| H | 2.56590700  | 1.12830300  | -1.22877700 |
| C | 4.82669100  | 3.60854300  | -0.74990900 |
| H | 4.46337800  | 5.45063800  | 0.31858000  |
| H | 4.88010500  | 1.69914300  | -1.74476400 |
| H | 5.85408000  | 3.85313600  | -0.98828100 |

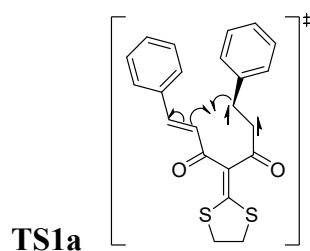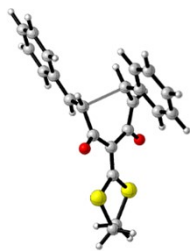

SCF Done: E(UB3LYP) = -1796.22691749 A.U.

Zero-point correction = 0.334578 (Hartree/Particle)

Sum of electronic and thermal Free Energies = -1795.948692

|   |             |             |             |
|---|-------------|-------------|-------------|
| C | 4.86978600  | 1.40003900  | -1.21558900 |
| C | 4.75584600  | 2.34978100  | -0.04965100 |
| C | 2.48909800  | 0.95483700  | -0.08944600 |
| H | 5.31352900  | 1.87135600  | -2.09385800 |
| H | 5.44955900  | 0.51235600  | -0.95795800 |
| H | 4.42573900  | 3.34013500  | -0.36719800 |
| H | 5.69375200  | 2.44727900  | 0.49935500  |
| S | 3.18085600  | 0.85075900  | -1.69962400 |
| S | 3.51115200  | 1.68721300  | 1.13671600  |
| C | 1.21669500  | 0.49201600  | 0.19425900  |
| C | 0.79296500  | 0.36872600  | 1.60149600  |
| C | 0.32888600  | 0.10619900  | -0.91192600 |
| C | -0.34036900 | -0.45728700 | 1.95115500  |
| C | -1.14490500 | 0.12693900  | -0.69483000 |
| C | -1.12085900 | -1.32025300 | 1.06709200  |
| H | -0.57575300 | -0.44437400 | 3.01298900  |
| O | 1.46730500  | 0.87020500  | 2.52113800  |
| O | 0.75000000  | -0.16391500 | -2.03220200 |
| C | -1.77116100 | 1.25674200  | -0.22247500 |
| H | -1.15948200 | 2.01589200  | 0.25453800  |
| C | -3.19219200 | 1.52789800  | -0.24869800 |
| C | -3.67244300 | 2.71089500  | 0.34592300  |
| C | -4.13533300 | 0.66124900  | -0.83611400 |
| C | -5.02535100 | 3.01226200  | 0.35822400  |
| H | -2.96418100 | 3.39304000  | 0.80297200  |
| C | -5.48697000 | 0.96545500  | -0.82196100 |
| H | -3.80524400 | -0.25106500 | -1.31686400 |
| C | -5.94162900 | 2.14040700  | -0.22483300 |
| H | -5.36842500 | 3.92875100  | 0.82351400  |
| H | -6.19394900 | 0.28532300  | -1.28245800 |
| H | -6.99936100 | 2.37394500  | -0.21700800 |
| H | -1.67668000 | -0.56133900 | -1.34020900 |
| H | -2.19727700 | -1.22673900 | 1.17744900  |
| C | -0.67315000 | -2.61330400 | 0.61121200  |
| C | -1.60539700 | -3.50931600 | 0.04062300  |
| C | 0.67236100  | -3.03218800 | 0.69691900  |
| C | -1.21239000 | -4.75236600 | -0.42119600 |
| H | -2.64657900 | -3.21288400 | -0.02691100 |
| C | 1.05739700  | -4.28028500 | 0.23525000  |
| H | 1.41136700  | -2.37323400 | 1.13445400  |
| C | 0.12298200  | -5.14705200 | -0.32832900 |
| H | -1.94623700 | -5.42224900 | -0.85383700 |
| H | 2.09513500  | -4.58207000 | 0.31424000  |
| H | 0.43030900  | -6.12035500 | -0.69079800 |



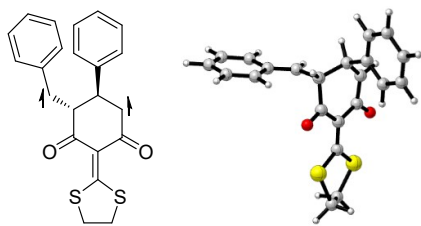

### INT1a

SCF Done: E(UB3LYP) = -1796.26499611 A.U.

Zero-point correction = 0.337811 (Hartree/Particle)

Sum of electronic and thermal Free Energies = -1795.983025

|   |             |             |             |
|---|-------------|-------------|-------------|
| C | 4.42160100  | -1.57660800 | 1.48979700  |
| C | 4.78381000  | -1.82254100 | 0.04633700  |
| C | 2.42291000  | -0.59975800 | 0.02576200  |
| H | 4.67013300  | -2.42354600 | 2.13107300  |
| H | 4.90469400  | -0.68001700 | 1.88141700  |
| H | 4.52864000  | -2.83591800 | -0.26772300 |
| H | 5.84160500  | -1.64412700 | -0.15272900 |
| S | 2.59845800  | -1.34043100 | 1.60357000  |
| S | 3.83821400  | -0.64166600 | -1.00645600 |
| C | 1.23488500  | -0.01875800 | -0.38605700 |
| C | 1.18536300  | 0.73357400  | -1.64985400 |
| C | 0.03892300  | -0.13125500 | 0.44855900  |
| C | -0.00427100 | 1.47780900  | -1.95261700 |
| C | -1.30899200 | 0.29046200  | -0.16508500 |
| C | -1.20071600 | 1.54818900  | -1.06630200 |
| H | 0.03423600  | 2.08647900  | -2.84847000 |
| O | 2.17167900  | 0.79557900  | -2.40875300 |
| O | 0.05959700  | -0.63087400 | 1.56633300  |
| C | -1.82968500 | -0.88436200 | -0.94040000 |
| H | -1.56960300 | -0.92437200 | -1.99373000 |
| C | -2.58546000 | -1.95577500 | -0.41936100 |
| C | -3.04909800 | -2.97417200 | -1.29874600 |
| C | -2.92504700 | -2.07979300 | 0.95531700  |
| C | -3.81185600 | -4.02812800 | -0.83851700 |
| H | -2.79637300 | -2.90824700 | -2.35128700 |
| C | -3.68750900 | -3.14290400 | 1.40285000  |
| H | -2.55723500 | -1.35134700 | 1.66492700  |
| C | -4.14116100 | -4.12174500 | 0.51667800  |
| H | -4.15480400 | -4.78708500 | -1.53211900 |
| H | -3.92890400 | -3.21831300 | 2.45679400  |
| H | -4.73864600 | -4.95015800 | 0.87722800  |
| H | -1.96312200 | 0.50828500  | 0.67958400  |
| H | -2.08966000 | 1.56096700  | -1.70584600 |
| C | -1.24182500 | 2.85360800  | -0.26630200 |
| C | -2.42695100 | 3.59013800  | -0.21451400 |

|   |             |            |             |
|---|-------------|------------|-------------|
| C | -0.13241600 | 3.32316200 | 0.44100600  |
| C | -2.50898100 | 4.75908100 | 0.53421700  |
| H | -3.29600500 | 3.24309400 | -0.76323000 |
| C | -0.21297600 | 4.49108200 | 1.19158300  |
| H | 0.80333600  | 2.77852800 | 0.40905500  |
| C | -1.40088000 | 5.21272800 | 1.24168100  |
| H | -3.43860600 | 5.31523600 | 0.56316100  |
| H | 0.65699100  | 4.83869400 | 1.73604900  |
| H | -1.46165100 | 6.12355000 | 1.82518400  |

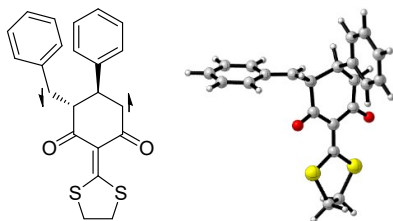

### INT1a-OSS

SCF Done: E(UB3LYP) = -1796.26563043 A.U.

Zero-point correction = 0.337861 (Hartree/Particle)

Sum of electronic and thermal Free Energies = -1795.982622

|   |             |             |             |
|---|-------------|-------------|-------------|
| C | -4.38895000 | -1.66411100 | -1.47271600 |
| C | -4.75216200 | -1.90230600 | -0.02822600 |
| C | -2.40400600 | -0.65071400 | -0.01308600 |
| H | -4.62761300 | -2.51848100 | -2.10790200 |
| H | -4.88002000 | -0.77544000 | -1.87228600 |
| H | -4.48756800 | -2.91058900 | 0.29422800  |
| H | -5.81228900 | -1.73314600 | 0.16656700  |
| S | -2.56813200 | -1.41181000 | -1.58360000 |
| S | -3.82194200 | -0.70333300 | 1.01717900  |
| C | -1.22682600 | -0.04618300 | 0.39241200  |
| C | -1.18304400 | 0.71002400  | 1.65456300  |
| C | -0.02996600 | -0.14156500 | -0.44104400 |
| C | -0.00267500 | 1.47083900  | 1.95421600  |
| C | 1.31381400  | 0.32390200  | 0.15535000  |
| C | 1.17845500  | 1.57977700  | 1.05594900  |
| H | -0.03992600 | 2.05927800  | 2.86353800  |
| O | -2.16581100 | 0.75712300  | 2.41817400  |
| O | -0.04087000 | -0.65571300 | -1.55230100 |
| C | 1.90558300  | -0.80915700 | 0.93966100  |
| H | 1.73182200  | -0.79928100 | 2.01109800  |
| C | 2.64367500  | -1.89202800 | 0.41553200  |
| C | 3.18760200  | -2.85905700 | 1.30626200  |
| C | 2.89314100  | -2.07069000 | -0.97213700 |
| C | 3.94069400  | -3.91848400 | 0.84257500  |
| H | 3.00492200  | -2.74927400 | 2.36955400  |
| C | 3.64878600  | -3.13752500 | -1.42251300 |

|   |             |             |             |
|---|-------------|-------------|-------------|
| H | 2.46192400  | -1.38145600 | -1.68517500 |
| C | 4.18112100  | -4.06631900 | -0.52630700 |
| H | 4.34599800  | -4.63855800 | 1.54390200  |
| H | 3.82241400  | -3.25570100 | -2.48579100 |
| H | 4.77165000  | -4.89863500 | -0.88941900 |
| H | 1.94482200  | 0.55840600  | -0.70348400 |
| H | 2.07465400  | 1.61839300  | 1.68585500  |
| C | 1.17888100  | 2.88393600  | 0.25151000  |
| C | 2.34422300  | 3.65013600  | 0.18857700  |
| C | 0.05233400  | 3.32305200  | -0.44802500 |
| C | 2.39055900  | 4.81879000  | -0.56394500 |
| H | 3.22604100  | 3.32721400  | 0.73160400  |
| C | 0.09740900  | 4.49031700  | -1.20252600 |
| H | -0.86927000 | 2.75553800  | -0.40624900 |
| C | 1.26607200  | 5.24196700  | -1.26409600 |
| H | 3.30548200  | 5.39834600  | -0.60144900 |
| H | -0.78566700 | 4.81429000  | -1.74044500 |
| H | 1.29893000  | 6.15249300  | -1.85029200 |

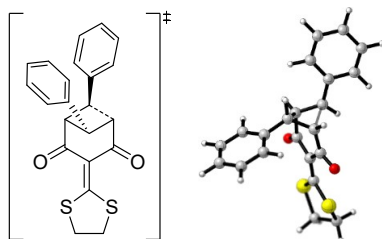

**TS2a**

SCF Done: E(UB3LYP) = -1796.27944305 A.U.

Zero-point correction = 0.339776 (Hartree/Particle)

Sum of electronic and thermal Free Energies = -1795.991690

|   |             |             |             |
|---|-------------|-------------|-------------|
| C | -4.81900400 | -1.79978500 | -0.79591400 |
| C | -4.49327200 | -2.46062500 | 0.52895800  |
| C | -2.36709300 | -1.01937900 | -0.09008900 |
| H | -5.30328000 | -2.49170700 | -1.48659200 |
| H | -5.45849600 | -0.92766400 | -0.65665000 |
| H | -4.05909100 | -3.45154700 | 0.39244300  |
| H | -5.36378000 | -2.53183100 | 1.18219100  |
| S | -3.24561100 | -1.26479000 | -1.59488200 |
| S | -3.27201700 | -1.38221600 | 1.37633100  |
| C | -1.05054600 | -0.57837200 | -0.01936100 |
| C | -0.32618300 | -0.50528900 | 1.21471900  |
| C | -0.28596500 | -0.23685800 | -1.22674200 |
| C | 1.00327000  | 0.05968800  | 1.20128400  |
| C | 1.17119500  | 0.17154000  | -0.99610800 |
| C | 1.24377900  | 1.17687200  | 0.18420000  |
| H | 1.53533300  | 0.03775700  | 2.14758300  |
| O | -0.80437900 | -0.86477400 | 2.35113000  |

|   |             |             |             |
|---|-------------|-------------|-------------|
| O | -0.74662000 | -0.31613900 | -2.35397100 |
| C | 1.89138000  | -0.97281400 | -0.26753000 |
| H | 1.38016400  | -1.92738700 | -0.22688100 |
| C | 3.33029600  | -1.07727000 | -0.19214600 |
| C | 3.89775500  | -2.23000300 | 0.40115100  |
| C | 4.21774500  | -0.08453500 | -0.66451900 |
| C | 5.26711200  | -2.37380800 | 0.52607600  |
| H | 3.23789600  | -3.01042800 | 0.76355800  |
| C | 5.58879200  | -0.23804000 | -0.54316600 |
| H | 3.82984800  | 0.80040500  | -1.15285000 |
| C | 6.12475700  | -1.37716000 | 0.05729500  |
| H | 5.67434400  | -3.26687300 | 0.98516700  |
| H | 6.24880000  | 0.53231000  | -0.92440400 |
| H | 7.19765700  | -1.49027900 | 0.15237700  |
| H | 1.60686900  | 0.47712700  | -1.94941800 |
| H | 2.27903100  | 1.50961000  | 0.29062500  |
| C | 0.35382700  | 2.40233500  | 0.18863000  |
| C | 0.11266200  | 3.10573600  | -0.99318500 |
| C | -0.18766200 | 2.89146800  | 1.37907900  |
| C | -0.64961900 | 4.26934800  | -0.98573800 |
| H | 0.51221600  | 2.74112900  | -1.93234500 |
| C | -0.94725200 | 4.05626400  | 1.38865800  |
| H | -0.02480500 | 2.35533700  | 2.30682800  |
| C | -1.18091600 | 4.74991500  | 0.20587800  |
| H | -0.83211600 | 4.79660400  | -1.91470000 |
| H | -1.36270300 | 4.41759400  | 2.32206900  |
| H | -1.77819300 | 5.65386200  | 0.21196200  |

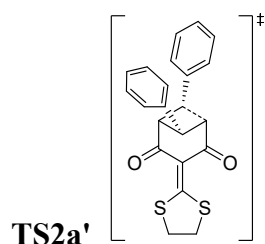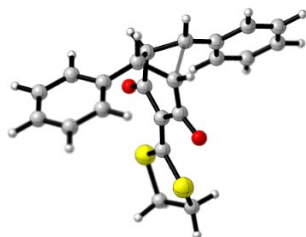

SCF Done: E(UB3LYP) = -1796.27491621 A.U.

Zero-point correction = 0.339834 (Hartree/Particle)

Sum of electronic and thermal Free Energies = -1795.987056

|   |             |            |             |
|---|-------------|------------|-------------|
| C | 0.02418300  | 4.44757000 | -0.61214600 |
| C | -0.60945800 | 4.27974600 | 0.75609600  |
| C | 0.13055900  | 1.85853400 | 0.02385400  |
| H | -0.55751900 | 5.11620800 | -1.24847900 |
| H | 1.04292300  | 4.82776200 | -0.53220600 |
| H | -1.68706100 | 4.12756900 | 0.68910300  |
| H | -0.40046100 | 5.12210000 | 1.41652400  |
| S | 0.06490500  | 2.80760400 | -1.45648300 |

|   |             |             |             |
|---|-------------|-------------|-------------|
| S | 0.15867300  | 2.79398600  | 1.51509500  |
| C | 0.11920900  | 0.47009800  | 0.06599000  |
| C | 0.02922100  | -0.25633500 | 1.29375400  |
| C | 0.11164500  | -0.34245000 | -1.15340200 |
| C | 0.15446700  | -1.69130900 | 1.25080300  |
| C | 0.03240400  | -1.86054900 | -0.95432200 |
| C | 1.05713700  | -2.25175000 | 0.14874400  |
| H | 0.04476700  | -2.20163800 | 2.20248100  |
| O | -0.07677500 | 0.29533600  | 2.45082400  |
| O | 0.15028900  | 0.13985800  | -2.27570900 |
| C | -1.17857900 | -2.31557900 | -0.13539200 |
| H | -1.10880300 | -3.36705400 | 0.13291200  |
| C | -2.53987000 | -1.84133700 | -0.17545200 |
| C | -3.50784600 | -2.54113800 | 0.58427600  |
| C | -2.97300500 | -0.71003000 | -0.89892500 |
| C | -4.82544200 | -2.12906700 | 0.62923800  |
| H | -3.19974900 | -3.41723700 | 1.14472400  |
| C | -4.29948600 | -0.30635600 | -0.85536600 |
| H | -2.28304800 | -0.16165700 | -1.52356700 |
| C | -5.23155300 | -1.00353200 | -0.09102900 |
| H | -5.54396800 | -2.68301400 | 1.22167900  |
| H | -4.61016100 | 0.55865400  | -1.42942400 |
| H | -6.26486700 | -0.67986000 | -0.06065500 |
| H | 0.13784500  | -2.33634100 | -1.93298400 |
| H | 1.06120300  | -3.34412500 | 0.22954800  |
| C | 2.49477300  | -1.78567400 | 0.04785000  |
| C | 3.15280200  | -1.78360800 | -1.18387400 |
| C | 3.21096700  | -1.41554000 | 1.18776100  |
| C | 4.49220900  | -1.41977000 | -1.27419500 |
| H | 2.61693500  | -2.05758900 | -2.08507400 |
| C | 4.55148700  | -1.05569200 | 1.09970500  |
| H | 2.71791900  | -1.39767300 | 2.15267700  |
| C | 5.19708600  | -1.05626700 | -0.13207500 |
| H | 4.98253800  | -1.41591900 | -2.24051600 |
| H | 5.08911700  | -0.76750900 | 1.99541800  |
| H | 6.23955700  | -0.76945400 | -0.20221500 |

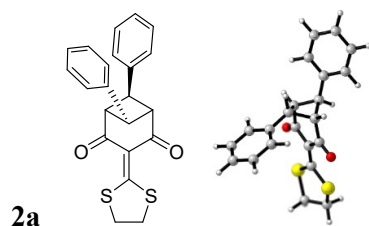

SCF Done: E(UB3LYP) = -1796.32050960 A.U.

Zero-point correction = 0.342162 (Hartree/Particle)

Sum of electronic and thermal Free Energies = -1796.031876

|   |             |             |             |
|---|-------------|-------------|-------------|
| C | 4.84637100  | -1.49358300 | 0.70174200  |
| C | 4.60481500  | -2.26184100 | -0.57565200 |
| C | 2.29495100  | -1.11070100 | 0.06372600  |
| H | 5.47988800  | -2.04195400 | 1.40027800  |
| H | 5.29061500  | -0.51626100 | 0.50808500  |
| H | 4.41413400  | -3.31847400 | -0.38251000 |
| H | 5.43715200  | -2.17185400 | -1.27509000 |
| S | 3.22761400  | -1.23438900 | 1.53993100  |
| S | 3.12646800  | -1.55168200 | -1.41214200 |
| C | 0.98239400  | -0.68875600 | 0.06221900  |
| C | 0.22681000  | -0.52868600 | -1.18499600 |
| C | 0.27592500  | -0.36981800 | 1.30735400  |
| C | -1.20412700 | -0.06261000 | -0.99990600 |
| C | -1.15981800 | 0.09668100  | 1.12589700  |
| C | -1.24937800 | 1.15354300  | -0.01923300 |
| H | -1.70944800 | 0.00161600  | -1.96102400 |
| O | 0.70074000  | -0.74241700 | -2.29264900 |
| O | 0.77618500  | -0.49700400 | 2.41646500  |
| C | -1.86178700 | -0.90555500 | 0.15392900  |
| H | -1.49129400 | -1.93141000 | 0.21859000  |
| C | -3.37339400 | -0.94012900 | 0.12734500  |
| C | -3.99935400 | -1.67349700 | -0.88774000 |
| C | -4.17753600 | -0.30477000 | 1.07279600  |
| C | -5.38267800 | -1.76321600 | -0.95873000 |
| H | -3.39229800 | -2.18171400 | -1.62968400 |
| C | -5.56653000 | -0.39338600 | 1.00485100  |
| H | -3.72751000 | 0.26206000  | 1.87806000  |
| C | -6.17424000 | -1.12025900 | -0.01032800 |
| H | -5.84437900 | -2.33710200 | -1.75367600 |
| H | -6.17137200 | 0.10820200  | 1.75116900  |
| H | -7.25416900 | -1.18869200 | -0.06300200 |
| H | -1.59485700 | 0.30789400  | 2.10004600  |
| H | -2.27088400 | 1.54328000  | -0.03319600 |
| C | -0.28382100 | 2.30543300  | -0.12704400 |
| C | 0.22436200  | 2.92467700  | 1.01685400  |
| C | 0.07361800  | 2.81581600  | -1.37755000 |
| C | 1.06709900  | 4.02674500  | 0.91403900  |
| H | -0.03125600 | 2.54066500  | 1.99771400  |
| C | 0.91604300  | 3.91695500  | -1.48184500 |
| H | -0.30128900 | 2.34446700  | -2.27893100 |
| C | 1.41545000  | 4.52723400  | -0.33571000 |
| H | 1.45495100  | 4.49110200  | 1.81316600  |
| H | 1.18594700  | 4.29536000  | -2.46082200 |

H 2.07429700 5.38365600 -0.41643100

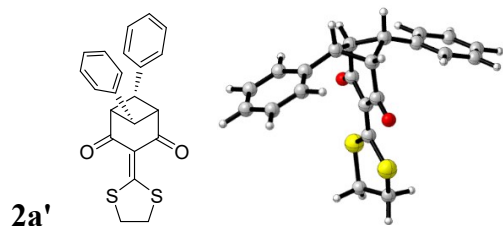

SCF Done: E(UB3LYP) = -1796.32136282 A.U.

Zero-point correction = 0.342061 (Hartree/Particle)

Sum of electronic and thermal Free Energies = -1796.032258

|   |             |             |             |
|---|-------------|-------------|-------------|
| C | 0.36235600  | 4.28716100  | -0.66205400 |
| C | -0.36310300 | 4.28708200  | 0.66195100  |
| C | -0.00009300 | 1.73902000  | -0.00001600 |
| H | -0.01274500 | 5.05616500  | -1.33884600 |
| H | 1.43787700  | 4.41743500  | -0.53410600 |
| H | -1.43865600 | 4.41708900  | 0.53399600  |
| H | 0.01179800  | 5.05622200  | 1.33870300  |
| S | 0.07114300  | 2.66536400  | -1.48352800 |
| S | -0.07149100 | 2.66540600  | 1.48347800  |
| C | 0.00000300  | 0.36073100  | 0.00000100  |
| C | 0.00135900  | -0.40831700 | 1.24753700  |
| C | -0.00120700 | -0.40836100 | -1.24751500 |
| C | -0.00800100 | -1.91693900 | 1.06896800  |
| C | 0.00823800  | -1.91694400 | -1.06887000 |
| C | 1.06713300  | -2.32316200 | 0.00606000  |
| H | -0.01236800 | -2.40672000 | 2.04056400  |
| O | 0.03185100  | 0.10654600  | 2.35717900  |
| O | -0.03172300 | 0.10645300  | -2.35717800 |
| C | -1.06688400 | -2.32323000 | -0.00594200 |
| H | -1.13256700 | -3.41613900 | -0.00822400 |
| C | -2.46041000 | -1.74873500 | -0.01330900 |
| C | -3.13167600 | -1.49146300 | 1.18419400  |
| C | -3.13138300 | -1.52180300 | -1.21723400 |
| C | -4.44042800 | -1.02099400 | 1.17883900  |
| H | -2.62711900 | -1.64954900 | 2.13041300  |
| C | -4.43986600 | -1.05113700 | -1.22412000 |
| H | -2.62586600 | -1.70286000 | -2.15878500 |
| C | -5.09981100 | -0.80021600 | -0.02566200 |
| H | -4.94281100 | -0.82224400 | 2.11828100  |
| H | -4.94187100 | -0.87564900 | -2.16837000 |
| H | -6.11836000 | -0.43065200 | -0.03053800 |
| H | 0.01265100  | -2.40684600 | -2.04040500 |
| H | 1.13299200  | -3.41605300 | 0.00833800  |
| C | 2.46062400  | -1.74852600 | 0.01339600  |

|   |            |             |             |
|---|------------|-------------|-------------|
| C | 3.13186900 | -1.49135200 | -1.18416000 |
| C | 3.13157700 | -1.52136500 | 1.21727300  |
| C | 4.44055400 | -1.02075500 | -1.17888000 |
| H | 2.62729700 | -1.64963500 | -2.13033800 |
| C | 4.44002000 | -1.05054800 | 1.22408400  |
| H | 2.62612100 | -1.70235400 | 2.15887300  |
| C | 5.09992800 | -0.79972700 | 0.02560300  |
| H | 4.94293900 | -0.82207500 | -2.11833600 |
| H | 4.94198400 | -0.87487400 | 2.16832300  |
| H | 6.11844600 | -0.43007700 | 0.03038400  |

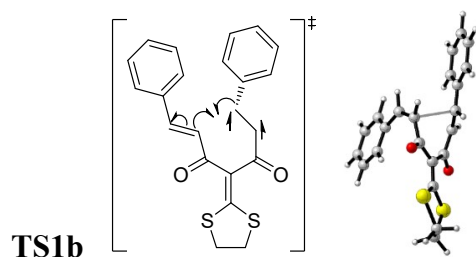

SCF Done: E(UB3LYP) = -1796.21893343 A.U.

Zero-point correction = 0.334417 (Hartree/Particle)

Sum of electronic and thermal Free Energies = -1795.940144

|   |             |             |             |
|---|-------------|-------------|-------------|
| C | 4.88531700  | -1.95637100 | -0.33816600 |
| C | 5.05027000  | -0.96212500 | 0.78359400  |
| C | 2.46819000  | -0.92716400 | 0.10547500  |
| H | 5.71395500  | -1.92469600 | -1.04734100 |
| H | 4.77818800  | -2.97512500 | 0.03745900  |
| H | 5.42738300  | -0.00462700 | 0.42072900  |
| H | 5.71222900  | -1.32904200 | 1.56947700  |
| S | 3.36097500  | -1.53397400 | -1.28108500 |
| S | 3.40817800  | -0.66605800 | 1.56482900  |
| C | 1.10968900  | -0.66730200 | 0.05049500  |
| C | 0.37749200  | -0.35296800 | 1.29788800  |
| C | 0.43590400  | -0.67801900 | -1.24637500 |
| C | -1.03502700 | -0.59597000 | 1.38460200  |
| C | -0.96337500 | -0.16281500 | -1.36881400 |
| C | -1.80536700 | -1.40363100 | 0.45011600  |
| H | -1.48983400 | -0.25243100 | 2.30834700  |
| H | -1.32513500 | -2.30230400 | 0.07271100  |
| O | 0.98818700  | 0.00661400  | 2.32473000  |
| O | 0.98483400  | -1.07335100 | -2.27510700 |
| C | -1.38925500 | 1.13075500  | -1.16007300 |
| H | -2.44725100 | 1.29553600  | -1.34829100 |
| C | -0.67228600 | 2.31715900  | -0.73729300 |
| C | -1.41811100 | 3.39382700  | -0.21529500 |
| C | 0.71799100  | 2.49328400  | -0.88247900 |



|   |             |             |             |
|---|-------------|-------------|-------------|
| C | -0.80254700 | 4.56584900  | 0.19078900  |
| H | -2.49350100 | 3.29062600  | -0.12226400 |
| C | 1.32881300  | 3.67117900  | -0.48215800 |
| H | 1.31613900  | 1.71974700  | -1.34253700 |
| C | 0.57774700  | 4.70880900  | 0.06496800  |
| H | -1.39729900 | 5.37260700  | 0.60239100  |
| H | 2.39877500  | 3.78619400  | -0.60754800 |
| H | 1.06190300  | 5.62608300  | 0.37748500  |
| C | -3.23084700 | -1.36697300 | 0.35343300  |
| C | -3.91677000 | -2.38330800 | -0.35350000 |
| C | -4.00533800 | -0.32646200 | 0.91818300  |
| C | -5.29319300 | -2.36407600 | -0.48045000 |
| H | -3.34533100 | -3.19313500 | -0.79409000 |
| C | -5.38473600 | -0.31587800 | 0.78718500  |
| H | -3.51485700 | 0.47192200  | 1.46120800  |
| C | -6.03942900 | -1.33027500 | 0.08989200  |
| H | -5.79428200 | -3.15770200 | -1.02217400 |
| H | -5.95834200 | 0.48848300  | 1.23310000  |
| H | -7.11813400 | -1.31808100 | -0.00653000 |
| H | -1.58597400 | -0.78478200 | -2.00113600 |

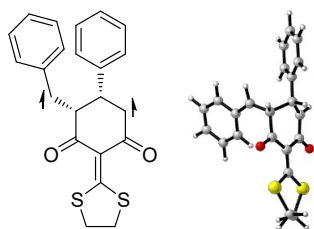

### INT1b

SCF Done: E(UB3LYP) = -1796.25499222 A.U.

Zero-point correction = 0.337601 (Hartree/Particle)

Sum of electronic and thermal Free Energies = -1795.972736

|   |             |             |             |
|---|-------------|-------------|-------------|
| C | -5.25105900 | -0.89281600 | 0.83962600  |
| C | -5.30729800 | -0.51132900 | -0.61872900 |
| C | -2.72952700 | -0.71247000 | 0.02226400  |
| H | -6.00061000 | -0.36956200 | 1.43515400  |
| H | -5.37029700 | -1.96796700 | 0.98235600  |
| H | -5.45599500 | 0.56156700  | -0.75097600 |
| H | -6.08874700 | -1.04764400 | -1.15908200 |
| S | -3.60567300 | -0.40168500 | 1.50662300  |
| S | -3.70572000 | -0.96727100 | -1.40905800 |
| C | -1.34444100 | -0.74772200 | -0.02070200 |
| C | -0.65461500 | -1.11022000 | -1.26923600 |
| C | -0.57248500 | -0.37183600 | 1.16279000  |
| C | 0.76033000  | -1.34785600 | -1.20934500 |
| C | 0.95981200  | -0.39033700 | 1.10616300  |
| C | 1.47408800  | -1.47768800 | 0.08889500  |

|   |             |             |             |
|---|-------------|-------------|-------------|
| H | 1.24612900  | -1.60290700 | -2.14324300 |
| H | 1.14891500  | -2.43754600 | 0.52404500  |
| O | -1.27586200 | -1.27786800 | -2.33444400 |
| O | -1.11506900 | -0.02675100 | 2.20606400  |
| C | 1.63716500  | 0.94747600  | 0.94867400  |
| H | 2.65232900  | 0.94023800  | 1.32993000  |
| C | 1.22034400  | 2.18502800  | 0.41168600  |
| C | 2.15243900  | 3.26491300  | 0.45067800  |
| C | -0.04545100 | 2.46271300  | -0.17351700 |
| C | 1.84365800  | 4.51153100  | -0.05234800 |
| H | 3.12762200  | 3.08954200  | 0.89090700  |
| C | -0.34271800 | 3.71621900  | -0.67540100 |
| H | -0.79542900 | 1.68955900  | -0.23731100 |
| C | 0.59069500  | 4.75231300  | -0.62227900 |
| H | 2.57843400  | 5.30686600  | -0.00349100 |
| H | -1.31701400 | 3.89211600  | -1.11647900 |
| H | 0.34671100  | 5.73064700  | -1.01764400 |
| C | 2.98455300  | -1.54625500 | -0.01908000 |
| C | 3.70000800  | -2.40874700 | 0.81344300  |
| C | 3.69559700  | -0.75312600 | -0.92273200 |
| C | 5.08774200  | -2.47850800 | 0.75027600  |
| H | 3.16501100  | -3.03914200 | 1.51635800  |
| C | 5.08296800  | -0.82238800 | -0.99103000 |
| H | 3.16354600  | -0.07136600 | -1.57600400 |
| C | 5.78435100  | -1.68438400 | -0.15412100 |
| H | 5.62279300  | -3.15802800 | 1.40311800  |
| H | 5.61647300  | -0.20046800 | -1.70020000 |
| H | 6.86499600  | -1.73910700 | -0.20910800 |
| H | 1.24793500  | -0.74361700 | 2.10183200  |

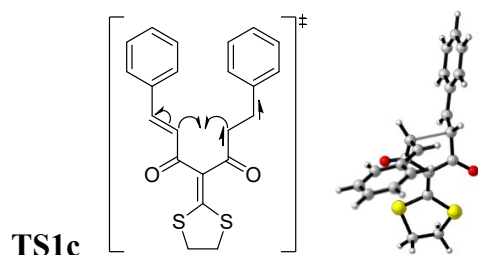

SCF Done: E(UB3LYP) = -1796.22504212 A.U.

Zero-point correction = 0.333735 (Hartree/Particle)

Sum of electronic and thermal Free Energies = -1795.948469

|   |            |            |             |
|---|------------|------------|-------------|
| C | 3.89195700 | 3.17711600 | -0.57126100 |
| C | 3.14500300 | 4.07077500 | 0.39349900  |
| C | 1.62753200 | 1.92453700 | 0.01249300  |
| H | 4.38414800 | 3.74609200 | -1.36110500 |
| H | 4.63103600 | 2.55877100 | -0.06047900 |

|   |             |             |             |
|---|-------------|-------------|-------------|
| H | 2.59040700  | 4.85308400  | -0.12617000 |
| H | 3.80948700  | 4.52939000  | 1.12700000  |
| S | 2.66690600  | 2.07677000  | -1.38956300 |
| S | 1.95413700  | 3.02861000  | 1.33225200  |
| C | 0.61819500  | 0.99576000  | 0.07136400  |
| C | 0.39132700  | -0.00361100 | -0.97789400 |
| C | -0.32858500 | 0.93344600  | 1.18155900  |
| C | -0.36874200 | -1.19670100 | -0.52148300 |
| C | -1.61614800 | 0.20454400  | 0.88783100  |
| H | -1.04407600 | -1.61198600 | -1.26893300 |
| H | -1.89585000 | -0.53933400 | 1.62590300  |
| O | -0.14500400 | 1.44561900  | 2.27691400  |
| O | 0.78295000  | 0.11702600  | -2.13518300 |
| C | -2.57413000 | 0.77254700  | 0.09758900  |
| H | -2.27867900 | 1.60861400  | -0.53114800 |
| C | 0.20635400  | -2.10463000 | 0.48068500  |
| H | -0.25832200 | -2.16899300 | 1.46090900  |
| C | -3.95714400 | 0.35326900  | -0.04095500 |
| C | -4.78693700 | 1.04346200  | -0.94233000 |
| C | -4.51786400 | -0.71825500 | 0.67829500  |
| C | -6.11480600 | 0.68273800  | -1.11886300 |
| H | -4.37427700 | 1.87137100  | -1.50813100 |
| C | -5.84352400 | -1.07827400 | 0.49907400  |
| H | -3.91218900 | -1.27216000 | 1.38460400  |
| C | -6.65054300 | -0.38107200 | -0.39942200 |
| H | -6.73304300 | 1.23097600  | -1.81979600 |
| H | -6.25458300 | -1.90699500 | 1.06348000  |
| H | -7.68684200 | -0.66588800 | -0.53519300 |
| C | 1.31569600  | -2.95424300 | 0.25130700  |
| C | 1.99465300  | -3.01302100 | -0.99577000 |
| C | 1.78329800  | -3.80111400 | 1.29299600  |
| C | 3.06881600  | -3.86496000 | -1.17535200 |
| H | 1.66713200  | -2.37910700 | -1.81031800 |
| C | 2.85739200  | -4.64630500 | 1.09922200  |
| H | 1.28193200  | -3.77263700 | 2.25412500  |
| C | 3.51037300  | -4.68653100 | -0.13606200 |
| H | 3.57186300  | -3.89368900 | -2.13499600 |
| H | 3.19554800  | -5.28112100 | 1.91002900  |
| H | 4.35301900  | -5.35049000 | -0.28579600 |

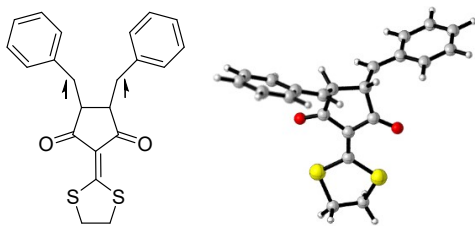

### INT1c

SCF Done: E(UB3LYP) = -1796.27499679 A.U.

Zero-point correction = 0.336857 (Hartree/Particle)

Sum of electronic and thermal Free Energies = -1795.994500

|   |             |             |             |
|---|-------------|-------------|-------------|
| C | -0.73506100 | -5.10311900 | -0.17142200 |
| C | 0.73861100  | -5.10265300 | 0.17156700  |
| C | 0.00089400  | -2.56153400 | -0.00001900 |
| H | -0.98399200 | -5.87344600 | -0.90217600 |
| H | -1.35687100 | -5.23609400 | 0.71460800  |
| H | 1.36050000  | -5.23540800 | -0.71443900 |
| H | 0.98801100  | -5.87269400 | 0.90246000  |
| S | -1.15429600 | -3.48234700 | -0.93389700 |
| S | 1.15687200  | -3.48149200 | 0.93376800  |
| C | 0.00035100  | -1.18964700 | 0.00002900  |
| C | -0.94013300 | -0.35352400 | -0.73320000 |
| C | 0.94020800  | -0.35279100 | 0.73321900  |
| C | -0.71525900 | 1.12102700  | -0.29689400 |
| C | 0.71429900  | 1.12157600  | 0.29673900  |
| H | -0.79130200 | 1.75497800  | -1.18333400 |
| H | 0.78982500  | 1.75567900  | 1.18312600  |
| O | 1.77259600  | -0.72435000 | 1.53889200  |
| O | -1.77223800 | -0.72573200 | -1.53887100 |
| C | 1.75167900  | 1.49569200  | -0.71496300 |
| H | 1.46923200  | 1.40243500  | -1.75882500 |
| C | -1.75292000 | 1.49436700  | 0.71481100  |
| H | -1.47054200 | 1.40072800  | 1.75866400  |
| C | 3.06888800  | 1.91726300  | -0.43721800 |
| C | 3.92663200  | 2.28355800  | -1.51174200 |
| C | 3.59848400  | 2.01058000  | 0.87815300  |
| C | 5.21456100  | 2.72399900  | -1.28450300 |
| H | 3.54886100  | 2.21620300  | -2.52605900 |
| C | 4.89129600  | 2.45218700  | 1.09134600  |
| H | 2.99437300  | 1.70248400  | 1.72052400  |
| C | 5.70927300  | 2.81485900  | 0.01965100  |
| H | 5.84460100  | 2.99945000  | -2.12231400 |
| H | 5.27452800  | 2.50921000  | 2.10360500  |
| H | 6.72086900  | 3.15909300  | 0.19693200  |
| C | -3.07027600 | 1.91550400  | 0.43715100  |
| C | -3.59993400 | 2.00891800  | -0.87819000 |

|   |             |            |             |
|---|-------------|------------|-------------|
| C | -3.92817000 | 2.28115700 | 1.51177300  |
| C | -4.89291600 | 2.45007600 | -1.09125800 |
| H | -2.99572300 | 1.70128100 | -1.72066600 |
| C | -5.21626800 | 2.72117100 | 1.28465700  |
| H | -3.55037000 | 2.21367000 | 2.52606900  |
| C | -5.71102600 | 2.81218300 | -0.01946500 |
| H | -5.27617900 | 2.50719400 | -2.10350000 |
| H | -5.84641300 | 2.99615300 | 2.12254400  |
| H | -6.72275300 | 3.15608400 | -0.19664300 |

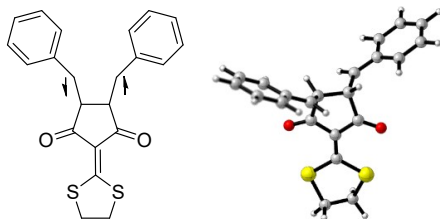

### INT1c-OSS

SCF Done: E(UB3LYP) = -1796.27659634 A.U.

Zero-point correction = 0.336797 (Hartree/Particle)

Sum of electronic and thermal Free Energies = -1795.996609

|   |             |             |             |
|---|-------------|-------------|-------------|
| C | 0.73885900  | 5.26720300  | -0.16751100 |
| C | -0.73671100 | 5.26753700  | 0.16773200  |
| C | 0.00047500  | 2.72585000  | -0.00006900 |
| H | 0.99218300  | 6.03793800  | -0.89634600 |
| H | 1.35582500  | 5.39930400  | 0.72203000  |
| H | -1.35361700 | 5.40009200  | -0.72178400 |
| H | -0.98965300 | 6.03827200  | 0.89670000  |
| S | 1.16047300  | 3.64691700  | -0.92915500 |
| S | -1.15911400 | 3.64733200  | 0.92911500  |
| C | 0.00018500  | 1.35462800  | -0.00012200 |
| C | 0.93693000  | 0.51841500  | -0.73873100 |
| C | -0.93684700 | 0.51874900  | 0.73850100  |
| C | 0.71436600  | -0.95705900 | -0.30614200 |
| C | -0.71473100 | -0.95682300 | 0.30599800  |
| H | 0.77619700  | -1.58830700 | -1.19481400 |
| H | -0.77673600 | -1.58798000 | 1.19472600  |
| O | -1.76774000 | 0.88853500  | 1.54612500  |
| O | 1.76794100  | 0.88789800  | -1.54637800 |
| C | -1.74627900 | -1.33825100 | -0.69648800 |
| H | -1.53334600 | -1.08657100 | -1.73096300 |
| C | 1.74578000  | -1.33870600 | 0.69639500  |
| H | 1.53294800  | -1.08678600 | 1.73083200  |
| C | -2.98793200 | -1.95397200 | -0.42432300 |
| C | -3.84230000 | -2.31004300 | -1.50391800 |
| C | -3.44210500 | -2.25169700 | 0.88792800  |
| C | -5.05392500 | -2.93430100 | -1.28566100 |

|   |             |             |             |
|---|-------------|-------------|-------------|
| H | -3.52254600 | -2.08814700 | -2.51610900 |
| C | -4.65830800 | -2.87677100 | 1.09338800  |
| H | -2.84276600 | -1.96326600 | 1.74101000  |
| C | -5.47264700 | -3.22705500 | 0.01505500  |
| H | -5.68258000 | -3.19783600 | -2.12830700 |
| H | -4.98442800 | -3.08891200 | 2.10499200  |
| H | -6.42389800 | -3.71619800 | 0.18546200  |
| C | 2.98722200  | -1.95490200 | 0.42432300  |
| C | 3.44130100  | -2.25298400 | -0.88787600 |
| C | 3.84143700  | -2.31114400 | 1.50398100  |
| C | 4.65727500  | -2.87854900 | -1.09322000 |
| H | 2.84208400  | -1.96446100 | -1.74101400 |
| C | 5.05282900  | -2.93589500 | 1.28584000  |
| H | 3.52174900  | -2.08898700 | 2.51613600  |
| C | 5.47146000  | -3.22899500 | -0.01482600 |
| H | 4.98333000  | -3.09096000 | -2.10478900 |
| H | 5.68136600  | -3.19954200 | 2.12853900  |
| H | 6.42252600  | -3.71852800 | -0.18515400 |

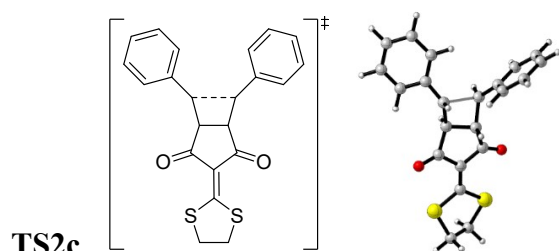

SCF Done: E(UB3LYP) = -1796.25438149 A.U.

Zero-point correction = 0.338800 (Hartree/Particle)

Sum of electronic and thermal Free Energies = -1795.969500

|   |             |             |             |
|---|-------------|-------------|-------------|
| C | -5.93940300 | -0.51894500 | -0.73283300 |
| C | -5.99432700 | 0.24323400  | 0.57236900  |
| C | -3.41673500 | -0.07673000 | -0.01279900 |
| H | -6.69042400 | -1.30956800 | -0.77320900 |
| H | -6.07023300 | 0.13994800  | -1.58880000 |
| H | -6.13331300 | -0.42155800 | 1.42519500  |
| H | -6.77988000 | 0.99988400  | 0.57197200  |
| S | -4.29788400 | -1.32614400 | -0.87561200 |
| S | -4.39464900 | 1.12778400  | 0.79748200  |
| C | -2.05065600 | -0.04702500 | 0.02101800  |
| C | -1.17247500 | -1.10165600 | -0.56397600 |
| C | -1.24564800 | 1.05809600  | 0.62693300  |
| C | 0.18381900  | -0.74564700 | 0.01676500  |
| C | 0.14152800  | 0.77332000  | 0.09091200  |
| H | 0.14640200  | -1.12564300 | 1.05114700  |
| H | 0.10377800  | 1.13742300  | -0.94634300 |

|   |             |             |             |
|---|-------------|-------------|-------------|
| O | -1.66781100 | 1.97616600  | 1.30456100  |
| O | -1.51875800 | -2.03042800 | -1.26785700 |
| C | 1.64966600  | 0.90155800  | 0.55199500  |
| H | 1.78452200  | 0.56995600  | 1.54576400  |
| C | 1.70477400  | -0.79268500 | -0.43014300 |
| H | 1.81452000  | -0.42152000 | -1.41837200 |
| C | 2.52807800  | 1.91823000  | 0.05109800  |
| C | 3.87161900  | 1.71710200  | -0.26987700 |
| C | 2.00584500  | 3.21539200  | -0.01459100 |
| C | 4.67720000  | 2.78657100  | -0.64459500 |
| H | 4.29920400  | 0.71547800  | -0.22445400 |
| C | 2.81153200  | 4.28544800  | -0.38650100 |
| H | 0.96256200  | 3.39216000  | 0.24089200  |
| C | 4.15299700  | 4.07462500  | -0.70125500 |
| H | 5.72008200  | 2.61434800  | -0.89139900 |
| H | 2.39269700  | 5.28817300  | -0.42322600 |
| H | 4.77774800  | 4.91294600  | -0.99393500 |
| C | 2.63859600  | -1.78414700 | 0.01501500  |
| C | 2.87966800  | -2.13170000 | 1.34809900  |
| C | 3.27181200  | -2.52602200 | -0.99048800 |
| C | 3.72377600  | -3.18681100 | 1.66354800  |
| H | 2.41534900  | -1.56790500 | 2.15433600  |
| C | 4.11173900  | -3.58874300 | -0.67948200 |
| H | 3.09429000  | -2.27593800 | -2.03098400 |
| C | 4.34131500  | -3.92276900 | 0.65594400  |
| H | 3.89882500  | -3.44230600 | 2.70907200  |
| H | 4.58822400  | -4.15237400 | -1.47696200 |
| H | 5.00039700  | -4.74984200 | 0.90282900  |

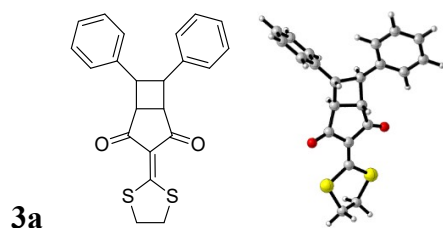

SCF Done: E(UB3LYP) = -1796.28546586 A.U.

Zero-point correction = 0.341068 (Hartree/Particle)

Sum of electronic and thermal Free Energies = -1795.998625

|   |             |             |             |
|---|-------------|-------------|-------------|
| C | -5.96159600 | 0.50795200  | 0.71182400  |
| C | -5.99533700 | -0.25662200 | -0.59291200 |
| C | -3.42838500 | 0.07305000  | 0.02413200  |
| H | -6.71337300 | 1.29759700  | 0.74192700  |
| H | -6.10162600 | -0.15131900 | 1.56912500  |
| H | -6.13072400 | 0.40824300  | -1.44661700 |
| H | -6.78010200 | -1.01404500 | -0.60205500 |

|   |             |             |             |
|---|-------------|-------------|-------------|
| S | -4.32070000 | 1.32137800  | 0.87440400  |
| S | -4.39509200 | -1.13811500 | -0.79848700 |
| C | -2.06233100 | 0.04490500  | 0.00481800  |
| C | -1.18994800 | 1.10765200  | 0.59569000  |
| C | -1.25151100 | -1.05529400 | -0.59863000 |
| C | 0.17141800  | 0.75698800  | 0.01606200  |
| C | 0.13618900  | -0.76155000 | -0.05714600 |
| H | 0.12641700  | 1.13276600  | -1.01572200 |
| H | 0.10041500  | -1.13273400 | 0.97766700  |
| O | -1.66256300 | -1.97481000 | -1.27627000 |
| O | -1.54730900 | 2.03132000  | 1.29519900  |
| C | 1.64317700  | -0.72462700 | -0.43634000 |
| H | 1.76083200  | -0.50739300 | -1.50226600 |
| C | 1.68797500  | 0.65337200  | 0.37035400  |
| H | 1.80934800  | 0.41926900  | 1.43023200  |
| C | 2.53049200  | -1.87050600 | -0.03477600 |
| C | 3.85751000  | -1.65934000 | 0.34716400  |
| C | 2.04331600  | -3.17927000 | -0.06677300 |
| C | 4.67597800  | -2.73034500 | 0.69096800  |
| H | 4.25597900  | -0.65180300 | 0.37512900  |
| C | 2.86188700  | -4.25084400 | 0.27421800  |
| H | 1.01663000  | -3.36071100 | -0.36668400 |
| C | 4.18120900  | -4.02997900 | 0.65560700  |
| H | 5.70225300  | -2.54782600 | 0.98780400  |
| H | 2.46655500  | -5.25944900 | 0.24313500  |
| H | 4.81847800  | -4.86390800 | 0.92485700  |
| C | 2.62981200  | 1.75900900  | -0.01772500 |
| C | 2.80685800  | 2.14944800  | -1.34858100 |
| C | 3.34782500  | 2.43886100  | 0.96908900  |
| C | 3.67179100  | 3.18530800  | -1.68067800 |
| H | 2.26906400  | 1.64093200  | -2.14081500 |
| C | 4.21417900  | 3.47669900  | 0.64145900  |
| H | 3.22257500  | 2.15354100  | 2.00796200  |
| C | 4.37973900  | 3.85358000  | -0.68621400 |
| H | 3.79455600  | 3.47043600  | -2.71897400 |
| H | 4.75852200  | 3.99072000  | 1.42495000  |
| H | 5.05438900  | 4.66071200  | -0.94541600 |

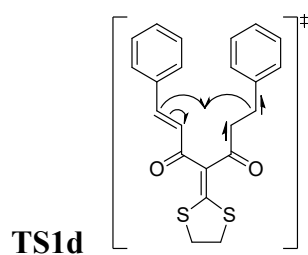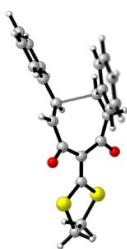



SCF Done: E(UB3LYP) = -1796.21110274 A.U.

Zero-point correction = 0.334915 (Hartree/Particle)

Sum of electronic and thermal Free Energies = -1795.931605

|   |             |             |             |
|---|-------------|-------------|-------------|
| C | 5.57874100  | -1.01970700 | -0.13552300 |
| C | 5.52933100  | -0.15162000 | 1.09360700  |
| C | 3.05460100  | -0.20347300 | 0.06826900  |
| H | 6.49348000  | -0.87844500 | -0.71396000 |
| H | 5.47455300  | -2.07779600 | 0.11179300  |
| H | 5.88561000  | 0.85969900  | 0.88906100  |
| H | 6.09934600  | -0.56694000 | 1.92640000  |
| S | 4.17997500  | -0.54186500 | -1.23813900 |
| S | 3.77838700  | -0.03188900 | 1.65851300  |
| C | 1.67901200  | -0.08869300 | -0.14037500 |
| C | 1.23468200  | 0.06420800  | -1.54137000 |
| C | 0.82618500  | -0.06846300 | 1.07237300  |
| C | -0.09480000 | 0.41095300  | -2.01009000 |
| C | -0.56071000 | -0.49358500 | 1.07775200  |
| C | -1.42357000 | 0.48518400  | -1.39982300 |
| H | -0.06612300 | 0.60916600  | -3.08001900 |
| C | -1.22170500 | -1.16422500 | 0.07129600  |
| H | -1.07570400 | -0.23391600 | 1.99443500  |
| O | 2.09441700  | -0.00515900 | -2.45053300 |
| O | 1.32333100  | 0.24614900  | 2.16649400  |
| H | -0.61974300 | -1.65943700 | -0.68282700 |
| C | -2.58128500 | -1.71137000 | 0.21057300  |
| C | -2.97167800 | -2.78038600 | -0.60779100 |
| C | -3.51299700 | -1.20376500 | 1.12659900  |
| C | -4.24095900 | -3.33445900 | -0.50710200 |
| H | -2.26418500 | -3.18619300 | -1.32307100 |
| C | -4.78253000 | -1.75724900 | 1.22620800  |
| H | -3.24859500 | -0.36704700 | 1.76051400  |
| C | -5.15237700 | -2.82477900 | 0.41251300  |
| H | -4.51789300 | -4.16590800 | -1.14432800 |
| H | -5.48825700 | -1.35206100 | 1.94177200  |
| H | -6.14336900 | -3.25481200 | 0.49431400  |
| H | -2.17560200 | -0.07591600 | -1.95006600 |
| C | -1.92739900 | 1.69100500  | -0.77574500 |
| C | -3.31763100 | 1.89748000  | -0.66943900 |
| C | -1.06810700 | 2.66709700  | -0.23504900 |
| C | -3.82322100 | 3.02866800  | -0.04984400 |
| H | -3.99491700 | 1.16026600  | -1.08456500 |
| C | -1.58041200 | 3.79591500  | 0.38553900  |
| H | 0.00447700  | 2.53637600  | -0.30723100 |
| C | -2.95762100 | 3.98310900  | 0.48303300  |

|   |             |            |            |
|---|-------------|------------|------------|
| H | -4.89534600 | 3.17178800 | 0.01650700 |
| H | -0.90296800 | 4.53483400 | 0.79658300 |
| H | -3.35383100 | 4.86741100 | 0.96735200 |

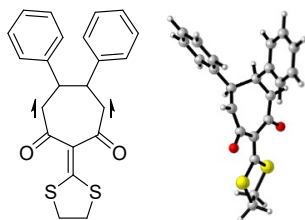

### INT1d

SCF Done: E(UB3LYP) = -1796.24069455 A.U.

Zero-point correction = 0.337949 (Hartree/Particle)

Sum of electronic and thermal Free Energies = -1795.958561

|   |             |             |             |
|---|-------------|-------------|-------------|
| C | -5.73700200 | -0.63072300 | 0.53621100  |
| C | -5.70135400 | -0.41296600 | -0.95389200 |
| C | -3.20409400 | -0.07584300 | -0.04788100 |
| H | -6.63525400 | -0.21817100 | 0.99893700  |
| H | -5.65825500 | -1.68855600 | 0.79351200  |
| H | -6.03102700 | 0.59195900  | -1.22358000 |
| H | -6.30143800 | -1.14248100 | -1.50032500 |
| S | -4.30607100 | 0.26218600  | 1.27919800  |
| S | -3.96425800 | -0.61601900 | -1.53525900 |
| C | -1.82480200 | 0.06966700  | 0.07382700  |
| C | -1.32107600 | 0.77704700  | 1.26790100  |
| C | -0.98660900 | -0.38829300 | -1.05095900 |
| C | 0.05963000  | 1.07677700  | 1.56814600  |
| C | 0.41523000  | -0.68472200 | -0.92309900 |
| C | 1.35393000  | 0.49431000  | 1.11029000  |
| H | 0.13842000  | 1.82955500  | 2.34544300  |
| C | 1.16690900  | -0.86297200 | 0.34769700  |
| H | 0.89201100  | -0.91927800 | -1.86626200 |
| O | -2.14908500 | 1.24052000  | 2.08437200  |
| O | -1.50531700 | -0.62191300 | -2.16291000 |
| H | 0.53780100  | -1.45734200 | 1.02267600  |
| C | 2.47318900  | -1.62064500 | 0.18144700  |
| C | 2.78754600  | -2.64615900 | 1.07557200  |
| C | 3.39005800  | -1.31678200 | -0.82767400 |
| C | 3.98264500  | -3.35005200 | 0.96971300  |
| H | 2.08446300  | -2.90323800 | 1.86111000  |
| C | 4.58514600  | -2.01933000 | -0.93762500 |
| H | 3.17756400  | -0.52255000 | -1.53267700 |
| C | 4.88650800  | -3.03796900 | -0.03960200 |
| H | 4.20264600  | -4.14604200 | 1.67133000  |
| H | 5.28264600  | -1.76859200 | -1.72808200 |
| H | 5.81636800  | -3.58686800 | -0.12883800 |

|   |            |            |             |
|---|------------|------------|-------------|
| H | 1.90553400 | 0.23972700 | 2.02453400  |
| C | 2.20078900 | 1.53933300 | 0.38742000  |
| C | 3.51835800 | 1.76860000 | 0.78689800  |
| C | 1.68379100 | 2.29352100 | -0.66993200 |
| C | 4.30744400 | 2.71272700 | 0.13800000  |
| H | 3.93440700 | 1.19724600 | 1.60905800  |
| C | 2.47201400 | 3.23390100 | -1.32396600 |
| H | 0.65700700 | 2.15230400 | -0.98475000 |
| C | 3.78747600 | 3.44601800 | -0.92278900 |
| H | 5.32897100 | 2.87342800 | 0.46189100  |
| H | 2.05410400 | 3.80672900 | -2.14328100 |
| H | 4.40015300 | 4.18197300 | -1.42962100 |

## 5.2 Computational studies of unsymmetrical bis(cinnamoyl)ketenedithioacetal

### 5.2.1 Computational analysis of 1a-OMe

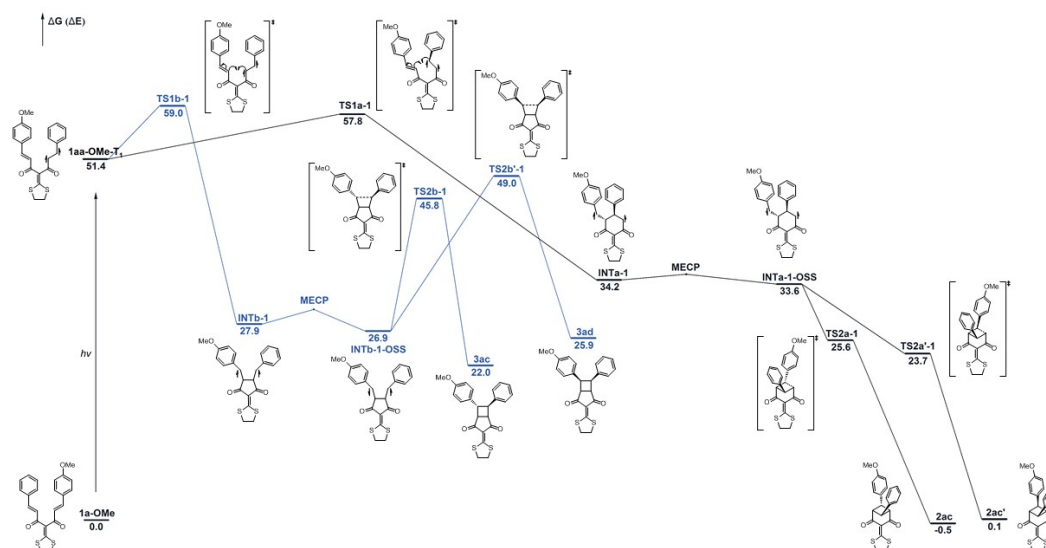

### 5.2.2 Cartesian coordinates and energies of all optimized structures

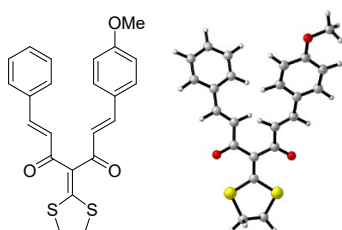

**1a-OMe**

SCF Done: E(RB3LYP) = -1910.87992309 A.U.

Zero-point correction= 0.370758 (Hartree/Particle)

Sum of electronic and thermal Free Energies= -1910.570475

|   |            |             |             |
|---|------------|-------------|-------------|
| C | 6.21272900 | -1.25486700 | -0.76876100 |
| C | 6.01657800 | -1.97066500 | 0.54335300  |
| C | 3.68551000 | -0.80887000 | -0.03660000 |
| H | 7.18134600 | -0.75618200 | -0.83103900 |

|   |             |             |             |
|---|-------------|-------------|-------------|
| H | 6.10744600  | -1.93284300 | -1.61734400 |
| H | 6.38419800  | -1.37956900 | 1.38378400  |
| H | 6.49894200  | -2.94932700 | 0.56006900  |
| S | 4.92709300  | 0.05458200  | -0.92820100 |
| S | 4.21521700  | -2.25917800 | 0.79890600  |
| C | 2.36895100  | -0.37294700 | 0.00464300  |
| C | 1.33956000  | -1.31573300 | 0.49358500  |
| C | 2.07982100  | 1.00362100  | -0.44394900 |
| O | 2.87840100  | 1.61658000  | -1.15532500 |
| O | 1.65897700  | -2.29350600 | 1.17426900  |
| C | -0.05853500 | -1.14989900 | 0.03547200  |
| H | -0.26369600 | -0.39648300 | -0.71260000 |
| C | 0.88073600  | 1.69671100  | 0.09153300  |
| H | 0.32762600  | 1.21236800  | 0.88460500  |
| C | -1.03156300 | -1.95482300 | 0.49665700  |
| H | -0.73271700 | -2.69698900 | 1.23203800  |
| C | 0.52803800  | 2.90831000  | -0.36454700 |
| H | 1.14277000  | 3.32451100  | -1.15783300 |
| C | -2.43815600 | -1.95701400 | 0.12507700  |
| C | -3.28978100 | -2.91060800 | 0.69320700  |
| C | -3.00590700 | -1.04347000 | -0.78466100 |
| C | -4.64324400 | -2.97209600 | 0.38080300  |
| H | -2.88122700 | -3.62613100 | 1.39804900  |
| C | -4.34531100 | -1.08936700 | -1.10357500 |
| H | -2.38741100 | -0.28354900 | -1.24574200 |
| C | -5.17894900 | -2.05656100 | -0.52429400 |
| H | -5.26139500 | -3.72811500 | 0.84397600  |
| H | -4.77925900 | -0.38473900 | -1.80189200 |
| C | -0.58823900 | 3.73810600  | 0.08137900  |
| C | -0.79542900 | 4.97670700  | -0.54330200 |
| C | -1.46962100 | 3.36031000  | 1.10751600  |
| C | -1.84055300 | 5.80850000  | -0.16191400 |
| H | -0.12317400 | 5.28404700  | -1.33652500 |
| C | -2.51229600 | 4.18983700  | 1.48816300  |
| H | -1.33912800 | 2.41094000  | 1.61184700  |
| C | -2.70336100 | 5.41786300  | 0.85579100  |
| H | -1.98049500 | 6.76118900  | -0.65868200 |
| H | -3.18175700 | 3.88052600  | 2.28206200  |
| H | -3.51970200 | 6.06343700  | 1.15694200  |
| O | -6.48236000 | -2.01624800 | -0.90602400 |
| C | -7.38185200 | -2.97079600 | -0.35623600 |
| H | -7.44773300 | -2.87343600 | 0.73124500  |
| H | -8.35154600 | -2.75314000 | -0.79802600 |
| H | -7.08495400 | -3.99107800 | -0.61560000 |

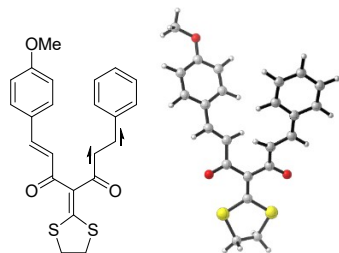

**1aa-OMe-T<sub>1</sub>**

SCF Done: E(UB3LYP) = -1910.79798597 A.U.

Zero-point correction= 0.367144 (Hartree/Particle)

Sum of electronic and thermal Free Energies= -1910.493822

|   |             |             |             |
|---|-------------|-------------|-------------|
| C | 6.26388100  | -1.07886900 | -0.80915600 |
| C | 6.10123000  | -1.87013300 | 0.46405400  |
| C | 3.74247300  | -0.71720500 | -0.02469900 |
| H | 7.22710100  | -0.56875300 | -0.86285900 |
| H | 6.14665800  | -1.70928900 | -1.69221100 |
| H | 6.47764600  | -1.32223100 | 1.32945900  |
| H | 6.59684000  | -2.84119700 | 0.41620700  |
| S | 4.96542900  | 0.22626800  | -0.86638100 |
| S | 4.30939500  | -2.19788600 | 0.73454300  |
| C | 2.41823200  | -0.31897900 | 0.02994900  |
| C | 1.41019400  | -1.30357500 | 0.47392000  |
| C | 2.07490800  | 1.06048800  | -0.37198500 |
| O | 2.86937100  | 1.75372800  | -1.05329200 |
| O | 1.73614200  | -2.28670500 | 1.14328900  |
| C | 0.01663300  | -1.15736900 | -0.00834300 |
| H | -0.17090200 | -0.45022800 | -0.80564600 |
| C | 0.90122600  | 1.68138100  | 0.16808100  |
| H | 0.34614400  | 1.16669100  | 0.93889000  |
| C | -0.96865500 | -1.92321400 | 0.49482300  |
| H | -0.68253200 | -2.61656300 | 1.28123200  |
| C | 0.52988400  | 3.04152500  | -0.20089200 |
| H | 1.25306400  | 3.57970600  | -0.80029700 |
| C | -2.37129000 | -1.93951800 | 0.11231500  |
| C | -3.24169900 | -2.82449000 | 0.75896500  |
| C | -2.91817600 | -1.10735900 | -0.88472100 |
| C | -4.59316200 | -2.89530800 | 0.44163900  |
| H | -2.84876800 | -3.47727400 | 1.53036600  |
| C | -4.25540900 | -1.16453400 | -1.21061400 |
| H | -2.28383300 | -0.40530500 | -1.41115600 |
| C | -5.10796900 | -2.06100400 | -0.55035900 |
| H | -5.22615800 | -3.59619800 | 0.96705900  |
| H | -4.67318400 | -0.52412300 | -1.97725700 |
| C | -0.66405000 | 3.66220400  | 0.13649700  |
| C | -0.91350100 | 5.01236300  | -0.29781100 |

|   |             |             |             |
|---|-------------|-------------|-------------|
| C | -1.70400700 | 3.02976100  | 0.90648500  |
| C | -2.08175300 | 5.65828800  | 0.01162400  |
| H | -0.14789700 | 5.51295200  | -0.87901300 |
| C | -2.87113600 | 3.69605500  | 1.20238500  |
| H | -1.56948500 | 2.01516400  | 1.25630300  |
| C | -3.07922900 | 5.01114500  | 0.76596900  |
| H | -2.24089000 | 6.67564000  | -0.32615400 |
| H | -3.63856600 | 3.19676400  | 1.78230500  |
| H | -3.99951000 | 5.52724400  | 1.00875700  |
| O | -6.40722800 | -2.03851800 | -0.94637000 |
| C | -7.32541400 | -2.92650300 | -0.32063800 |
| H | -7.40015400 | -2.72842000 | 0.75248600  |
| H | -8.28762700 | -2.73751000 | -0.79097800 |

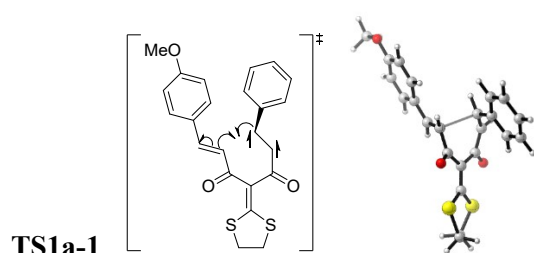

SCF Done: E(UB3LYP) = -1910.78783466 A.U.

Zero-point correction= 0.367021 (Hartree/Particle)

Sum of electronic and thermal Free Energies= -1910.479932

|   |             |             |             |
|---|-------------|-------------|-------------|
| C | -5.06006700 | -2.28643900 | -1.21772200 |
| C | -4.74447600 | -3.20363600 | -0.06261000 |
| C | -2.82001200 | -1.36435600 | -0.09211400 |
| H | -5.39958200 | -2.83100300 | -2.10011700 |
| H | -5.81197800 | -1.54313200 | -0.94823800 |
| H | -4.21702200 | -4.10003200 | -0.39264800 |
| H | -5.63878400 | -3.50071400 | 0.48751100  |
| S | -3.52585800 | -1.38982700 | -1.69970100 |
| S | -3.65938900 | -2.30945500 | 1.12795700  |
| C | -1.67354900 | -0.64649000 | 0.19389600  |
| C | -1.27662200 | -0.45139600 | 1.60114900  |
| C | -0.89385500 | -0.06688400 | -0.90975600 |
| C | -0.34932500 | 0.59861200  | 1.95427300  |
| C | 0.54724300  | 0.23520200  | -0.69121400 |
| C | 0.20141200  | 1.62852600  | 1.07648000  |
| H | -0.09329400 | 0.61536500  | 3.01122900  |
| O | -1.81584400 | -1.10231500 | 2.51681000  |
| O | -1.36901700 | 0.11506000  | -2.02663300 |
| C | 1.40854800  | -0.73514200 | -0.22912000 |
| H | 0.97760300  | -1.61268200 | 0.24254400  |
| C | 2.85025900  | -0.69177600 | -0.26296800 |

|   |             |             |             |
|---|-------------|-------------|-------------|
| C | 3.58634200  | -1.74753500 | 0.30044500  |
| C | 3.58764000  | 0.36922400  | -0.83463600 |
| C | 4.97401700  | -1.76102100 | 0.30630700  |
| H | 3.05245500  | -2.57892500 | 0.74718900  |
| C | 4.96529700  | 0.36818200  | -0.83482900 |
| H | 3.06962200  | 1.20192500  | -1.29358000 |
| C | 5.67540100  | -0.69661200 | -0.26340900 |
| H | 5.49406200  | -2.59655400 | 0.75327800  |
| H | 5.52489000  | 1.18302400  | -1.27710500 |
| H | 0.91363700  | 1.02486000  | -1.33583200 |
| O | 7.03039300  | -0.59957500 | -0.31533700 |
| C | 7.80923000  | -1.64885300 | 0.24553900  |
| H | 7.61663400  | -2.59984200 | -0.25948300 |
| H | 8.84714700  | -1.36222500 | 0.09237300  |
| H | 7.61640900  | -1.75697400 | 1.31681400  |
| C | -0.54072400 | 2.78229700  | 0.62942100  |
| C | -1.94564400 | 2.87755200  | 0.73028900  |
| C | 0.15046200  | 3.87039900  | 0.04990800  |
| C | -2.61568200 | 4.00068400  | 0.27289800  |
| H | -2.50657600 | 2.06652400  | 1.17666700  |
| C | -0.52606400 | 4.98664300  | -0.40789100 |
| H | 1.23137800  | 3.82493200  | -0.02878900 |
| C | -1.91556500 | 5.05992700  | -0.30128700 |
| H | -3.69432700 | 4.05236800  | 0.36354500  |
| H | 0.02733800  | 5.80772100  | -0.84851900 |
| H | -2.44512200 | 5.93363300  | -0.66099000 |

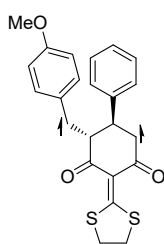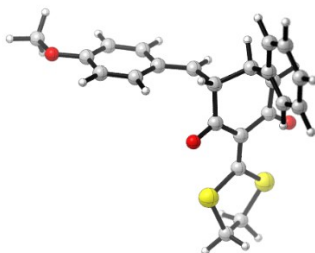

**INTa-1**

SCF Done: E(UB3LYP) = -1910.82545241A.U.

Zero-point correction= 0.370096 (Hartree/Particle)

Sum of electronic and thermal Free Energies= -1910.514500

|   |             |             |             |
|---|-------------|-------------|-------------|
| C | -2.50383400 | -4.21744100 | -1.50780600 |
| C | -2.61970500 | -4.63604200 | -0.06332600 |
| C | -1.85577800 | -2.08995400 | -0.04166600 |
| H | -2.05027000 | -4.99053600 | -2.12987600 |
| H | -3.47282900 | -3.94500600 | -1.92911400 |
| H | -1.72185200 | -5.15192000 | 0.28080000  |
| H | -3.48713000 | -5.27298500 | 0.11661000  |
| S | -1.40185500 | -2.74415400 | -1.60283700 |

|   |             |             |             |
|---|-------------|-------------|-------------|
| S | -2.84489200 | -3.12615300 | 0.96930900  |
| C | -1.45174800 | -0.83324200 | 0.37442700  |
| C | -1.99232400 | -0.26386400 | 1.61894100  |
| C | -0.50694900 | -0.06190800 | -0.43591200 |
| C | -1.68979900 | 1.10496500  | 1.92854300  |
| C | 0.13145700  | 1.18308300  | 0.20162700  |
| C | -0.86074600 | 1.99843700  | 1.06955700  |
| H | -2.17942300 | 1.51059400  | 2.80618700  |
| O | -2.75720800 | -0.91722000 | 2.35467100  |
| O | -0.13911300 | -0.42843500 | -1.54537500 |
| C | 1.29544900  | 0.70120100  | 1.01875800  |
| H | 1.09536900  | 0.47714400  | 2.06193100  |
| C | 2.59874900  | 0.45839100  | 0.54272200  |
| C | 3.60732300  | 0.02415700  | 1.44265700  |
| C | 2.99178700  | 0.63048300  | -0.81607900 |
| C | 4.90932900  | -0.20472100 | 1.03822100  |
| H | 3.34562600  | -0.12785600 | 2.48388600  |
| C | 4.28612800  | 0.40199200  | -1.22002600 |
| H | 2.25567000  | 0.91852300  | -1.55398700 |
| C | 5.26294300  | -0.01315700 | -0.30254400 |
| H | 5.63957000  | -0.53169100 | 1.76545000  |
| H | 4.57527600  | 0.52959900  | -2.25600800 |
| H | 0.47603100  | 1.80199700  | -0.62750200 |
| O | 6.51125800  | -0.20637300 | -0.81081000 |
| C | 7.54323100  | -0.63329800 | 0.06742900  |
| H | 7.31222200  | -1.60720000 | 0.50916900  |
| H | 8.43849200  | -0.71827000 | -0.54463500 |
| H | 7.71589000  | 0.09719400  | 0.86342700  |
| C | -1.72888400 | 2.95315500  | 0.24481700  |
| C | -2.81537400 | 2.50049400  | -0.50789600 |
| C | -1.42246400 | 4.31514300  | 0.22068300  |
| C | -3.56496100 | 3.38612600  | -1.27443700 |
| H | -3.08408300 | 1.45121800  | -0.49798100 |
| C | -2.17226200 | 5.20288400  | -0.54341200 |
| H | -0.58620700 | 4.68494700  | 0.80429900  |
| C | -3.24666900 | 4.73992300  | -1.29533700 |
| H | -4.40254000 | 3.01615300  | -1.85389200 |
| H | -1.91702500 | 6.25608600  | -0.54925600 |
| H | -3.83344400 | 5.42917600  | -1.89066700 |



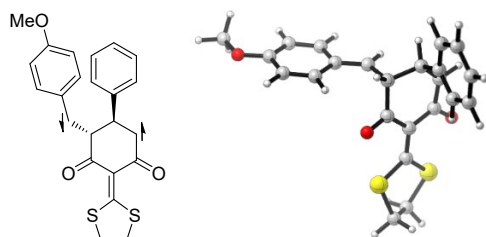

### INTa-1-OSS

SCF Done: E(UB3LYP) = -1910.82639432 A.U.

Zero-point correction= 0.370167 (Hartree/Particle)

Sum of electronic and thermal Free Energies= -1910.514185

|   |             |             |             |
|---|-------------|-------------|-------------|
| C | -2.38319800 | -4.26133100 | -1.48582800 |
| C | -2.49591700 | -4.68389900 | -0.04223500 |
| C | -1.76937500 | -2.12341400 | -0.01789100 |
| H | -1.92020500 | -5.02807100 | -2.10890700 |
| H | -3.35487400 | -3.99926800 | -1.90743800 |
| H | -1.59264900 | -5.19046500 | 0.30149400  |
| H | -3.35620400 | -5.33128700 | 0.13488600  |
| S | -1.29705100 | -2.77668400 | -1.57587700 |
| S | -2.74068600 | -3.17932200 | 0.99310500  |
| C | -1.39800500 | -0.85610200 | 0.39155600  |
| C | -1.94145900 | -0.29377100 | 1.63958400  |
| C | -0.47886000 | -0.06192000 | -0.42178600 |
| C | -1.67699900 | 1.08449600  | 1.93906000  |
| C | 0.10472400  | 1.22783800  | 0.18702300  |
| C | -0.91739200 | 2.00723400  | 1.05326300  |
| H | -2.14552300 | 1.46926300  | 2.83736000  |
| O | -2.67496700 | -0.96692500 | 2.38842200  |
| O | -0.08781800 | -0.43071800 | -1.52264200 |
| C | 1.30037000  | 0.86574800  | 1.01769400  |
| H | 1.14098800  | 0.79402400  | 2.08882300  |
| C | 2.59387400  | 0.58189800  | 0.53776400  |
| C | 3.63507800  | 0.28715800  | 1.45650900  |
| C | 2.94397200  | 0.58483000  | -0.84342600 |
| C | 4.92939000  | 0.02964300  | 1.04615900  |
| H | 3.40507400  | 0.26712000  | 2.51597400  |
| C | 4.23146400  | 0.33097800  | -1.25287800 |
| H | 2.17882700  | 0.76018000  | -1.58706500 |
| C | 5.24119600  | 0.05333600  | -0.31868100 |
| H | 5.68639700  | -0.18802900 | 1.78668500  |
| H | 4.49006700  | 0.33045400  | -2.30462300 |
| H | 0.40540600  | 1.84045700  | -0.66537900 |
| O | 6.47743000  | -0.18257200 | -0.83438500 |
| C | 7.54179300  | -0.48314100 | 0.05835400  |
| H | 7.33898400  | -1.39660400 | 0.62501800  |
| H | 8.41968700  | -0.63315900 | -0.56609100 |

|   |             |            |             |
|---|-------------|------------|-------------|
| H | 7.72584400  | 0.34376500 | 0.75049500  |
| C | -1.83718100 | 2.90681100 | 0.22069700  |
| C | -2.92035000 | 2.39629800 | -0.49861600 |
| C | -1.58136900 | 4.27778100 | 0.15705400  |
| C | -3.71575000 | 3.23482000 | -1.27199800 |
| H | -3.15130300 | 1.33896600 | -0.45594500 |
| C | -2.37718400 | 5.11846400 | -0.61384300 |
| H | -0.74911000 | 4.69219600 | 0.71599600  |
| C | -3.44768000 | 4.59833100 | -1.33302400 |
| H | -4.55056300 | 2.82035400 | -1.82475300 |
| H | -2.16089300 | 6.17976700 | -0.65005300 |
| H | -4.07069600 | 5.25066700 | -1.93311300 |
| H | -0.33946100 | 2.68497400 | 1.69278200  |

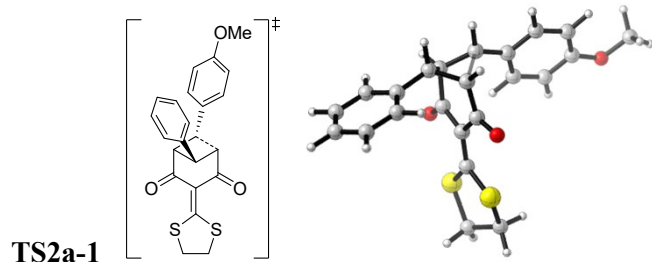

SCF Done: E(UB3LYP) = -1910.83906224 A.U.

Zero-point correction= 0.372071 (Hartree/Particle)

Sum of electronic and thermal Free Energies= -1910.522479

|   |             |             |             |
|---|-------------|-------------|-------------|
| C | 1.24851800  | 4.41199300  | -0.59500100 |
| C | 0.52264500  | 4.37452100  | 0.73535600  |
| C | 0.86539100  | 1.84908300  | 0.03624000  |
| H | 0.84691300  | 5.18092100  | -1.25701500 |
| H | 2.31685700  | 4.58183800  | -0.45707500 |
| H | -0.55882900 | 4.43353000  | 0.60738200  |
| H | 0.85192100  | 5.16599700  | 1.40997200  |
| S | 1.00627700  | 2.79551600  | -1.44456300 |
| S | 0.94909100  | 2.77619700  | 1.53210200  |
| C | 0.67733000  | 0.46697700  | 0.05932100  |
| C | 0.46950700  | -0.26686500 | 1.26729400  |
| C | 0.61301900  | -0.32200600 | -1.17010000 |
| C | 0.43402900  | -1.71529700 | 1.19204900  |
| C | 0.37816200  | -1.82990800 | -1.00257900 |
| C | 1.32421600  | -2.34678400 | 0.11884800  |
| H | 0.23445100  | -2.22253700 | 2.13116700  |
| O | 0.40705900  | 0.24573600  | 2.43913600  |
| O | 0.71785400  | 0.16187500  | -2.28926000 |
| C | -0.89420200 | -2.17194200 | -0.22008400 |
| H | -0.94444000 | -3.23217500 | 0.01878800  |
| C | -2.19315400 | -1.55980500 | -0.27901600 |

|   |             |             |             |
|---|-------------|-------------|-------------|
| C | -3.25518500 | -2.18000400 | 0.41896700  |
| C | -2.49184500 | -0.35125000 | -0.95474700 |
| C | -4.52554200 | -1.64118300 | 0.46395700  |
| H | -3.06326100 | -3.10995600 | 0.94292600  |
| C | -3.75814800 | 0.19031200  | -0.92113100 |
| H | -1.73453100 | 0.15062300  | -1.53847400 |
| C | -4.78750200 | -0.43897800 | -0.20804300 |
| H | -5.30174300 | -2.15381000 | 1.01432900  |
| H | -3.98313700 | 1.10809300  | -1.44972100 |
| H | 0.45775700  | -2.29741100 | -1.98766900 |
| H | 1.21896800  | -3.43593800 | 0.17533800  |
| C | 2.80176700  | -2.01997900 | 0.07465900  |
| C | 3.49859900  | -2.07416500 | -1.13429200 |
| C | 3.51033600  | -1.72781100 | 1.24148600  |
| C | 4.86920200  | -1.84210200 | -1.17630700 |
| H | 2.96882700  | -2.28759800 | -2.05530200 |
| C | 4.88162900  | -1.49883200 | 1.20152400  |
| H | 2.98826200  | -1.66531300 | 2.18908400  |
| C | 5.56622300  | -1.55541400 | -0.00765400 |
| H | 5.39050200  | -1.87970300 | -2.12557700 |
| H | 5.41315500  | -1.26806100 | 2.11727200  |
| H | 6.63335800  | -1.37057300 | -0.04007500 |
| O | -5.99257500 | 0.18064500  | -0.23449100 |
| C | -7.08213700 | -0.40633100 | 0.46887100  |
| H | -6.86951600 | -0.47702200 | 1.53906500  |

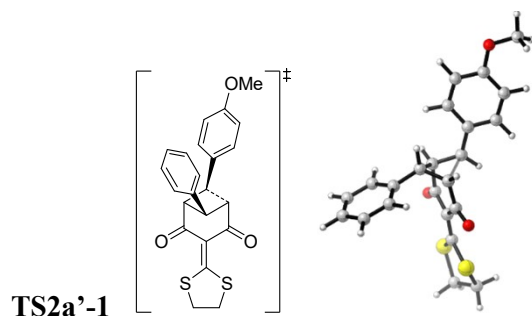

SCF Done: E(UB3LYP) = -1910.84215754 A.U.

Zero-point correction= 0.372048 (Hartree/Particle)

Sum of electronic and thermal Free Energies= -1910.525546

|   |             |             |             |
|---|-------------|-------------|-------------|
| C | -5.17598700 | -2.30081900 | -0.74507100 |
| C | -4.74645300 | -2.95733800 | 0.55151200  |
| C | -2.81305600 | -1.26164700 | -0.06642300 |
| H | -5.60277700 | -3.02084800 | -1.44510100 |
| H | -5.89963700 | -1.50526300 | -0.56447000 |
| H | -4.21226100 | -3.89138600 | 0.37352000  |
| H | -5.58772100 | -3.14277800 | 1.22070800  |
| S | -3.68933500 | -1.58119400 | -1.56181500 |

|   |             |             |             |
|---|-------------|-------------|-------------|
| S | -3.62863900 | -1.77910300 | 1.40707100  |
| C | -1.56259900 | -0.64556700 | -0.01877600 |
| C | -0.82392100 | -0.47700100 | 1.19651800  |
| C | -0.88614500 | -0.18989600 | -1.23750500 |
| C | 0.42652300  | 0.26045000  | 1.14723200  |
| C | 0.50870900  | 0.41525900  | -1.04103700 |
| C | 0.47824000  | 1.41526500  | 0.14561700  |
| H | 0.98289100  | 0.29760500  | 2.07921100  |
| O | -1.21102900 | -0.87833500 | 2.34808700  |
| O | -1.35563500 | -0.31320300 | -2.35836900 |
| C | 1.39600100  | -0.62419600 | -0.33794500 |
| H | 1.01671800  | -1.63822600 | -0.29001900 |
| C | 2.83299600  | -0.53813500 | -0.30443400 |
| C | 3.57215400  | -1.61114500 | 0.24426600  |
| C | 3.57616800  | 0.57427300  | -0.77310300 |
| C | 4.95137800  | -1.58433200 | 0.33916500  |
| H | 3.03763800  | -2.48312100 | 0.60394900  |
| C | 4.94909500  | 0.60721300  | -0.69053100 |
| H | 3.06488300  | 1.41152100  | -1.23057500 |
| C | 5.65548700  | -0.46718100 | -0.12682700 |
| H | 5.47012700  | -2.43037900 | 0.76763200  |
| H | 5.51131100  | 1.45438700  | -1.06308500 |
| H | 0.87309000  | 0.77973200  | -2.00364500 |
| H | 1.45931800  | 1.89035000  | 0.22594300  |
| C | -0.57438200 | 2.50258800  | 0.19571400  |
| C | -0.97313400 | 3.15862600  | -0.97041100 |
| C | -1.11712200 | 2.91600300  | 1.41408500  |
| C | -1.89074600 | 4.20305000  | -0.92044100 |
| H | -0.57704300 | 2.84728100  | -1.92993800 |
| C | -2.03222000 | 3.96150700  | 1.46583800  |
| H | -0.83437500 | 2.41038300  | 2.33015500  |
| C | -2.42198800 | 4.60969200  | 0.29834000  |
| H | -2.19436300 | 4.69411400  | -1.83748400 |
| H | -2.44723300 | 4.26396400  | 2.42014100  |
| H | -3.13976400 | 5.42037100  | 0.33762100  |
| O | 7.00374800  | -0.33042300 | -0.08626000 |
| C | 7.78299200  | -1.38324600 | 0.47171700  |
| H | 7.65633800  | -2.31068800 | -0.09343800 |
| H | 8.81708400  | -1.05453600 | 0.40147100  |

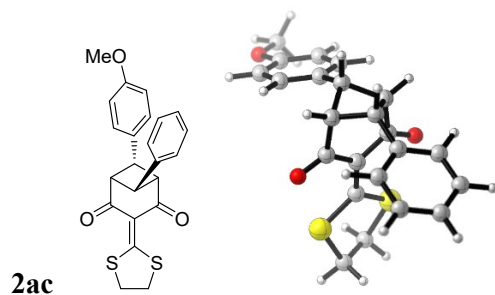

SCF Done: E(RB3LYP) = -1910.88074840 A.U.

Zero-point correction= 0.374336 (Hartree/Particle)

Sum of electronic and thermal Free Energies= -1910.562829

|   |             |             |             |
|---|-------------|-------------|-------------|
| C | 0.95571700  | 4.28714700  | -0.68465300 |
| C | 0.18383200  | 4.29973800  | 0.61300100  |
| C | 0.53752800  | 1.74514600  | -0.03035100 |
| H | 0.61428800  | 5.05897500  | -1.37590200 |
| H | 2.02753800  | 4.40472400  | -0.51887400 |
| H | -0.88462300 | 4.44373300  | 0.44624300  |
| H | 0.54453900  | 5.06581700  | 1.30087600  |
| S | 0.67346100  | 2.66701300  | -1.51247500 |
| S | 0.42457000  | 2.67670600  | 1.44787000  |
| C | 0.51991400  | 0.36744300  | -0.02733800 |
| C | 0.46441000  | -0.39918300 | 1.22040400  |
| C | 0.55280300  | -0.40460700 | -1.27282400 |
| C | 0.44249600  | -1.90787200 | 1.04413700  |
| C | 0.53715300  | -1.91203000 | -1.09120000 |
| C | 1.55069000  | -2.32959000 | 0.02216300  |
| H | 0.39655400  | -2.39509900 | 2.01604400  |
| O | 0.45858200  | 0.11800000  | 2.32962800  |
| O | 0.56840000  | 0.10876500  | -2.38348900 |
| C | -0.58193400 | -2.30409800 | -0.06733100 |
| H | -0.65509900 | -3.39668300 | -0.07208800 |
| C | -1.96595100 | -1.71142700 | -0.12453600 |
| C | -2.66885800 | -1.40985100 | 1.03804400  |
| C | -2.61326700 | -1.51082000 | -1.34956300 |
| C | -3.97508200 | -0.92481600 | 0.99823600  |
| H | -2.19702000 | -1.54223500 | 2.00489800  |
| C | -3.90959200 | -1.02956800 | -1.40747200 |
| H | -2.09285200 | -1.72422700 | -2.27626300 |
| C | -4.60255200 | -0.73422200 | -0.23092000 |
| H | -4.48072700 | -0.69699300 | 1.92599300  |
| H | -4.40403700 | -0.86928300 | -2.35745500 |
| H | 0.57086600  | -2.40393500 | -2.06119100 |
| H | 1.60199500  | -3.42320400 | 0.02851300  |
| C | 2.95076900  | -1.77442400 | 0.08170100  |

|   |             |             |             |
|---|-------------|-------------|-------------|
| C | 3.66716100  | -1.51643700 | -1.08918100 |
| C | 3.58282600  | -1.56860700 | 1.31024400  |
| C | 4.98190700  | -1.06612000 | -1.03358300 |
| H | 3.19373900  | -1.65810900 | -2.05389000 |
| C | 4.89724000  | -1.11836200 | 1.36744200  |
| H | 3.04201500  | -1.75101400 | 2.23173900  |
| C | 5.60232500  | -0.86675200 | 0.19507600  |
| H | 5.51974000  | -0.86645300 | -1.95301700 |
| H | 5.36852700  | -0.95946500 | 2.33029200  |
| H | 6.62555100  | -0.51296000 | 0.23869400  |
| O | -5.87428900 | -0.26249400 | -0.38902900 |
| C | -6.62324200 | 0.05406400  | 0.77457400  |
| H | -6.14202300 | 0.84676800  | 1.35580000  |
| H | -7.59093900 | 0.40351100  | 0.42073200  |

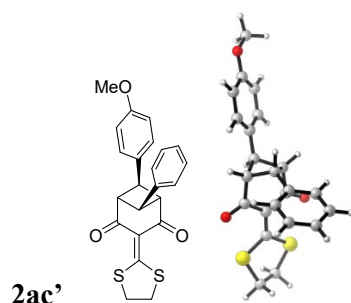

SCF Done: E(RB3LYP) = -1910.87982819 A.U.

Zero-point correction= 0.374449 (Hartree/Particle)

Sum of electronic and thermal Free Energies= -1910.561995

|   |             |             |             |
|---|-------------|-------------|-------------|
| C | -5.30676900 | -1.87014700 | -0.64773700 |
| C | -4.95753000 | -2.65237800 | 0.59584300  |
| C | -2.78758200 | -1.26203400 | -0.06033200 |
| H | -5.90485000 | -2.45414700 | -1.34868400 |
| H | -5.83643000 | -0.94678100 | -0.40921200 |
| H | -4.67206100 | -3.67878700 | 0.36107200  |
| H | -5.77481000 | -2.66557800 | 1.31829200  |
| S | -3.74466500 | -1.42975800 | -1.51664100 |
| S | -3.53074900 | -1.82981600 | 1.41980800  |
| C | -1.52288000 | -0.71411700 | -0.07728900 |
| C | -0.75266700 | -0.51710100 | 1.15589200  |
| C | -0.88435200 | -0.29189800 | -1.32878000 |
| C | 0.62044400  | 0.09008000  | 0.95106900  |
| C | 0.50516400  | 0.30244600  | -1.16770400 |
| C | 0.52504400  | 1.33101800  | 0.00636100  |
| H | 1.14419900  | 0.17546900  | 1.90068900  |
| O | -1.17409300 | -0.80984400 | 2.26706600  |
| O | -1.40152100 | -0.43326200 | -2.42845100 |
| C | 1.32461900  | -0.65580300 | -0.24428500 |

|   |             |             |             |
|---|-------------|-------------|-------------|
| H | 1.04580000  | -1.70864800 | -0.32952500 |
| C | 2.83193400  | -0.54760700 | -0.26293300 |
| C | 3.56633700  | -1.31062100 | 0.64524900  |
| C | 3.54822700  | 0.26057500  | -1.15028100 |
| C | 4.95639000  | -1.27371300 | 0.68613000  |
| H | 3.04418100  | -1.95653500 | 1.34369400  |
| C | 4.93367800  | 0.31028500  | -1.12578200 |
| H | 3.02656800  | 0.86168100  | -1.88450000 |
| C | 5.65014900  | -0.45526700 | -0.20594700 |
| H | 5.48015400  | -1.88406700 | 1.40844600  |
| H | 5.48034200  | 0.93814400  | -1.81832300 |
| H | 0.89419100  | 0.57979400  | -2.14495400 |
| H | 1.50535100  | 1.81489300  | 0.00897500  |
| C | -0.54021100 | 2.38499900  | 0.16738800  |
| C | -1.11397600 | 2.99633500  | -0.94957200 |
| C | -0.92983500 | 2.81567500  | 1.43798400  |
| C | -2.05009800 | 4.01454900  | -0.80120400 |
| H | -0.83522500 | 2.67122300  | -1.94537700 |
| C | -1.86596900 | 3.83297900  | 1.58791400  |
| H | -0.50580100 | 2.34770800  | 2.31907900  |
| C | -2.42872800 | 4.43734800  | 0.46842200  |
| H | -2.48694100 | 4.47390600  | -1.68020900 |
| H | -2.15898000 | 4.15019900  | 2.58189900  |
| H | -3.15991800 | 5.22847100  | 0.58487200  |
| O | 7.00847100  | -0.33985700 | -0.25823200 |
| C | 7.78600000  | -1.10229900 | 0.65335800  |
| H | 7.62816900  | -2.17580400 | 0.51146000  |
| H | 8.82373400  | -0.85916700 | 0.43545400  |
| H | 7.56175300  | -0.83489400 | 1.69052300  |

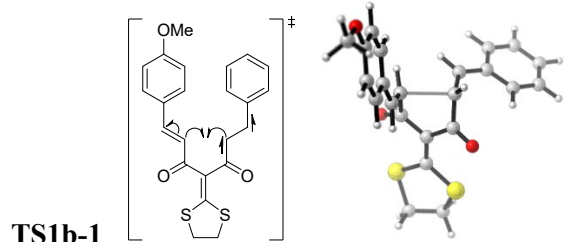

SCF Done: E(UB3LYP) = -1910.78585231 A.U.

Zero-point correction= 0.366065 (Hartree/Particle)

Sum of electronic and thermal Free Energies= -1910.480444

|   |             |             |             |
|---|-------------|-------------|-------------|
| C | -4.55326400 | -3.10363800 | -0.71253600 |
| C | -3.88028800 | -4.00239300 | 0.30101600  |
| C | -2.29658700 | -1.89363000 | -0.01850900 |
| H | -5.01568900 | -3.67080400 | -1.52148100 |
| H | -5.30388700 | -2.46275800 | -0.24855700 |

|   |             |             |             |
|---|-------------|-------------|-------------|
| H | -3.31600200 | -4.80252000 | -0.17968800 |
| H | -4.59415400 | -4.43814300 | 1.00137700  |
| S | -3.26009300 | -2.04211400 | -1.47535400 |
| S | -2.72025000 | -2.97509800 | 1.29334500  |
| C | -1.27412100 | -0.98563700 | 0.08658700  |
| C | -0.96722500 | 0.00028800  | -0.95701500 |
| C | -0.38648900 | -0.92866700 | 1.24597700  |
| C | -0.21915300 | 1.18217600  | -0.46038200 |
| C | 0.92923800  | -0.23250300 | 1.00767500  |
| H | 0.49538300  | 1.59286400  | -1.17325800 |
| H | 1.19457800  | 0.50368000  | 1.75880000  |
| O | -0.64258400 | -1.41838600 | 2.33729600  |
| O | -1.28287300 | -0.13108700 | -2.13663300 |
| C | 1.91081300  | -0.83147300 | 0.26713100  |
| H | 1.62130500  | -1.65986300 | -0.37460800 |
| C | -0.83199400 | 2.09633900  | 0.51394200  |
| H | -0.41334900 | 2.15813900  | 1.51497100  |
| C | 3.30664700  | -0.45544700 | 0.19608700  |
| C | 4.16300500  | -1.15704800 | -0.66515600 |
| C | 3.87273800  | 0.59542000  | 0.94849000  |
| C | 5.51099100  | -0.84376100 | -0.78462700 |
| H | 3.75982800  | -1.96955900 | -1.25941300 |
| C | 5.20735200  | 0.91828700  | 0.83893000  |
| H | 3.25558800  | 1.16542500  | 1.63159300  |
| C | 6.04273500  | 0.20185200  | -0.02952500 |
| H | 6.12966600  | -1.41391500 | -1.46308700 |
| H | 5.63685000  | 1.72544500  | 1.41913700  |
| C | -1.92059200 | 2.95715600  | 0.23245400  |
| C | -2.54187200 | 3.01932600  | -1.04416400 |
| C | -2.42613300 | 3.81220500  | 1.24949900  |
| C | -3.59772500 | 3.88190600  | -1.27458000 |
| H | -2.18426600 | 2.37958500  | -1.84132900 |
| C | -3.48123100 | 4.66817100  | 1.00499300  |
| H | -1.96943400 | 3.78106400  | 2.23258500  |
| C | -4.07723600 | 4.71148500  | -0.25867300 |
| H | -4.05642300 | 3.91284500  | -2.25616600 |
| H | -3.84895800 | 5.30897600  | 1.79807600  |
| H | -4.90510800 | 5.38384700  | -0.44819600 |
| O | 7.34251800  | 0.59997800  | -0.06150100 |
| C | 8.24283600  | -0.08850000 | -0.91989300 |
| H | 7.93935700  | 0.00011200  | -1.96711100 |
| H | 9.20933700  | 0.39097300  | -0.78224400 |



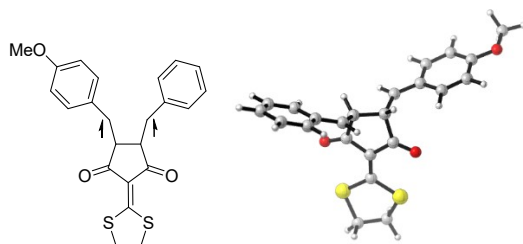

### INTb-1

SCF Done: E(UB3LYP) = -1910.83538196 A.U.

Zero-point correction= 0.369111 (Hartree/Particle)

Sum of electronic and thermal Free Energies= -1910.526444

|   |             |             |             |
|---|-------------|-------------|-------------|
| C | -2.78610000 | -4.75084300 | -0.20054900 |
| C | -1.37858100 | -5.17757200 | 0.15457400  |
| C | -1.34785600 | -2.53088800 | -0.01145600 |
| H | -3.24148200 | -5.41554800 | -0.93556200 |
| H | -3.42715900 | -4.69808200 | 0.68016200  |
| H | -0.81392500 | -5.48190700 | -0.72743400 |
| H | -1.36928400 | -5.98887600 | 0.88337100  |
| S | -2.70985500 | -3.07790500 | -0.96179600 |
| S | -0.51678600 | -3.74864800 | 0.92896000  |
| C | -0.95300500 | -1.21794100 | -0.00296200 |
| C | -1.60437200 | -0.14344000 | -0.74011400 |
| C | 0.17419800  | -0.68619600 | 0.75270300  |
| C | -0.97368300 | 1.20246100  | -0.28646700 |
| C | 0.38734300  | 0.78972900  | 0.32373400  |
| H | -0.85142800 | 1.83711500  | -1.16724300 |
| H | 0.63179300  | 1.37586400  | 1.21307300  |
| O | 0.85077600  | -1.28455500 | 1.56885900  |
| O | -2.49635000 | -0.25718800 | -1.55977400 |
| C | 1.50029300  | 0.84633700  | -0.67659200 |
| H | 1.21421400  | 0.84929900  | -1.72342900 |
| C | -1.87555900 | 1.85135300  | 0.71589500  |
| H | -1.64726600 | 1.67372200  | 1.76205700  |
| C | 2.87700200  | 0.85266200  | -0.37959500 |
| C | 3.82749200  | 0.95611900  | -1.42861000 |
| C | 3.39775100  | 0.77553300  | 0.94412900  |
| C | 5.18853000  | 0.99962000  | -1.18890300 |
| H | 3.47137300  | 1.00965300  | -2.45148000 |
| C | 4.75098100  | 0.81752800  | 1.18409500  |
| H | 2.72035700  | 0.64914600  | 1.77748800  |
| C | 5.66436800  | 0.93419900  | 0.12580900  |
| H | 5.87023400  | 1.08420800  | -2.02382600 |
| H | 5.13865300  | 0.75206800  | 2.19332900  |
| C | -3.01018900 | 2.63785500  | 0.42627600  |
| C | -3.47086700 | 2.88854200  | -0.89454600 |
| C | -3.74005200 | 3.23156200  | 1.49362900  |

|   |             |            |             |
|---|-------------|------------|-------------|
| C | -4.57515600 | 3.68973100 | -1.11949600 |
| H | -2.97121900 | 2.42103600 | -1.73202900 |
| C | -4.84010400 | 4.02989400 | 1.25469400  |
| H | -3.41321700 | 3.05117600 | 2.51182200  |
| C | -5.26710300 | 4.26964800 | -0.05454500 |
| H | -4.91042900 | 3.86141300 | -2.13584000 |
| H | -5.37494100 | 4.47209500 | 2.08729800  |
| H | -6.13118600 | 4.89571200 | -0.24082400 |
| O | 6.97961900  | 0.96932200 | 0.47755300  |
| C | 7.95427900  | 1.08574400 | -0.54929800 |
| H | 7.82862000  | 2.01463500 | -1.11359700 |
| H | 8.91797200  | 1.09781200 | -0.04478400 |
| H | 7.91456100  | 0.23384400 | -1.23470100 |

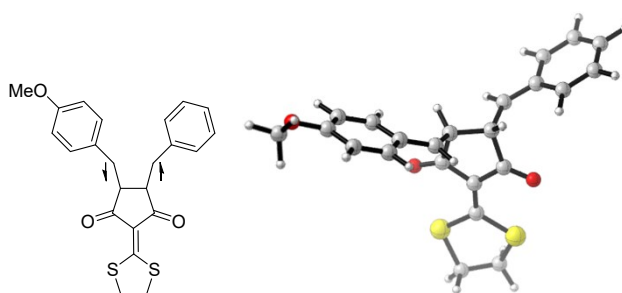

### INTb-1-OSS

SCF Done: E(UB3LYP) = -1910.83707966 A.U.

Zero-point correction= 0.369148 (Hartree/Particle)

Sum of electronic and thermal Free Energies= -1910.527658

|   |             |             |             |
|---|-------------|-------------|-------------|
| C | 3.12527600  | 4.67514200  | -0.20118600 |
| C | 1.74780500  | 5.19032800  | 0.15500900  |
| C | 1.54776100  | 2.55116000  | -0.01331700 |
| H | 3.62209800  | 5.31057300  | -0.93527200 |
| H | 3.76162400  | 4.58054300  | 0.67944500  |
| H | 1.20300300  | 5.52919000  | -0.72689600 |
| H | 1.79057000  | 6.00122700  | 0.88312000  |
| S | 2.94127200  | 3.01208600  | -0.96546000 |
| S | 0.79925900  | 3.81943900  | 0.93171800  |
| C | 1.06864400  | 1.26750800  | -0.00678300 |
| C | 1.63900000  | 0.15660300  | -0.75831600 |
| C | -0.08248200 | 0.80647600  | 0.75962800  |
| C | 0.92929700  | -1.14863500 | -0.30228200 |
| C | -0.39923300 | -0.64939700 | 0.32434900  |
| H | 0.75744100  | -1.77424800 | -1.18079200 |
| H | -0.67432800 | -1.22478500 | 1.21178700  |
| O | -0.71246400 | 1.43991600  | 1.58609300  |
| O | 2.52743300  | 0.21325300  | -1.58730100 |
| C | -1.50872800 | -0.62674600 | -0.66976200 |
| H | -1.22510800 | -0.53599900 | -1.71355100 |

|   |             |             |             |
|---|-------------|-------------|-------------|
| C | 1.78552400  | -1.84605600 | 0.69627100  |
| H | 1.66635400  | -1.54410100 | 1.73225300  |
| C | -2.88645300 | -0.66000600 | -0.37198800 |
| C | -3.83788000 | -0.68655700 | -1.42371400 |
| C | -3.40465100 | -0.67422500 | 0.95392200  |
| C | -5.19892900 | -0.74199500 | -1.18575700 |
| H | -3.48319900 | -0.66919100 | -2.44830200 |
| C | -4.75761600 | -0.72865300 | 1.19334500  |
| H | -2.72638400 | -0.61003500 | 1.79384400  |
| C | -5.67273800 | -0.76761900 | 0.13097100  |
| H | -5.88192700 | -0.76470900 | -2.02351400 |
| H | -5.14358300 | -0.73171900 | 2.20529200  |
| C | 2.76728700  | -2.82207200 | 0.41633400  |
| C | 3.10201900  | -3.23895800 | -0.89950600 |
| C | 3.46672300  | -3.43806800 | 1.49039600  |
| C | 4.05858000  | -4.21454600 | -1.11315200 |
| H | 2.62380000  | -2.76912200 | -1.74839000 |
| C | 4.41876800  | -4.41156500 | 1.26386000  |
| H | 3.23565700  | -3.13310300 | 2.50511800  |
| C | 4.72238300  | -4.81182200 | -0.04023100 |
| H | 4.29961800  | -4.51137000 | -2.12736200 |
| H | 4.93309300  | -4.86620600 | 2.10263600  |
| H | 5.47060300  | -5.57474300 | -0.21730900 |
| O | -6.98699300 | -0.82203200 | 0.48160800  |
| C | -7.96481800 | -0.85753800 | -0.54855300 |
| H | -7.84605100 | -1.74339100 | -1.17953200 |
| H | -8.92725600 | -0.90096300 | -0.04344700 |
| H | -7.92156700 | 0.04210200  | -1.16968000 |

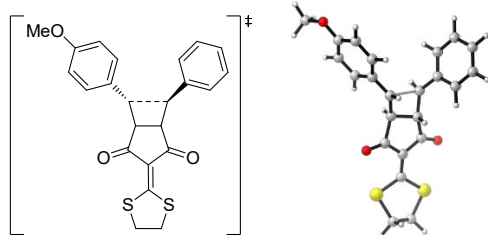

**TS2b-1**

SCF Done: E(UB3LYP) = -1910.80688136 A.U.

Zero-point correction= 0.370989 (Hartree/Particle)

Sum of electronic and thermal Free Energies= -1910.492478

|   |            |             |             |
|---|------------|-------------|-------------|
| C | 6.14365700 | -1.49155500 | 0.85764700  |
| C | 6.56708900 | -0.59463500 | -0.29452200 |
| C | 3.89565300 | -0.59219100 | -0.13574300 |
| H | 6.81168700 | -2.34538100 | 0.97894500  |
| H | 6.08513600 | -0.93853000 | 1.79579400  |
| H | 6.86392800 | -1.18579700 | -1.16106400 |
| H | 7.39149800 | 0.06227400  | -0.01152900 |

|   |             |             |             |
|---|-------------|-------------|-------------|
| S | 4.47775900  | -2.14202800 | 0.44667100  |
| S | 5.15051700  | 0.48415800  | -0.77365900 |
| C | 2.53130200  | -0.20275000 | -0.04805700 |
| C | 1.51695500  | -0.98292800 | 0.58012900  |
| C | 1.97970400  | 0.99054200  | -0.68168100 |
| C | 0.15203900  | -0.36210400 | 0.06271000  |
| C | 0.54287600  | 1.09428200  | -0.11768400 |
| H | 0.02134300  | -0.81362300 | -0.92468600 |
| H | 0.69173200  | 1.52839800  | 0.87620900  |
| O | 2.52176200  | 1.79786700  | -1.41650100 |
| O | 1.55181400  | -2.02508700 | 1.23420900  |
| C | -0.82978900 | 1.47630700  | -0.57878600 |
| H | -1.14519800 | 1.03219000  | -1.51764900 |
| C | -1.19608200 | -0.08460100 | 0.63534100  |
| H | -1.19357000 | 0.46934200  | 1.56970300  |
| C | -1.53662700 | 2.70395100  | -0.22694300 |
| C | -1.01107900 | 3.65844900  | 0.65876200  |
| C | -2.80249300 | 2.94369100  | -0.79036700 |
| C | -1.72397100 | 4.80924900  | 0.96236800  |
| H | -0.03060700 | 3.51317400  | 1.09423700  |
| C | -3.51464300 | 4.09180000  | -0.48101700 |
| H | -3.22025900 | 2.21877700  | -1.47983200 |
| C | -2.97852200 | 5.02923600  | 0.39894700  |
| H | -1.29693500 | 5.54207600  | 1.63634800  |
| H | -4.48629600 | 4.26121100  | -0.92930800 |
| H | -3.53216900 | 5.92880700  | 0.63932700  |
| C | -2.39455600 | -0.87261800 | 0.41655500  |
| C | -3.57085900 | -0.55615800 | 1.12833700  |
| C | -2.45357900 | -1.94401900 | -0.48709800 |
| C | -4.73619400 | -1.26698900 | 0.94607000  |
| H | -3.55424100 | 0.26387200  | 1.83719900  |
| C | -3.61792800 | -2.67323400 | -0.67502900 |
| H | -1.57028600 | -2.23339600 | -1.04221600 |
| C | -4.77163500 | -2.33619700 | 0.04024000  |
| H | -5.63580400 | -1.02440100 | 1.49732200  |
| H | -3.61614300 | -3.50149100 | -1.36924000 |
| O | -5.95911800 | -2.97831500 | -0.06826600 |
| C | -6.06193200 | -4.08682700 | -0.95724800 |
| H | -7.08719100 | -4.43855400 | -0.87213300 |

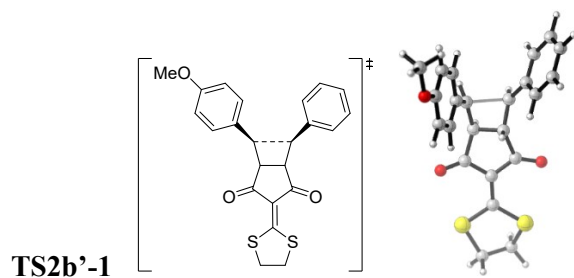

SCF Done: E(UB3LYP) = -1910.80187820 A.U.

Zero-point correction= 0.371008 (Hartree/Particle)

Sum of electronic and thermal Free Energies= -1910.487380

|   |             |             |             |
|---|-------------|-------------|-------------|
| C | -6.25103300 | -1.19886300 | -0.48510100 |
| C | -6.31942100 | 0.31599300  | -0.59585100 |
| C | -3.79031500 | -0.20012700 | -0.16234500 |
| H | -7.05096800 | -1.59400800 | 0.14359800  |
| H | -6.30780800 | -1.66487700 | -1.46896700 |
| H | -6.51225700 | 0.78018900  | 0.37194800  |
| H | -7.07570200 | 0.63990300  | -1.31217100 |
| S | -4.65420600 | -1.67573000 | 0.30281300  |
| S | -4.68864500 | 0.88135100  | -1.21615000 |
| C | -2.47667800 | 0.08903200  | 0.29269200  |
| C | -1.63340800 | -0.85916300 | 1.01866700  |
| C | -1.79010300 | 1.30464200  | 0.03256900  |
| C | -0.44248500 | -0.01669900 | 1.51591200  |
| C | -0.26621700 | 1.00296200  | 0.40218800  |
| H | -0.83871200 | 0.49845300  | 2.39571800  |
| H | 0.11248100  | 0.49573700  | -0.48735600 |
| O | -2.11443100 | 2.35641000  | -0.52240000 |
| O | -1.84113200 | -2.03551900 | 1.26494100  |
| C | 0.86005400  | 1.74303200  | 1.03011100  |
| H | 0.62306700  | 2.21986000  | 1.97749100  |
| C | 1.05202800  | -0.12587700 | 1.72836700  |
| C | 1.96793200  | 2.37132000  | 0.32120100  |
| C | 2.82098700  | 3.24052600  | 1.02424800  |
| C | 2.23342000  | 2.13877200  | -1.03782200 |
| C | 3.89061000  | 3.85789700  | 0.39554300  |
| H | 2.62655700  | 3.43743900  | 2.07305900  |
| C | 3.30163400  | 2.76164700  | -1.66712000 |
| H | 1.59476700  | 1.48014700  | -1.61166500 |
| C | 4.13476800  | 3.62058100  | -0.95544800 |
| H | 4.53032300  | 4.53099300  | 0.95367200  |
| H | 3.48351000  | 2.57960900  | -2.71946100 |
| C | 1.95262300  | -0.96226600 | 0.94881200  |
| C | 3.33328300  | -0.89254900 | 1.18582600  |
| C | 1.50269900  | -1.86681900 | -0.03249500 |

|   |            |             |             |
|---|------------|-------------|-------------|
| C | 4.23752300 | -1.67125400 | 0.48104900  |
| H | 3.70799700 | -0.20898000 | 1.93938600  |
| C | 2.39210300 | -2.65009100 | -0.73857600 |
| H | 0.44230600 | -1.99039300 | -0.20924000 |
| C | 3.76812900 | -2.55669600 | -0.49406200 |
| H | 5.29310800 | -1.58515100 | 0.69567000  |
| H | 2.04424600 | -3.35904300 | -1.47910200 |
| H | 1.39563200 | 0.07035700  | 2.73987300  |
| H | 4.96651900 | 4.10617300  | -1.45152900 |
| O | 4.55732300 | -3.36616000 | -1.24219100 |
| C | 5.96504500 | -3.33522600 | -1.03361300 |
| H | 6.38267300 | -4.05738100 | -1.73108800 |

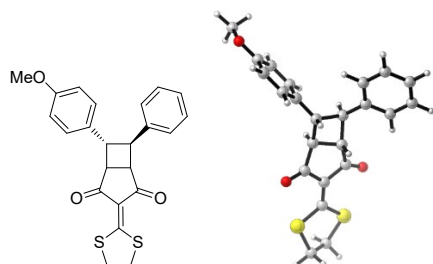

**3ac**

SCF Done: E(UB3LYP) = -1910.84491666 A.U.

Zero-point correction= 0.373285 (Hartree/Particle)

Sum of electronic and thermal Free Energies= -1910.529587

|   |             |             |             |
|---|-------------|-------------|-------------|
| C | 6.19025100  | -1.61815100 | 0.61835000  |
| C | 6.33056600  | -1.00278100 | -0.75631500 |
| C | 3.80103900  | -0.63446900 | -0.01611700 |
| H | 6.72993300  | -2.56246500 | 0.69981500  |
| H | 6.53571300  | -0.94084900 | 1.40008600  |
| H | 6.25169900  | -1.75297500 | -1.54387700 |
| H | 7.27286100  | -0.46503500 | -0.86857200 |
| S | 4.41411300  | -1.98586300 | 0.91981000  |
| S | 4.98087700  | 0.22349700  | -0.99149300 |
| C | 2.48430500  | -0.27132700 | 0.01244700  |
| C | 1.41609200  | -1.03030200 | 0.73595500  |
| C | 1.93011900  | 0.93826700  | -0.66726100 |
| C | 0.14871000  | -0.40538200 | 0.17466000  |
| C | 0.54729400  | 1.04524100  | -0.05026800 |
| H | 0.04054100  | -0.86926500 | -0.81594000 |
| H | 0.73222600  | 1.48465800  | 0.94101700  |
| O | 2.51156600  | 1.66405100  | -1.44777400 |
| O | 1.58024400  | -1.95027600 | 1.50868900  |
| C | -0.94227500 | 1.34831900  | -0.37241500 |
| H | -1.16870100 | 1.07213700  | -1.40691800 |
| C | -1.27516200 | 0.10063900  | 0.56821700  |
| H | -1.27173500 | 0.45129100  | 1.60278600  |

|   |             |             |             |
|---|-------------|-------------|-------------|
| C | -1.50230500 | 2.70877200  | -0.06060500 |
| C | -0.71277200 | 3.84894300  | -0.22696300 |
| C | -2.82241900 | 2.86601100  | 0.36913200  |
| C | -1.22907400 | 5.11496100  | 0.02905300  |
| H | 0.31242200  | 3.74469800  | -0.56608300 |
| C | -3.33862000 | 4.13149200  | 0.62797400  |
| H | -3.45267400 | 1.99431800  | 0.50159900  |
| C | -2.54402000 | 5.26075400  | 0.45857900  |
| H | -0.60137600 | 5.98802200  | -0.10641100 |
| H | -4.36399500 | 4.23428300  | 0.96379200  |
| H | -2.94592100 | 6.24633600  | 0.66151000  |
| C | -2.48181600 | -0.76178400 | 0.32887300  |
| C | -3.28206700 | -1.16431900 | 1.40481800  |
| C | -2.84526100 | -1.20507400 | -0.94105800 |
| C | -4.39150700 | -1.97182200 | 1.22288400  |
| H | -3.02611800 | -0.83998600 | 2.40765300  |
| C | -3.95792700 | -2.01746200 | -1.14588300 |
| H | -2.25923100 | -0.91677200 | -1.80669600 |
| C | -4.73917300 | -2.40576800 | -0.05791300 |
| H | -5.00377800 | -2.27984800 | 2.06127300  |
| H | -4.20212700 | -2.33493400 | -2.14989000 |
| O | -5.84867700 | -3.19494600 | -0.14092200 |
| C | -6.24358000 | -3.67267700 | -1.41853100 |
| H | -7.13337600 | -4.27523800 | -1.24909100 |
| H | -6.48851600 | -2.84809400 | -2.09506700 |

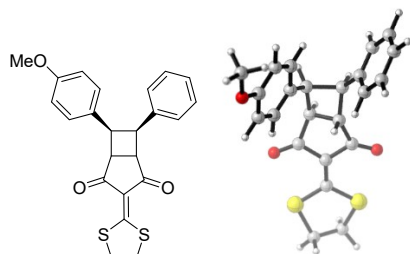

**3ad**

SCF Done: E(UB3LYP) = -1910.83872257 A.U.

Zero-point correction= 0.373627 (Hartree/Particle)

Sum of electronic and thermal Free Energies= -1910.522464

|   |             |             |             |
|---|-------------|-------------|-------------|
| C | -6.02870000 | -1.37812200 | -0.84579500 |
| C | -6.36418200 | 0.08846900  | -0.69238600 |
| C | -3.78707400 | -0.16376400 | -0.08440900 |
| H | -6.82222800 | -2.02126900 | -0.46322700 |
| H | -5.82722000 | -1.63948900 | -1.88519400 |
| H | -6.82471400 | 0.29758200  | 0.27375500  |
| H | -7.02339100 | 0.44205300  | -1.48619000 |
| S | -4.52027600 | -1.74135500 | 0.14176800  |
| S | -4.80932700 | 1.06282900  | -0.81087000 |

|   |             |             |             |
|---|-------------|-------------|-------------|
| C | -2.49680700 | 0.09679200  | 0.28387500  |
| C | -1.62255600 | -0.86947000 | 1.01220800  |
| C | -1.79109500 | 1.38584300  | 0.01557100  |
| C | -0.46422500 | 0.01571600  | 1.45489700  |
| C | -0.34835600 | 1.03650500  | 0.33346600  |
| H | -0.89094200 | 0.54279800  | 2.32027800  |
| H | 0.00181400  | 0.48932000  | -0.55102600 |
| O | -2.28865800 | 2.40586700  | -0.41424100 |
| O | -1.87244800 | -2.03560400 | 1.23989900  |
| C | 0.90477900  | 1.61071700  | 1.03660800  |
| H | 0.59854400  | 2.24832500  | 1.86882200  |
| C | 1.08302500  | 0.11254700  | 1.66191900  |
| C | 2.00180000  | 2.29612400  | 0.27717700  |
| C | 2.77749200  | 3.26177300  | 0.92711500  |
| C | 2.29515300  | 2.00773400  | -1.05771600 |
| C | 3.81455100  | 3.91461700  | 0.27133100  |
| H | 2.55869800  | 3.51087200  | 1.96035400  |
| C | 3.32806000  | 2.66232300  | -1.71988800 |
| H | 1.71495700  | 1.26790600  | -1.59459500 |
| C | 4.09371900  | 3.61622600  | -1.05837600 |
| H | 4.39780500  | 4.66267000  | 0.79560700  |
| H | 3.53338300  | 2.42602200  | -2.75738800 |
| C | 1.99132900  | -0.83570900 | 0.92533900  |
| C | 3.37128000  | -0.62996400 | 0.95909400  |
| C | 1.52349900  | -1.95945200 | 0.23555200  |
| C | 4.25983200  | -1.48976400 | 0.32158200  |
| H | 3.77235800  | 0.22445900  | 1.49210600  |
| C | 2.39474600  | -2.82486800 | -0.40826900 |
| H | 0.46621600  | -2.18908400 | 0.22310700  |
| C | 3.76982300  | -2.59487000 | -0.37442900 |
| H | 5.32025800  | -1.28680400 | 0.37463900  |
| H | 2.02435500  | -3.69599800 | -0.93423000 |
| H | 1.37071700  | 0.14853100  | 2.71367100  |
| H | 4.89620600  | 4.12786000  | -1.57640900 |
| O | 4.54657400  | -3.50116500 | -1.03779300 |
| C | 5.95447200  | -3.32143700 | -1.02156000 |
| H | 6.36689000  | -4.14456600 | -1.60138500 |
| H | 6.24189500  | -2.37259800 | -1.48509800 |

### 5.2.3 Computational analysis of 1a-OMe'



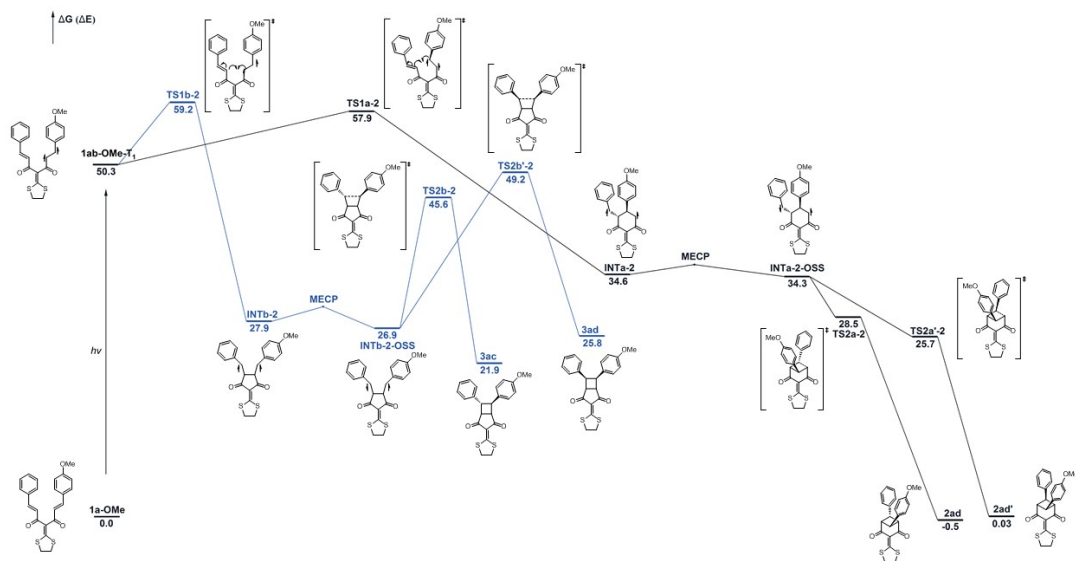

## 5.2.4 Cartesian coordinates and energies of all optimized structures

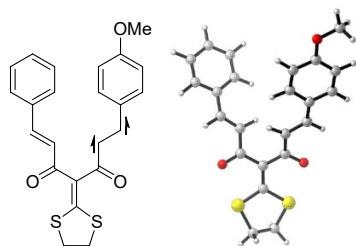

**1ab-OMe-T<sub>1</sub>**

SCF Done: E(UB3LYP) = -1910.79978774 A.U.

Zero-point correction= 0.367504 (Hartree/Particle)

Sum of electronic and thermal Free Energies= -1910.494488

|   |             |             |             |
|---|-------------|-------------|-------------|
| C | 6.06470500  | -1.81534800 | 0.56727800  |
| C | 6.26450400  | -1.09294500 | -0.74111000 |
| C | 3.70659400  | -0.74039400 | -0.05589100 |
| H | 6.59075100  | -2.77092600 | 0.60010000  |
| H | 6.38258400  | -1.20616500 | 1.41513300  |
| H | 6.20810500  | -1.77606200 | -1.59023800 |
| H | 7.21405000  | -0.55645600 | -0.77968800 |
| S | 4.27207900  | -2.18582100 | 0.77251600  |
| S | 4.93256100  | 0.16412600  | -0.93401500 |
| C | 2.38171300  | -0.34113400 | -0.01421100 |
| C | 2.05581900  | 1.02791200  | -0.45675300 |
| C | 1.36787100  | -1.29255800 | 0.48770300  |
| O | 1.70454000  | -2.29354000 | 1.16892300  |
| O | 2.81632400  | 1.65750900  | -1.19529400 |
| C | 0.85421700  | 1.69291000  | 0.10986800  |
| H | 0.36774200  | 1.22146400  | 0.95374100  |
| C | 0.00675200  | -1.17277700 | 0.05607800  |
| H | -0.23948400 | -0.43306800 | -0.69180500 |

|   |             |             |             |
|---|-------------|-------------|-------------|
| C | 0.42303800  | 2.86596700  | -0.38122900 |
| H | 0.97795500  | 3.26930200  | -1.22381200 |
| C | -1.01181800 | -2.08852200 | 0.52154900  |
| H | -0.68000700 | -2.84921700 | 1.21650000  |
| C | -0.70409100 | 3.66834900  | 0.08490300  |
| C | -0.99584200 | 4.86777400  | -0.58180100 |
| C | -1.51639500 | 3.30324000  | 1.17126000  |
| C | -2.05442600 | 5.67355700  | -0.18296400 |
| H | -0.37786400 | 5.16568400  | -1.42136900 |
| C | -2.57264000 | 4.10707900  | 1.56941100  |
| H | -1.32001300 | 2.38432400  | 1.70958400  |
| C | -2.84752900 | 5.29613900  | 0.89491000  |
| H | -2.25908800 | 6.59639500  | -0.71260500 |
| H | -3.18694000 | 3.80813400  | 2.41055300  |
| H | -3.67380100 | 5.92196300  | 1.21033100  |
| C | -2.34718900 | -2.05284300 | 0.15029300  |
| C | -3.26938000 | -3.01864000 | 0.69113100  |
| C | -2.91004500 | -1.08785000 | -0.76414700 |
| C | -4.60020900 | -3.02578900 | 0.36311700  |
| H | -2.88525000 | -3.76185600 | 1.37964700  |
| C | -4.23831200 | -1.09919700 | -1.08489800 |
| H | -2.27345000 | -0.33443900 | -1.20724500 |
| C | -5.10919400 | -2.06223400 | -0.53286500 |
| H | -5.24968200 | -3.77401400 | 0.79640100  |
| H | -4.65265300 | -0.37017900 | -1.77050500 |
| O | -6.40303000 | -1.97840600 | -0.92355700 |
| C | -7.34281600 | -2.91811900 | -0.41063500 |
| H | -7.41991900 | -2.84486900 | 0.67735800  |
| H | -8.29735100 | -2.65568300 | -0.86029800 |
| H | -7.07455100 | -3.93916800 | -0.69434800 |

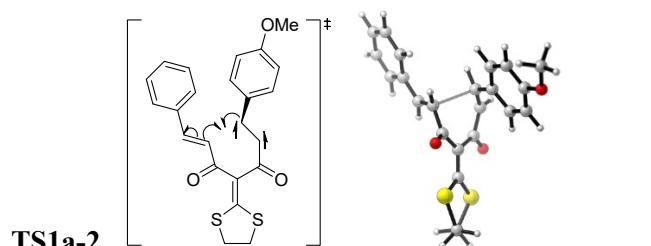

SCF Done: E(UB3LYP) = -1910.78758543 A.U.

Zero-point correction= 0.367052 (Hartree/Particle)

Sum of electronic and thermal Free Energies= -1910.479882

|   |             |             |             |
|---|-------------|-------------|-------------|
| C | -4.08419400 | -3.16189700 | -1.28792300 |
| C | -3.66656900 | -4.12346500 | -0.20350400 |
| C | -1.91721100 | -2.11913400 | -0.12359200 |
| H | -4.38676200 | -3.67348200 | -2.20288300 |

|   |             |             |             |
|---|-------------|-------------|-------------|
| H | -4.89627800 | -2.51137000 | -0.95956300 |
| H | -3.06385200 | -4.94147000 | -0.60128900 |
| H | -4.52051300 | -4.54009600 | 0.33300700  |
| S | -2.64670100 | -2.09634500 | -1.72090000 |
| S | -2.64923400 | -3.21668100 | 1.03647300  |
| C | -0.83237500 | -1.32526900 | 0.19849500  |
| C | -0.42622400 | -1.19553900 | 1.61047400  |
| C | -0.12353300 | -0.60470800 | -0.87036500 |
| C | 0.42472700  | -0.10185600 | 2.02049600  |
| C | 1.29631700  | -0.21464100 | -0.65200500 |
| C | 0.87346000  | 1.02284300  | 1.20233500  |
| H | 0.70022800  | -0.13319700 | 3.07214600  |
| O | -0.89724400 | -1.94541300 | 2.48676000  |
| O | -0.63685400 | -0.37214000 | -1.96039000 |
| C | 2.23384100  | -1.15038700 | -0.27385600 |
| H | 1.87837500  | -2.09066900 | 0.13509400  |
| C | 3.67064600  | -0.99530800 | -0.32045400 |
| C | 4.48682300  | -2.04287600 | 0.15044200  |
| C | 4.31119800  | 0.16066300  | -0.81067000 |
| C | 5.86898300  | -1.94245900 | 0.13440800  |
| H | 4.01652100  | -2.94211600 | 0.53264900  |
| C | 5.69335800  | 0.25794100  | -0.82452500 |
| H | 3.72132300  | 0.98440200  | -1.19294500 |
| C | 6.48205400  | -0.79040700 | -0.35266300 |
| H | 6.47221800  | -2.76378200 | 0.50299100  |
| H | 6.16297000  | 1.15585600  | -1.20908600 |
| H | 1.59308200  | 0.64203800  | -1.24461500 |
| C | 0.03321900  | 2.14153600  | 0.85912700  |
| C | -1.37580300 | 2.12109400  | 0.98991000  |
| C | 0.61135200  | 3.32280200  | 0.35240300  |
| C | -2.14394800 | 3.20765100  | 0.63459900  |
| H | -1.86443700 | 1.23918300  | 1.38358700  |
| C | -0.15410000 | 4.41836700  | -0.01187200 |
| H | 1.68951100  | 3.37797400  | 0.24810200  |
| C | -1.54488100 | 4.36709400  | 0.12540900  |
| H | -3.22146300 | 3.18668700  | 0.73966000  |
| H | 0.33546600  | 5.30232500  | -0.39594800 |
| H | 1.92748800  | 1.26403500  | 1.30494200  |
| H | 7.56218900  | -0.70980800 | -0.36667100 |
| O | -2.39239300 | 5.37940400  | -0.20036100 |
| C | -1.84663200 | 6.57873700  | -0.73356900 |
| H | -1.31326500 | 6.39023200  | -1.66979500 |
| H | -2.69541500 | 7.23094500  | -0.92646300 |

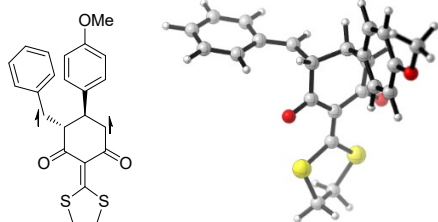

**INTa-2**

SCF Done: E(UB3LYP) = -1910.82478590 A.U.

Zero-point correction= 0.370094 (Hartree/Particle)

Sum of electronic and thermal Free Energies= -1910.513473

|   |             |             |             |
|---|-------------|-------------|-------------|
| C | 3.30031700  | -3.65874000 | -1.66930000 |
| C | 3.78875600  | -3.92460900 | -0.26715500 |
| C | 1.90263200  | -2.05803700 | -0.06244700 |
| H | 4.11398800  | -3.63548900 | -2.39577900 |
| H | 2.56097300  | -4.39581500 | -1.98655800 |
| H | 4.70162600  | -3.36964300 | -0.04495000 |
| H | 3.96394100  | -4.98568800 | -0.08302900 |
| S | 2.50685500  | -1.99722000 | -1.70705400 |
| S | 2.48639100  | -3.38721900 | 0.92123700  |
| C | 1.01935200  | -1.11487200 | 0.43305100  |
| C | 0.42241600  | -1.29478200 | 1.76685900  |
| C | 0.65974400  | 0.04825200  | -0.37637200 |
| C | -0.62043700 | -0.39728400 | 2.17512100  |
| C | -0.12879700 | 1.19031000  | 0.29620600  |
| C | -1.17573400 | 0.69026700  | 1.32416900  |
| H | -1.07437400 | -0.60801600 | 3.13635600  |
| O | 0.75547500  | -2.24190300 | 2.50433100  |
| O | 1.03492300  | 0.18549500  | -1.53397500 |
| C | 0.85419200  | 2.10661700  | 0.96192500  |
| H | 1.03285200  | 1.93879800  | 2.01946300  |
| C | 1.58812900  | 3.13888000  | 0.33920400  |
| C | 2.45407000  | 3.94884100  | 1.12571300  |
| C | 1.50516300  | 3.43190800  | -1.04904200 |
| C | 3.17210700  | 4.98616600  | 0.56623200  |
| H | 2.54175400  | 3.74032300  | 2.18631500  |
| C | 2.23074300  | 4.47414900  | -1.59614200 |
| H | 0.89098600  | 2.81412500  | -1.68974700 |
| C | 3.06533100  | 5.26079800  | -0.80002800 |
| H | 3.82234800  | 5.58856400  | 1.18992100  |
| H | 2.15451400  | 4.67576500  | -2.65834900 |
| H | -0.63866500 | 1.70865000  | -0.51733000 |
| C | -2.50389300 | 0.27654100  | 0.68488100  |
| C | -2.63042400 | -0.88324000 | -0.09102300 |
| C | -3.63498900 | 1.06758200  | 0.85753400  |
| C | -3.83463700 | -1.22203800 | -0.68075700 |

|   |             |             |             |
|---|-------------|-------------|-------------|
| H | -1.77880800 | -1.53614000 | -0.23913000 |
| C | -4.85759100 | 0.73973200  | 0.27352100  |
| H | -3.57093100 | 1.96823900  | 1.45878800  |
| C | -4.96031300 | -0.41247400 | -0.50323400 |
| H | -3.92820600 | -2.11702600 | -1.28299000 |
| H | -5.70948200 | 1.38572500  | 0.43272700  |
| H | -1.41233100 | 1.53815700  | 1.97725400  |
| H | 3.63038800  | 6.07415900  | -1.23876200 |
| O | -6.09957100 | -0.83310300 | -1.12208600 |
| C | -7.27519300 | -0.04920100 | -0.97819800 |
| H | -7.13534800 | 0.95694300  | -1.38502600 |
| H | -8.04725700 | -0.56342300 | -1.54637100 |
| H | -7.58218500 | 0.02029600  | 0.06980700  |

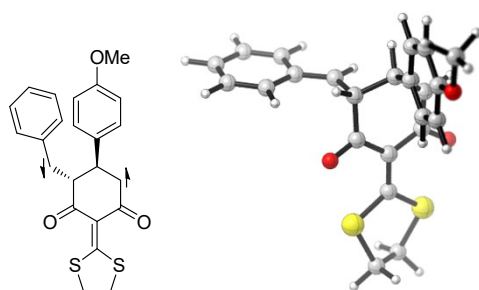

### INTa-2-OSS

SCF Done: E(UB3LYP) = -1910.82529479 A.U.

Zero-point correction= 0.370094 (Hartree/Particle)

Sum of electronic and thermal Free Energies= -1910.513473

|   |             |             |             |
|---|-------------|-------------|-------------|
| C | -3.34628900 | 3.62622200  | -1.67565300 |
| C | -3.84520600 | 3.87322500  | -0.27375700 |
| C | -1.92361900 | 2.04591800  | -0.07195500 |
| H | -4.15671300 | 3.58912800  | -2.40514900 |
| H | -2.62218700 | 4.38107200  | -1.98631100 |
| H | -4.74596000 | 3.29647600  | -0.05757600 |
| H | -4.04476300 | 4.92897700  | -0.08399000 |
| S | -2.51524300 | 1.98301500  | -1.72008700 |
| S | -2.53491700 | 3.35783100  | 0.91616800  |
| C | -1.02869600 | 1.11318800  | 0.42496900  |
| C | -0.43517300 | 1.30463900  | 1.75837100  |
| C | -0.65195000 | -0.04332900 | -0.38787200 |
| C | 0.62209200  | 0.42456300  | 2.16579900  |
| C | 0.13205400  | -1.17958300 | 0.29522400  |
| C | 1.17680600  | -0.67205400 | 1.32160400  |
| H | 1.09045700  | 0.65561400  | 3.11534400  |
| O | -0.78161500 | 2.24967300  | 2.49334700  |
| O | -1.01396200 | -0.17793900 | -1.55003600 |
| C | -0.87832900 | -2.07325500 | 0.95260000  |
| H | -1.12207200 | -1.84957400 | 1.98675900  |

|   |             |             |             |
|---|-------------|-------------|-------------|
| C | -1.57183900 | -3.13873200 | 0.34073000  |
| C | -2.47628400 | -3.91730500 | 1.11613600  |
| C | -1.41711400 | -3.49331300 | -1.02704400 |
| C | -3.16188500 | -4.98159000 | 0.56686200  |
| H | -2.61954800 | -3.66239900 | 2.16042200  |
| C | -2.11259500 | -4.56061700 | -1.56477300 |
| H | -0.77128700 | -2.90341700 | -1.66289700 |
| C | -2.98532600 | -5.31557500 | -0.77888000 |
| H | -3.84193600 | -5.55875700 | 1.18263600  |
| H | -1.98189200 | -4.80752900 | -2.61203100 |
| H | 0.64527500  | -1.70934400 | -0.50779700 |
| C | 2.50428100  | -0.25540000 | 0.68518200  |
| C | 2.62666000  | 0.89970600  | -0.09867400 |
| C | 3.64058800  | -1.03678100 | 0.86965400  |
| C | 3.83153000  | 1.24347900  | -0.68406900 |
| H | 1.77085900  | 1.54484000  | -0.25652400 |
| C | 4.86374700  | -0.70395900 | 0.29027400  |
| H | 3.57971300  | -1.93373800 | 1.47676100  |
| C | 4.96220700  | 0.44373700  | -0.49406100 |
| H | 3.92180500  | 2.13448100  | -1.29266400 |
| H | 5.71957900  | -1.34238200 | 0.45851700  |
| H | 1.41336400  | -1.51428800 | 1.98050800  |
| H | -3.52571400 | -6.14957300 | -1.20980700 |
| O | 6.10166200  | 0.86823400  | -1.10936000 |
| C | 7.28306500  | 0.09561000  | -0.95142200 |
| H | 7.15478900  | -0.91466800 | -1.35168900 |
| H | 8.05454300  | 0.61234800  | -1.51808200 |

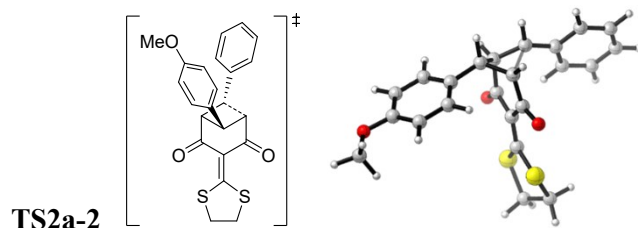

SCF Done: E(UB3LYP) = -1910.83456537 A.U.

Zero-point correction= 0.372129 (Hartree/Particle)

Sum of electronic and thermal Free Energies= -1910.517884

|   |             |            |             |
|---|-------------|------------|-------------|
| C | -0.67577500 | 4.44843900 | -0.68733900 |
| C | -1.29124300 | 4.27755000 | 0.68858400  |
| C | -0.46571400 | 1.87490600 | -0.01388700 |
| H | -1.28737200 | 5.08525400 | -1.32832900 |
| H | 0.32842500  | 4.86810600 | -0.62177800 |
| H | -2.36269600 | 4.08314100 | 0.63322300  |
| H | -1.10954900 | 5.13726800 | 1.33458300  |

|   |             |             |             |
|---|-------------|-------------|-------------|
| S | -0.58013600 | 2.79870200  | -1.50795200 |
| S | -0.46042300 | 2.83368600  | 1.46292100  |
| C | -0.42505100 | 0.48739700  | 0.04756100  |
| C | -0.46987300 | -0.22549100 | 1.28473300  |
| C | -0.41385000 | -0.34223500 | -1.16056600 |
| C | -0.28899600 | -1.65626200 | 1.25882800  |
| C | -0.43613200 | -1.85807300 | -0.93989600 |
| C | 0.61953900  | -2.19896600 | 0.15441500  |
| H | -0.36494100 | -2.15577100 | 2.21974700  |
| O | -0.57346400 | 0.33525600  | 2.43763200  |
| O | -0.40321800 | 0.12528100  | -2.28956900 |
| C | -1.61732700 | -2.34554000 | -0.09725900 |
| H | -1.50594800 | -3.39090500 | 0.18088500  |
| C | -2.99565000 | -1.92138100 | -0.12043700 |
| C | -3.92776300 | -2.65487700 | 0.65212800  |
| C | -3.47914900 | -0.80773800 | -0.83958500 |
| C | -5.25917600 | -2.29200000 | 0.71256500  |
| H | -3.58096600 | -3.51833300 | 1.20955300  |
| C | -4.81895700 | -0.45323200 | -0.78008400 |
| H | -2.81782700 | -0.23461600 | -1.47294900 |
| C | -5.71531500 | -1.18335800 | -0.00388600 |
| H | -5.94946500 | -2.87144400 | 1.31412900  |
| H | -5.16829700 | 0.39895400  | -1.35108200 |
| H | -0.32543200 | -2.34325800 | -1.91341200 |
| H | 0.65711500  | -3.28976800 | 0.24774500  |
| C | 2.03723300  | -1.68598400 | 0.02024300  |
| C | 2.73283200  | -1.85167100 | -1.18388300 |
| C | 2.71565000  | -1.10438500 | 1.08595700  |
| C | 4.04943100  | -1.44834100 | -1.31579700 |
| H | 2.23629500  | -2.29626500 | -2.03895400 |
| C | 4.04406000  | -0.69571300 | 0.97199600  |
| H | 2.20906000  | -0.95052900 | 2.03133400  |
| C | 4.71745800  | -0.86680700 | -0.23498600 |
| H | 4.58014700  | -1.56974300 | -2.25180900 |
| H | 4.53027900  | -0.24385900 | 1.82510500  |
| H | -6.75948600 | -0.89814100 | 0.03861600  |
| O | 6.01247200  | -0.50050900 | -0.46156100 |
| C | 6.73604800  | 0.10465000  | 0.59942800  |
| H | 6.82109100  | -0.56744300 | 1.45897800  |

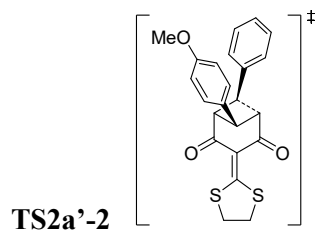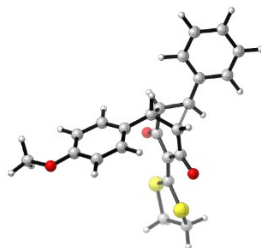

SCF Done: E(UB3LYP) = -1910.83891983 A.U.

Zero-point correction= 0.371941 (Hartree/Particle)

Sum of electronic and thermal Free Energies= -1910.522420

|   |             |             |             |
|---|-------------|-------------|-------------|
| C | -3.49209600 | -3.81481500 | -0.81069000 |
| C | -2.91881400 | -4.34227200 | 0.48966400  |
| C | -1.49431100 | -2.19571200 | -0.09512500 |
| H | -3.69474600 | -4.61792800 | -1.52086500 |
| H | -4.40898200 | -3.25023600 | -0.63883300 |
| H | -2.14844000 | -5.09466900 | 0.31788700  |
| H | -3.68768600 | -4.75241500 | 1.14554800  |
| S | -2.24793400 | -2.70676700 | -1.60148300 |
| S | -2.17353700 | -2.90973400 | 1.36424600  |
| C | -0.43436600 | -1.29913600 | -0.01975400 |
| C | 0.23303800  | -0.99357700 | 1.21069000  |
| C | 0.12644000  | -0.66527500 | -1.22078700 |
| C | 1.26038900  | 0.02276700  | 1.20351700  |
| C | 1.33609200  | 0.24393800  | -0.98854900 |
| C | 1.05352100  | 1.17687000  | 0.21997000  |
| H | 1.78198500  | 0.17330700  | 2.14402600  |
| O | -0.05775400 | -1.53056700 | 2.34015500  |
| O | -0.29609700 | -0.87467800 | -2.34656500 |
| C | 2.43810400  | -0.57365900 | -0.29963900 |
| H | 2.31261700  | -1.64986300 | -0.28455100 |
| C | 3.81661500  | -0.14713500 | -0.23416000 |
| C | 4.77544100  | -1.03368500 | 0.31165200  |
| C | 4.27322500  | 1.11750100  | -0.66894600 |
| C | 6.10472300  | -0.67221100 | 0.42795900  |
| H | 4.45189000  | -2.01366000 | 0.64436300  |
| C | 5.60746200  | 1.47102700  | -0.55575100 |
| H | 3.58127800  | 1.81688200  | -1.12073000 |
| C | 6.53185200  | 0.58534200  | -0.00189700 |
| H | 6.81707400  | -1.37104000 | 0.85035700  |
| H | 5.93461300  | 2.44269600  | -0.90679800 |
| H | 1.61270900  | 0.71195400  | -1.93546900 |
| H | 1.89703000  | 1.86265100  | 0.32970100  |
| C | -0.22858400 | 1.98017200  | 0.26957300  |
| C | -0.76743100 | 2.54500400  | -0.88198800 |



|   |             |            |             |
|---|-------------|------------|-------------|
| C | -0.87476100 | 2.23288300 | 1.48509500  |
| C | -1.91285400 | 3.33901600 | -0.84069300 |
| H | -0.30329200 | 2.36331500 | -1.84441500 |
| C | -2.01076700 | 3.02052600 | 1.54472600  |
| H | -0.49149400 | 1.79873600 | 2.40140700  |
| C | -2.54004900 | 3.58070800 | 0.37927500  |
| H | -2.30244600 | 3.74939600 | -1.76161900 |
| H | -2.51148400 | 3.20807100 | 2.48641000  |
| H | 7.57335000  | 0.86869200 | 0.08728800  |
| O | -3.66558500 | 4.33617800 | 0.53827700  |
| C | -4.25654800 | 4.91421600 | -0.61597600 |
| H | -5.13066400 | 5.45738800 | -0.26302500 |
| H | -3.57180000 | 5.61151400 | -1.10863200 |
| H | -4.57042400 | 4.14680400 | -1.33018100 |

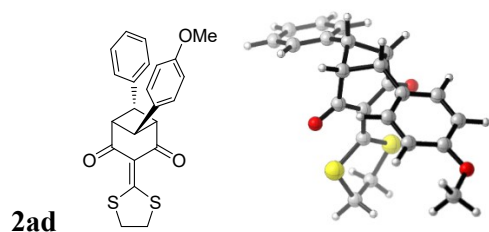

SCF Done: E(UB3LYP) = -1910.88074840 A.U.

Zero-point correction= 0.374336 (Hartree/Particle)

Sum of electronic and thermal Free Energies= -1910.562829

|   |             |             |             |
|---|-------------|-------------|-------------|
| C | 0.95571700  | 4.28714700  | -0.68465300 |
| C | 0.18383200  | 4.29973800  | 0.61300100  |
| C | 0.53752800  | 1.74514600  | -0.03035100 |
| H | 0.61428800  | 5.05897500  | -1.37590200 |
| H | 2.02753800  | 4.40472400  | -0.51887400 |
| H | -0.88462300 | 4.44373300  | 0.44624300  |
| H | 0.54453900  | 5.06581700  | 1.30087600  |
| S | 0.67346100  | 2.66701300  | -1.51247500 |
| S | 0.42457000  | 2.67670600  | 1.44787000  |
| C | 0.51991400  | 0.36744300  | -0.02733800 |
| C | 0.46441000  | -0.39918300 | 1.22040400  |
| C | 0.55280300  | -0.40460700 | -1.27282400 |
| C | 0.44249600  | -1.90787200 | 1.04413700  |
| C | 0.53715300  | -1.91203000 | -1.09120000 |
| C | 1.55069000  | -2.32959000 | 0.02216300  |
| H | 0.39655400  | -2.39509900 | 2.01604400  |
| O | 0.45858200  | 0.11800000  | 2.32962800  |
| O | 0.56840000  | 0.10876500  | -2.38348900 |
| C | -0.58193400 | -2.30409800 | -0.06733100 |
| H | -0.65509900 | -3.39668300 | -0.07208800 |

|   |             |             |             |
|---|-------------|-------------|-------------|
| C | -1.96595100 | -1.71142700 | -0.12453600 |
| C | -2.66885800 | -1.40985100 | 1.03804400  |
| C | -2.61326700 | -1.51082000 | -1.34956300 |
| C | -3.97508200 | -0.92481600 | 0.99823600  |
| H | -2.19702000 | -1.54223500 | 2.00489800  |
| C | -3.90959200 | -1.02956800 | -1.40747200 |
| H | -2.09285200 | -1.72422700 | -2.27626300 |
| C | -4.60255200 | -0.73422200 | -0.23092000 |
| H | -4.48072700 | -0.69699300 | 1.92599300  |
| H | -4.40403700 | -0.86928300 | -2.35745500 |
| H | 0.57086600  | -2.40393500 | -2.06119100 |
| H | 1.60199500  | -3.42320400 | 0.02851300  |
| C | 2.95076900  | -1.77442400 | 0.08170100  |
| C | 3.66716100  | -1.51643700 | -1.08918100 |
| C | 3.58282600  | -1.56860700 | 1.31024400  |
| C | 4.98190700  | -1.06612000 | -1.03358300 |
| H | 3.19373900  | -1.65810900 | -2.05389000 |
| C | 4.89724000  | -1.11836200 | 1.36744200  |
| H | 3.04201500  | -1.75101400 | 2.23173900  |
| C | 5.60232500  | -0.86675200 | 0.19507600  |
| H | 5.51974000  | -0.86645300 | -1.95301700 |
| H | 5.36852700  | -0.95946500 | 2.33029200  |
| H | 6.62555100  | -0.51296000 | 0.23869400  |
| O | -5.87428900 | -0.26249400 | -0.38902900 |
| C | -6.62324200 | 0.05406400  | 0.77457400  |
| H | -6.14202300 | 0.84676800  | 1.35580000  |
| H | -7.59093900 | 0.40351100  | 0.42073200  |
| H | -6.76583000 | -0.82604100 | 1.40923300  |

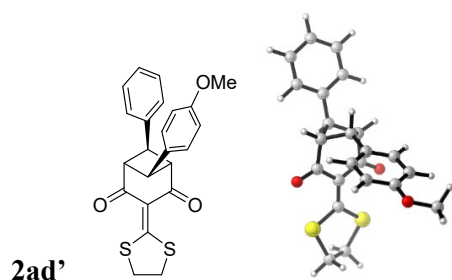

SCF Done: E(UB3LYP) = -1910.87987897 A.U.

Zero-point correction= 0.374451 (Hartree/Particle)

Sum of electronic and thermal Free Energies= -1910.562355

|   |            |             |             |
|---|------------|-------------|-------------|
| C | 3.45697300 | -3.83315800 | -0.75479000 |
| C | 3.80840700 | -3.33922900 | 0.62818900  |
| C | 1.54486200 | -2.12489600 | -0.05226000 |
| H | 4.33351900 | -3.91531100 | -1.39904800 |
| H | 2.94635500 | -4.79668600 | -0.72284500 |

|   |             |             |             |
|---|-------------|-------------|-------------|
| H | 4.53489300  | -2.52611000 | 0.59444000  |
| H | 4.19356200  | -4.13594700 | 1.26613000  |
| S | 2.32999900  | -2.60774800 | -1.54120400 |
| S | 2.27453300  | -2.70913700 | 1.42796400  |
| C | 0.41887400  | -1.33015200 | -0.04583500 |
| C | -0.26271500 | -0.97075400 | 1.20270700  |
| C | -0.15156400 | -0.79254500 | -1.28561700 |
| C | -1.47731600 | -0.07950300 | 1.02624600  |
| C | -1.39773200 | 0.05648400  | -1.09903100 |
| C | -2.36254200 | -0.68809600 | -0.12146900 |
| H | -1.93133500 | 0.13079000  | 1.99200700  |
| O | 0.08525200  | -1.38131700 | 2.30169000  |
| O | 0.33386300  | -0.99085700 | -2.39114600 |
| C | -1.16665000 | 1.09420400  | 0.04676600  |
| H | -1.75175800 | 0.39412000  | -2.07002100 |
| C | -3.81534400 | -0.26208500 | -0.10323700 |
| C | -4.58269600 | -0.51560800 | 1.03892700  |
| C | -4.44459800 | 0.31988500  | -1.20395100 |
| C | -5.93200900 | -0.18908600 | 1.08276200  |
| H | -4.11890600 | -0.97776600 | 1.90343300  |
| C | -5.79737700 | 0.64901800  | -1.16296000 |
| H | -3.88409500 | 0.51735000  | -2.10902100 |
| C | -6.54574700 | 0.39845700  | -0.01991500 |
| H | -6.50546200 | -0.39400600 | 1.97923100  |
| H | -6.26407300 | 1.10244600  | -2.02962300 |
| H | -7.59748000 | 0.65639500  | 0.01289500  |
| H | -2.31916500 | -1.77857100 | -0.18807900 |
| C | 0.09611700  | 1.90912900  | 0.14822200  |
| C | 0.72235200  | 2.41120400  | -0.98891100 |
| C | 0.64153000  | 2.24060700  | 1.39406500  |
| C | 1.85489100  | 3.21932500  | -0.90409300 |
| H | 0.33444000  | 2.16726200  | -1.97135500 |
| C | 1.76579200  | 3.04160400  | 1.49661000  |
| H | 0.18601900  | 1.86055700  | 2.30141500  |
| C | 2.38129000  | 3.53918600  | 0.34569000  |
| H | 2.31281600  | 3.58189900  | -1.81363400 |
| H | 2.18829900  | 3.29042500  | 2.46213600  |
| H | -2.03325100 | 1.76168600  | 0.05735100  |
| O | 3.48598500  | 4.31645000  | 0.54786500  |
| C | 4.15273800  | 4.84606800  | -0.58784200 |
| H | 4.98998700  | 5.42278600  | -0.20028100 |
| H | 4.53072500  | 4.04991200  | -1.23672300 |
| H | 3.49637900  | 5.50436200  | -1.16547100 |

**TS1b-2**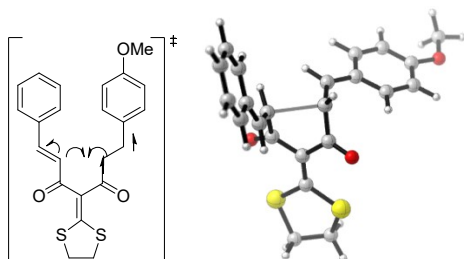

SCF Done: E(UB3LYP) = -1910.78559047 A.U.

Zero-point correction= 0.366026 (Hartree/Particle)

Sum of electronic and thermal Free Energies= -1910.480314

|   |             |             |             |
|---|-------------|-------------|-------------|
| C | 1.32837800  | 4.88025100  | -0.55724200 |
| C | 0.25703100  | 5.28221300  | 0.43157700  |
| C | -0.01995200 | 2.67146600  | 0.03020900  |
| H | 1.46291000  | 5.62498100  | -1.34291100 |
| H | 2.28530600  | 4.70054700  | -0.06574100 |
| H | -0.62085200 | 5.69350700  | -0.06821800 |
| H | 0.62320900  | 6.00320800  | 1.16374800  |
| S | 0.78683900  | 3.32777000  | -1.38075700 |
| S | -0.24602000 | 3.78064900  | 1.36785100  |
| C | -0.45132500 | 1.37014500  | 0.08196000  |
| C | -0.19048100 | 0.39700600  | -0.98447200 |
| C | -1.23265100 | 0.84431100  | 1.19873100  |
| C | -0.28944800 | -1.01908200 | -0.54641900 |
| C | -2.03251100 | -0.39656600 | 0.89062700  |
| H | -0.69902600 | -1.69317300 | -1.29877300 |
| H | -1.92669300 | -1.19842300 | 1.61286300  |
| O | -1.29055100 | 1.35842800  | 2.30687200  |
| O | 0.08354500  | 0.70581900  | -2.14128400 |
| C | -3.15338800 | -0.32420300 | 0.11322900  |
| H | -3.28268500 | 0.56200100  | -0.50291000 |
| C | 0.65698500  | -1.56026700 | 0.43945600  |
| H | 0.28254800  | -1.87466800 | 1.40971800  |
| C | -4.18858300 | -1.33208500 | -0.02762000 |
| C | -5.24214500 | -1.09972200 | -0.92960500 |
| C | -4.19629300 | -2.54124400 | 0.69202100  |
| C | -6.25589500 | -2.02991300 | -1.10744100 |
| H | -5.25516800 | -0.17445000 | -1.49490900 |
| C | -5.20868100 | -3.46958400 | 0.51188700  |
| H | -3.40618800 | -2.75482500 | 1.40111400  |
| C | -6.24450400 | -3.22101700 | -0.38801700 |
| H | -7.05624000 | -1.82638100 | -1.80900200 |
| H | -5.19447200 | -4.39407500 | 1.07712600  |
| C | 2.03515000  | -1.76195000 | 0.19815400  |
| C | 2.66387400  | -1.43874600 | -1.03873000 |

|   |             |             |             |
|---|-------------|-------------|-------------|
| C | 2.86189900  | -2.32061800 | 1.20621300  |
| C | 4.00657000  | -1.65978900 | -1.23546200 |
| H | 2.07519400  | -1.00617800 | -1.83793700 |
| C | 4.21229900  | -2.54419900 | 1.00882000  |
| H | 2.41896100  | -2.57817700 | 2.16185000  |
| C | 4.79899200  | -2.21384600 | -0.21837800 |
| H | 4.47868700  | -1.41138200 | -2.17811600 |
| H | 4.80028200  | -2.97216500 | 1.80892100  |
| O | 6.11514900  | -2.38878000 | -0.52054900 |
| C | 6.97000300  | -2.94868100 | 0.46654800  |
| H | 7.95747600  | -2.99587900 | 0.01267700  |
| H | 7.01132500  | -2.31936700 | 1.36059400  |
| H | 6.64980500  | -3.95729900 | 0.74425200  |
| H | -7.03456900 | -3.94951500 | -0.52444500 |

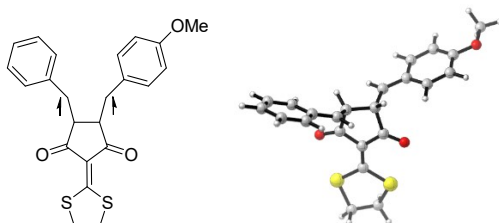

**INTb-2**

SCF Done: E(UB3LYP) = -1910.83538197 A.U.

Zero-point correction= 0.369107 (Hartree/Particle)

Sum of electronic and thermal Free Energies= -1910.526458

|   |             |             |             |
|---|-------------|-------------|-------------|
| C | -1.37965700 | 5.17746100  | -0.15454100 |
| C | -2.78709400 | 4.75040500  | 0.20053200  |
| C | -1.34837700 | 2.53075400  | 0.01147300  |
| H | -1.37052900 | 5.98874600  | -0.88336100 |
| H | -0.81510900 | 5.48195300  | 0.72748000  |
| H | -3.42810100 | 4.69749900  | -0.68020800 |
| H | -3.24265000 | 5.41501500  | 0.93552300  |
| S | -0.51748200 | 3.74872400  | -0.92886600 |
| S | -2.71049000 | 3.07750700  | 0.96179800  |
| C | -0.95323900 | 1.21789800  | 0.00300800  |
| C | 0.17410000  | 0.68639900  | -0.75262100 |
| C | -1.60440400 | 0.14324100  | 0.74015400  |
| C | 0.38755200  | -0.78947800 | -0.32368900 |
| C | -0.97337600 | -1.20251900 | 0.28651800  |
| H | 0.63212600  | -1.37553800 | -1.21304900 |
| H | -0.85098700 | -1.83714300 | 1.16729100  |
| O | -2.49643400 | 0.25678400  | 1.55976400  |
| O | 0.85058000  | 1.28493400  | -1.56873700 |
| C | -1.87514900 | -1.85155400 | -0.71584800 |
| H | -1.64684700 | -1.67385700 | -1.76199800 |

|   |             |             |             |
|---|-------------|-------------|-------------|
| C | 1.50052900  | -0.84591700 | 0.67662200  |
| H | 1.21445700  | -0.84876000 | 1.72346200  |
| C | -3.00968500 | -2.63820000 | -0.42628500 |
| C | -3.73953600 | -3.23183400 | -1.49368600 |
| C | -3.47028200 | -2.88912200 | 0.89452700  |
| C | -4.83949400 | -4.03031300 | -1.25480900 |
| H | -3.41278600 | -3.05125600 | -2.51187100 |
| C | -4.57446200 | -3.69046600 | 1.11941800  |
| H | -2.97064900 | -2.42166800 | 1.73204700  |
| C | -5.26639700 | -4.27031200 | 0.05441600  |
| H | -5.37434800 | -4.47243500 | -2.08744400 |
| H | -4.90966500 | -3.86234300 | 2.13575200  |
| C | 2.87722500  | -0.85216300 | 0.37960300  |
| C | 3.39795200  | -0.77499200 | -0.94412600 |
| C | 3.82772900  | -0.95557800 | 1.42861300  |
| C | 4.75117900  | -0.81693300 | -1.18410900 |
| H | 2.72053200  | -0.64861700 | -1.77746800 |
| C | 5.18876500  | -0.99902400 | 1.18888700  |
| H | 3.47161000  | -1.00911700 | 2.45148200  |
| C | 5.66458300  | -0.93358800 | -0.12583100 |
| H | 5.13884700  | -0.75144400 | -2.19334300 |
| H | 5.87048200  | -1.08358300 | 2.02380000  |
| O | 6.97983700  | -0.96862100 | -0.47760300 |
| C | 7.95451000  | -1.08565200 | 0.54916500  |
| H | 8.91816700  | -1.09809500 | 0.04459100  |
| H | 7.91523700  | -0.23383100 | 1.23469700  |
| H | 7.82845500  | -2.01456300 | 1.11333800  |
| H | -6.13038600 | -4.89651900 | 0.24064300  |

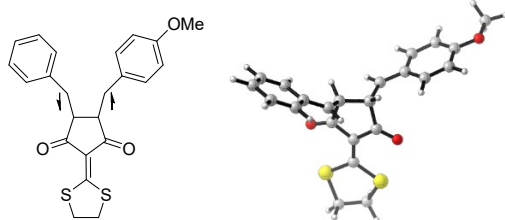

### INTb-2-OSS

SCF Done: E(UB3LYP) = -1910.83707965 A.U.

Zero-point correction= 0.369148 (Hartree/Particle)

Sum of electronic and thermal Free Energies= -1910.527652

|   |            |            |             |
|---|------------|------------|-------------|
| C | 1.74789300 | 5.19032200 | 0.15500100  |
| C | 3.12536100 | 4.67511500 | -0.20118000 |
| C | 1.54780700 | 2.55115900 | -0.01332500 |
| H | 1.79066400 | 6.00122400 | 0.88310700  |
| H | 1.20310200 | 5.52918500 | -0.72691000 |
| H | 3.76170200 | 4.58051500 | 0.67945500  |

|   |             |             |             |
|---|-------------|-------------|-------------|
| H | 3.62219500  | 5.31053600  | -0.93526700 |
| S | 0.79932600  | 3.81944900  | 0.93171100  |
| S | 2.94134300  | 3.01205600  | -0.96544600 |
| C | 1.06866900  | 1.26751500  | -0.00679100 |
| C | -0.08247100 | 0.80650500  | 0.75961200  |
| C | 1.63901300  | 0.15659800  | -0.75831600 |
| C | -0.39923700 | -0.64936700 | 0.32434400  |
| C | 0.92928500  | -1.14862700 | -0.30228400 |
| H | -0.67433800 | -1.22474500 | 1.21178800  |
| H | 0.75742000  | -1.77423600 | -1.18079500 |
| O | 2.52745200  | 0.21323200  | -1.58729600 |
| O | -0.71245000 | 1.43996100  | 1.58606700  |
| C | 1.78549700  | -1.84606600 | 0.69626900  |
| H | 1.66634000  | -1.54410000 | 1.73225000  |
| C | -1.50873300 | -0.62671500 | -0.66976500 |
| H | -1.22511400 | -0.53597600 | -1.71355500 |
| C | 2.76722900  | -2.82211300 | 0.41633500  |
| C | 3.46665600  | -3.43811800 | 1.49039800  |
| C | 3.10193800  | -3.23902600 | -0.89950300 |
| C | 4.41867000  | -4.41164700 | 1.26386600  |
| H | 3.23560800  | -3.13313300 | 2.50511900  |
| C | 4.05846800  | -4.21464500 | -1.11314500 |
| H | 2.62372600  | -2.76918600 | -1.74838900 |
| C | 4.72226200  | -4.81192800 | -0.04022300 |
| H | 4.93298800  | -4.86629300 | 2.10264300  |
| H | 4.29948900  | -4.51148800 | -2.12735400 |
| C | -2.88645800 | -0.65996700 | -0.37198900 |
| C | -3.40465500 | -0.67418000 | 0.95392100  |
| C | -3.83788700 | -0.68651600 | -1.42371500 |
| C | -4.75762000 | -0.72860000 | 1.19334500  |
| H | -2.72638800 | -0.60999200 | 1.79384200  |
| C | -5.19893600 | -0.74194600 | -1.18575600 |
| H | -3.48320700 | -0.66915300 | -2.44830300 |
| C | -5.67274400 | -0.76756500 | 0.13097300  |
| H | -5.14358600 | -0.73166300 | 2.20529300  |
| H | -5.88193300 | -0.76465800 | -2.02351300 |
| O | -6.98699900 | -0.82197000 | 0.48161300  |
| C | -7.96483000 | -0.85747800 | -0.54854100 |
| H | -8.92726600 | -0.90089900 | -0.04343000 |
| H | -7.92158100 | 0.04215900  | -1.16967200 |
| H | -7.84607000 | -1.74333400 | -1.17951700 |
| H | 5.47045700  | -5.57487400 | -0.21729800 |

**TS2b-2**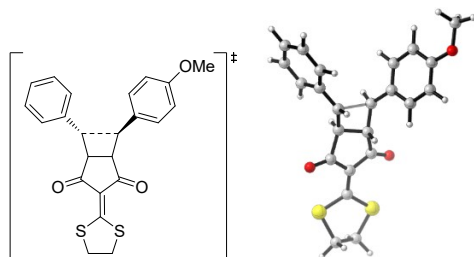

SCF Done: E(UB3LYP) = -1910.80723510 A.U.

Zero-point correction= 0.370904 (Hartree/Particle)

Sum of electronic and thermal Free Energies= -1910.493092

|   |             |             |             |
|---|-------------|-------------|-------------|
| C | 6.38131000  | -0.59336000 | -0.92639500 |
| C | 6.37830400  | -1.63604200 | 0.17986000  |
| C | 3.97677800  | -0.45967900 | 0.09801900  |
| H | 7.35518900  | -0.11408200 | -1.03530000 |
| H | 6.07716000  | -1.02195100 | -1.88201800 |
| H | 6.90994900  | -1.27352800 | 1.05989300  |
| H | 6.83033000  | -2.57351700 | -0.14882500 |
| S | 5.17472100  | 0.70218900  | -0.44471000 |
| S | 4.63587700  | -2.00764600 | 0.65454300  |
| C | 2.57975000  | -0.20316600 | 0.04124300  |
| C | 2.00756700  | 0.97289200  | -0.52768400 |
| C | 1.56601200  | -1.05559400 | 0.65258200  |
| C | 0.51850800  | 1.00276100  | 0.02245600  |
| C | 0.22470900  | -0.48210800 | 0.13947700  |
| H | 0.62520300  | 1.41686300  | 1.02879800  |
| H | 0.14527400  | -0.89090500 | -0.87304300 |
| O | 1.70335900  | -2.05501300 | 1.33709300  |
| O | 2.49279400  | 1.91405400  | -1.15416500 |
| C | -1.16652100 | -0.24267400 | 0.64354200  |
| H | -1.22952200 | 0.25493400  | 1.60620400  |
| C | -0.82703000 | 1.37343700  | -0.49852900 |
| H | -1.08988700 | 0.93119900  | -1.45517500 |
| C | -2.34210000 | -1.02365300 | 0.29438400  |
| C | -3.56499400 | -0.74218500 | 0.92273900  |
| C | -2.32356200 | -2.06014800 | -0.65949600 |
| C | -4.71885600 | -1.45378900 | 0.63225700  |
| H | -3.60857200 | 0.04970400  | 1.66193700  |
| C | -3.46231600 | -2.77758000 | -0.95586200 |
| H | -1.39905100 | -2.32246200 | -1.15781300 |
| C | -4.67319200 | -2.48126300 | -0.31480300 |
| H | -5.63746000 | -1.20944000 | 1.14633000  |
| H | -3.44315900 | -3.58540400 | -1.67632600 |
| C | -1.55498100 | 2.59838600  | -0.19124000 |
| C | -1.10648900 | 3.53295300  | 0.75730800  |



|   |             |             |             |
|---|-------------|-------------|-------------|
| C | -2.76535100 | 2.85808200  | -0.85886900 |
| C | -1.83958200 | 4.67999900  | 1.02234300  |
| H | -0.16937000 | 3.37368000  | 1.27534400  |
| C | -3.49947800 | 4.00204000  | -0.58700800 |
| H | -3.12123800 | 2.15171300  | -1.60038100 |
| C | -3.03969900 | 4.91798500  | 0.35629900  |
| H | -1.47116300 | 5.39638600  | 1.74672900  |
| H | -4.42703600 | 4.18627000  | -1.11573500 |
| H | -3.60905500 | 5.81544700  | 0.56596600  |
| O | -5.73282100 | -3.24444000 | -0.67566500 |
| C | -6.99121800 | -3.01173500 | -0.05086000 |
| H | -7.35311700 | -2.00025300 | -0.25479700 |
| H | -7.67522500 | -3.73580000 | -0.48681300 |
| H | -6.93091600 | -3.17168600 | 1.02903000  |

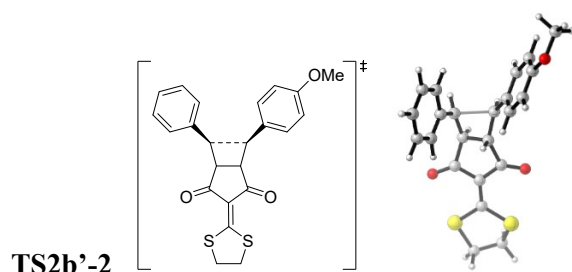

SCF Done: E(UB3LYP) = -1910.80158972 A.U.

Zero-point correction= 0.371006 (Hartree/Particle)

Sum of electronic and thermal Free Energies= -1910.486985

|   |             |             |             |
|---|-------------|-------------|-------------|
| C | 6.50056200  | -0.44277100 | -0.55525200 |
| C | 6.07770400  | -1.88314200 | -0.31563000 |
| C | 3.86018800  | -0.50554500 | -0.13007100 |
| H | 7.40398000  | -0.18870900 | 0.00211100  |
| H | 6.67246400  | -0.25819600 | -1.61582600 |
| H | 6.13908200  | -2.14794300 | 0.74047700  |
| H | 6.67005100  | -2.58642500 | -0.90263200 |
| S | 5.16457100  | 0.68351800  | 0.03188900  |
| S | 4.33503400  | -2.02775500 | -0.86858500 |
| C | 2.53583000  | -0.24877000 | 0.31415500  |
| C | 2.06554800  | 1.05557100  | 0.77555400  |
| C | 1.48541700  | -1.20452000 | 0.29243700  |
| C | 0.67663700  | 0.77519600  | 1.38499300  |
| C | 0.15307700  | -0.35277700 | 0.51104500  |
| H | 0.90583500  | 0.36834400  | 2.37421800  |
| H | -0.06067800 | 0.03906100  | -0.48532700 |
| O | 1.43487000  | -2.40014400 | -0.00173500 |
| O | 2.65110100  | 2.12550900  | 0.77280300  |
| C | -1.13917100 | -0.54450000 | 1.22466100  |

|   |             |             |             |
|---|-------------|-------------|-------------|
| H | -1.04561000 | -0.84719300 | 2.26426500  |
| C | -0.69475200 | 1.39958700  | 1.49315200  |
| C | -2.39926100 | -0.92681000 | 0.61627700  |
| C | -3.45893400 | -1.34776500 | 1.43489000  |
| C | -2.63043900 | -0.88370000 | -0.77319200 |
| C | -4.68796700 | -1.71962900 | 0.91347800  |
| H | -3.30944300 | -1.39520300 | 2.50814800  |
| C | -3.84572800 | -1.25387500 | -1.30654900 |
| H | -1.84402700 | -0.56510000 | -1.44455400 |
| C | -4.88829800 | -1.67436600 | -0.46981800 |
| H | -5.47261200 | -2.04658000 | 1.58075000  |
| H | -4.01866900 | -1.22943800 | -2.37489300 |
| C | -1.30188600 | 2.27676600  | 0.49439200  |
| C | -2.63996700 | 2.67427200  | 0.65803000  |
| C | -0.59207000 | 2.76040400  | -0.61568200 |
| C | -3.25021900 | 3.51517500  | -0.25908000 |
| H | -3.19957600 | 2.31317100  | 1.51366700  |
| C | -1.20608800 | 3.60562700  | -1.53059000 |
| H | 0.45441300  | 2.51400900  | -0.73775000 |
| C | -2.53529500 | 3.98168300  | -1.36011200 |
| H | -4.28275300 | 3.81073200  | -0.11667000 |
| H | -0.63907800 | 3.98261800  | -2.37316300 |
| H | -1.06054000 | 1.56120500  | 2.50305400  |
| H | -3.00962000 | 4.64228700  | -2.07592000 |
| O | -6.04261700 | -2.01396100 | -1.09159100 |
| C | -7.14206800 | -2.45991400 | -0.30394200 |
| H | -7.46839600 | -1.68415100 | 0.39421000  |
| H | -7.94228300 | -2.67296400 | -1.00852800 |
| H | -6.88997500 | -3.37012900 | 0.24681000  |

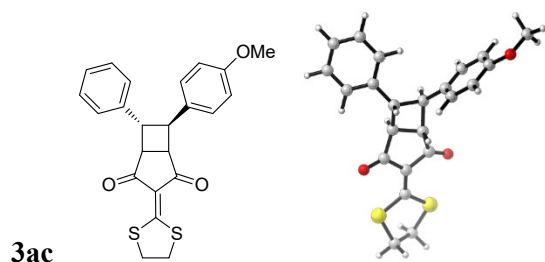

SCF Done: E(UB3LYP) = -1910.84510068 A.U.

Zero-point correction= 0.373291 (Hartree/Particle)

Sum of electronic and thermal Free Energies= -1910.530218

|   |            |             |             |
|---|------------|-------------|-------------|
| C | 6.36822500 | -1.01487900 | -0.64646200 |
| C | 6.16789700 | -1.71343800 | 0.68002500  |
| C | 3.81485500 | -0.66502400 | 0.01430600  |
| H | 7.31957300 | -0.48303600 | -0.68848200 |

|   |             |             |             |
|---|-------------|-------------|-------------|
| H | 6.31222500  | -1.71322000 | -1.48217700 |
| H | 6.48783300  | -1.09040500 | 1.51589700  |
| H | 6.69528300  | -2.66718900 | 0.72296500  |
| S | 5.04103700  | 0.24043000  | -0.85521500 |
| S | 4.37775400  | -2.07893900 | 0.88726600  |
| C | 2.50084500  | -0.29106300 | 0.01083600  |
| C | 1.98554000  | 0.96496900  | -0.61279000 |
| C | 1.39676400  | -1.08426200 | 0.63705600  |
| C | 0.57709000  | 1.04461200  | -0.05225300 |
| C | 0.15942600  | -0.41355400 | 0.06181800  |
| H | 0.72035000  | 1.41706300  | 0.97290700  |
| H | 0.09127000  | -0.81262200 | -0.95997900 |
| O | 1.52043900  | -2.05241000 | 1.35681400  |
| O | 2.60672400  | 1.73469300  | -1.31676400 |
| C | -1.27561200 | 0.07982400  | 0.42826100  |
| H | -1.31249600 | 0.36510400  | 1.48208900  |
| C | -0.89468800 | 1.38257900  | -0.41743600 |
| H | -1.07947700 | 1.17502000  | -1.47589000 |
| C | -2.47724100 | -0.75307500 | 0.08587600  |
| C | -3.32902200 | -1.20085400 | 1.09188000  |
| C | -2.78310100 | -1.12461200 | -1.23023600 |
| C | -4.44525300 | -1.98994900 | 0.81889800  |
| H | -3.12022100 | -0.93436200 | 2.12236500  |
| C | -3.88639000 | -1.90589400 | -1.52253500 |
| H | -2.15232700 | -0.79689800 | -2.04895200 |
| C | -4.72850400 | -2.34672700 | -0.49735200 |
| H | -5.07512500 | -2.31528300 | 1.63487900  |
| H | -4.11797600 | -2.18774400 | -2.54214400 |
| C | -1.45860500 | 2.72496400  | -0.04133000 |
| C | -0.64469000 | 3.85976000  | -0.05303700 |
| C | -2.80659200 | 2.87193400  | 0.29661800  |
| C | -1.16331000 | 5.11053400  | 0.26629400  |
| H | 0.40171400  | 3.76468700  | -0.32261400 |
| C | -3.32525000 | 4.12161300  | 0.61853000  |
| H | -3.45591000 | 2.00420400  | 0.30727500  |
| C | -2.50547400 | 5.24573200  | 0.60474000  |
| H | -0.51619300 | 5.97977800  | 0.25080500  |
| H | -4.37248200 | 4.21667700  | 0.88127100  |
| H | -2.90966500 | 6.21899500  | 0.85665600  |
| O | -5.79009000 | -3.11045800 | -0.88515500 |
| C | -6.67518500 | -3.59090600 | 0.11609500  |
| H | -7.15446400 | -2.76668500 | 0.65320800  |
| H | -7.43339700 | -4.16826600 | -0.40854400 |
| H | -6.15609400 | -4.23797800 | 0.82968600  |

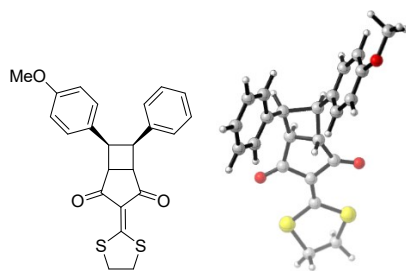

**3ad**

SCF Done: E(UB3LYP) = -1910.83885888 A.U.

Zero-point correction= 0.373577 (Hartree/Particle)

Sum of electronic and thermal Free Energies= -1910.522327

|   |             |             |             |
|---|-------------|-------------|-------------|
| C | 6.31828200  | -0.32593700 | -0.98967800 |
| C | 6.16392800  | -1.75132500 | -0.50802900 |
| C | 3.83815300  | -0.54139400 | -0.05223400 |
| H | 7.29443700  | 0.08812900  | -0.73412600 |
| H | 6.16728700  | -0.24579800 | -2.06674200 |
| H | 6.57540900  | -1.88542300 | 0.49297900  |
| H | 6.63455800  | -2.46463200 | -1.18581600 |
| S | 5.05619900  | 0.71719500  | -0.15266600 |
| S | 4.37258200  | -2.16334200 | -0.45357900 |
| C | 2.54903600  | -0.27618000 | 0.31651700  |
| C | 2.06739700  | 1.06007400  | 0.77549300  |
| C | 1.44865200  | -1.28701200 | 0.31030300  |
| C | 0.69601600  | 0.72858200  | 1.34943000  |
| C | 0.21351900  | -0.41981500 | 0.47701100  |
| H | 0.95076700  | 0.29707500  | 2.32809100  |
| H | 0.03814500  | -0.00227500 | -0.52295900 |
| O | 1.56776400  | -2.48273900 | 0.14117700  |
| O | 2.69626300  | 2.09845000  | 0.75289200  |
| C | -1.14108200 | -0.37486600 | 1.22690500  |
| H | -1.04333400 | -0.87716100 | 2.19178600  |
| C | -0.78766000 | 1.19593700  | 1.50387300  |
| C | -2.41970200 | -0.81351500 | 0.57951600  |
| C | -3.41974500 | -1.39462700 | 1.35668700  |
| C | -2.67505600 | -0.66392500 | -0.78960400 |
| C | -4.63322100 | -1.81116700 | 0.81339800  |
| H | -3.25151600 | -1.53741100 | 2.41917000  |
| C | -3.87104700 | -1.07550900 | -1.34960700 |
| H | -1.93060500 | -0.21775100 | -1.43704300 |
| C | -4.86295500 | -1.65103600 | -0.55160800 |
| H | -5.37536000 | -2.26140600 | 1.45758100  |
| H | -4.05964600 | -0.95964800 | -2.40957600 |
| C | -1.35982000 | 2.20513700  | 0.54435900  |
| C | -2.73122000 | 2.48425400  | 0.59545800  |

|   |             |             |             |
|---|-------------|-------------|-------------|
| C | -0.57742000 | 2.90841200  | -0.37333000 |
| C | -3.30329400 | 3.42271200  | -0.25222900 |
| H | -3.35722800 | 1.95600500  | 1.30540300  |
| C | -1.15060600 | 3.84830500  | -1.22734200 |
| H | 0.49284800  | 2.75318100  | -0.40588400 |
| C | -2.51416200 | 4.10683900  | -1.17327600 |
| H | -4.36735600 | 3.62032400  | -0.19508500 |
| H | -0.52206100 | 4.38534800  | -1.92807600 |
| H | -1.03875400 | 1.49147400  | 2.52358700  |
| H | -2.95910000 | 4.83993600  | -1.83565300 |
| O | -6.00696900 | -2.02233100 | -1.19605000 |
| C | -7.04601400 | -2.61851900 | -0.43424700 |
| H | -7.41272700 | -1.93882400 | 0.34127700  |
| H | -7.84886300 | -2.82855800 | -1.13775900 |
| H | -6.71572900 | -3.55382100 | 0.02800600  |

## 6. X-Ray Structures of Compounds 2a and 2g'

Single-crystal X-ray diffraction data was collected at room temperature on a Oxford Diffraction Gemini R Ultra diffractometer, the X-ray generator using Mo-K $\alpha$  ( $\lambda=0.71073$  Å) radiation with a  $\omega$  scan technique. The crystal structures were solved by direct method of SHELXS-97 1 and refined by full-matrix least-squares techniques using the SHELXL-97 program. Drawing of the compound shows ellipsoid contour at the 30% probability level. Non-hydrogen atoms were refined anisotropic. CCDC deposition number: 2120337 (**2a**) and 2120342 (**2g'**). The data can be obtained free of charge from The Cambridge Crystallographic Data Centre via [www.ccdc.cam.ac.uk/data\\_request/cif](http://www.ccdc.cam.ac.uk/data_request/cif).

### 6.1 Crystal data of 2a

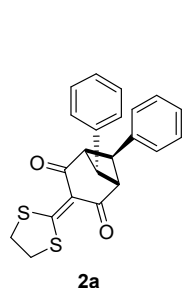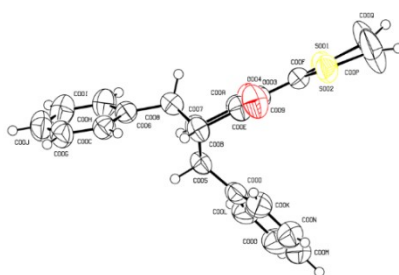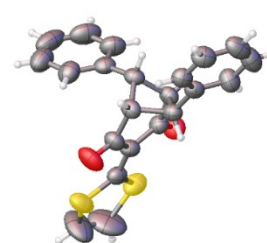

|                   |                                                               |
|-------------------|---------------------------------------------------------------|
| Empirical formula | C <sub>22</sub> H <sub>16</sub> O <sub>2</sub> S <sub>2</sub> |
| Formula weight    | 378.07                                                        |
| Crystal system    | Monoclinic                                                    |
| Space group       | -C 1                                                          |
| a (Å)             | 28.151(2)                                                     |
| b (Å)             | 8.7194(6)                                                     |
| c (Å)             | 16.9591(13)                                                   |

|                                              |                       |
|----------------------------------------------|-----------------------|
| a (Å)                                        | 90                    |
| β (deg)                                      | 115.173(4)            |
| γ (deg)                                      | 90                    |
| Volume (Å <sup>3</sup> )                     | 3767.5(5)             |
| Z                                            | 1 c                   |
| Calculated density (mg/m <sup>3</sup> )      | 1.3128                |
| Absorption coefficient (mm <sup>-1</sup> )   | 1.114                 |
| F(000)                                       | 1568.0                |
| Theta range for data collection (deg)        | 3.470 to 63.639       |
| Reflections collected/unique                 | 4434/5989             |
| Goodness-of-fit on F <sup>2</sup>            | 7.4990                |
| Final R indices [ <i>I</i> > 2σ( <i>I</i> )] | R1=0.4375, WR2=0.7739 |
| R indices (all data)                         | R1=0.4734, WR2=0.8022 |

## 6.2 Crystal data of 2g'

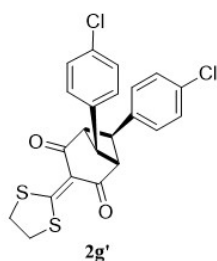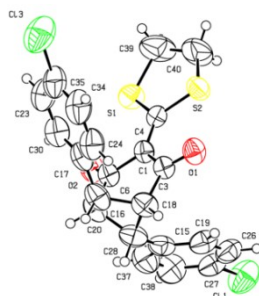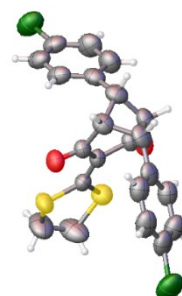

|                                            |                                                                               |
|--------------------------------------------|-------------------------------------------------------------------------------|
| Empirical formula                          | C <sub>22</sub> H <sub>16</sub> Cl <sub>2</sub> O <sub>2</sub> S <sub>2</sub> |
| Formula weight                             | 446.00                                                                        |
| Crystal system                             | Monoclinic                                                                    |
| Space group                                | P -1                                                                          |
| a (Å)                                      | 12.9787(15)                                                                   |
| b (Å)                                      | 13.8453(17)                                                                   |
| c (Å)                                      | 14.023(2)                                                                     |
| α (Å)                                      | 75.109(12)                                                                    |
| β (deg)                                    | 71.440(13)                                                                    |
| γ (deg)                                    | 70.545(11)                                                                    |
| Volume (Å <sup>3</sup> )                   | 2220.0(6)                                                                     |
| Z                                          | 1                                                                             |
| Calculated density (mg/m <sup>3</sup> )    | 1.337                                                                         |
| Absorption coefficient (mm <sup>-1</sup> ) | 0.495                                                                         |
| F(000)                                     | 918.0                                                                         |
| Theta range for data collection (deg)      | 4.216 to 25.663                                                               |
| Reflections collected/unique               | 5533/8662                                                                     |

|                                              |                       |
|----------------------------------------------|-----------------------|
| Goodness-of-fit on F <sup>2</sup>            | 1.088                 |
| Final R indices [ <i>I</i> > 2σ( <i>I</i> )] | R1=0.0618, WR2=0.1539 |
| R indices (all data)                         | R1=0.0989, WR2=0.1751 |

---

## 7. Characterization data for the products

**(1*R*,5*S*,6*R*,7*S*)-3-(1,3-dithiolan-2-ylidene)-6,7-diphenylbicyclo[3.1.1]heptane-2,4-dione (2a)**

**(1*r*,5*s*,6*R*,7*S*)-3-(1,3-dithiolan-2-ylidene)-6,7-diphenylbicyclo[3.1.1]heptane-2,4-dione (2a')**

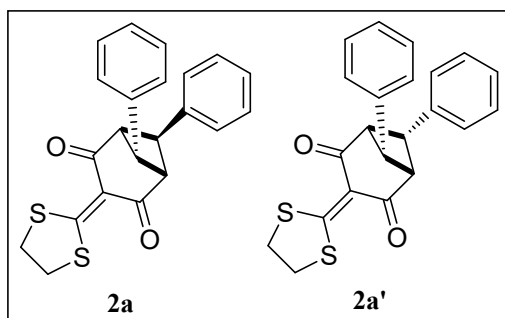

**2a/2a'** (56.7 mg, 50% yield) as yellow oil, cannot be separated by column chromatography.

**2a**, <sup>1</sup>H NMR (600 MHz, CDCl<sub>3</sub>), δ 7.47 (d, *J* = 7.8 Hz, 2H), 7.43 (t, *J* = 7.2 Hz, 2H), 7.32 (t, *J* = 7.2 Hz, 1H), 7.22 (d, *J* = 7.2 Hz, 2H), 7.12 (d, *J* = 7.2 Hz, 1H), 7.00 (d, *J* = 8.4 Hz, 2H), 4.40 (t, *J* = 6.0 Hz, 1H), 3.92 (d, *J* = 6.0 Hz, 2H), 3.83 (s, 1H), 3.34-3.28 (m, 4H).

**2a'**, <sup>1</sup>H NMR (600 MHz, CDCl<sub>3</sub>), δ 7.18 (t, *J* = 7.2 Hz, 5H), 7.09 (d, *J* = 7.8 Hz, 5H), 4.23 (t, *J* = 6.6 Hz, 2H), 4.17 (t, *J* = 5.4 Hz, 2H), 3.10 (s, 4H).

**2a/2a'**, <sup>13</sup>C NMR (151 MHz, CDCl<sub>3</sub>) δ 195.2, 194.0, 182.1, 179.6, 138.7, 138.3, 137.9, 128.9, 128.4, 128.4, 127.0, 127.0, 126.4, 126.3, 126.1, 125.7, 120.4, 119.2, 55.4, 55.0, 46.5, 46.0, 46.0, 37.5, 37.1. **HRMS** (ESI, *m/z*): Calculated for C<sub>22</sub>H<sub>18</sub>O<sub>2</sub>S<sub>2</sub> [M+Na]<sup>+</sup> 401.0640, found 401.0645.

**(1*R*,5*S*,7*S*)-3-(1,3-dithiolan-2-ylidene)-6,7-diphenylbicyclo[3.2.0]heptane-2,4-dione (3a)**

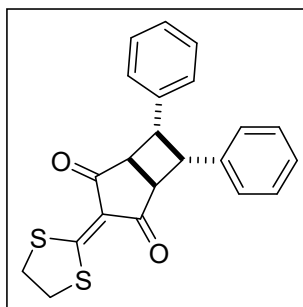

**3a** (42.0 mg, 37% yield) as yellow solid. mp: 203-204 °C.

**<sup>1</sup>H NMR** (600 MHz, CDCl<sub>3</sub>) δ 7.10 (t, *J* = 7.2 Hz, 4H), 7.03 (t, *J* = 7.2 Hz, 2H), 6.98 (d, *J* = 7.8 Hz, 4H), 4.06 (d, *J* = 3.6 Hz, 2H), 3.65 (d, *J* = 4.2 Hz, 2H), 3.56 (s, 4H).

**<sup>13</sup>C NMR** (151 MHz, CDCl<sub>3</sub>) δ 200.6, 183.9, 139.2, 128.0, 127.9, 126.2, 121.3, 48.0, 47.2, 37.6. **HRMS** (ESI, *m/z*): Calculated for C<sub>22</sub>H<sub>18</sub>O<sub>2</sub>S<sub>2</sub> [M+Na]<sup>+</sup> 401.0640, found 401.0638.

**(1*R*,5*S*,6*R*,7*S*)-3-(1,3-dithiolan-2-ylidene)-6,7-di-*p*-tolylbicyclo[3.1.1]heptane-2,4-dione (2b)**

**(1*r*,5*s*,6*R*,7*S*)-3-(1,3-dithiolan-2-ylidene)-6,7-di-*p*-tolylbicyclo[3.1.1]heptane-2,4-dione (2b')**

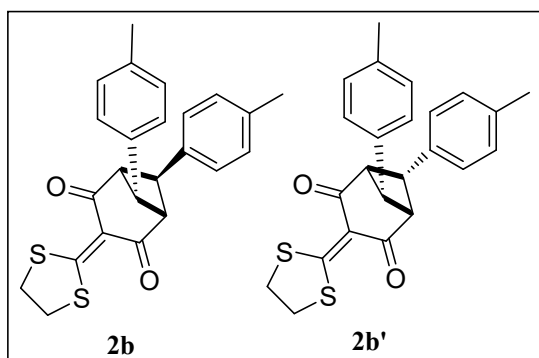

**2b/2b'** (51.2 mg, 42% yield) as yellow oil, cannot be separated by column chromatography.

**2b**, **<sup>1</sup>H NMR** (600 MHz, CDCl<sub>3</sub>) δ 7.34 (d, *J* = 7.8 Hz, 2H), 6.96 (t, *J* = 5.4 Hz, 5H), 6.87 (s, 1H), 4.35 (t, *J* = 6.0 Hz, 1H), 3.86 (d, *J* = 6.0 Hz, 2H), 3.77 (s, 1H), 3.31-3.26 (m, 4H), 2.36 (s, 3H), 2.32 (s, 1H), 2.21 (s, 5H).

**2b'**, **<sup>1</sup>H NMR** (600 MHz, CDCl<sub>3</sub>) δ 7.22 (t, *J* = 8.4 Hz, 3H), 6.99 (d, *J* = 8.4 Hz, 4H), 6.86 (s, 1H), 4.16 (t, *J* = 6.0 Hz, 2H), 4.11 (t, *J* = 6.0 Hz, 2H), 3.09 (s, 4H), 2.22 (s, 6H).

**2b/2b'**, **<sup>13</sup>C NMR** (151 MHz, CDCl<sub>3</sub>) δ 195.4, 194.2, 181.6, 179.0, 136.6, 135.8, 135.7, 135.5, 135.2, 134.8, 129.7, 129.4, 129.0, 128.5, 126.9, 125.9, 125.5, 120.5, 119.3, 55.4, 55.0, 46.3, 45.9, 45.8, 37.4, 37.0, 21.0, 21.0. **HRMS** (ESI, *m/z*): Calculated for C<sub>24</sub>



H<sub>22</sub>O<sub>2</sub>S<sub>2</sub> [M+Na]<sup>+</sup> 429.0953, found 429.0955.

**(1*R*,5*S*,7*S*)-3-(1,3-dithiolan-2-ylidene)-6,7-di-*p*-tolylbicyclo[3.2.0]heptane-2,4-dione (3b)**

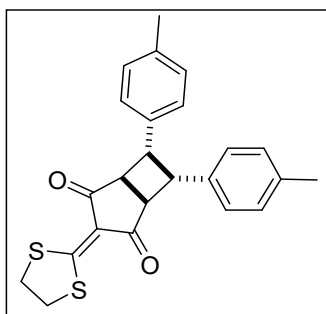

**3b** (51.2 mg, 42% yield) as brown oil.

<sup>1</sup>H NMR (500 MHz, CDCl<sub>3</sub>) δ 6.91 (d, *J* = 8.0 Hz, 4H), 6.87 (d, *J* = 8.0 Hz, 4H), 3.98 (d, *J* = 3.5 Hz, 2H), 3.58 (d, *J* = 4.0 Hz, 2H), 3.52 (s, 4H), 2.20 (s, 6H). <sup>13</sup>C NMR (151 MHz, CDCl<sub>3</sub>) δ 200.6, 183.5, 136.2, 135.5, 128.5, 127.8, 121.3, 48.4, 46.9, 37.5, 20.9. HRMS (ESI, *m/z*): Calculated for C<sub>24</sub>H<sub>22</sub>O<sub>2</sub>S<sub>2</sub> [M+Na]<sup>+</sup> 429.0953, found 429.0944.

**(1*R*,5*S*,6*R*,7*S*)-3-(1,3-dithiolan-2-ylidene)-6,7-bis(4-methoxyphenyl)bicyclo[3.1.1]heptane-2,4-dione (2c)**

**(1*r*,5*s*,6*R*,7*S*)-3-(1,3-dithiolan-2-ylidene)-6,7-bis(4-methoxyphenyl)bicyclo[3.1.1]heptane-2,4-dione (2c')**

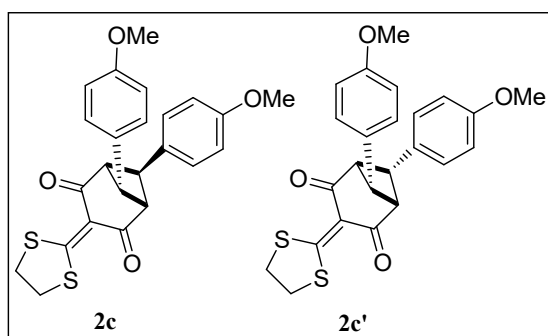

**2c/2c'** (53.9 mg, 41% yield) as yellow oil, cannot be separated by column chromatography.

**2c**, <sup>1</sup>H NMR (600 MHz, CDCl<sub>3</sub>) δ 7.36 (d, *J* = 8.4 Hz, 2H), 6.95 (d, *J* = 9.0 Hz, 2H), 6.91 (d, *J* = 8.4 Hz, 2H), 6.71 (d, *J* = 9.0 Hz, 2H), 4.34 (t, *J* = 6.6 Hz, 1H), 3.83 (s, 2H), 3.82 (s, 3H), 3.76 (s, 1H), 3.71 (s, 3H), 3.34-3.29 (m, 4H).

**2c'**, <sup>1</sup>H NMR (600 MHz, CDCl<sub>3</sub>) δ 6.99 (d, *J* = 8.4 Hz, 4H), 6.73 (d, *J* = 8.4 Hz, 4H), 4.15 (t, *J* = 6.0 Hz, 2H), 4.08 (t, *J* = 5.4 Hz, 2H), 3.71 (s, 6H), 3.13 (s, 4H).

**2c/2c'**, <sup>13</sup>C NMR (151 MHz, CDCl<sub>3</sub>) δ 195.4, 194.3, 181.7, 179.1, 158.5, 157.9, 157.8, 130.7, 130.2, 130.0, 128.1, 127.2, 126.8, 120.5, 119.3, 114.2, 113.8, 55.5, 55.3, 55.1,

55.1, 45.9, 45.5, 45.5, 37.4, 37.0. **HRMS** (ESI,  $m/z$ ): Calculated for  $C_{24}H_{22}O_4S_2$  [ $M+Na$ ] $^+$  461.0852, found 461.0845.

**(1*R*,5*S*,7*S*)-3-(1,3-dithiolan-2-ylidene)-6,7-bis(4-methoxyphenyl)bicyclo[3.2.0]heptane-2,4-dione (3c)**

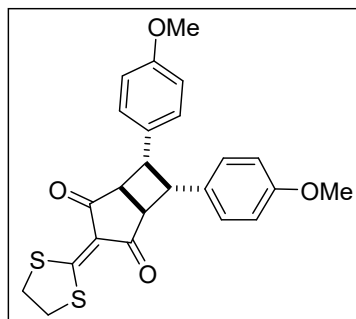

**3c** (53.9 mg, 41% yield) as yellow oil.

**$^1H$  NMR** (500 MHz,  $CDCl_3$ )  $\delta$  6.89 (d,  $J = 8.0$  Hz, 4H), 6.66 (d,  $J = 8.5$  Hz, 4H), 3.96 (d,  $J = 3.5$  Hz, 2H), 3.71 (s, 6H), 3.56 (s, 6H).  **$^{13}C$  NMR** (151 MHz,  $CDCl_3$ )  $\delta$  200.7, 183.6, 157.8, 131.4, 129.0, 127.5, 113.3, 55.1, 48.3, 46.6, 37.5. **HRMS** (ESI,  $m/z$ ): Calculated for  $C_{24}H_{22}O_4S_2$  [ $M+Na$ ] $^+$  461.0852, found 461.0861.

**(1*R*,5*S*,6*R*,7*S*)-3-(1,3-dithiolan-2-ylidene)-6,7-bis(4-(methylthio)phenyl)bicyclo[3.1.1]heptane-2,4-dione (2d)**

**(1*r*,5*s*,6*R*,7*S*)-3-(1,3-dithiolan-2-ylidene)-6,7-bis(4-(methylthio)phenyl)bicyclo[3.1.1]heptane-2,4-dione (2d')**

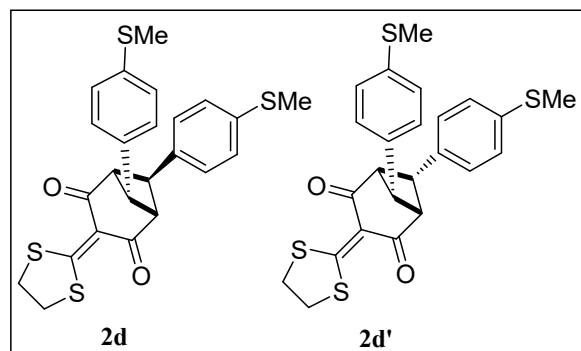

**2d/2d'** (57.8 mg, 41% yield) as yellow solid. mp: 105-106 °C, cannot be separated by column chromatography.

**2d**,  **$^1H$  NMR** (600 MHz,  $CDCl_3$ )  $\delta$  7.37 (d,  $J = 7.8$  Hz, 2H), 7.31 (d,  $J = 7.8$  Hz, 2H), 7.06 (d,  $J = 8.4$  Hz, 2H), 6.91 (d,  $J = 7.8$  Hz, 2H), 4.32 (t,  $J = 6.0$  Hz, 1H), 3.84 (d,  $J = 6.0$  Hz, 2H), 3.78 (s, 1H), 3.34 (s, 4H), 2.50 (s, 3H), 2.40 (s, 3H).

**2d'**,  **$^1H$  NMR** (600 MHz,  $CDCl_3$ )  $\delta$  7.09 (d,  $J = 8.4$  Hz, 4H), 7.00 (d,  $J = 8.4$  Hz, 4H), 4.16 (t,  $J = 6.0$  Hz, 2H), 4.10 (t,  $J = 6.0$  Hz, 2H), 3.16 (s, 4H), 2.41 (s, 6H).

**2d/2d'**,  **$^{13}C$  NMR** (151 MHz,  $CDCl_3$ )  $\delta$  195.0, 193.9, 136.4, 134.7, 127.6, 127.1, 126.6,

126.6, 126.6, 126.5, 126.3, 120.2, 55.4, 55.0, 46.2, 45.8, 45.7, 37.5, 37.2, 15.9, 15.7, 15.6. **HRMS** (ESI, m/z): Calculated for C<sub>24</sub>H<sub>22</sub>O<sub>2</sub>S<sub>4</sub> [M+Na]<sup>+</sup> 493.0395, found 493.0391.

**(1*R*,5*S*,7*S*)-3-(1,3-dithiolan-2-ylidene)-6,7-bis(4-(methylthio)phenyl)bicyclo[3.2.0]heptane-2,4-dione (3d)**

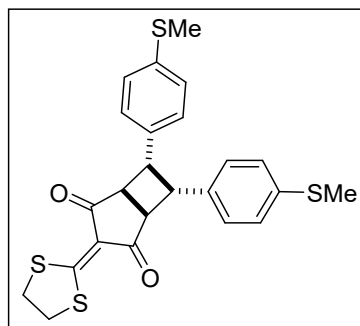

**3d** (57.8 mg, 41% yield) as yellow solid. mp: 143-144 °C.

**<sup>1</sup>H NMR** (500 MHz, CDCl<sub>3</sub>) δ 7.02 (d, *J* = 8.5 Hz, 4H), 6.90 (d, *J* = 8.5 Hz, 4H), 3.99 (d, *J* = 4.0 Hz, 2H), 3.57 (s, 2H), 3.57 (s, 4H), 2.40 (s, 6H). **<sup>13</sup>C NMR** (151 MHz, CDCl<sub>3</sub>) δ 200.3, 136.1, 136.0, 128.4, 128.1, 126.9, 126.2, 48.1, 46.7, 37.6, 15.8. **HRMS** (ESI, m/z): Calculated for C<sub>24</sub>H<sub>22</sub>O<sub>2</sub>S<sub>4</sub> [M+Na]<sup>+</sup> 493.0395, found 493.0402.

**(1*R*,5*S*,6*R*,7*S*)-3-(1,3-dithiolan-2-ylidene)-6,7-bis(4-isopropylphenyl)bicyclo[3.1.1]heptane-2,4-dione (2e)**

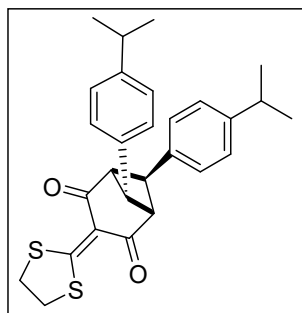

**2e** (33.2 mg, 24% yield) as yellow solid. mp: 198-200 °C.

**<sup>1</sup>H NMR** (500 MHz, CDCl<sub>3</sub>) δ 7.37 (d, *J* = 8.0 Hz, 2H), 7.28 (d, *J* = 8.0 Hz, 2H), 7.03 (d, *J* = 7.5 Hz, 2H), 6.90 (d, *J* = 8.0 Hz, 2H), 4.38 (t, *J* = 6.5 Hz, 1H), 3.88 (d, *J* = 6.5 Hz, 2H), 3.78 (s, 1H), 3.35-3.30 (m, 2H), 3.30-3.25 (m, 2H), 2.97-2.89 (m, 1H), 2.82-2.74 (m, 1H), 1.27 (d, *J* = 7.0 Hz, 6H), 1.15 (d, *J* = 7.0 Hz, 6H). **<sup>13</sup>C NMR** (151 MHz, CDCl<sub>3</sub>) δ 195.5, 181.5, 147.7, 146.6, 135.9, 135.6, 127.0, 126.8, 126.4, 125.6, 119.5, 55.5, 46.4, 45.9, 37.4, 33.7, 33.5, 23.9, 23.8. **HRMS** (ESI, m/z): Calculated for C<sub>28</sub>H<sub>30</sub>O<sub>2</sub>S<sub>2</sub> [M+Na]<sup>+</sup> 485.1579, found 485.1587.

**(1*r*,5*s*,6*R*,7*S*)-3-(1,3-dithiolan-2-ylidene)-6,7-bis(4-isopropylphenyl)bicyclo[3.1.1]heptane-2,4-dione (2e')**

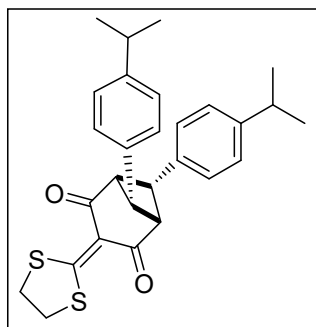

**2e'** (29.2 mg, 21% yield) as white solid. mp: 125-127 °C.

**<sup>1</sup>H NMR** (600 MHz, CDCl<sub>3</sub>) δ 7.05 (d, *J* = 8.4 Hz, 4H), 6.99 (d, *J* = 7.8 Hz, 4H), 4.18 (t, *J* = 6.6 Hz, 2H), 4.12 (t, *J* = 6.0 Hz, 2H), 3.07 (s, 4H), 2.82-2.76 (m, 2H), 1.15 (d, *J* = 6.6 Hz, 12H). **<sup>13</sup>C NMR** (151 MHz, CDCl<sub>3</sub>) δ 194.4, 178.8, 146.8, 135.2, 126.4, 126.0, 120.9, 55.2, 46.0, 37.1, 33.6, 23.8. **HRMS** (ESI, *m/z*): Calculated for C<sub>28</sub>H<sub>30</sub>O<sub>2</sub>S<sub>2</sub> [M+Na]<sup>+</sup> 485.1579, found 485.1571.

**(1*R*,5*S*,7*S*)-3-(1,3-dithiolan-2-ylidene)-6,7-bis(4-isopropylphenyl)bicyclo[3.2.0]heptane-2,4-dione (3e)**

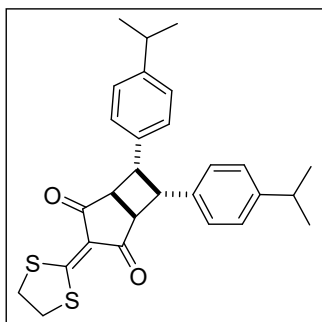

**3e** (56.8 mg, 41% yield) as brown oil.

**<sup>1</sup>H NMR** (600 MHz, CDCl<sub>3</sub>) δ 6.93 (d, *J* = 7.8 Hz, 4H), 6.87 (d, *J* = 8.4 Hz, 4H), 3.99 (d, *J* = 3.6 Hz, 2H), 3.62 (d, *J* = 4.2 Hz, 2H), 3.50 (s, 4H), 2.78-2.71 (m, 2H), 1.12 (d, *J* = 7.2 Hz, 12H). **<sup>13</sup>C NMR** (151 MHz, CDCl<sub>3</sub>) δ 200.6, 183.4, 146.6, 136.4, 127.8, 125.6, 121.3, 47.9, 47.0, 37.5, 33.4, 23.8. **HRMS** (ESI, *m/z*): Calculated for C<sub>28</sub>H<sub>30</sub>O<sub>2</sub>S<sub>2</sub> [M+Na]<sup>+</sup> 485.1579, found 485.1568.

**(1*R*,5*S*,6*R*,7*S*)-6,7-bis(4-(*tert*-butyl)phenyl)-3-(1,3-dithiolan-2-ylidene)bicyclo[3.1.1]heptane-2,4-dione (2f)**

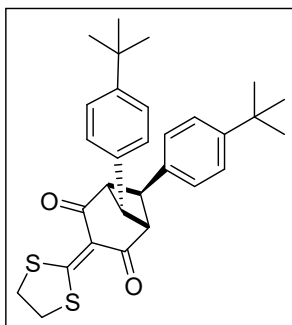

**2f** (43.7 mg, 30% yield) as yellow oil.

<sup>1</sup>H NMR (600 MHz, CDCl<sub>3</sub>) δ 7.44 (d, *J* = 8.4 Hz, 2H), 7.38 (d, *J* = 8.4 Hz, 2H), 7.18 (d, *J* = 8.4 Hz, 2H), 6.91 (d, *J* = 8.4 Hz, 2H), 4.38 (t, *J* = 6.0 Hz, 1H), 3.88 (d, *J* = 6.6 Hz, 2H), 3.78 (s, 1H), 3.34-3.31 (m, 2H), 3.30-3.27 (m, 2H), 1.34 (s, 9H), 1.22 (s, 9H).<sup>1</sup>  
<sup>13</sup>C NMR (151 MHz, CDCl<sub>3</sub>) δ 195.6, 181.5, 150.0, 148.9, 135.6, 135.3, 126.8, 125.7, 125.4, 125.3, 119.6, 55.5, 46.3, 45.9, 37.5, 34.5, 34.3, 31.3, 31.2. HRMS (ESI, m/z): Calculated for C<sub>30</sub>H<sub>34</sub>O<sub>2</sub>S<sub>2</sub> [M+Na]<sup>+</sup> 513.1892, found 513.1899.

**(1*r*,5*s*,6*R*,7*S*)-6,7-bis(4-(*tert*-butyl)phenyl)-3-(1,3-dithiolan-2-ylidene)bicyclo[3.1.1]heptane-2,4-dione (2f')**

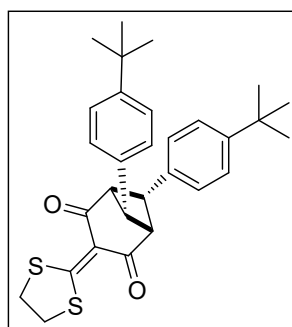

**2f'** (25.4 mg, 17% yield) as yellow solid. mp: 199-201 °C.

<sup>1</sup>H NMR (600 MHz, CDCl<sub>3</sub>) δ 7.22 (d, *J* = 8.4 Hz, 4H), 7.00 (d, *J* = 8.4 Hz, 4H), 4.19 (t, *J* = 6.0 Hz, 2H), 4.13 (t, *J* = 6.0 Hz, 2H), 3.08 (s, 4H), 1.23 (s, 18H). <sup>13</sup>C NMR (151 MHz, CDCl<sub>3</sub>) δ 194.6, 178.7, 149.1, 134.8, 125.8, 125.3, 121.0, 55.2, 46.0, 37.1, 34.4, 31.2. HRMS (ESI, m/z): Calculated for C<sub>30</sub>H<sub>34</sub>O<sub>2</sub>S<sub>2</sub> [M+Na]<sup>+</sup> 513.1892, found 513.1883.

**(1*R*,5*S*,7*S*)-6,7-bis(4-(*tert*-butyl)phenyl)-3-(1,3-dithiolan-2-ylidene)bicyclo[3.2.0]heptane-2,4-dione (3f)**

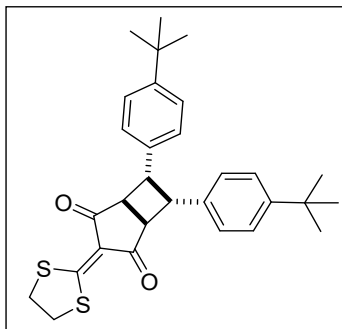

**3f** (66.2 mg, 45% yield) as yellow oil.

$^1\text{H NMR}$  (600 MHz,  $\text{CDCl}_3$ )  $\delta$  7.08 (d,  $J = 8.4$  Hz, 4H), 6.86 (d,  $J = 8.4$  Hz, 4H), 3.99 (d,  $J = 4.2$  Hz, 2H), 3.63 (d,  $J = 4.2$  Hz, 2H), 3.54 (s, 4H), 1.19 (s, 18H).  $^{13}\text{C NMR}$  (151 MHz,  $\text{CDCl}_3$ )  $\delta$  200.8, 183.3, 148.9, 136.1, 127.6, 124.5, 121.4, 47.8, 47.0, 37.5, 34.2, 31.2. **HRMS** (ESI,  $m/z$ ): Calculated for  $\text{C}_{30}\text{H}_{34}\text{O}_2\text{S}_2$   $[\text{M}+\text{Na}]^+$  513.1892, found 513.1893.

**(1R,5S,6R,7S)-6,7-bis(4-chlorophenyl)-3-(1,3-dithiolan-2-ylidene)bicyclo[3.1.1]heptane-2,4-dione (2g)**

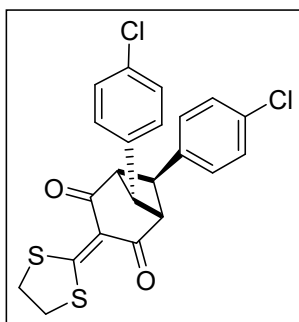

**2g** (24.7 mg, 18% yield) as yellow solid. mp: 225-227 °C.

$^1\text{H NMR}$  (600 MHz,  $\text{CDCl}_3$ )  $\delta$  7.41-7.37 (m, 4H), 7.15 (d,  $J = 8.4$  Hz, 2H), 6.93-6.91 (m, 2H), 4.28 (t,  $J = 6.0$  Hz, 1H), 3.84 (d,  $J = 6.0$  Hz, 2H), 3.78 (s, 1H), 3.35 (d,  $J = 1.8$  Hz, 4H).  $^{13}\text{C NMR}$  (151 MHz,  $\text{CDCl}_3$ )  $\delta$  194.4, 183.1, 136.9, 136.5, 133.0, 132.3, 129.0, 128.6, 128.4, 127.2, 118.7, 55.2, 45.9, 45.4, 37.5. **HRMS** (ESI,  $m/z$ ): Calculated for  $\text{C}_{22}\text{H}_{16}\text{Cl}_2\text{O}_2\text{S}_2$   $[\text{M}+\text{Na}]^+$  468.9861, found 468.9865.

**(1r,5s,6R,7S)-6,7-bis(4-chlorophenyl)-3-(1,3-dithiolan-2-ylidene)bicyclo[3.1.1]heptane-2,4-dione (2g<sup>2</sup>)**

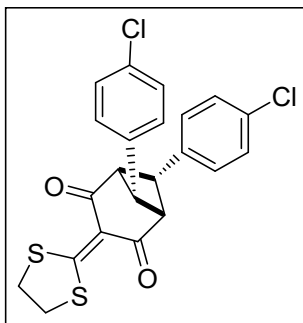

**2g'** (26.2 mg, 20% yield) as yellow solid. mp: 151-152 °C.

**<sup>1</sup>H NMR** (600 MHz, CDCl<sub>3</sub>) δ 7.18 (d, *J* = 8.4 Hz, 4H), 7.01 (d, *J* = 7.8 Hz, 4H), 4.16 (t, *J* = 5.4 Hz, 2H), 4.11 (t, *J* = 5.4 Hz, 2H), 3.18 (s, 4H). **<sup>13</sup>C NMR** (151 MHz, CDCl<sub>3</sub>) δ 193.4, 181.0, 136.3, 132.4, 128.7, 127.6, 119.9, 54.9, 45.4, 37.3. **HRMS** (ESI, *m/z*): Calculated for C<sub>22</sub>H<sub>16</sub>Cl<sub>2</sub>O<sub>2</sub>S<sub>2</sub> [M+Na]<sup>+</sup> 468.9861, found 468.9868.

**(1R,5S,7S)-6,7-bis(4-chlorophenyl)-3-(1,3-dithiolan-2-ylidene)bicyclo[3.2.0]heptane-2,4-dione (3g)**

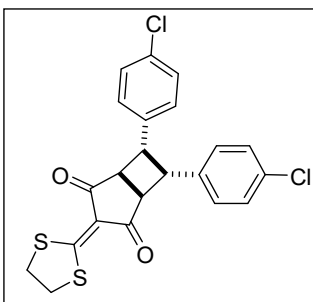

**3g** (52.2 mg, 39% yield) as yellow solid. mp: 166-168 °C.

**<sup>1</sup>H NMR** (600 MHz, CDCl<sub>3</sub>) δ 7.10 (d, *J* = 8.4 Hz, 4H), 6.90 (d, *J* = 8.4 Hz, 4H), 4.00 (d, *J* = 4.2 Hz, 2H), 3.57, (s, 4H), 3.56, (s, 2H). **<sup>13</sup>C NMR** (151 MHz, CDCl<sub>3</sub>) δ 199.9, 184.6, 137.4, 132.2, 129.2, 128.2, 121.0, 47.9, 46.4, 37.6. **HRMS** (ESI, *m/z*): Calculated for C<sub>22</sub>H<sub>16</sub>Cl<sub>2</sub>O<sub>2</sub>S<sub>2</sub> [M+Na]<sup>+</sup> 468.9861, found 468.9857.

**(1R,5S,6R,7S)-3-(1,3-dithiolan-2-ylidene)-6,7-bis(4-(trifluoromethyl)phenyl)bicyclo[3.1.1]heptane-2,4-dione (2h)**

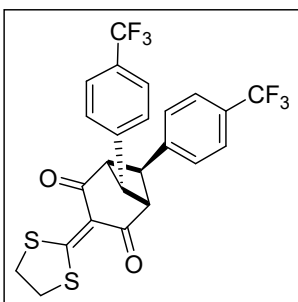

**2h** (28.7 mg, 19% yield) as yellow solid. mp: 189-191 °C.

**<sup>1</sup>H NMR** (600 MHz, CDCl<sub>3</sub>) δ 7.71 (d, *J* = 7.8 Hz, 2H), 7.60 (d, *J* = 7.8 Hz, 2H), 7.46 (d, *J* = 7.8 Hz, 2H), 7.12 (d, *J* = 8.4 Hz, 2H), 4.35 (t, *J* = 6.6 Hz, 1H), 3.95 (d, *J* = 6.6 Hz, 2H), 3.89 (s, 1H), 3.38-3.34 (m, 4H). **<sup>13</sup>C NMR** (151 MHz, CDCl<sub>3</sub>) δ 194.0, 184.0, 142.4, 142.1, 129.7 (q, *J* = 33.2 Hz), 128.8 (q, *J* = 31.7 Hz), 127.5, 126.2, 126.0 (q, *J* = 4.5 Hz), 125.5 (q, *J* = 4.5 Hz), 118.5, 55.2, 46.4, 45.8, 37.6. **HRMS** (ESI, *m/z*): Calculated for C<sub>24</sub>H<sub>16</sub>F<sub>6</sub>O<sub>2</sub>S<sub>2</sub> [M+Na]<sup>+</sup> 537.0388, found 537.0381.

**(1*r*,5*s*,6*R*,7*S*)-3-(1,3-dithiolan-2-ylidene)-6,7-bis(4-(trifluoromethyl)phenyl)bicyclo[3.1.1]heptane-2,4-dione (2h')**

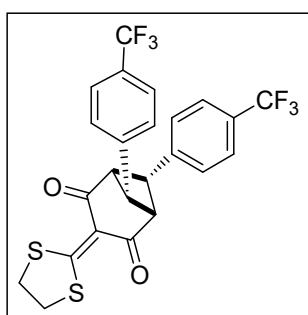

**2h'** (20.6 mg, 13% yield) as yellow solid. mp: 197-199 °C.

**<sup>1</sup>H NMR** (500 MHz, CDCl<sub>3</sub>) δ 7.48 (d, *J* = 8.0 Hz, 4H), 7.20 (d, *J* = 8.0 Hz, 4H), 4.27 (t, *J* = 5.0 Hz, 2H), 4.23-4.20 (m, 2H), 3.16 (s, 4H). **<sup>13</sup>C NMR** (126 MHz, CDCl<sub>3</sub>) δ 193.0, 181.9, 141.7, 128.9 (q, *J* = 32.8 Hz), 126.5, 125.5 (q, *J* = 3.8 Hz), 124.0 (q, *J* = 27.2 Hz), 119.6, 54.9, 45.7, 37.2. **HRMS** (ESI, *m/z*): Calculated for C<sub>24</sub>H<sub>16</sub>F<sub>6</sub>O<sub>2</sub>S<sub>2</sub> [M+N a]<sup>+</sup> 537.0388, found 537.0385.

**(1*R*,5*S*,7*S*)-3-(1,3-dithiolan-2-ylidene)-6,7-bis(4-(trifluoromethyl)phenyl)bicyclo[3.2.0]heptane-2,4-dione (3h)**

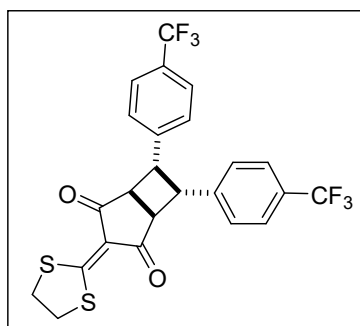

**3h** (80.2 mg, 52% yield) as yellow solid. mp: 237-238 °C.

**<sup>1</sup>H NMR** (600 MHz, CDCl<sub>3</sub>) δ 7.38 (d, *J* = 7.8 Hz, 4H), 7.10 (d, *J* = 8.4 Hz, 4H), 4.14 (d, *J* = 3.6 Hz, 2H), 3.66 (d, *J* = 4.2 Hz, 2H), 3.60 (s, 4H). **<sup>13</sup>C NMR** (151 MHz, CDCl<sub>3</sub>)



$\delta$  199.5, 185.2, 142.8, 128.7 (q,  $J = 33.2$  Hz) 128.2, 125.0 (q,  $J = 4.5$  Hz), 123.9 (q,  $J = 271.8$  Hz), 120.8, 47.7, 46.7, 37.7. **HRMS** (ESI,  $m/z$ ): Calculated for  $C_{24}H_{16}F_6O_2S_2$  [ $M + Na$ ] $^+$  537.0388, found 537.0384.

**(1*R*,5*S*,6*R*,7*S*)-3-(1,3-dithiolan-2-ylidene)-6,7-di-*m*-tolylbicyclo[3.1.1]heptane-2,4-dione (2i)**

**(1*r*,5*s*,6*r*,7*s*)-3-(1,3-dithiolan-2-ylidene)-6,7-di-*m*-tolylbicyclo[3.1.1]heptane-2,4-dione (2i')**

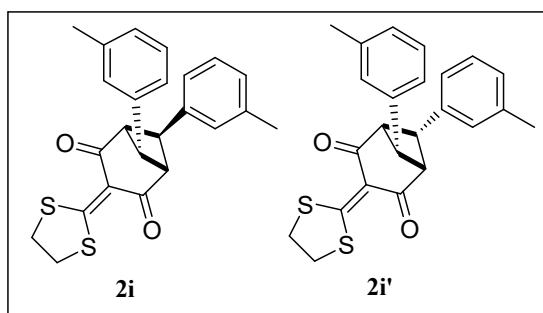

**2i/2i'** (51.2 mg, 42% yield) as yellow solid. mp: 118-119 °C, cannot be separated by column chromatography.

**2i**,  $^1H$  NMR (500 MHz,  $CDCl_3$ )  $\delta$  7.22 (t,  $J = 9.0$  Hz, 1H), 7.11 (d,  $J = 7.5$  Hz, 1H), 7.08 (d,  $J = 7.5$  Hz, 1H), 7.06 (d,  $J = 3.5$  Hz, 1H), 7.04 (d,  $J = 7.5$  Hz, 1H), 6.86 (s, 1H), 6.81 (s, 1H), 6.78 (d,  $J = 8.0$  Hz, 1H), 4.35 (t,  $J = 6.0$  Hz, 1H), 3.88 (d,  $J = 6.5$  Hz, 2H), 3.76 (s, 1H), 3.31-3.25 (m, 4H), 2.39 (s, 3H), 2.22 (s, 3H).

**2i'**,  $^1H$  NMR (500 MHz,  $CDCl_3$ )  $\delta$  7.30 (t,  $J = 7.5$  Hz, 2H), 6.91 (s, 1H), 6.88 (d,  $J = 7.5$  Hz, 5H), 4.15 (t,  $J = 5.5$  Hz, 2H), 4.11 (t,  $J = 5.5$  Hz, 2H), 3.07 (s, 4H), 2.24 (s, 6H).

**2i/2i'**,  $^{13}C$  NMR (151 MHz,  $CDCl_3$ )  $\delta$  195.2, 194.0, 181.7, 179.1, 145.1, 138.6, 138.4, 138.2, 137.8, 137.8, 128.6, 128.2, 128.1, 127.8, 127.7, 127.1, 127.1, 126.8, 126.4, 123.9, 123.1, 122.7, 120.5, 119.2, 55.4, 55.0, 46.5, 46.0, 45.9, 37.4, 37.0, 21.4, 21.3, 21.3.

**HRMS** (ESI,  $m/z$ ): Calculated for  $C_{24}H_{22}O_2S_2$  [ $M + Na$ ] $^+$  429.0953, found 429.0962.

**(1*R*,5*S*,7*S*)-3-(1,3-dithiolan-2-ylidene)-6,7-di-*m*-tolylbicyclo[3.2.0]heptane-2,4-dione (3i)**

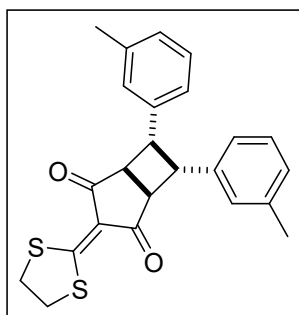

**3i** (52.4 mg, 43% yield) as yellow oil.

**<sup>1</sup>H NMR** (500 MHz, CDCl<sub>3</sub>) δ 6.97 (t, *J* = 7.5 Hz, 2H), 6.83 (t, *J* = 7.5 Hz, 4H), 6.74 (d, *J* = 7.5 Hz, 2H), 3.99 (d, *J* = 4.0 Hz, 2H), 3.62 (d, *J* = 4.0 Hz, 2H), 3.53 (s, 4H), 2.18 (s, 6H). **<sup>13</sup>C NMR** (126 MHz, CDCl<sub>3</sub>) δ 200.7, 183.7, 139.0, 137.2, 128.8, 127.6, 126.8, 125.0, 121.3, 48.0, 47.1, 37.5, 21.2. **HRMS** (ESI, *m/z*): Calculated for C<sub>24</sub>H<sub>22</sub>O<sub>2</sub>S<sub>2</sub> [M+Na]<sup>+</sup> 429.0953, found 429.0961.

**(1*R*,5*S*,6*R*,7*S*)-3-(1,3-dithiolan-2-ylidene)-6,7-bis(3-methoxyphenyl)bicyclo[3.1.1]heptane-2,4-dione (2j)**

**(1*r*,5*s*,6*r*,7*s*)-3-(1,3-dithiolan-2-ylidene)-6,7-bis(3-methoxyphenyl)bicyclo[3.1.1]heptane-2,4-dione (2j')**

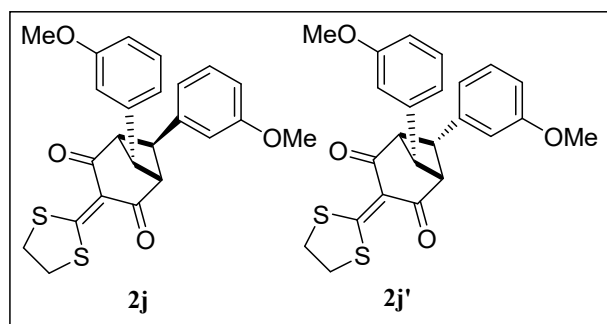

**2j/2j'** (43.4 mg, 33% yield) as yellow oil, cannot be separated by column chromatography.

**2j**, **<sup>1</sup>H NMR** (500 MHz, CDCl<sub>3</sub>) δ 7.34 (t, *J* = 8.0 Hz, 1H), 7.12 (d, *J* = 7.5 Hz, 1H), 7.08 (d, *J* = 8.0 Hz, 1H), 7.05 (d, *J* = 7.5 Hz, 1H), 6.98 (s, 1H), 6.86-6.84 (m, 1H), 6.58 (d, *J* = 7.0 Hz, 1H), 6.52 (s, 1H), 4.38 (t, *J* = 6.0 Hz, 1H), 3.89 (d, *J* = 6.5 Hz, 2H), 3.84 (s, 3H), 3.79 (s, 1H), 3.71 (s, 3H), 3.35-3.30 (m, 4H).

**2j'**, **<sup>1</sup>H NMR** (500 MHz, CDCl<sub>3</sub>) δ 7.10 (d, *J* = 3.0 Hz, 1H), 6.68-6.63 (m, 5H), 6.61 (s, 2H), 4.19 (t, *J* = 6.0 Hz, 2H), 4.13 (t, *J* = 6.0 Hz, 2H), 3.73 (s, 6H), 3.13 (s, 4H).

**2j/2j'**, **<sup>13</sup>C NMR** (151 MHz, CDCl<sub>3</sub>) δ 195.1, 193.8, 182.0, 179.5, 160.1, 159.5, 140.2, 139.9, 139.4, 129.9, 129.5, 129.5, 120.5, 119.2, 119.2, 118.6, 118.2, 113.0, 112.8, 112.8, 112.5, 111.2, 110.7, 55.5, 55.3, 55.2, 55.2, 55.1, 46.5, 46.2, 46.0, 37.5, 37.1. **HRMS** (ESI, *m/z*): Calculated for C<sub>24</sub>H<sub>22</sub>O<sub>4</sub>S<sub>2</sub> [M+Na]<sup>+</sup> 461.0852, found 461.0854.

**(1*R*,5*S*,7*S*)-3-(1,3-dithiolan-2-ylidene)-6,7-bis(3-methoxyphenyl)bicyclo[3.2.0]heptane-2,4-dione (3j)**

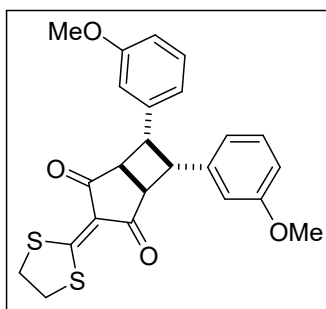

**3j** (44.5 mg, 34% yield) as yellow oil.

$^1\text{H NMR}$  (600 MHz,  $\text{CDCl}_3$ )  $\delta$  7.04 (t,  $J = 7.8$  Hz, 2H), 6.63 (d,  $J = 7.8$  Hz, 2H), 6.61-6.60 (m, 2H), 6.50 (s, 2H), 4.01 (d,  $J = 3.6$  Hz, 2H), 3.63 (s, 6H), 3.62 (d,  $J = 4.2$  Hz, 2H), 3.57 (s, 4H).  $^{13}\text{C NMR}$  (151 MHz,  $\text{CDCl}_3$ )  $\delta$  200.3, 183.9, 159.1, 140.8, 128.8, 121.1, 120.4, 113.6, 111.9, 55.0, 48.0, 47.1, 37.5. **HRMS** (ESI,  $m/z$ ): Calculated for  $\text{C}_{24}\text{H}_{22}\text{O}_4\text{S}_2$   $[\text{M}+\text{Na}]^+$  461.0852, found 461.0852.

**(1R,5S,6R,7S)-3-(1,3-dithiolan-2-ylidene)-6,7-bis(3-isopropylphenyl)bicyclo[3.1.1]heptane-2,4-dione (2k)**

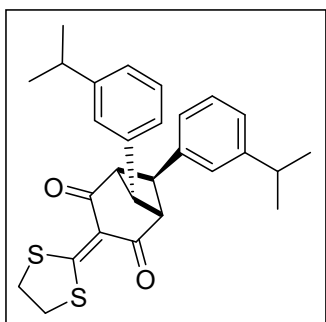

**2k** (34.7 mg, 25% yield) as yellow solid. mp: 149-150 °C.

$^1\text{H NMR}$  (500 MHz,  $\text{CDCl}_3$ )  $\delta$  7.35 (t,  $J = 7.5$  Hz, 1H), 7.29 (d,  $J = 9.5$  Hz, 2H), 7.18 (d,  $J = 7.5$  Hz, 1H), 7.10 (t,  $J = 7.5$  Hz, 1H), 6.95 (d,  $J = 7.5$  Hz, 1H), 6.85 (s, 1H), 6.82 (d,  $J = 7.0$  Hz, 1H), 4.41 (t,  $J = 6.5$  Hz, 1H), 3.91 (d,  $J = 6.5$  Hz, 2H), 3.80 (s, 1H), 3.35-3.24 (m, 4H), 2.98-2.90 (m, 1H), 2.82-2.74 (m, 1H), 1.28 (d,  $J = 7.0$  Hz, 6H), 1.15 (d,  $J = 7.0$  Hz, 6H).  $^{13}\text{C NMR}$  (151 MHz,  $\text{CDCl}_3$ )  $\delta$  195.4, 181.5, 149.6, 148.8, 138.7, 138.3, 128.8, 128.3, 125.4, 125.1, 124.4, 124.3, 124.0, 123.3, 119.5, 55.6, 46.5, 46.2, 37.4, 34.2, 34.0, 24.0, 23.9. **HRMS** (ESI,  $m/z$ ): Calculated for  $\text{C}_{28}\text{H}_{30}\text{O}_2\text{S}_2$   $[\text{M}+\text{Na}]^+$  485.1579, found 485.1586.

**(1r,5s,6R,7S)-3-(1,3-dithiolan-2-ylidene)-6,7-bis(3-isopropylphenyl)bicyclo[3.1.1]heptane-2,4-dione (2k')**

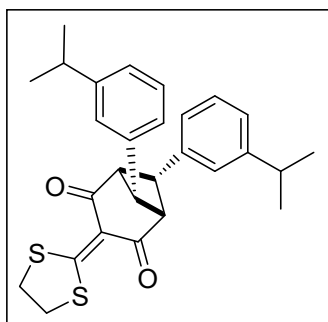

**2k'** (33.3 mg, 24% yield) as yellow solid. mp: 156-157 °C.

<sup>1</sup>H NMR (500 MHz, CDCl<sub>3</sub>) δ 7.12 (t, *J* = 7.5 Hz, 2H), 6.96 (d, *J* = 8.0 Hz, 2H), 6.93 (s, 2H), 6.90 (d, *J* = 8.0 Hz, 2H), 4.21 (t, *J* = 6.0 Hz, 2H), 4.14 (t, *J* = 6.0 Hz, 2H), 3.06 (s, 4H), 2.84-2.76 (m, 2H), 1.16 (d, *J* = 7.0 Hz, 12H). <sup>13</sup>C NMR (151 MHz, CDCl<sub>3</sub>) δ 194.0, 178.8, 148.8, 137.9, 128.3, 124.4, 124.4, 123.7, 120.8, 55.3, 46.1, 37.0, 34.0, 23.8. HRMS (ESI, *m/z*): Calculated for C<sub>28</sub>H<sub>30</sub>O<sub>2</sub>S<sub>2</sub> [M+Na]<sup>+</sup> 485.1579, found 485.1583.

**(1*R*,5*S*,7*S*)-3-(1,3-dithiolan-2-ylidene)-6,7-bis(3-isopropylphenyl)bicyclo[3.2.0]heptane-2,4-dione (3k)**

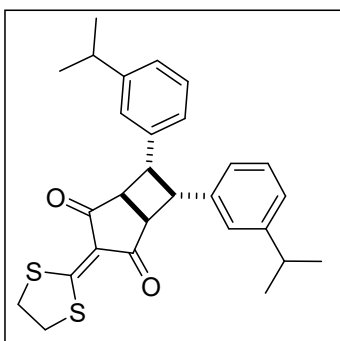

**3k** (63.8 mg, 46% yield) as brown oil.

<sup>1</sup>H NMR (600 MHz, CDCl<sub>3</sub>) δ 7.03 (t, *J* = 7.2 Hz, 2H), 6.86 (d, *J* = 8.4 Hz, 4H), 6.67 (s, 2H), 4.02 (d, *J* = 4.2 Hz, 2H), 3.64 (d, *J* = 4.2 Hz, 2H), 3.51 (s, 4H), 2.70-2.63 (m, 2H), 1.03-1.01 (m, 12H). <sup>13</sup>C NMR (151 MHz, CDCl<sub>3</sub>) δ 200.6, 183.6, 148.1, 139.0, 127.7, 126.3, 125.2, 124.0, 121.2, 47.9, 47.2, 37.5, 33.8, 23.7. HRMS (ESI, *m/z*): Calculated for C<sub>28</sub>H<sub>30</sub>O<sub>2</sub>S<sub>2</sub> [M+Na]<sup>+</sup> 485.1579, found 485.1582.

**(1*R*,5*S*,6*R*,7*S*)-6,7-bis(3-(*tert*-butyl)phenyl)-3-(1,3-dithiolan-2-ylidene)bicyclo[3.1.1]heptane-2,4-dione (2l)**

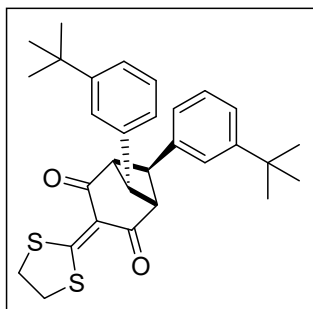

**2I** (28.7 mg, 19% yield) as yellow solid. mp: 174-175 °C.

<sup>1</sup>H NMR (500 MHz, CDCl<sub>3</sub>) δ 7.46 (s, 1H), 7.36 (d, *J* = 7.5 Hz, 2H), 7.30 (d, *J* = 7.5 Hz, 1H), 7.12 (d, *J* = 6.0 Hz, 2H), 7.01 (s, 1H), 6.82 (d, *J* = 6.0 Hz, 1H), 4.44 (t, *J* = 6.0 Hz, 1H), 3.92 (d, *J* = 6.0 Hz, 2H), 3.82 (s, 1H), 3.33-3.29 (m, 2H), 3.28-3.24 (m, 2H), 1.35 (s, 9H), 1.22 (s, 9H). <sup>13</sup>C NMR (151 MHz, CDCl<sub>3</sub>) δ 195.4, 181.4, 151.8, 151.0, 138.3, 138.0, 128.4, 128.1, 124.2, 124.0, 123.9, 123.2, 123.0, 123.0, 119.5, 55.6, 46.6, 46.3, 37.4, 34.8, 34.6, 31.4, 31.2. HRMS (ESI, *m/z*): Calculated for C<sub>30</sub>H<sub>34</sub>O<sub>2</sub>S<sub>2</sub> [M+Na]<sup>+</sup> 513.1892, found 513.1880.

**(1*r*,5*s*,6*R*,7*S*)-6,7-bis(3-(*tert*-butyl)phenyl)-3-(1,3-dithiolan-2-ylidene)bicyclo[3.1.1]heptane-2,4-dione (2I')**

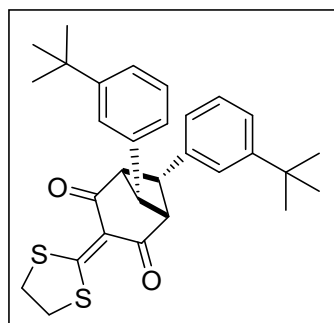

**2I'** (39.0 mg, 26% yield) as yellow solid. mp: 191-192 °C.

<sup>1</sup>H NMR (500 MHz, CDCl<sub>3</sub>) δ 7.15-7.11 (m, 4H), 7.08 (s, 2H), 6.91 (d, *J* = 6.5 Hz, 2H), 4.23 (t, *J* = 5.5 Hz, 2H), 4.15 (t, *J* = 6.0 Hz, 2H), 3.04 (s, 4H), 1.23 (s, 18H). <sup>13</sup>C NMR (151 MHz, CDCl<sub>3</sub>) δ 194.0, 178.7, 151.0, 137.5, 128.1, 123.5, 123.4, 123.1, 120.8, 55.3, 46.2, 37.0, 34.6, 31.2. HRMS (ESI, *m/z*): Calculated for C<sub>30</sub>H<sub>34</sub>O<sub>2</sub>S<sub>2</sub> [M+Na]<sup>+</sup> 513.1892, found 513.1885.

**(1*R*,5*S*,7*S*)-6,7-bis(3-(*tert*-butyl)phenyl)-3-(1,3-dithiolan-2-ylidene)bicyclo[3.2.0]heptane-2,4-dione (3I)**

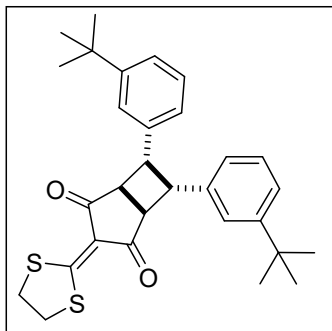

**3I** (66.2 mg, 45% yield) as yellow oil.

$^1\text{H NMR}$  (500 MHz,  $\text{CDCl}_3$ )  $\delta$  7.09-7.03 (m, 4H), 6.91 (d,  $J = 7.0$  Hz, 2H), 6.76 (s, 2H), 4.06 (d,  $J = 4.0$  Hz, 2H), 3.65 (d,  $J = 4.0$  Hz, 2H), 3.57 (s, 4H), 1.07 (s, 18H).  $^{13}\text{C NMR}$  (151 MHz,  $\text{CDCl}_3$ )  $\delta$  200.8, 183.5, 150.4, 138.9, 127.6, 125.5, 124.9, 123.0, 121.5, 48.3, 47.4, 37.6, 34.3, 31.2. **HRMS** (ESI,  $m/z$ ): Calculated for  $\text{C}_{30}\text{H}_{34}\text{O}_2\text{S}_2$  [ $\text{M}+\text{Na}$ ] $^+$  513.1892, found 513.1890.

**(1*R*,5*S*,6*R*,7*S*)-6,7-bis(3-chlorophenyl)-3-(1,3-dithiolan-2-ylidene)bicyclo[3.1.1]heptane-2,4-dione (2m)**

**(1*r*,5*s*,6*R*,7*S*)-6,7-bis(3-chlorophenyl)-3-(1,3-dithiolan-2-ylidene)bicyclo[3.1.1]heptane-2,4-dione (2m')**

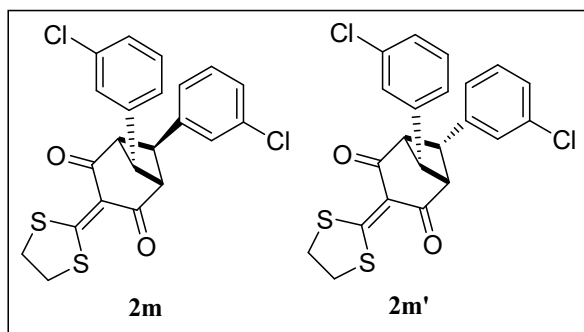

**2m/2m'** (45.5 mg, 34% yield) as yellow solid. mp: 215-216 °C, cannot be separated by column chromatography.

**2m**,  $^1\text{H NMR}$  (500 MHz,  $\text{CDCl}_3$ )  $\delta$  7.38-7.30 (m, 3H), 7.17-7.07 (m, 5H), 4.30 (t,  $J = 6.5$  Hz, 1H), 3.79 (s, 1H), 3.36 (d,  $J = 3.5$  Hz, 4H), 3.17 (s, 2H).

**2m'**,  $^1\text{H NMR}$  (500 MHz,  $\text{CDCl}_3$ )  $\delta$  7.44 (s, 2H), 7.00 (s, 2H), 6.96 (d,  $J = 7.5$  Hz, 2H), 6.88 (d,  $J = 7.5$  Hz, 2H), 4.16 (t,  $J = 5.5$  Hz, 2H), 4.11 (t,  $J = 5.5$  Hz, 2H), 3.87 (d,  $J = 6.5$  Hz, 4H).

**2m/2m'**,  $^{13}\text{C NMR}$  (151 MHz,  $\text{CDCl}_3$ )  $\delta$  194.2, 193.0, 183.3, 181.1, 140.4, 140.1, 139.7, 135.0, 134.4, 130.2, 129.8, 127.5, 127.3, 127.0, 126.9, 126.4, 126.0, 125.2, 124.4, 124.0, 118.7, 55.2, 54.8, 46.2, 45.6, 45.5, 37.6, 37.2. **HRMS** (ESI,  $m/z$ ): Calculated for  $\text{C}_{22}$

H<sub>16</sub>Cl<sub>2</sub>O<sub>2</sub>S<sub>2</sub> [M+Na]<sup>+</sup> 468.9861, found 468.9857.

**(1*R*,5*S*,7*S*)-6,7-bis(3-chlorophenyl)-3-(1,3-dithiolan-2-ylidene)bicyclo[3.2.0]heptane-2,4-dione (3m)**

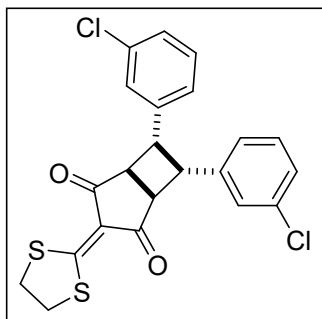

**3m** (50.8 mg, 38% yield) as yellow oil.

<sup>1</sup>H NMR (500 MHz, CDCl<sub>3</sub>) δ 7.07-7.03 (m, 4H), 7.00 (s, 2H), 6.85-6.82 (m, 2H), 4.00 (d, *J* = 4.0 Hz, 2H), 3.61 (d, *J* = 4.0 Hz, 2H), 3.58 (s, 4H). <sup>13</sup>C NMR (151 MHz, CDCl<sub>3</sub>) δ 199.8, 184.8, 140.8, 133.9, 129.2, 128.0, 126.6, 126.1, 120.9, 47.5, 46.7, 37.7. HR MS (ESI, *m/z*): Calculated for C<sub>22</sub>H<sub>16</sub>Cl<sub>2</sub>O<sub>2</sub>S<sub>2</sub> [M+Na]<sup>+</sup> 468.9861, found 468.9851.

**(1*R*,5*S*,6*R*,7*S*)-3-(1,3-dithiolan-2-ylidene)-6,7-bis(3-fluorophenyl)bicyclo[3.1.1]heptane-2,4-dione (2n)**

**(1*r*,5*s*,6*R*,7*S*)-3-(1,3-dithiolan-2-ylidene)-6,7-bis(3-fluorophenyl)bicyclo[3.1.1]heptane-2,4-dione (2n')**

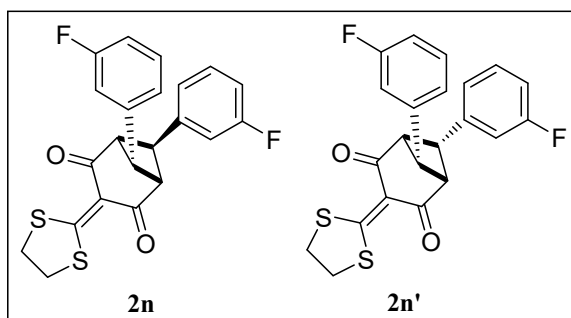

**2n/2n'** (36.0 mg, 29% yield) as yellow solid. mp: 182-183 °C, cannot be separated by column chromatography.

**2n**, <sup>1</sup>H NMR (500 MHz, CDCl<sub>3</sub>) δ 7.42-7.38 (m, 1H), 7.24 (d, *J* = 7.5 Hz, 1H), 7.02 (t, *J* = 8.5 Hz, 1H), 6.81-6.77 (m, 4H), 6.71 (d, *J* = 9.0 Hz, 1H), 4.32 (t, *J* = 6.0 Hz, 1H), 3.87 (d, *J* = 6.5 Hz, 2H), 3.80 (s, 1H), 3.36-3.31 (m, 4H).

**2n'**, <sup>1</sup>H NMR (500 MHz, CDCl<sub>3</sub>) δ 7.20-7.13 (m, 5H), 6.86 (d, *J* = 7.5 Hz, 2H), 6.77 (s, 1H), 4.19 (t, *J* = 6.0 Hz, 2H), 4.12 (t, *J* = 5.5 Hz, 2H), 3.15 (s, 4H).

**2n/2n'**, <sup>13</sup>C NMR (151 MHz, CDCl<sub>3</sub>) δ 194.2, 193.1, 183.1, 180.8, 163.1, 162.6, 141.0, 140.9, 140.6, 140.2, 130.4, 130.0, 122.6, 121.8, 121.5, 119.8, 118.7, 114.2, 114.1, 1

13.6, 113.6, 113.2, 112.9, 55.2, 54.8, 46.1, 45.7, 45.4, 37.5, 37.1. **HRMS** (ESI, m/z): Calculated for C<sub>22</sub>H<sub>16</sub>F<sub>2</sub>O<sub>2</sub>S<sub>2</sub> [M+Na]<sup>+</sup> 437.0452, found 437.0452.

**(1*R*,5*S*,7*S*)-3-(1,3-dithiolan-2-ylidene)-6,7-bis(3-fluorophenyl)bicyclo[3.2.0]heptane-2,4-dione (3n)**

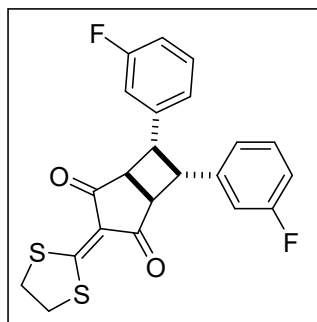

**3n** (38.5 mg, 31% yield) as yellow oil.

**<sup>1</sup>H NMR** (500 MHz, CDCl<sub>3</sub>) δ 7.11-7.06 (m, 2H), 6.78-6.74 (m, 4H), 6.70 (t, *J* = 2.0 Hz, 1H), 6.68 (t, *J* = 2.0 Hz, 1H), 4.03 (d, *J* = 4.5 Hz, 2H), 3.61 (d, *J* = 4.5 Hz, 2H), 3.58 (s, 4H). **<sup>13</sup>C NMR** (151 MHz, CDCl<sub>3</sub>) δ 199.8, 184.7, 162.5, 141.4, 129.5, 123.6, 121.0, 114.8, 113.3, 47.6, 46.8, 37.6. **HRMS** (ESI, m/z): Calculated for C<sub>22</sub>H<sub>16</sub>F<sub>2</sub>O<sub>2</sub>S<sub>2</sub> [M+Na]<sup>+</sup> 437.0452, found 437.0459.

**(1*R*,5*S*,6*R*,7*S*)-3-(1,3-dithiolan-2-ylidene)-6,7-bis(3-iodophenyl)bicyclo[3.1.1]heptane-2,4-dione(2o)**

**(1*r*,5*s*,6*R*,7*S*)-3-(1,3-dithiolan-2-ylidene)-6,7-bis(3-iodophenyl)bicyclo[3.1.1]heptane-2,4-dione (2o')**

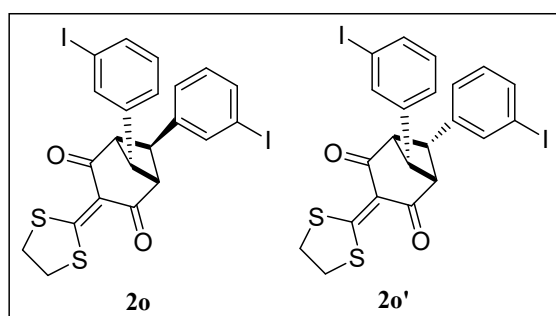

**2o/2o'** (45.4 mg, 24% yield) as yellow solid. mp: 151-153 °C, cannot be separated by column chromatography.

**2o**, **<sup>1</sup>H NMR** (500 MHz, CDCl<sub>3</sub>) δ 7.80 (s, 1H), 7.66 (d, *J* = 8.0 Hz, 1H), 7.45 (d, *J* = 8.5 Hz, 1H), 7.41 (d, *J* = 7.0 Hz, 1H), 7.35 (s, 1H), 7.16 (t, *J* = 8.0 Hz, 1H), 6.96 (d, *J* = 7.5 Hz, 1H), 6.92 (t, *J* = 8.0 Hz, 1H), 4.28 (t, *J* = 6.5 Hz, 1H), 3.84 (d, *J* = 6.5 Hz, 2H), 3.76 (s, 1H), 3.37-3.34 (m, 4H).

**2o'**, **<sup>1</sup>H NMR** (500 MHz, CDCl<sub>3</sub>) δ 7.90 (s, 1H), 7.73 (d, *J* = 8.5 Hz, 1H), 7.60 (s, 1H),



7.05-7.02 (m, 5H), 4.08 (t,  $J = 6.0$  Hz, 4H), 3.73 (s, 4H).

**2o/2o'**,  $^{13}\text{C}$  NMR (126 MHz,  $\text{CDCl}_3$ )  $\delta$  194.2, 183.3, 140.7, 140.5, 136.3, 136.2, 136.1, 135.8, 135.8, 135.2, 134.9, 130.6, 130.1, 126.3, 125.5, 125.1, 118.7, 94.9, 94.5, 60.4, 55.1, 54.8, 46.0, 45.4, 45.3, 37.6, 37.3, 21.0, 15.2, 14.2. **HRMS** (ESI,  $m/z$ ): Calculated for  $\text{C}_{22}\text{H}_{17}\text{I}_2\text{O}_2\text{S}_2$   $[\text{M}+\text{Na}]^+$  630.8754, found 630.8760.

**(1*R*,5*S*,7*S*)-3-(1,3-dithiolan-2-ylidene)-6,7-bis(3-iodophenyl)bicyclo[3.2.0]heptane-2,4-dione (3o)**

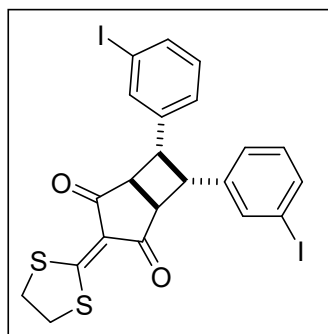

**3o** (62.4 mg, 33% yield) as yellow solid. mp: 198-200 °C.

$^1\text{H}$  NMR (500 MHz,  $\text{CDCl}_3$ )  $\delta$  7.40 (d,  $J = 7.5$  Hz, 2H), 7.34 (s, 2H), 6.89 (d,  $J = 7.5$  Hz, 2H), 6.85 (t,  $J = 7.5$  Hz, 2H), 3.95 (d,  $J = 4.0$  Hz, 2H), 3.58 (s, 6H).  $^{13}\text{C}$  NMR (151 MHz,  $\text{CDCl}_3$ )  $\delta$  199.8, 184.7, 141.0, 137.0, 135.5, 129.6, 127.2, 121.0, 94.0, 47.3, 46.6, 37.7. **HRMS** (ESI,  $m/z$ ): Calculated for  $\text{C}_{22}\text{H}_{17}\text{I}_2\text{O}_2\text{S}_2$   $[\text{M}+\text{Na}]^+$  630.8754, found 630.8758.

**(1*R*,5*S*,6*R*,7*S*)-3-(1,3-dithiolan-2-ylidene)-6,7-di-*o*-tolylbicyclo[3.1.1]heptane-2,4-dione (2p)**

**(1*r*,5*s*,6*R*,7*S*)-3-(1,3-dithiolan-2-ylidene)-6,7-di-*o*-tolylbicyclo[3.1.1]heptane-2,4-dione (2p')**

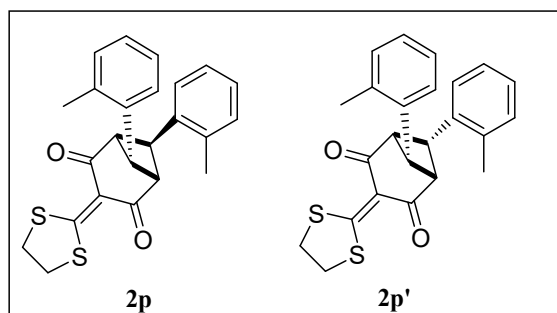

**2p/2p'** (34.1 mg, 28% yield) as yellow solid. mp: 88-90 °C, cannot be separated by column chromatography.

**2p**,  $^1\text{H}$  NMR (600 MHz,  $\text{CDCl}_3$ )  $\delta$  7.49 (d,  $J = 7.2$  Hz, 1H), 7.26 (d,  $J = 3.0$  Hz, 2H),

7.04 (s, 1H), 7.02 (t,  $J = 4.8$  Hz, 3H), 6.94 (d,  $J = 7.8$  Hz, 1H), 4.46 (t,  $J = 6.0$  Hz, 1H), 3.89 (d,  $J = 6.0$  Hz, 2H), 3.76 (s, 1H), 3.35-3.29 (m, 4H), 2.30 (s, 3H), 2.25 (s, 3H).

**2p'**,  $^1\text{H NMR}$  (600 MHz,  $\text{CDCl}_3$ )  $\delta$  7.05 (d,  $J = 3.0$  Hz, 4H), 7.00-6.98 (m, 4H), 4.25 (t,  $J = 5.4$  Hz, 2H), 4.16 (t,  $J = 5.4$  Hz, 2H), 3.13 (s, 4H), 2.36 (s, 6H).

**2p/2p'**,  $^{13}\text{C NMR}$  (151 MHz,  $\text{CDCl}_3$ )  $\delta$  195.4, 194.2, 181.9, 179.5, 137.5, 136.6, 136.3, 136.0, 135.9, 135.8, 130.9, 130.6, 130.5, 127.3, 127.0, 126.8, 126.4, 126.2, 125.6, 125.5, 125.4, 120.0, 118.9, 56.1, 54.9, 47.2, 46.0, 45.7, 43.4, 37.5, 37.1, 20.2, 20.1, 19.3. **HRMS** (ESI,  $m/z$ ): Calculated for  $\text{C}_{24}\text{H}_{22}\text{O}_2\text{S}_2$   $[\text{M}+\text{Na}]^+$  429.0953, found 429.0950.

**(1*R*,5*S*,7*S*)-3-(1,3-dithiolan-2-ylidene)-6,7-di-*o*-tolylbicyclo[3.2.0]heptane-2,4-dione (3p)**

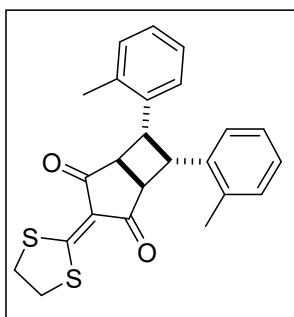

**3p** (48.7 mg, 40% yield) as yellow solid. mp: 235-236 °C.

$^1\text{H NMR}$  (500 MHz,  $\text{CDCl}_3$ )  $\delta$  7.21-7.19 (m, 2H), 7.03-6.97 (m, 4H), 6.95-6.93 (m, 2H), 4.22 (d,  $J = 4.5$  Hz, 2H), 3.63 (d,  $J = 4.5$  Hz, 2H), 3.56 (s, 4H), 2.08 (s, 6H).  $^{13}\text{C NMR}$  (151 MHz,  $\text{CDCl}_3$ )  $\delta$  200.8, 183.7, 137.4, 135.9, 130.0, 126.9, 126.4, 125.5, 121.5, 48.1, 44.3, 37.6, 19.6. **HRMS** (ESI,  $m/z$ ): Calculated for  $\text{C}_{24}\text{H}_{22}\text{O}_2\text{S}_2$   $[\text{M}+\text{Na}]^+$  429.0953, found 429.0944.

**(1*R*,5*S*,6*R*,7*S*)-3-(1,3-dithiolan-2-ylidene)-6,7-bis(2-methoxyphenyl)bicyclo[3.1.1]heptane-2,4-dione (2q)**

**(1*r*,5*s*,6*R*,7*S*)-3-(1,3-dithiolan-2-ylidene)-6,7-bis(2-methoxyphenyl)bicyclo[3.1.1]heptane-2,4-dione (2q')**

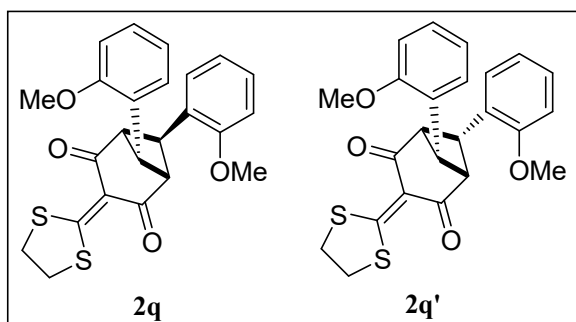

**2q/2q'** (31.5 mg, 24% yield) as yellow solid. mp: 218-219 °C, cannot be separated by column chromatography.

**2q**, <sup>1</sup>H NMR (500 MHz, CDCl<sub>3</sub>) δ 7.49 (d, *J* = 7.0 Hz, 1H), 7.31 (t, *J* = 8.0 Hz, 1H), 7.05-7.01 (m, 2H), 6.92 (d, *J* = 8.0 Hz, 2H), 6.72 (d, *J* = 8.0 Hz, 2H), 4.35 (t, *J* = 6.5 Hz, 1H), 3.86 (d, *J* = 6.5 Hz, 6H), 3.76 (s, 3H), 3.32-3.25 (m, 4H).

**2q'**, <sup>1</sup>H NMR (500 MHz, CDCl<sub>3</sub>) δ 7.10 (t, *J* = 7.5 Hz, 2H), 6.96 (d, *J* = 7.0 Hz, 2H), 6.75 (t, *J* = 7.5 Hz, 4H), 4.20 (t, *J* = 6.0 Hz, 2H), 4.13 (t, *J* = 5.5 Hz, 2H), 3.83 (s, 6H), 3.10 (s, 4H).

**2q/2q'**, <sup>13</sup>C NMR (151 MHz, CDCl<sub>3</sub>) δ 196.0, 194.9, 177.6, 158.2, 157.6, 157.4, 128.2, 127.8, 127.8, 127.6, 127.4, 127.2, 127.0, 126.6, 126.6, 126.2, 120.8, 120.2, 120.0, 120.0, 119.6, 110.4, 110.3, 110.2, 56.0, 55.4, 55.3, 55.2, 54.7, 45.0, 44.1, 43.7, 37.3, 37.0. **HRMS** (ESI, *m/z*): Calculated for C<sub>24</sub>H<sub>22</sub>O<sub>4</sub>S<sub>2</sub> [M+Na]<sup>+</sup> 461.0852, found 461.0847.

**(1*R*,5*S*,7*S*)-3-(1,3-dithiolan-2-ylidene)-6,7-bis(2-methoxyphenyl)bicyclo[3.2.0]heptane-2,4-dione (3q)**

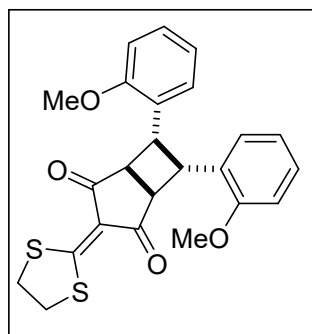

**3q** (53.9 mg, 41% yield) as yellow solid. mp: 218-219 °C.

<sup>1</sup>H NMR (500 MHz, CDCl<sub>3</sub>) δ 7.14-7.12 (m, 2H), 7.00-6.96 (m, 2H), 6.74 (t, *J* = 7.5 Hz, 2H), 6.48 (d, *J* = 8.0 Hz, 2H), 4.25 (d, *J* = 4.0 Hz, 2H), 3.73 (d, *J* = 4.0 Hz, 2H), 3.52 (s, 4H), 3.49 (s, 6H). <sup>13</sup>C NMR (151 MHz, CDCl<sub>3</sub>) δ 201.6, 182.8, 156.7, 128.6, 127.8, 127.2, 121.8, 119.3, 109.2, 54.6, 46.7, 43.0, 37.4. **HRMS** (ESI, *m/z*): Calculated for C<sub>24</sub>H<sub>22</sub>O<sub>4</sub>S<sub>2</sub> [M+Na]<sup>+</sup> 461.0852, found 461.0848.

**(1*R*,5*S*,6*R*,7*S*)-6,7-bis(2-chlorophenyl)-3-(1,3-dithiolan-2-ylidene)bicyclo[3.1.1]heptane-2,4-dione (2r)**

**(1*r*,5*s*,6*R*,7*S*)-6,7-bis(2-chlorophenyl)-3-(1,3-dithiolan-2-ylidene)bicyclo[3.1.1]heptane-2,4-dione (2r')**

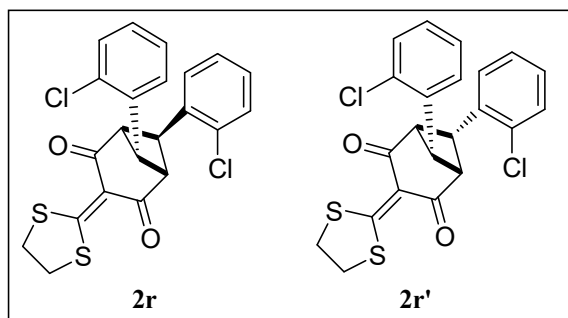

**2r/2r'** (49.5 mg, 37% yield) as yellow solid. mp: 210-211 °C, cannot be separated by column chromatography.

**2r**,  $^1\text{H NMR}$  (600 MHz,  $\text{CDCl}_3$ )  $\delta$  7.99 (d,  $J = 16.2$  Hz, 0.5H), 7.67 (d,  $J = 7.8$  Hz, 0.5 H), 7.60 (d,  $J = 7.8$  Hz, 1H), 7.47 (d,  $J = 7.2$  Hz, 1H), 7.42 (d,  $J = 7.8$  Hz, 1H), 7.38 (t,  $J = 7.8$  Hz, 1.5H), 7.03 (d,  $J = 7.2$  Hz, 1.5H), 6.96 (d,  $J = 15.6$  Hz, 1H), 4.40 (t,  $J = 6.0$  Hz, 1H), 4.05 (d,  $J = 6.0$  Hz, 2H), 3.90 (s, 1H), 3.38-3.32 (m, 4H).

**2r'**,  $^1\text{H NMR}$  (600 MHz,  $\text{CDCl}_3$ )  $\delta$  7.28 (d,  $J = 7.8$  Hz, 2H), 7.12-7.07 (m, 6H), 4.45 (t,  $J = 5.4$  Hz, 2H), 4.22 (t,  $J = 5.4$  Hz, 2H), 3.18 (s, 4H).

**2r/2r'**,  $^{13}\text{C NMR}$  (151 MHz,  $\text{CDCl}_3$ )  $\delta$  194.4, 193.5, 180.6, 135.1, 133.6, 130.2, 129.9, 129.8, 128.7, 128.4, 128.4, 128.4, 128.0, 127.2, 127.1, 126.5, 126.4, 119.8, 60.4, 55.7, 54.3, 46.7, 46.0, 45.6, 37.9, 37.6, 37.2, 14.2. **HRMS** (ESI,  $m/z$ ): Calculated for  $\text{C}_{22}\text{H}_{16}\text{Cl}_2\text{O}_2\text{S}_2$   $[\text{M}+\text{Na}]^+$  468.9861, found 468.9861.

**(1R,5S,7S)-6,7-bis(2-chlorophenyl)-3-(1,3-dithiolan-2-ylidene)bicyclo[3.2.0]heptane-2,4-dione (3r)**

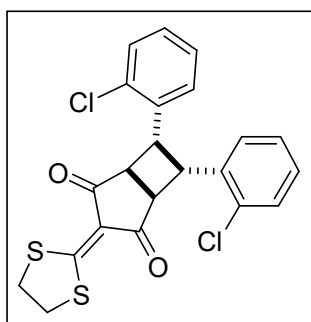

**3r** (57.5 mg, 43% yield) as yellow solid. mp: 171-173 °C.

$^1\text{H NMR}$  (600 MHz,  $\text{CDCl}_3$ )  $\delta$  7.23-7.22 (m, 2H), 7.14-7.12 (m, 2H), 7.07-7.04 (m, 2 H), 7.01-6.98 (m, 2H), 4.54 (d,  $J = 4.2$  Hz, 2H), 3.65 (d,  $J = 3.6$  Hz, 2H), 3.58 (s, 4H).

$^{13}\text{C NMR}$  (151 MHz,  $\text{CDCl}_3$ )  $\delta$  200.0, 184.8, 136.2, 134.4, 129.3, 128.6, 127.8, 126.0, 121.1, 46.9, 44.2, 37.7. **HRMS** (ESI,  $m/z$ ): Calculated for  $\text{C}_{22}\text{H}_{16}\text{Cl}_2\text{O}_2\text{S}_2$   $[\text{M}+\text{Na}]^+$  468.9861, found 468.9861.

**(1R,5S,6R,7S)-6,7-bis(3,5-dimethylphenyl)-3-(1,3-dithiolan-2-ylidene)bicyclo[3.1.**

### 1]heptane-2,4-dione (2s)

### (1*r*,5*s*,6*R*,7*S*)-6,7-bis(3,5-dimethylphenyl)-3-(1,3-dithiolan-2-ylidene)bicyclo[3.1.1]heptane-2,4-dione (2s')

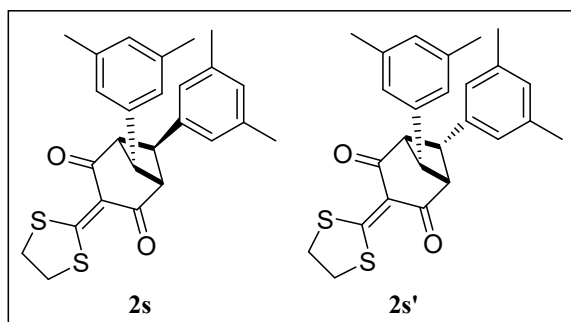

**2s/2s'** (40.4 mg, 31% yield) as yellow solid. mp: 209-210 °C, cannot be separated by column chromatography.

**2s**, <sup>1</sup>H NMR (600 MHz, CDCl<sub>3</sub>) δ 7.06 (s, 2H), 6.93 (s, 1H), 6.71 (s, 1H), 6.61 (s, 2H), 4.31 (t, *J* = 6.0 Hz, 1H), 3.86 (d, *J* = 6.0 Hz, 2H), 3.71 (s, 1H), 3.32-3.27 (m, 4H), 2.20 (s, 12H).

**2s'**, <sup>1</sup>H NMR (600 MHz, CDCl<sub>3</sub>) δ 6.73 (s, 2H), 6.68 (s, 4H), 4.09 (t, *J* = 4.8 Hz, 2H), 4.06 (t, *J* = 4.8 Hz, 2H), 3.09 (s, 4H), 2.34 (s, 6H), 2.18 (s, 6H).

**2s/2s'**, <sup>13</sup>C NMR (151 MHz, CDCl<sub>3</sub>) δ 195.4, 194.0, 181.4, 178.6, 138.6, 138.3, 138.2, 137.8, 137.7, 128.6, 128.1, 128.0, 125.0, 124.8, 123.9, 123.5, 120.6, 119.3, 55.5, 55.1, 46.5, 46.0, 45.9, 37.4, 37.0, 21.3, 21.2, 21.2. **HRMS** (ESI, *m/z*): Calculated for C<sub>26</sub>H<sub>26</sub>O<sub>2</sub>S<sub>2</sub> [M+Na]<sup>+</sup> 457.1266, found 457.1274.

### (1*R*,5*S*,7*S*)-6,7-bis(3,5-dimethylphenyl)-3-(1,3-dithiolan-2-ylidene)bicyclo[3.2.0]heptane-2,4-dione (3s)

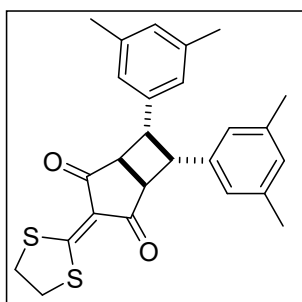

**3s** (57.3 mg, 44% yield) as yellow solid. mp: 241-243 °C.

<sup>1</sup>H NMR (500 MHz, CDCl<sub>3</sub>) δ 6.66 (s, 2H), 6.59 (s, 4H), 3.93 (d, *J* = 4.0 Hz, 2H), 3.61 (d, *J* = 3.5 Hz, 2H), 3.55 (s, 4H), 2.14 (s, 12H). <sup>13</sup>C NMR (151 MHz, CDCl<sub>3</sub>) δ 200.8, 183.3, 139.0, 136.9, 127.6, 126.0, 121.5, 48.0, 47.2, 37.5, 21.1. **HRMS** (ESI, *m/z*): Calculated for C<sub>26</sub>H<sub>26</sub>O<sub>2</sub>S<sub>2</sub> [M+Na]<sup>+</sup> 457.1266, found 457.1254.

**(1*R*,5*S*,7*S*)-3-(1,3-dithiolan-2-ylidene)-6,7-di(naphthalen-2-yl)bicyclo[3.2.0]heptane-2,4-dione (3t)**

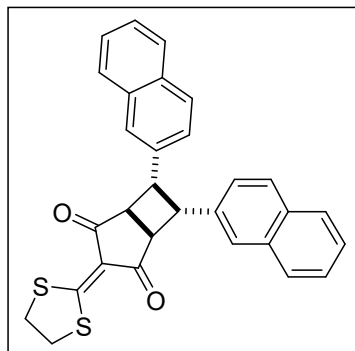

**3t** (43.0 mg, 30% yield) as yellow solid. mp: 157-159 °C.

**<sup>1</sup>H NMR** (600 MHz, CDCl<sub>3</sub>) δ 7.69 (d, *J* = 7.8 Hz, 2H), 7.66 (s, 2H), 7.61 (d, *J* = 8.4 Hz, 2H), 7.44 (d, *J* = 8.4 Hz, 2H), 7.38-7.36 (m, 2H), 7.35-7.32 (m, 2H), 7.00 (d, *J* = 1.8 Hz, 1H), 6.99 (d, *J* = 1.8 Hz, 1H), 4.31 (d, *J* = 3.6 Hz, 2H), 3.82 (d, *J* = 4.2 Hz, 2H), 3.59 (s, 4H). **<sup>13</sup>C NMR** (126 MHz, CDCl<sub>3</sub>) δ 200.5, 184.1, 136.9, 133.1, 131.9, 127.6, 127.6, 127.4, 126.5, 126.2, 125.8, 125.4, 121.4, 48.4, 47.4, 37.6. **HRMS** (ESI, *m/z*): Calculated for C<sub>30</sub>H<sub>22</sub>O<sub>2</sub>S<sub>2</sub> [M+Na]<sup>+</sup> 501.0953, found 501.0955.

**(1*R*,5*S*,6*R*,7*S*)-3-(1,3-dithiolan-2-ylidene)-6,7-di(furan-3-yl)bicyclo[3.1.1]heptane-2,4-dione (2u)**

**(1*r*,5*s*,6*R*,7*S*)-3-(1,3-dithiolan-2-ylidene)-6,7-di(furan-3-yl)bicyclo[3.1.1]heptane-2,4-dione (2u')**

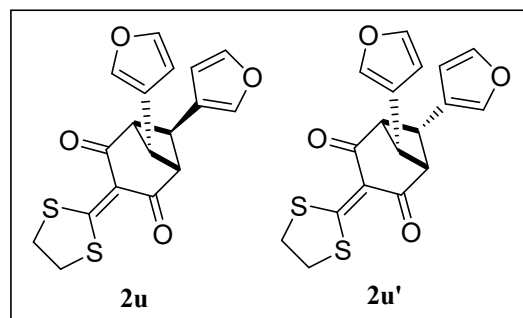

**2u/2u'** (46.2 mg, 43% yield) as yellow solid. mp 174-175 °C.

**2u**, **<sup>1</sup>H NMR** (600 MHz, CDCl<sub>3</sub>) δ 7.50 (s, 1H), 7.46 (s, 1H), 7.23 (s, 1H), 7.06 (s, 1H), 6.42 (s, 1H), 6.10 (s, 1H), 4.28 (t, *J* = 6.0 Hz, 1H), 3.60 (s, 1H), 3.51 (d, *J* = 6.0 Hz, 2H), 3.40 (s, 4H).

**2u'**, **<sup>1</sup>H NMR** (600 MHz, CDCl<sub>3</sub>) δ 7.24 (s, 2H), 7.08 (s, 2H), 6.15 (s, 2H), 3.94 (t, *J* = 6.0 Hz, 2H), 3.78 (t, *J* = 6.0 Hz, 2H), 3.30 (s, 4H).

**2u/2u'**, **<sup>13</sup>C NMR** (151 MHz, CDCl<sub>3</sub>) δ 194.9, 194.0, 182.1, 179.4, 143.7, 143.0, 143.0, 139.6, 139.2, 139.0, 123.2, 122.1, 121.5, 120.7, 119.2, 110.2, 109.6, 109.4, 56.0, 55.8

, 40.1, 40.0, 39.8, 37.6, 37.3. **HRMS** (ESI, m/z): Calculated for C<sub>18</sub>H<sub>14</sub>O<sub>4</sub>S<sub>2</sub> [M+Na]<sup>+</sup> 381.0226, found 381.0227.

**(1*R*,5*S*,7*S*)-3-(1,3-dithiolan-2-ylidene)-6,7-di(furan-3-yl)bicyclo[3.2.0]heptane-2,4-dione (3u)**

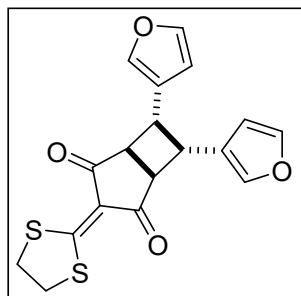

**3u** (44.0 mg, 41% yield) as yellow oil.

**<sup>1</sup>H NMR** (600 MHz, CDCl<sub>3</sub>) δ 7.25 (t, *J* = 1.8 Hz, 2H), 7.20 (s, 2H), 6.05-6.04 (m, 2H), 3.76 (d, *J* = 4.2 Hz, 2H), 3.57 (s, 4H), 3.36 (d, *J* = 4.2 Hz, 2H). **<sup>13</sup>C NMR** (151 MHz, CDCl<sub>3</sub>) δ 200.1, 184.1, 142.9, 139.6, 123.9, 121.0, 110.5, 48.5, 38.2, 37.6. **HRMS** (ESI, m/z): Calculated for C<sub>18</sub>H<sub>14</sub>O<sub>4</sub>S<sub>2</sub> [M+Na]<sup>+</sup> 381.0226, found 381.0226.

**(1*R*,5*S*,6*R*,7*S*)-3-(1,3-dithiolan-2-ylidene)-6,7-di(thiophen-3-yl)bicyclo[3.1.1]heptane-2,4-dione (2v)**

**(1*r*,5*s*,6*r*,7*s*)-3-(1,3-dithiolan-2-ylidene)-6,7-di(thiophen-3-yl)bicyclo[3.1.1]heptane-2,4-dione (2v')**

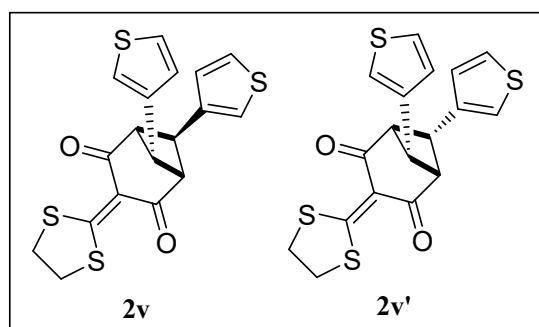

**2v/2v'** (49.1 mg, 42% yield) as yellow solid. mp: 177-178 °C, cannot be separated by column chromatography.

**2v**, **<sup>1</sup>H NMR** (600 MHz, CDCl<sub>3</sub>) δ 7.39-7.38 (m, 1H), 7.28 (t, *J* = 1.2 Hz, 1H), 7.14 (d, *J* = 3.0 Hz, 2H), 7.11 (d, *J* = 4.8 Hz, 1H), 6.76 (d, *J* = 4.8 Hz, 1H), 4.38 (t, *J* = 6.6 Hz, 1H), 3.76 (s, 1H), 3.74 (d, *J* = 6.0 Hz, 2H), 3.37-3.32 (m, 4H).

**2v'**, **<sup>1</sup>H NMR** (600 MHz, CDCl<sub>3</sub>) δ 7.16-7.15 (m, 2H), 6.87 (s, 2H), 6.82 (d, *J* = 4.2 Hz, 2H), 4.11 (t, *J* = 5.4 Hz, 2H), 3.98 (t, *J* = 5.4 Hz, 2H), 3.19 (s, 4H).

**2v/2v'**,  $^{13}\text{C}$  NMR (151 MHz,  $\text{CDCl}_3$ )  $\delta$  195.0, 194.1, 182.0, 179.3, 139.3, 139.1, 138.3, 127.2, 126.6, 126.3, 126.0, 125.9, 121.3, 120.9, 120.6, 120.5, 119.2, 56.4, 56.0, 43.7, 43.7, 43.4, 37.5, 37.2. **HRMS** (ESI,  $m/z$ ): Calculated for  $\text{C}_{18}\text{H}_{14}\text{O}_2\text{S}_4$   $[\text{M}+\text{Na}]^+$  412.9769, found 412.9789.

**(1*R*,5*S*,7*S*)-3-(1,3-dithiolan-2-ylidene)-6,7-di(thiophen-3-yl)bicyclo[3.2.0]heptane-2,4-dione (3v)**

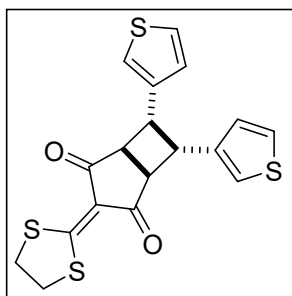

**3v** (56.2 mg, 48% yield) as yellow solid. mp: 111-112 °C.

$^1\text{H}$  NMR (600 MHz,  $\text{CDCl}_3$ )  $\delta$  7.07-7.06 (m, 2H), 6.88 (d,  $J = 1.2$  Hz, 2H), 6.60 (d,  $J = 5.4$  Hz, 2H), 4.00 (d,  $J = 3.0$  Hz, 2H), 3.55 (s, 4H), 3.54 (s, 2H).  $^{13}\text{C}$  NMR (151 MHz,  $\text{CDCl}_3$ )  $\delta$  200.2, 184.0, 140.4, 127.4, 125.2, 121.3, 121.3, 48.8, 42.9, 37.6. **HRMS** (ESI,  $m/z$ ): Calculated for  $\text{C}_{18}\text{H}_{14}\text{O}_2\text{S}_4$   $[\text{M}+\text{Na}]^+$  412.9769, found 412.9774.

**(1*R*,5*S*,6*R*,7*R*,*Z*)-3-(4-methyl-1,3-dithiol-2-ylidene)-6,7-diphenylbicyclo[3.1.1]heptane-2,4-dione (2w)**

**(1*r*,5*s*,6*R*,7*S*,*Z*)-3-(4-methyl-1,3-dithiol-2-ylidene)-6,7-diphenylbicyclo[3.1.1]heptane-2,4-dione (2w')**

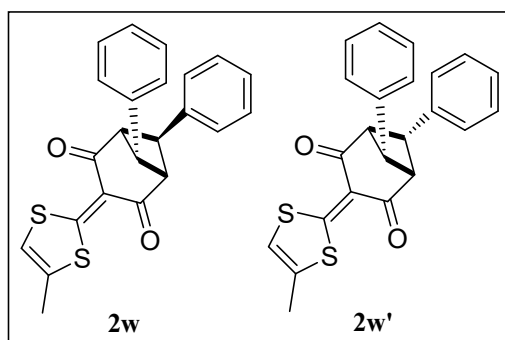

**2w/2w'** (43.3 mg, 37% yield) as brown oil, cannot be separated by column chromatography.

**2w**,  $^1\text{H}$  NMR (500 MHz,  $\text{CDCl}_3$ )  $\delta$  7.49 (d,  $J = 7.5$  Hz, 2H), 7.43 (t,  $J = 7.5$  Hz, 2H), 7.31 (t,  $J = 7.0$  Hz, 1H), 7.17 (t,  $J = 7.5$  Hz, 5H), 6.80 (s, 1H), 4.46 (t,  $J = 6.5$  Hz, 1H), 3.95-3.90 (m, 3H), 2.39 (s, 3H).



**2w**<sup>2</sup>, <sup>1</sup>H NMR (500 MHz, CDCl<sub>3</sub>) δ 7.13 (d, *J* = 7.5 Hz, 1H), 7.10 (d, *J* = 7.5 Hz, 4H), 7.07-7.04 (m, 3H), 7.01 (t, *J* = 8.0 Hz, 2H), 6.59 (s, 1H), 4.30 (t, *J* = 5.5 Hz, 2H), 4.17-4.15 (m, 2H), 2.24 (s, 3H).

**2w/2w**<sup>2</sup>, <sup>13</sup>C NMR (151 MHz, CDCl<sub>3</sub>) δ 194.5, 194.2, 193.0, 192.7, 174.1, 172.1, 139.1, 139.0, 138.8, 138.3, 138.3, 128.8, 128.3, 128.2, 127.0, 127.0, 126.2, 126.1, 126.1, 125.7, 120.0, 119.4, 115.1, 114.0, 55.0, 54.9, 54.5, 54.4, 48.8, 48.0, 48.0, 15.2, 15.0. **HRMS** (ESI, *m/z*): Calculated for C<sub>23</sub>H<sub>18</sub>O<sub>2</sub>S<sub>2</sub> [M+Na]<sup>+</sup> 413.0640, found 413.0636.

**(1*R*,5*S*,7*S*,*Z*)-3-(4-methyl-1,3-dithiol-2-ylidene)-6,7-diphenylbicyclo[3.2.0]heptane-2,4-dione (3w)**

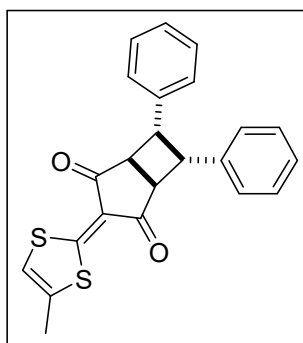

**3w** (29.2 mg, 25% yield) as yellow oil.

<sup>1</sup>H NMR (600 MHz, CDCl<sub>3</sub>) δ 7.11 (t, *J* = 7.8 Hz, 4H), 7.08 (d, *J* = 1.2 Hz, 1H), 7.03 (t, *J* = 7.2 Hz, 2H), 7.00-6.99 (m, 4H), 4.05 (d, *J* = 4.8 Hz, 2H), 3.69 (d, *J* = 3.0 Hz, 2H), 2.57 (d, *J* = 1.2 Hz, 3H). <sup>13</sup>C NMR (151 MHz, CDCl<sub>3</sub>) δ 199.9, 199.6, 175.0, 139.8, 139.5, 128.1, 127.8, 126.0, 120.2, 117.1, 48.2, 48.1, 47.1, 47.0, 15.6. **HRMS** (ESI, *m/z*): Calculated for C<sub>23</sub>H<sub>18</sub>O<sub>2</sub>S<sub>2</sub> [M+Na]<sup>+</sup> 413.0640, found 413.0649.

**(1*R*,5*S*,6*R*,7*S*)-3-(1,3-dithian-2-ylidene)-6,7-diphenylbicyclo[3.1.1]heptane-2,4-dione (2x)**

**(1*r*,5*s*,6*R*,7*S*)-3-(1,3-dithian-2-ylidene)-6,7-diphenylbicyclo[3.1.1]heptane-2,4-dione (2x')**

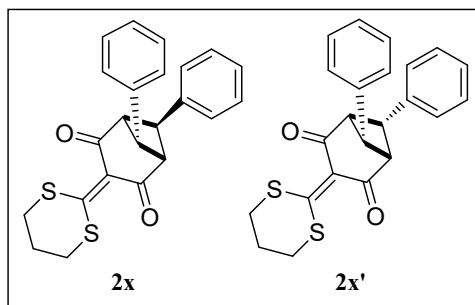

**2x/2x**<sup>2</sup> (42.3 mg, 36% yield) as yellow oil, cannot be separated by column chromatography.

**2x**, <sup>1</sup>H NMR (500 MHz, CDCl<sub>3</sub>) δ 7.46 (d, *J* = 7.0 Hz, 2H), 7.42 (t, *J* = 7.5 Hz, 2H), 7.31 (t, *J* = 7.5 Hz, 1H), 7.23 (d, *J* = 7.5 Hz, 2H), 7.14 (d, *J* = 7.0 Hz, 1H), 7.01 (d, *J* = 8.0 Hz, 2H), 4.34 (t, *J* = 6.0 Hz, 1H), 3.86 (d, *J* = 6.0 Hz, 2H), 3.81 (s, 1H), 2.88-2.83 (m, 2H), 2.81-2.75 (m, 2H), 2.26-2.19 (m, 2H).

**2x'**, <sup>1</sup>H NMR (500 MHz, CDCl<sub>3</sub>) δ 7.20 (t, *J* = 7.5 Hz, 5H), 7.10 (d, *J* = 7.5 Hz, 5H), 4.18 (t, *J* = 6.0 Hz, 2H), 4.10 (t, *J* = 5.5 Hz, 2H), 2.57 (t, *J* = 7.0 Hz, 4H), 2.08-2.02 (m, 2H).

**2x/2x'**, <sup>13</sup>C NMR (151 MHz, CDCl<sub>3</sub>) δ 195.4, 194.3, 186.1, 183.2, 138.8, 138.3, 138.0, 128.8, 128.4, 128.3, 127.0, 127.0, 126.3, 126.3, 126.2, 125.9, 124.9, 56.2, 55.9, 46.3, 46.0, 45.9, 30.5, 30.2, 23.4, 23.3. **HRMS** (ESI, *m/z*): Calculated for C<sub>23</sub>H<sub>20</sub>O<sub>2</sub>S<sub>2</sub> [M+Na]<sup>+</sup> 415.0797, found 415.0786.

**(1*R*,5*S*,6*R*,7*S*)-3-(1,3-dithiepan-2-ylidene)-6,7-diphenylbicyclo[3.1.1]heptane-2,4-dione (2y)**

**(1*r*,5*s*,6*R*,7*S*)-3-(1,3-dithiepan-2-ylidene)-6,7-diphenylbicyclo[3.1.1]heptane-2,4-dione (2y')**

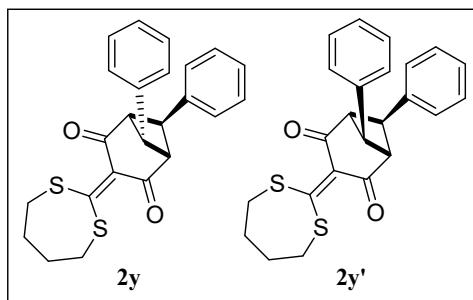

**2y/2y'** (52.4 mg, 43% yield) as yellow oil, cannot be separated by column chromatography.

**2y**, <sup>1</sup>H NMR (500 MHz, CDCl<sub>3</sub>) δ 7.46 (d, *J* = 7.5 Hz, 2H), 7.42 (t, *J* = 7.0 Hz, 2H), 7.31 (t, *J* = 7.5 Hz, 1H), 7.23-7.20 (m, 2H), 7.14-7.12 (m, 1H), 7.00 (d, *J* = 8.0 Hz, 2H), 4.32 (t, *J* = 6.5 Hz, 1H), 3.89 (d, *J* = 6.0 Hz, 2H), 3.79 (s, 1H), 3.08-3.03 (m, 2H), 2.97-2.92 (m, 2H), 2.02-1.93 (m, 4H).

**2y'**, <sup>1</sup>H NMR (500 MHz, CDCl<sub>3</sub>) δ 7.19 (d, *J* = 8.0 Hz, 5H), 7.10 (d, *J* = 7.5 Hz, 5H), 4.18-4.13 (m, 4H), 2.73 (s, 4H), 1.82 (s, 4H).

**2y/2y'**, <sup>13</sup>C NMR (151 MHz, CDCl<sub>3</sub>) δ 195.4, 194.5, 185.1, 138.8, 138.2, 137.9, 128.8, 128.4, 128.3, 127.8, 127.1, 127.0, 127.0, 126.8, 126.4, 126.3, 126.2, 125.9, 56.6, 56.4, 45.8, 45.6, 45.5, 38.6, 38.0, 28.4, 28.3. **HRMS** (ESI, *m/z*): Calculated for C<sub>24</sub>H<sub>22</sub>O<sub>2</sub>S<sub>2</sub> [M+Na]<sup>+</sup> 429.0953, found 429.0959.

**(1*S*,5*S*,6*S*,7*S*)-3-(1,3-dithiolan-2-ylidene)-6-phenyl-7-(*p*-tolyl)bicyclo[3.1.1]heptane-2,4-dione (2aa)**

**(1*R*,5*R*,6*R*,7*R*)-3-(1,3-dithiolan-2-ylidene)-6-phenyl-7-(*p*-tolyl)bicyclo[3.1.1]heptane-2,4-dione (2ab)**

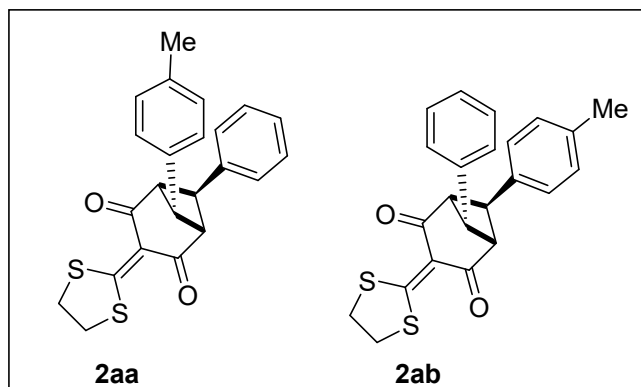

**2aa/2ab/2aa'/2ab'** (41.2 mg, 35% yield) as yellow oil, cannot be separated by column chromatography.

**2aa/2ab**, <sup>1</sup>H NMR (500 MHz, CDCl<sub>3</sub>) δ 7.43-7.36 (m, 4H), 7.14-7.10 (m, 4H), 7.05-7.03 (m, 4H), 6.91-6.88 (m, 4H), 6.81-6.79 (m, 2H), 4.33 (t, *J* = 6.0 Hz, 1H), 4.29 (t, *J* = 6.0 Hz, 1H), 3.84 (dd, *J* = 14.0 Hz, 6.0 Hz, 2H), 3.81 (dd, *J* = 14.0 Hz, 6.0 Hz, 2H), 3.75 (d, *J* = 7.5 Hz, 1H), 3.72 (d, *J* = 7.5 Hz, 1H), 3.33-3.23 (m, 8H), 2.31 (d, *J* = 7.5 Hz, 3H), 2.26 (d, *J* = 6.0 Hz, 3H).

**(1*S*,5*S*,6*R*,7*R*)-3-(1,3-dithiolan-2-ylidene)-6-phenyl-7-(*p*-tolyl)bicyclo[3.1.1]heptane-2,4-dione (2aa')**

**(1*R*,5*R*,6*S*,7*S*)-3-(1,3-dithiolan-2-ylidene)-6-phenyl-7-(*p*-tolyl)bicyclo[3.1.1]heptane-2,4-dione (2ab')**

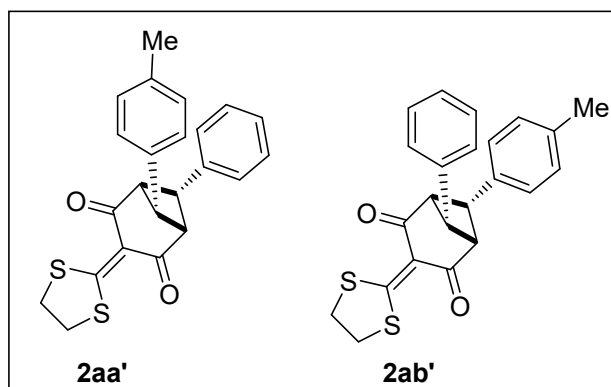

**2aa/2ab/2aa'/2ab'** (41.2 mg, 35% yield) as yellow oil, cannot be separated by column chromatography.

**2aa'/2ab'**, <sup>1</sup>H NMR (500 MHz, CDCl<sub>3</sub>) δ 7.36-7.34 (m, 2H), 7.29-7.25 (m, 2H), 7.17-7.

14 (m, 4H), 7.03-7.00 (m, 4H), 6.95-6.93 (m, 6H), 4.17-4.05 (m, 8H), 3.05-3.03 (m, 8 H), 2.17 (s, 6H), 2.16 (d,  $J = 6.0$  Hz, 6H).

**2aa/2ab/2aa'/2ab'**,  $^{13}\text{C}$  NMR (151 MHz,  $\text{CDCl}_3$ )  $\delta$  195.5, 195.4, 195.3, 195.2, 194.3, 194.2, 194.2, 194.0, 182.1, 181.9, 181.8, 181.6, 179.6, 179.3, 179.3, 179.1, 144.0, 143.9, 143.7, 143.6, 138.8, 138.7, 138.4, 138.3, 138.0, 137.9, 136.8, 136.7, 135.9, 135.9, 135.8, 135.7, 135.6, 135.5, 135.3, 135.2, 134.8, 134.7, 129.8, 129.6, 129.5, 129.1, 129.1, 128.9, 128.9, 128.5, 128.4, 128.4, 127.1, 127.0, 126.4, 126.4, 126.3, 126.3, 126.1, 126.1, 126.0, 126.0, 125.8, 125.6, 120.6, 120.5, 120.4, 119.4, 119.3, 119.3, 119.3, 55.5, 55.5, 55.1, 55.1, 46.6, 46.6, 46.4, 46.3, 46.1, 46.1, 46.0, 45.9, 45.9, 45.8, 37.5, 37.1, 21.0, 21.0. **HRMS** (ESI,  $m/z$ ): Calculated for  $\text{C}_{23}\text{H}_{20}\text{NaO}_2\text{S}_2$   $[\text{M}+\text{Na}]^+$  415.0797, found 415.0791.

**(1R,5S,7S)-3-(1,3-dithiolan-2-ylidene)-6-phenyl-7-(*p*-tolyl)bicyclo[3.2.0]heptane-2,4-dione (3aa)**

**(1R,5S,7R)-3-(1,3-dithiolan-2-ylidene)-6-phenyl-7-(*p*-tolyl)bicyclo[3.2.0]heptane-2,4-dione (3ab)**

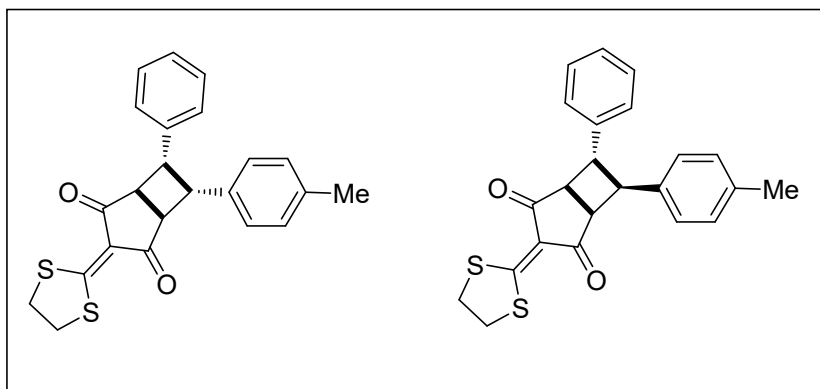

**3aa/3ab** (49.5 mg, 42% yield) as yellow oil, cannot be separated by column chromatography.

$^1\text{H}$  NMR (500 MHz,  $\text{CDCl}_3$ )  $\delta$  7.11 (dd,  $J = 16$  Hz, 6 Hz, 6H), 7.04 (d,  $J = 6.5$  Hz, 2H), 6.99 (t,  $J = 7.0$  Hz, 4H), 6.91 (t,  $J = 7.5$  Hz, 3H), 6.88-6.85 (m, 3H), 4.06-3.98 (m, 4H), 3.65-3.58 (m, 4H), 3.54-3.53 (m, 8H), 2.21 (s, 3H), 2.20 (s, 3H).  $^{13}\text{C}$  NMR (151 MHz,  $\text{CDCl}_3$ )  $\delta$  200.8, 200.7, 200.7, 200.6, 184.0, 183.8, 183.6, 139.3, 139.1, 136.3, 136.1, 135.6, 135.5, 129.3, 129.2, 129.2, 129.1, 128.6, 128.5, 128.0, 127.9, 127.8, 127.7, 127.6, 126.1, 126.1, 121.3, 121.3, 121.3, 48.4, 48.3, 48.1, 48.0, 47.2, 47.2, 46.9, 46.9, 37.6, 37.6, 37.5, 22.6, 20.9, 20.9. **HRMS** (ESI,  $m/z$ ): Calculated for  $\text{C}_{23}\text{H}_{20}\text{NaO}_2\text{S}_2$   $[\text{M}+\text{Na}]^+$  415.0797, found 415.0805.

**(1S,5S,6S,7S)-3-(1,3-dithiolan-2-ylidene)-6-(4-methoxyphenyl)-7phenylbicyclo**

**[3.1.1]heptane-2,4-dione (2ac)**

**(1*R*,5*R*,6*R*,7*R*)-3-(1,3-dithiolan-2-ylidene)-6-(4-methoxyphenyl)-7-phenylbicyclo**

**[3.1.1]heptane-2,4-dione (2ad)**

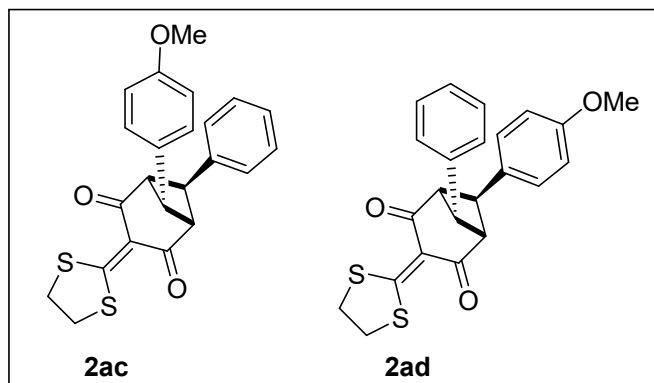

**2ac/2ad/2ac'/2ad'** (46.6 mg, 38% yield) as yellow oil, cannot be separated by column chromatography.

**2ac/2ad**, <sup>1</sup>H NMR (500 MHz, CDCl<sub>3</sub>) δ 7.46-7.40 (m, 4H), 7.30 (t, *J* = 7.5 Hz, 2H), 7.16 (d, *J* = 8.0 Hz, 2H), 7.11 (d, *J* = 7.0 Hz, 2H), 6.99 (d, *J* = 9.0 Hz, 4H), 6.73 (d, *J* = 9.0 Hz, 4H), 4.38 (t, *J* = 6.0 Hz, 1H), 4.33 (t, *J* = 6.0 Hz, 1H), 3.86 (t, *J* = 5.5 Hz, 2H), 3.70 (s, 3H), 3.33-3.30 (m, 4H).

**(1*S*,5*S*,6*R*,7*R*)-3-(1,3-dithiolan-2-ylidene)-6-(4-methoxyphenyl)-7-phenylbicyclo**  
**[3.1.1]heptane-2,4-dione (2ac')**

**(1*R*,5*R*,6*S*,7*S*)-3-(1,3-dithiolan-2-ylidene)-6-(4-methoxyphenyl)-7-phenylbicyclo**  
**[3.1.1]heptane-2,4-dione (2ad')**

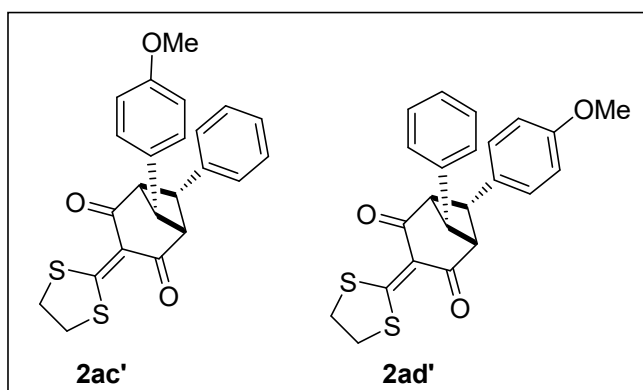

**2ac/2ad/2ac'/2ad'** (46.6 mg, 38% yield) as yellow oil, cannot be separated by column chromatography.

**2ac'/2ad'**, <sup>1</sup>H NMR (500 MHz, CDCl<sub>3</sub>) δ 7.37 (t, *J* = 9.0 Hz, 2H), 7.21-7.18 (m, 4H), 7.07 (d, *J* = 8.0 Hz, 4H), 6.98 (d, *J* = 6.0 Hz, 2H), 6.95 (d, *J* = 8.5 Hz, 2H), 6.90 (d, *J* = 8.5 Hz, 2H), 6.71 (d, *J* = 8.5 Hz, 2H), 4.18 (dd, *J* = 12.5 Hz, 6.0 Hz, 4H), 4.12 (t, *J* = 6.0 Hz, 4H), 3.71 (s, 3H), 3.13-3.08 (m, 4H).

**2ac/2ad/2ac'/2ad'**, <sup>13</sup>C NMR (151 MHz, CDCl<sub>3</sub>) δ 195.4, 195.3, 194.2, 181.9, 181.9,

179.4, 158.6, 158.0, 157.9, 138.8, 138.4, 138.0, 130.7, 130.2, 130.0, 128.8, 128.4, 128.1, 127.3, 127.1, 127.0, 126.9, 126.4, 126.3, 126.1, 125.7, 120.5, 119.3, 114.3, 113.9, 58.4, 55.6, 55.4, 55.3, 55.1, 55.1, 46.5, 46.1, 46.0, 46.0, 45.6, 45.5, 37.5, 37.1.0. **HRMS** (ESI, m/z): Calculated for  $C_{23}H_{20}NaO_3S_2$   $[M+Na]^+$  431.0746, found 431.0738.

**(1*S*,5*R*,6*S*)-3-(1,3-dithiolan-2-ylidene)-6-(4-methoxyphenyl)-7-phenylbicyclo[3.2.0]heptane-2,4-dione (3ac)**

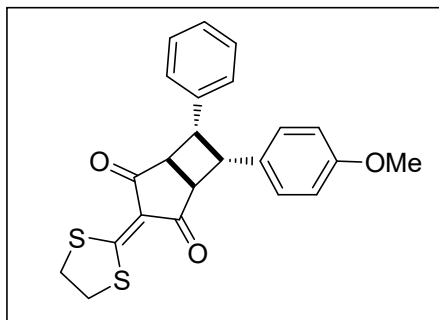

**3ac/3ad** (57.6 mg, 47% yield) as yellow oil, cannot be separated by column chromatography.

**3ac**,  $^1H$  NMR (500 MHz,  $CDCl_3$ )  $\delta$  7.11 (d,  $J = 7.5$  Hz, 2H), 7.04 (t,  $J = 7.5$  Hz, 1H), 6.98(d,  $J = 7.5$  Hz, 2H), 6.88 (t,  $J = 8.5$  Hz, 2H), 6.64 (d,  $J = 8.5$  Hz, 2H), 4.04-3.98 (m, 1H), 3.77 (d,  $J = 8.5$  Hz, 1H), 3.69 (s, 3H), 3.65-3.63 (m, 1H), 3.59-3.56 (m, 1H), 3.55(s, 4H).  $^{13}C$  NMR (151 MHz,  $CDCl_3$ )  $\delta$ 200.7, 200.6, 183.7, 157.9, 139.2, 131.3, 129.0, 128.0, 127.9, 126.1, 113.3, 55.1, 48.5, 47.9, 47.3, 46.7, 37.6. **HRMS** (ESI, m/z): Calculated for  $C_{23}H_{20}NaO_3S_2$   $[M+Na]^+$  431.0746, found 431.0754.

## 8. Copies of $^1\text{H}$ NMR and $^{13}\text{C}$ NMR spectra

$^1\text{H}$  spectrum (600 MHz,  $\text{CDCl}_3$ ) of compound 2a/2a'

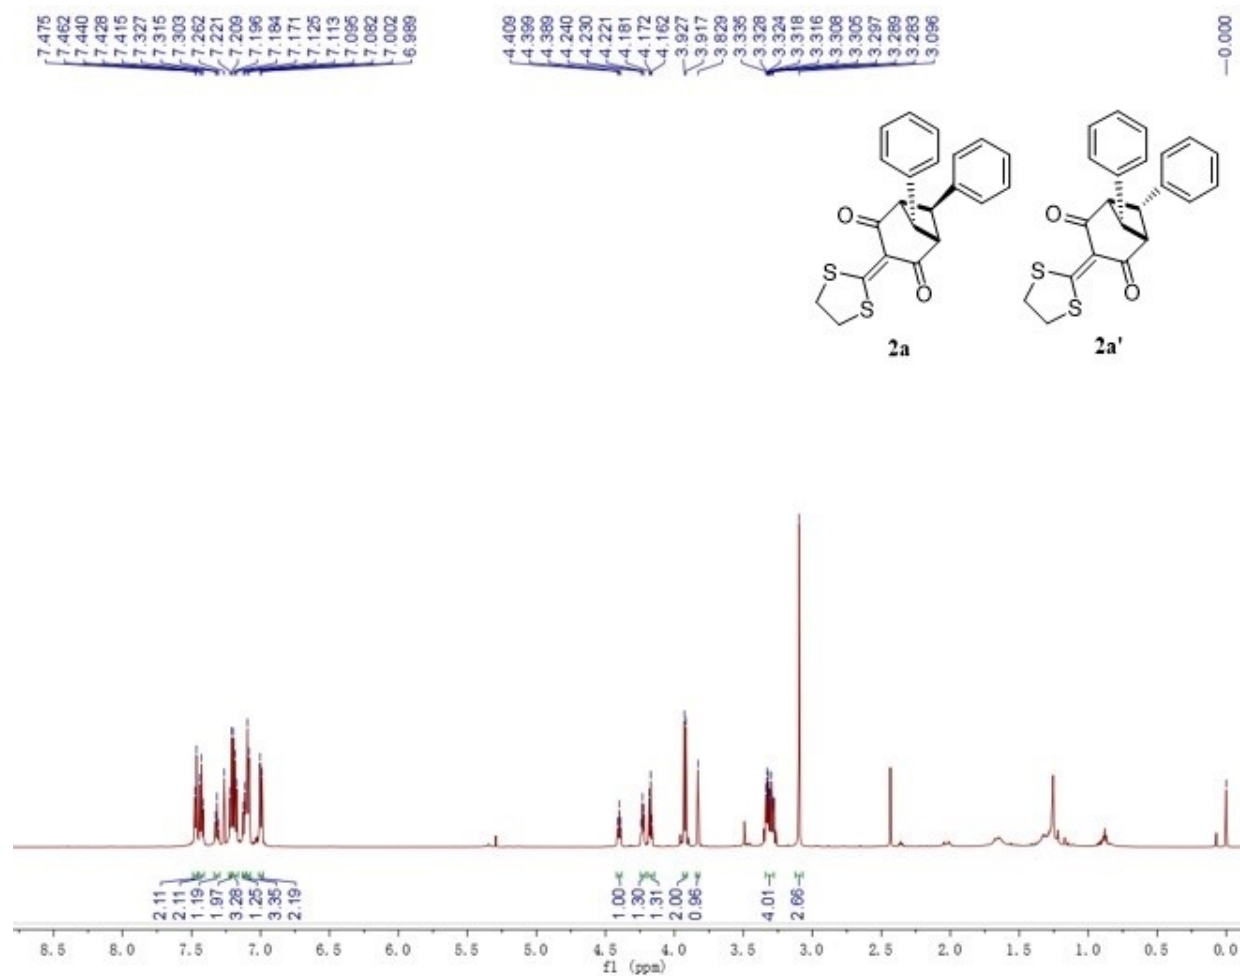

**$^{13}\text{C}$  spectrum (151 MHz,  $\text{CDCl}_3$ ) of compound 2a/2a'**

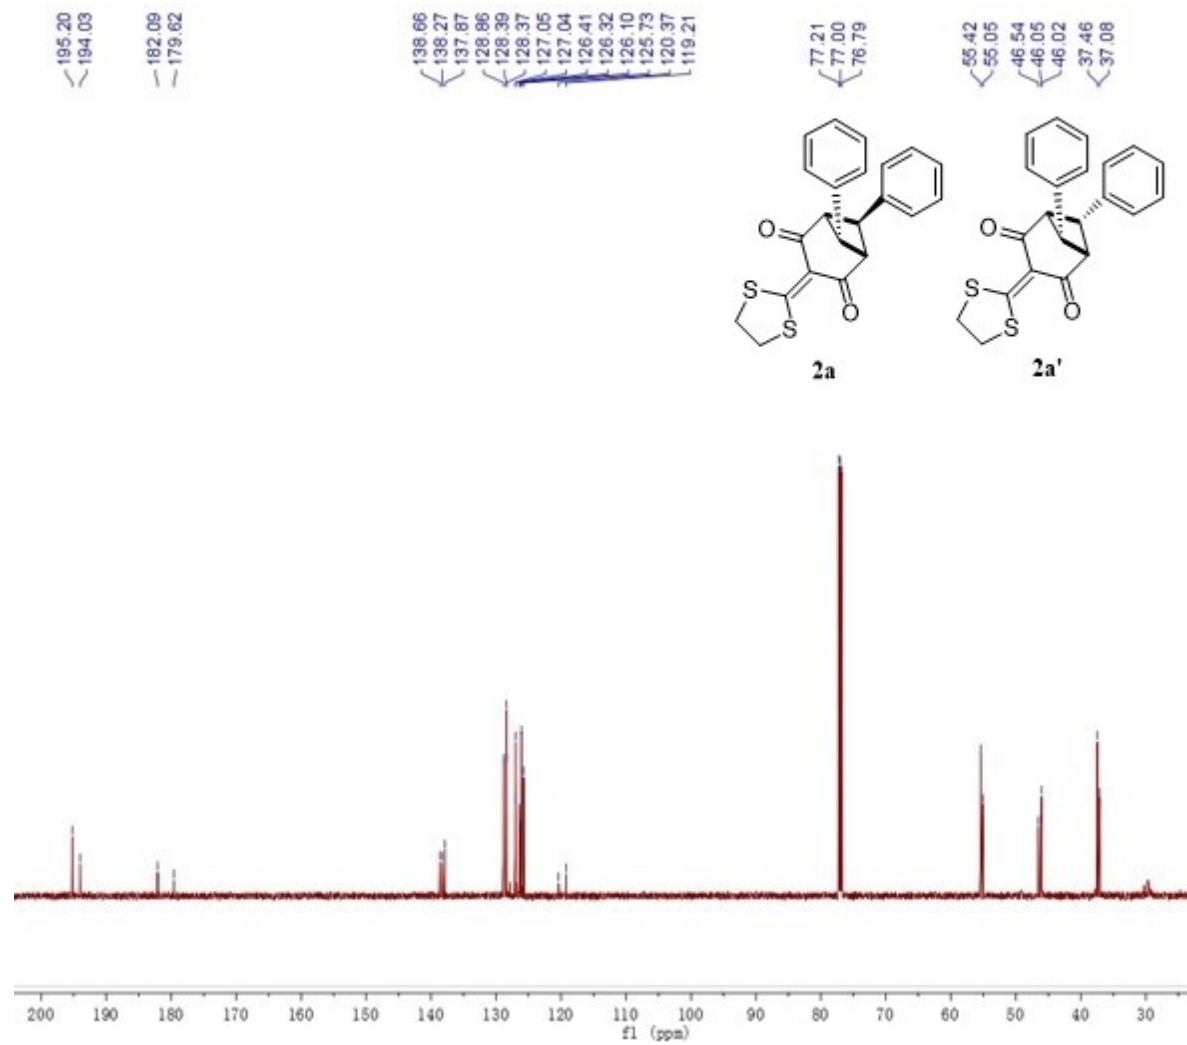



<sup>1</sup>H spectrum (600 MHz, CDCl<sub>3</sub>) of compound 3a

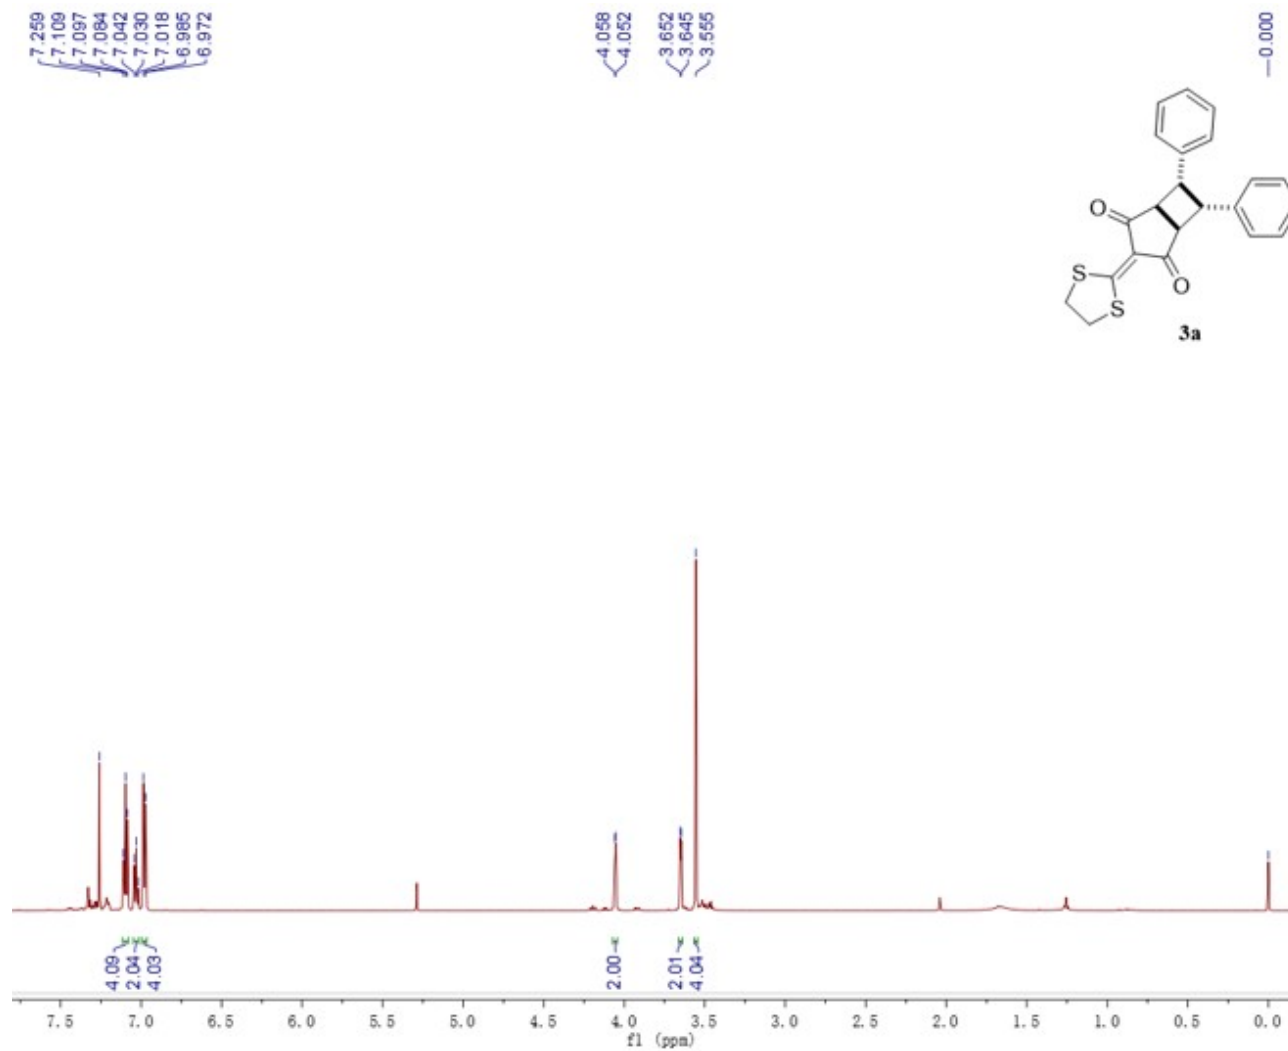

$^{13}\text{C}$  spectrum (151 MHz,  $\text{CDCl}_3$ ) of compound 3a

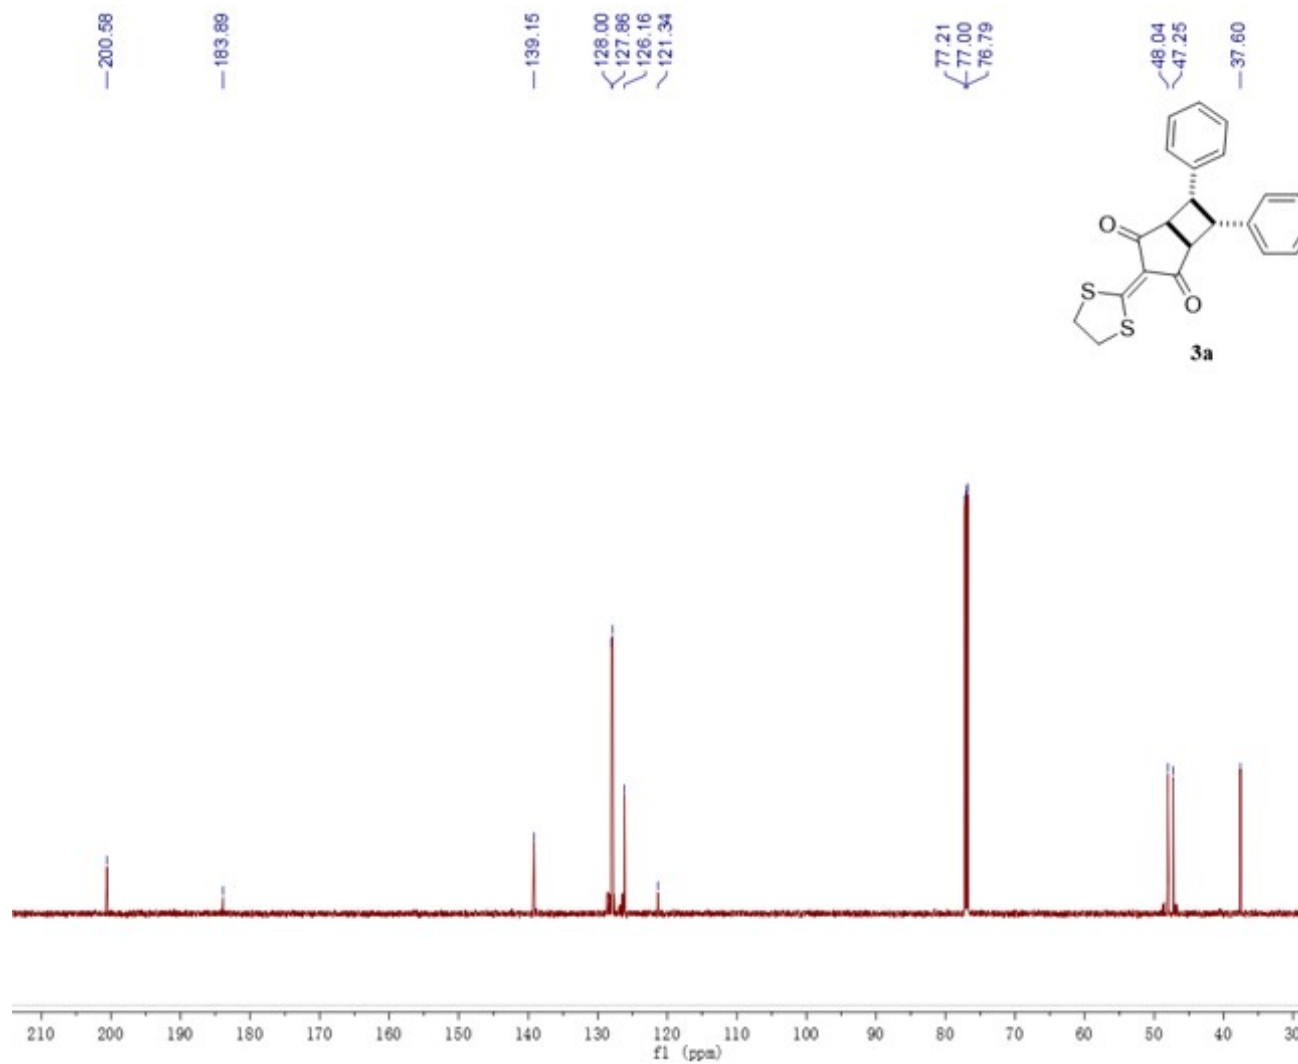

**<sup>1</sup>H spectrum (600 MHz, CDCl<sub>3</sub>) of compound 2b/2b'**

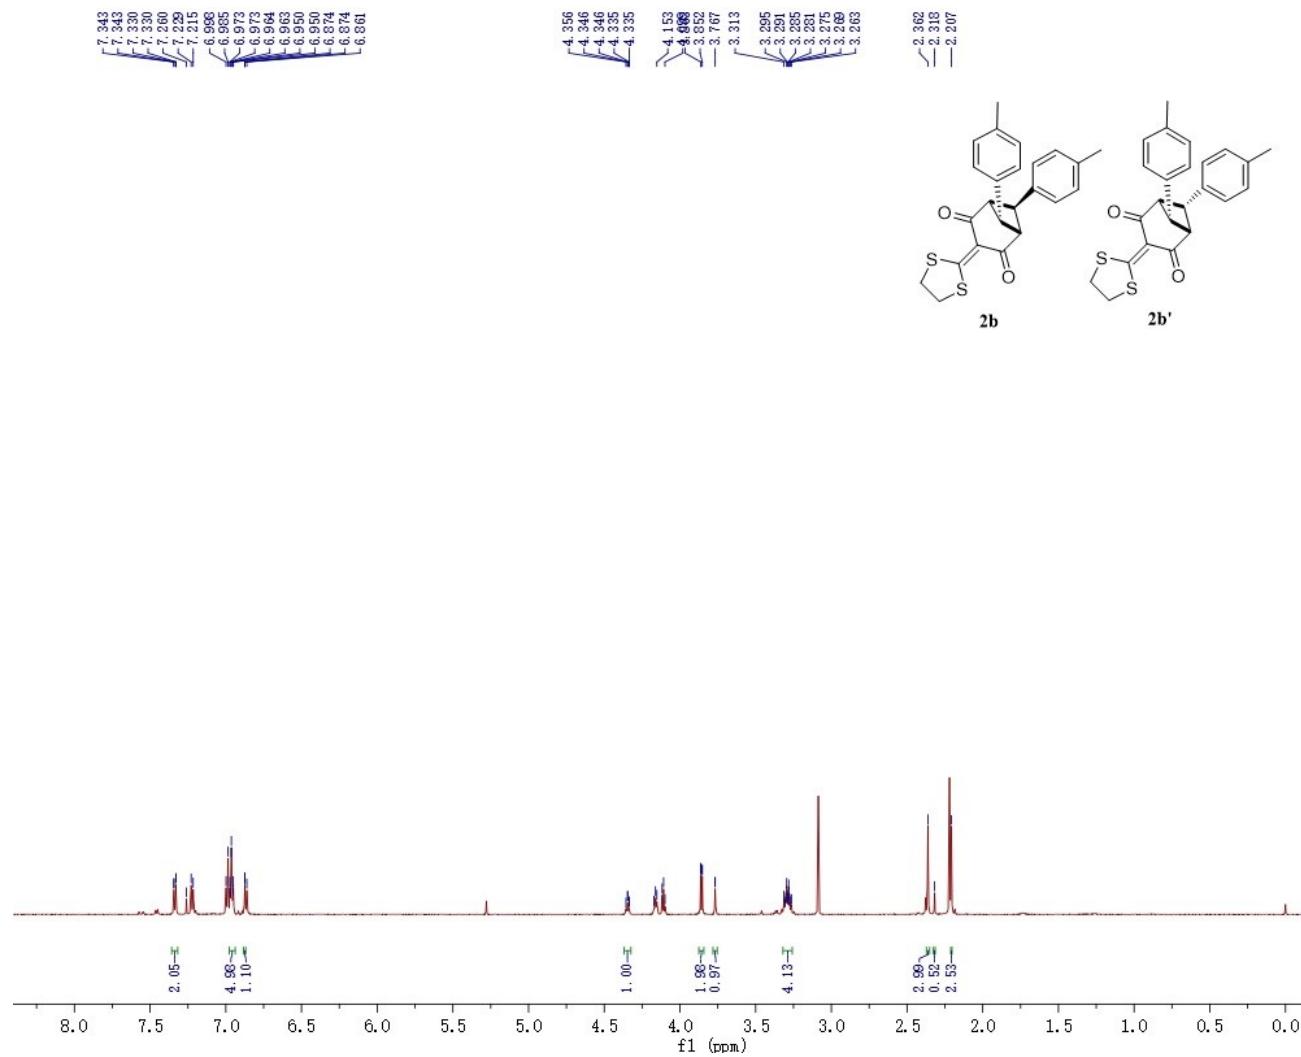

**$^{13}\text{C}$  spectrum (151 MHz,  $\text{CDCl}_3$ ) of compound 2b/2b'**

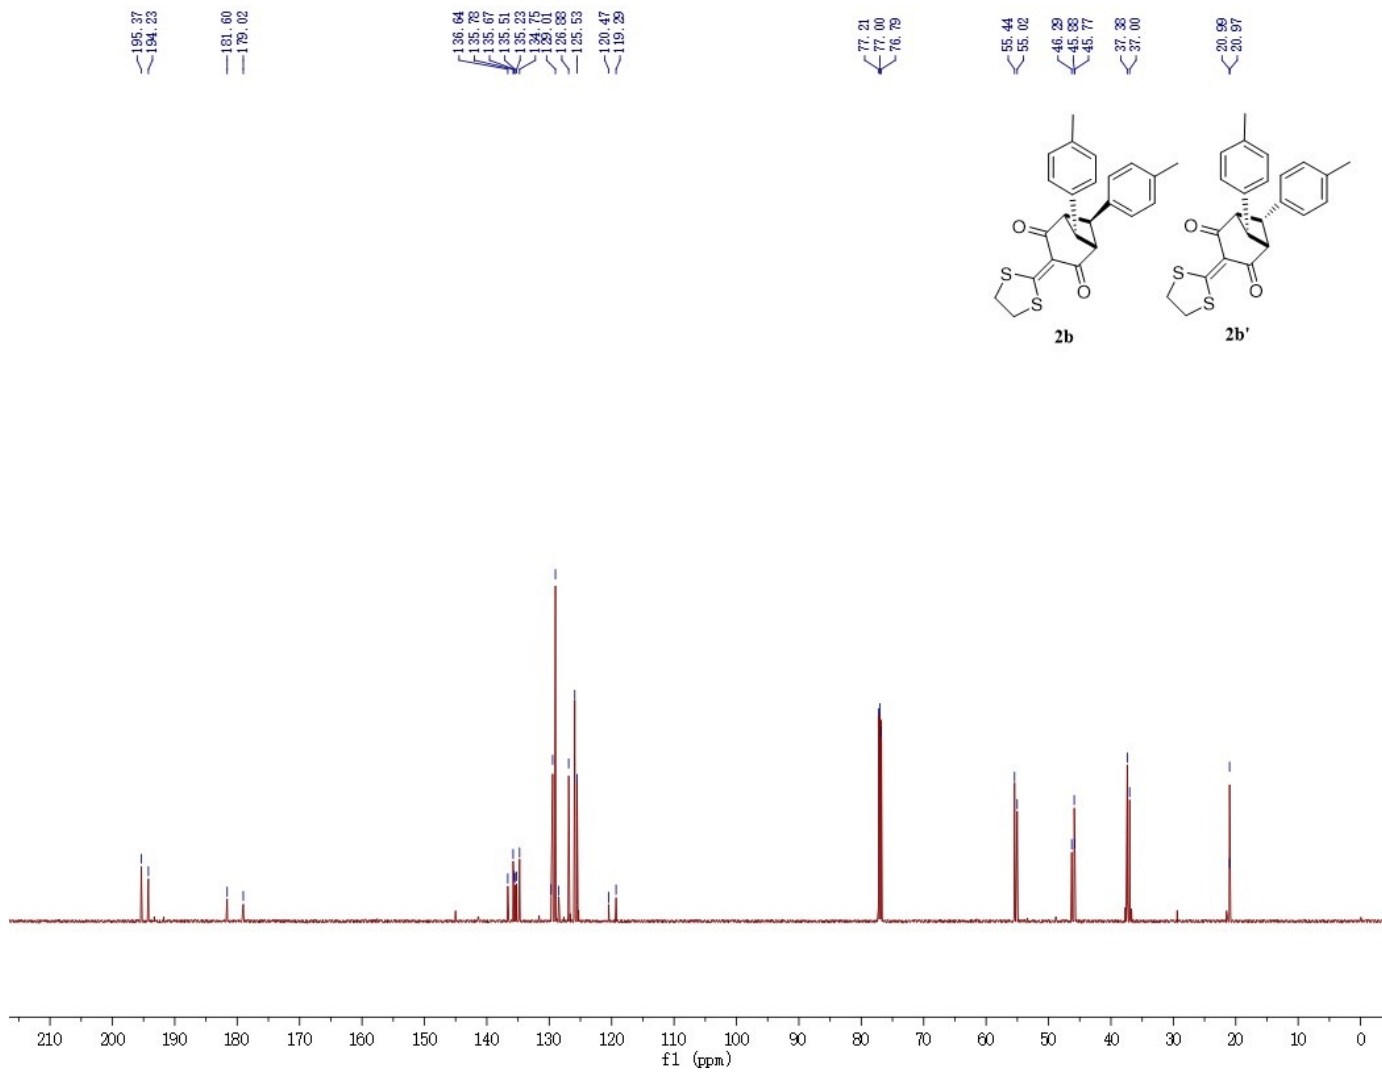

**<sup>1</sup>H spectrum (500 MHz, CDCl<sub>3</sub>) of compound 3b**

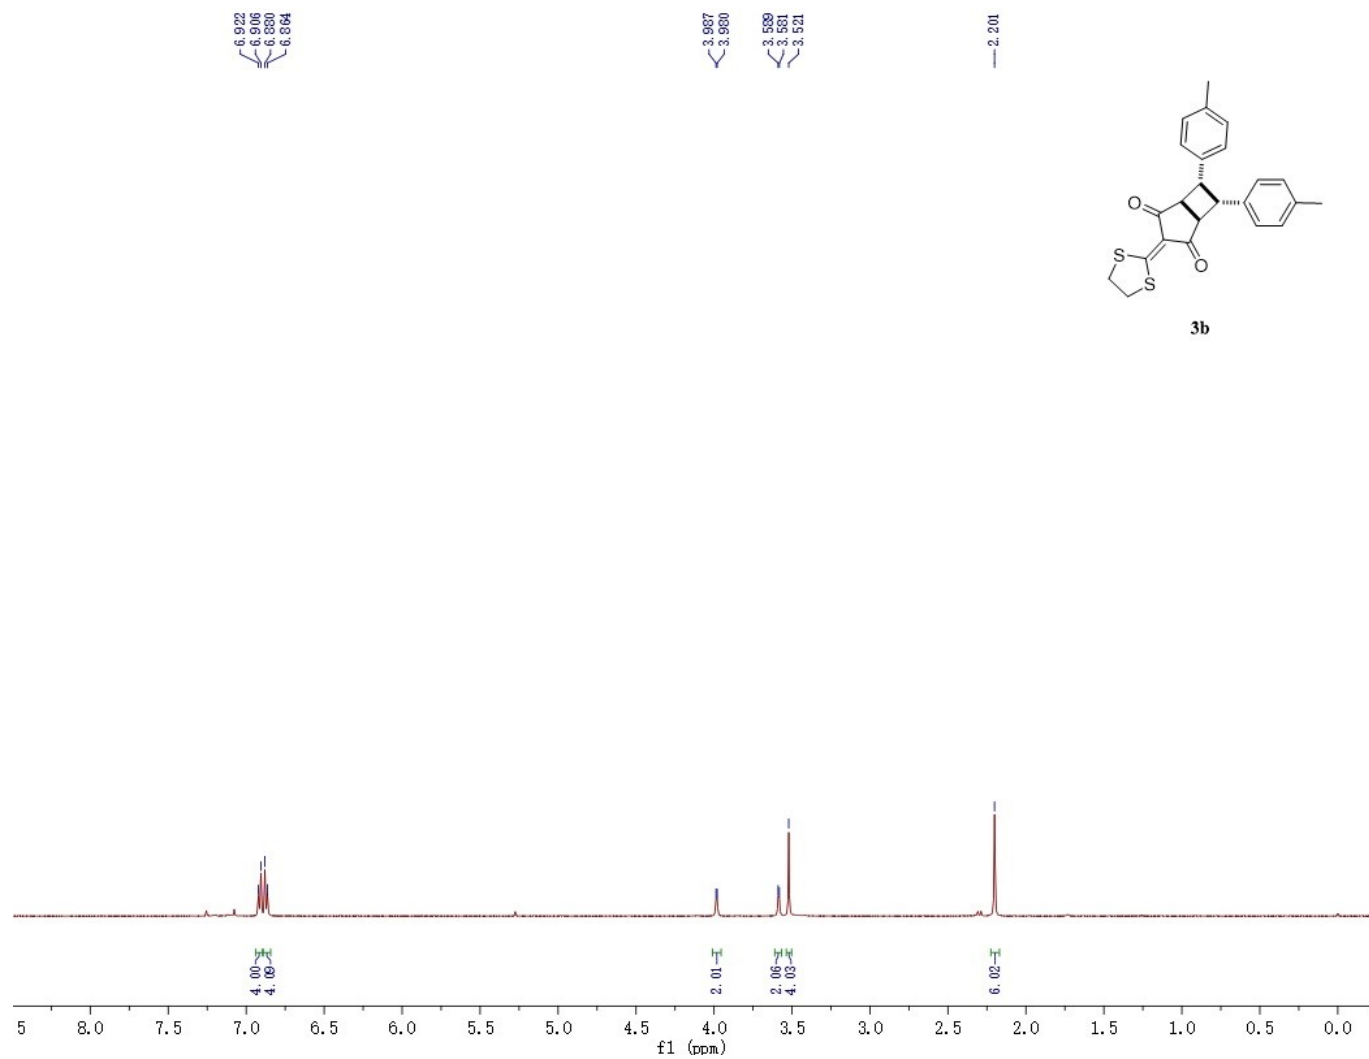

**<sup>13</sup>C spectrum (151 MHz, CDCl<sub>3</sub>) of compound 3b**

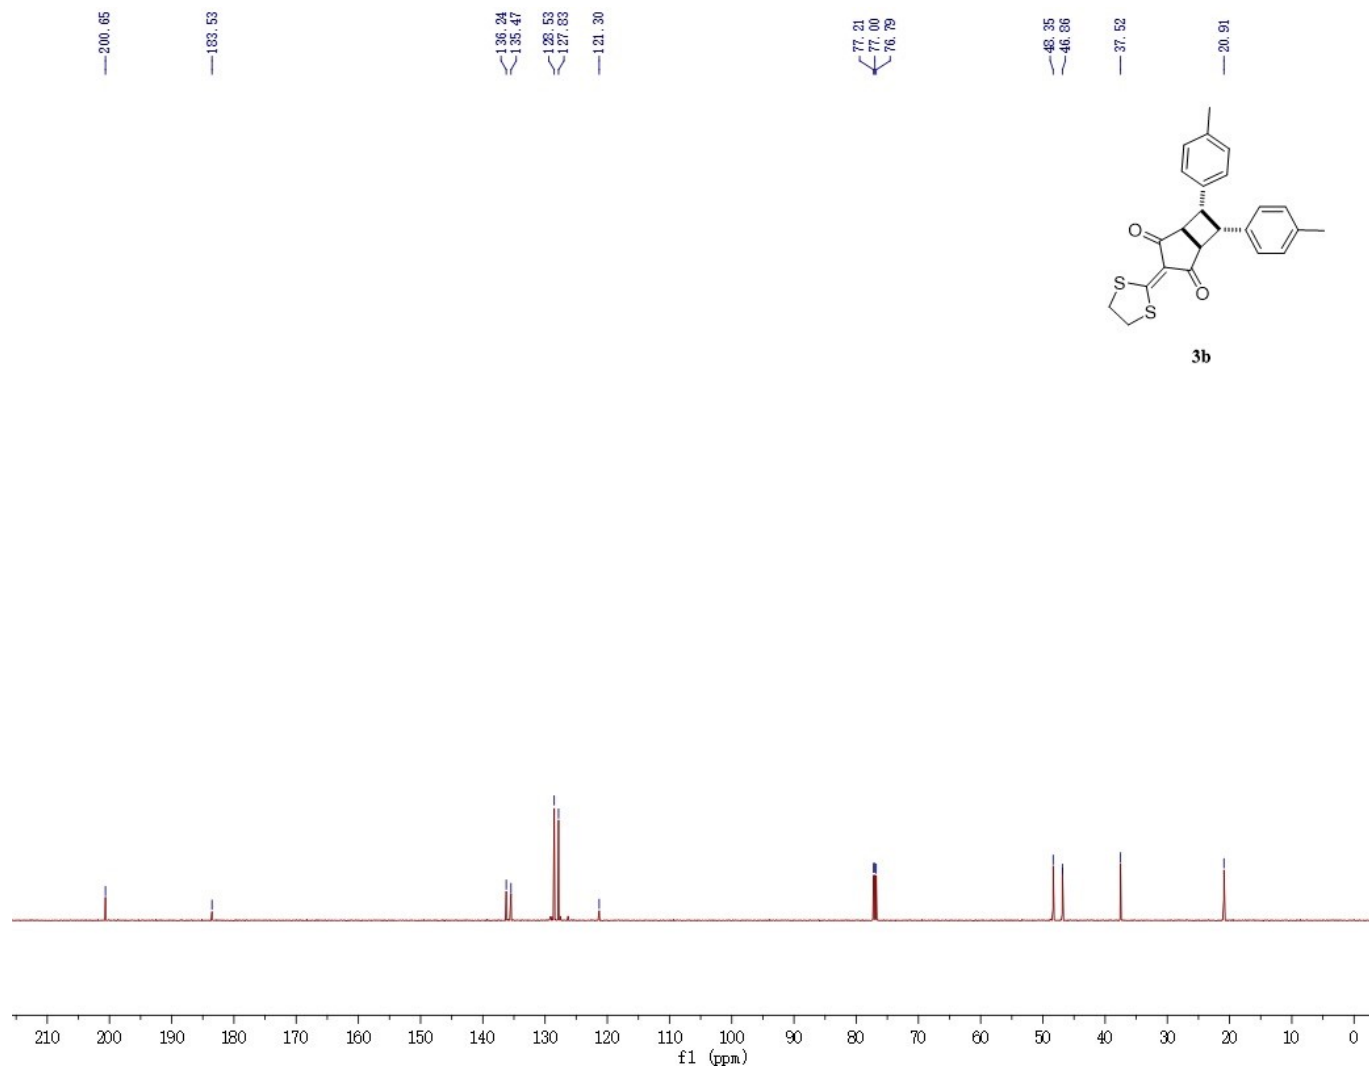

<sup>1</sup>H spectrum (600 MHz, CDCl<sub>3</sub>) of compound 2c/2c'

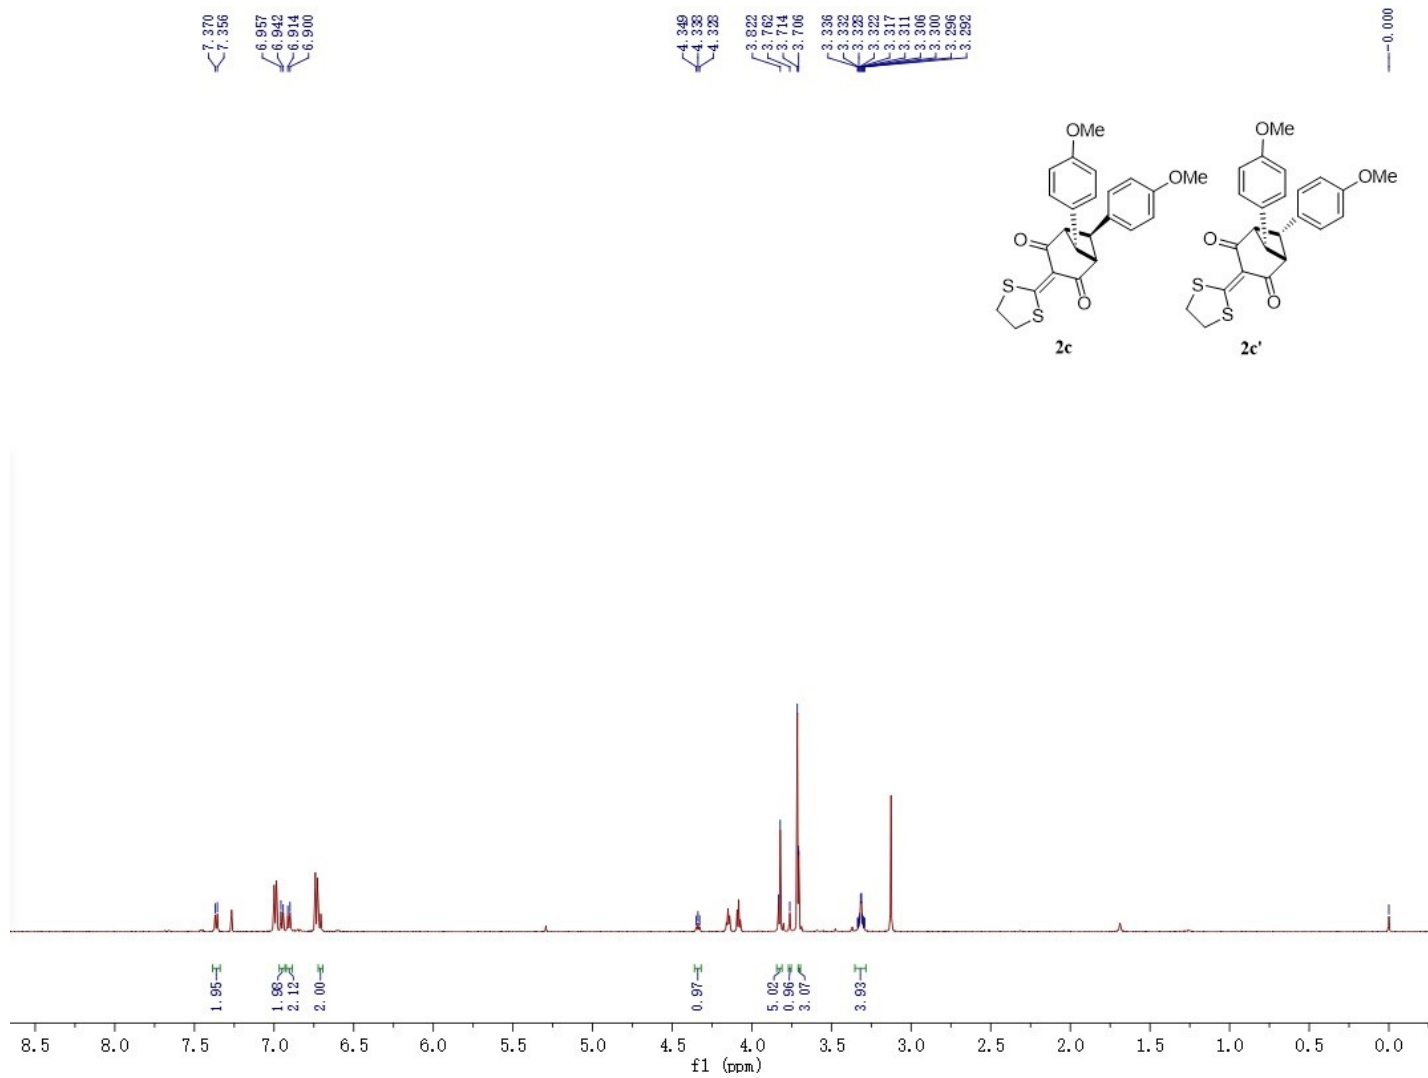

**<sup>13</sup>C spectrum (151 MHz, CDCl<sub>3</sub>) of compound 2c/2c'**

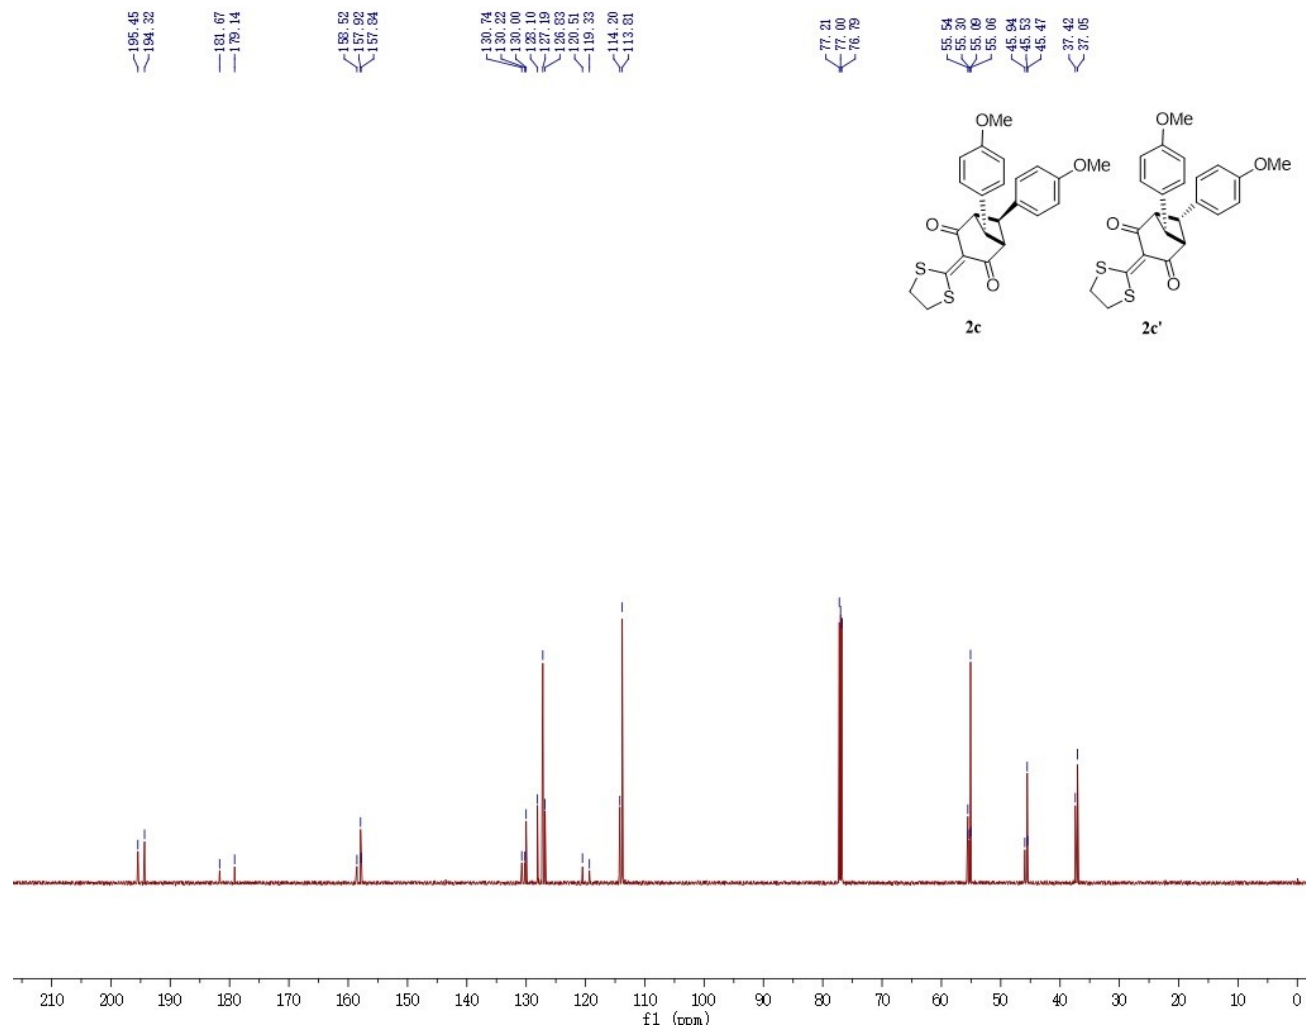



**<sup>1</sup>H spectrum (500 MHz, CDCl<sub>3</sub>) of compound 3c**

6.894  
6.878  
6.863  
6.646

3.964  
3.957  
3.705  
3.553

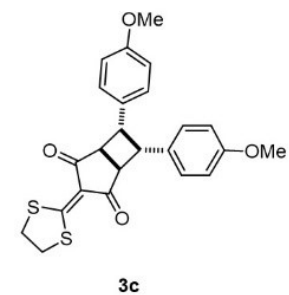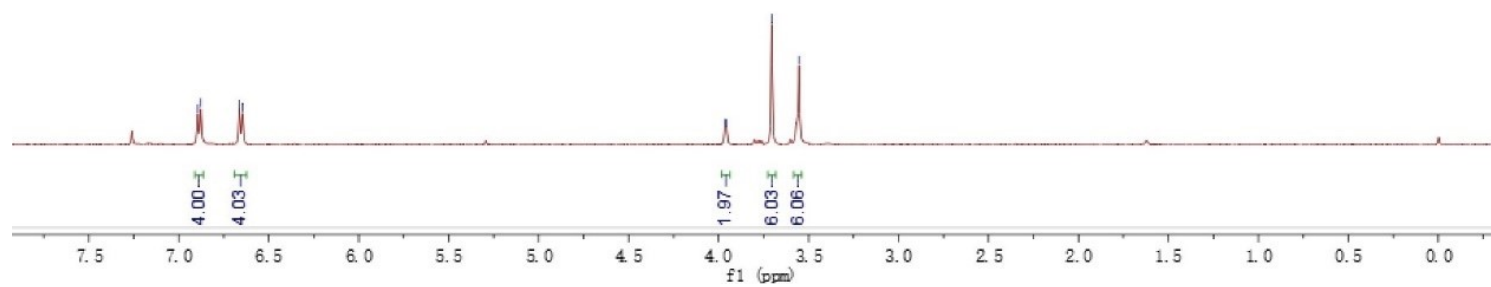

<sup>13</sup>C spectrum (151 MHz, CDCl<sub>3</sub>) of compound 3c

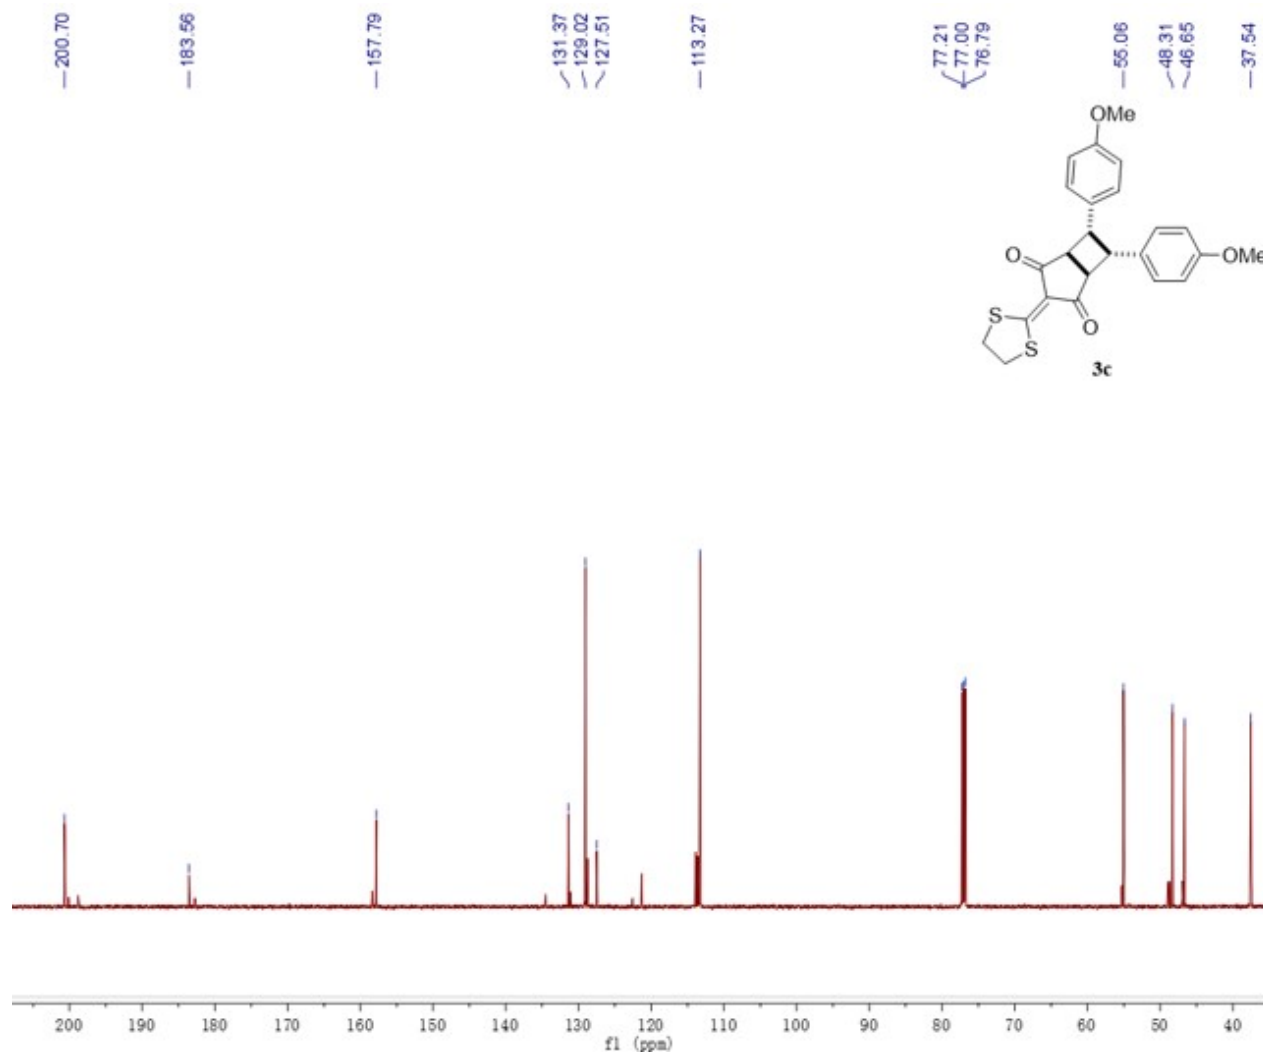

**<sup>1</sup>H spectrum (600 MHz, CDCl<sub>3</sub>) of compound 2d/2d'**

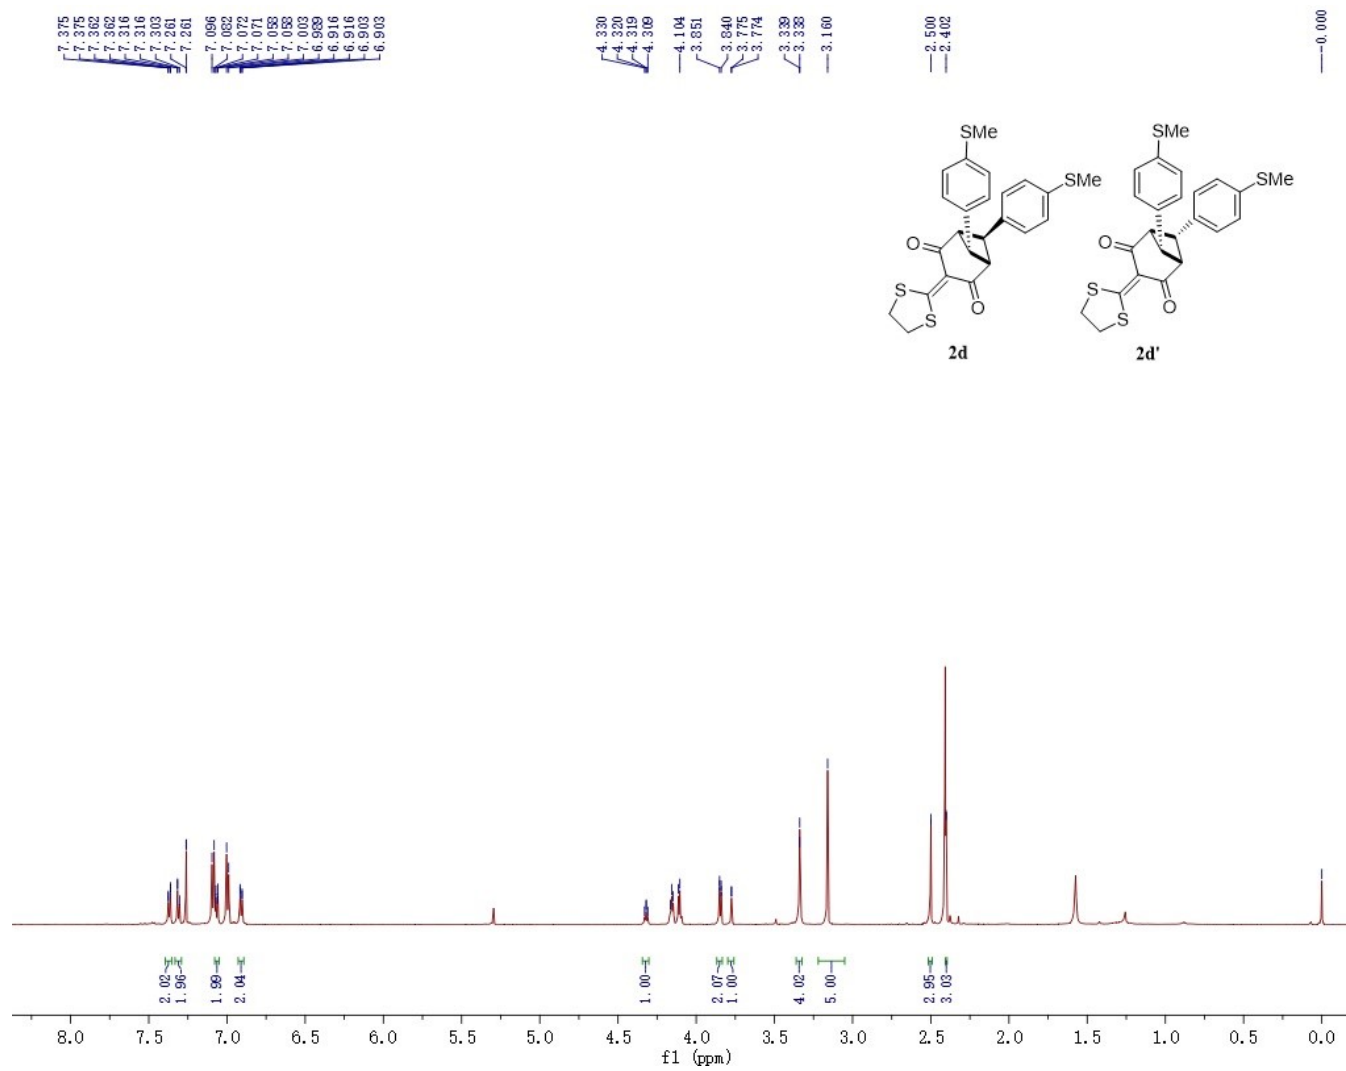

**$^{13}\text{C}$  spectrum (151 MHz,  $\text{CDCl}_3$ ) of compound 2d/2d'**

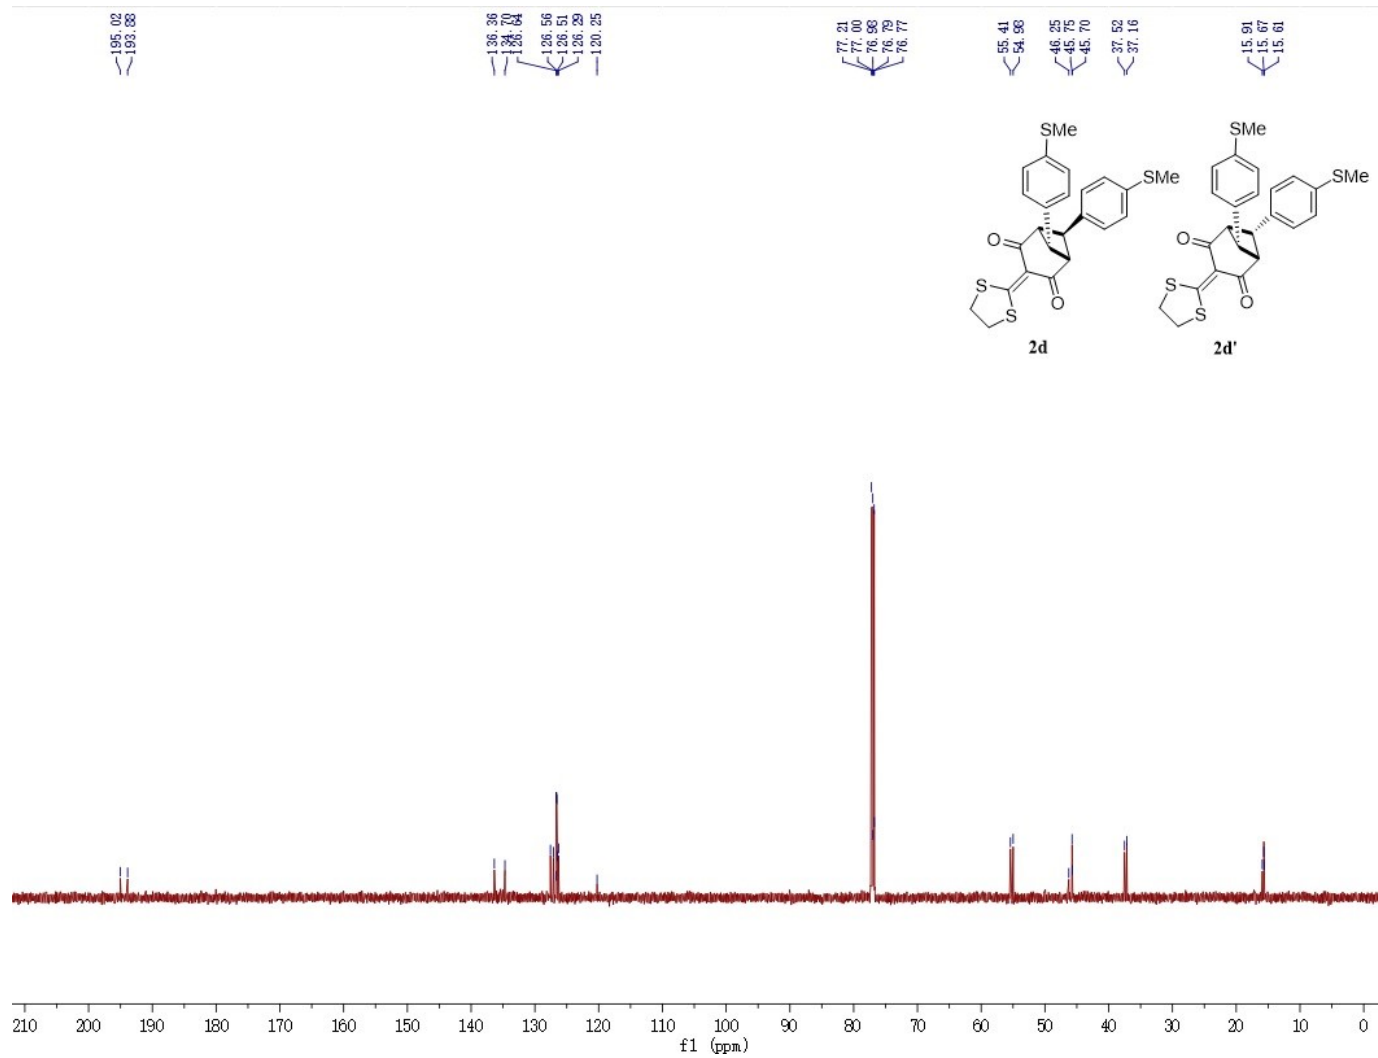

<sup>1</sup>H spectrum (500 MHz, CDCl<sub>3</sub>) of compound 3d

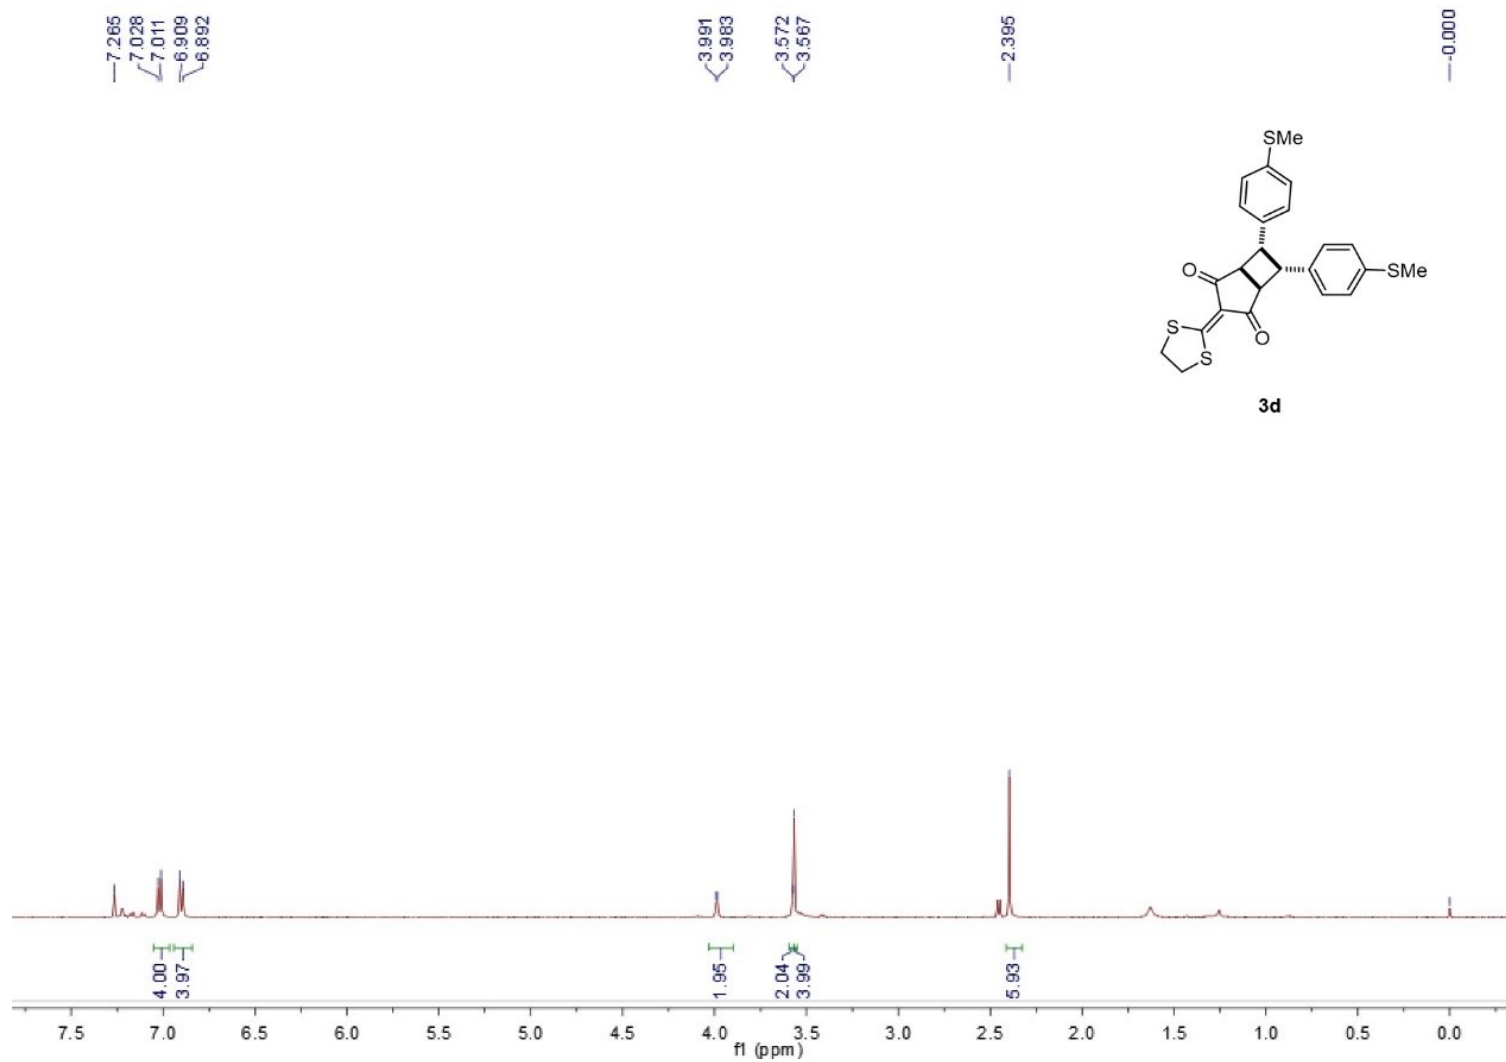

<sup>13</sup>C spectrum (151 MHz, CDCl<sub>3</sub>) of compound 3d

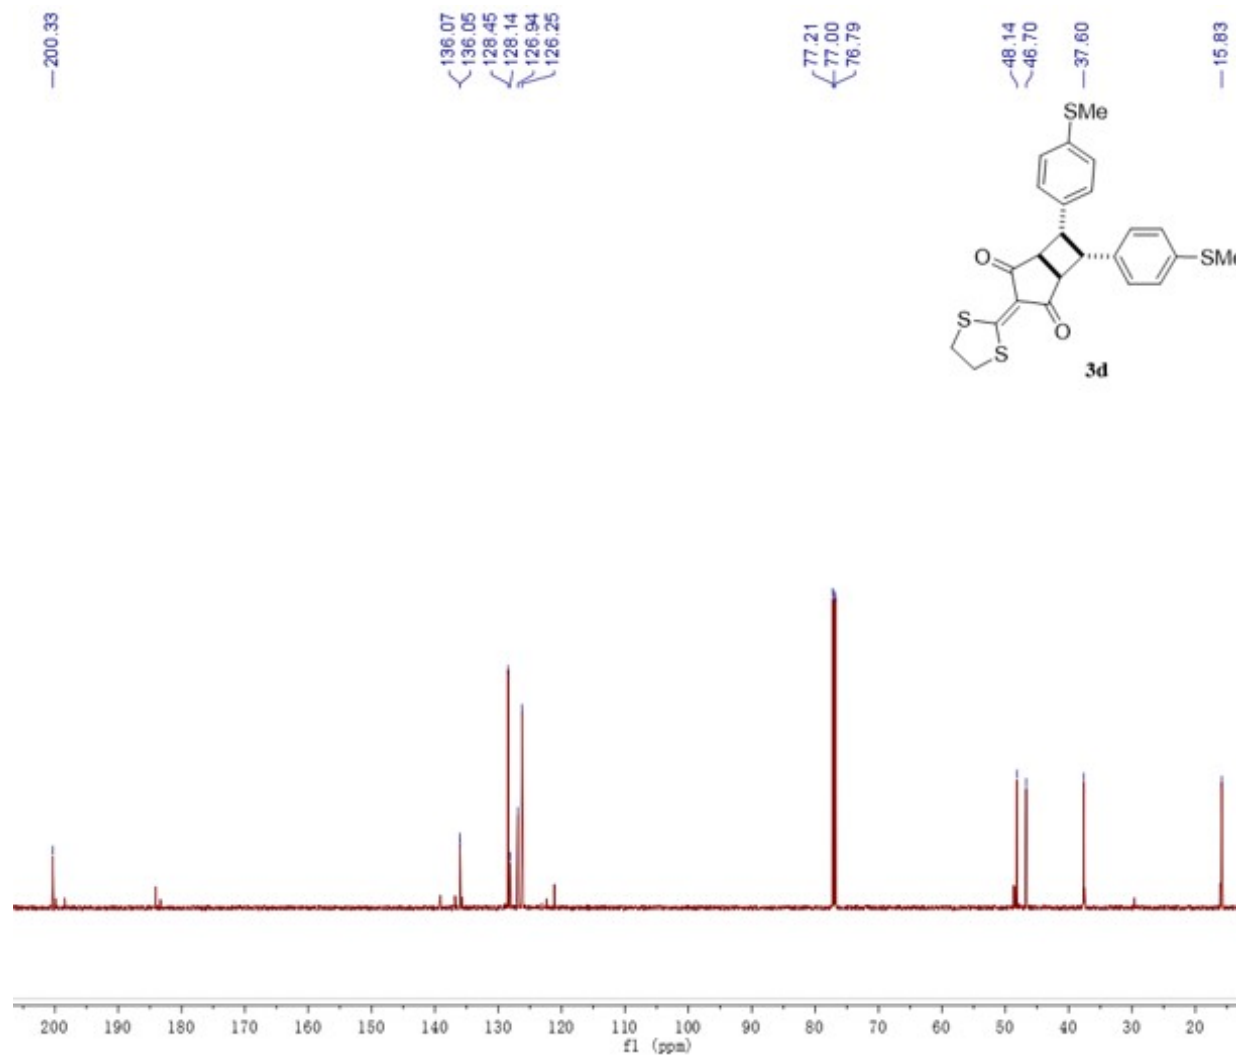

<sup>1</sup>H spectrum (500 MHz, CDCl<sub>3</sub>) of compound 2e

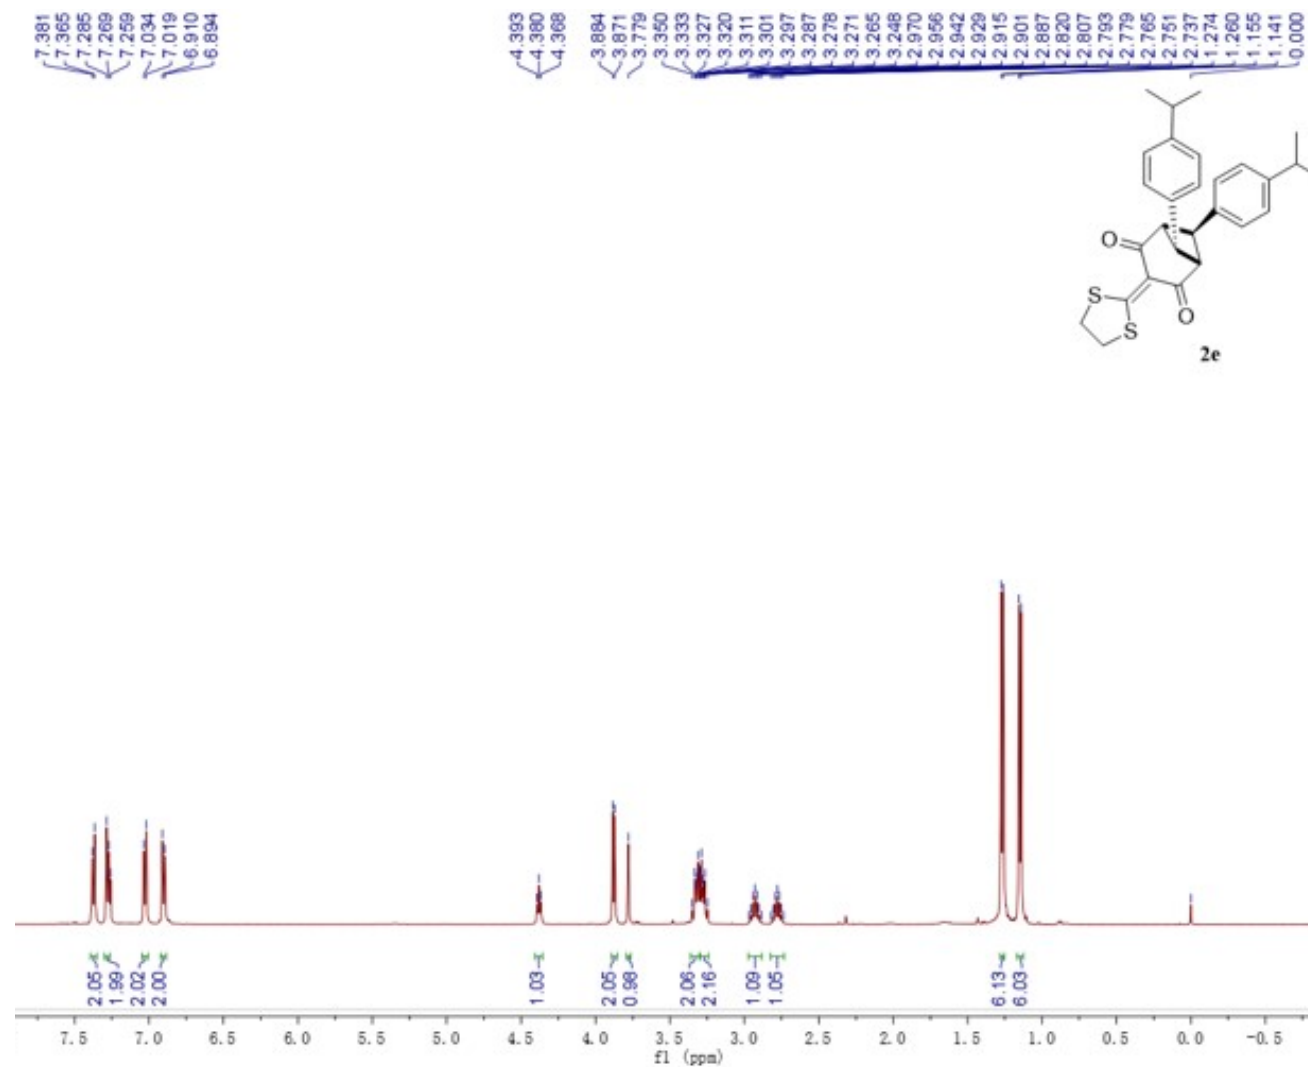

<sup>13</sup>C spectrum (151 MHz, CDCl<sub>3</sub>) of compound 2e

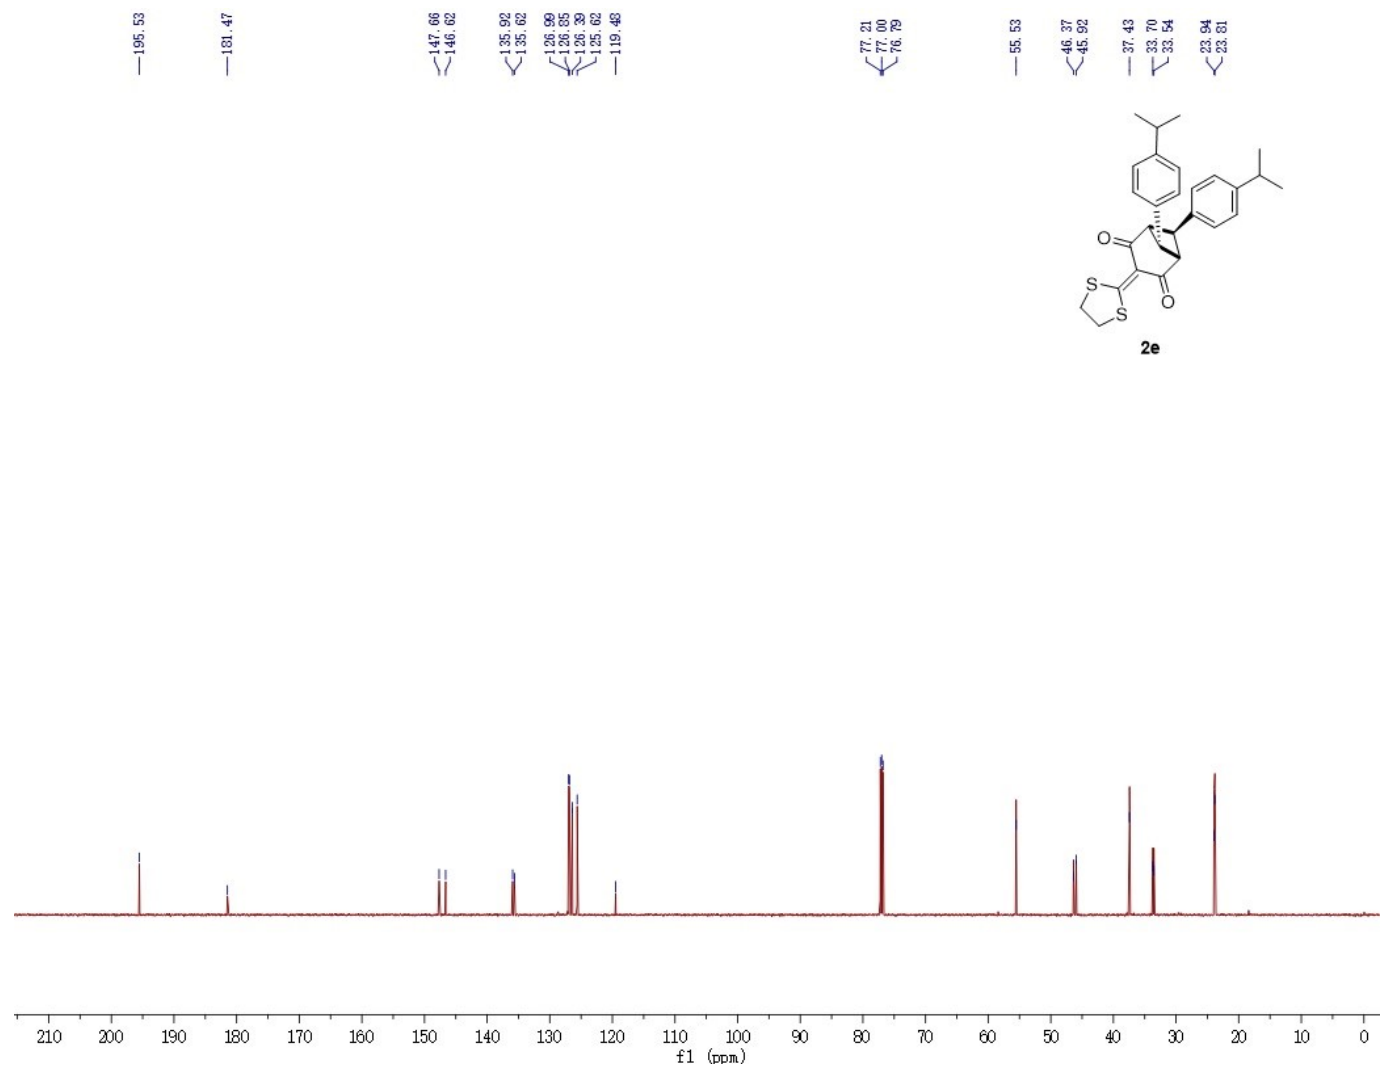



<sup>1</sup>H spectrum (600 MHz, CDCl<sub>3</sub>) of compound 2e'

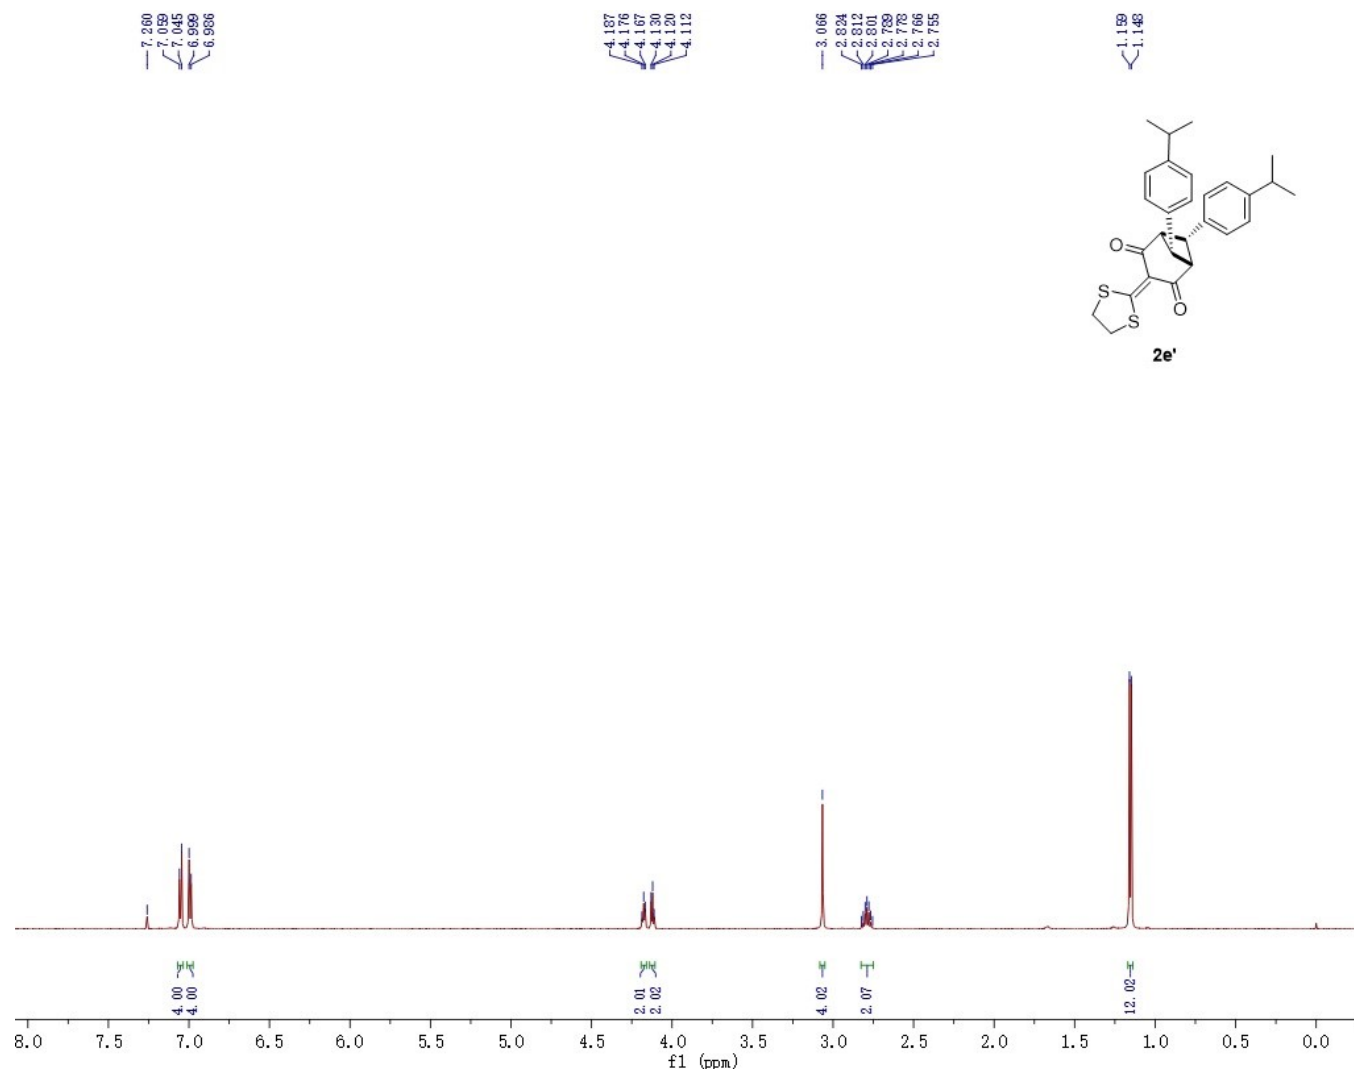

**$^{13}\text{C}$  spectrum (151 MHz,  $\text{CDCl}_3$ ) of compound **2e'****

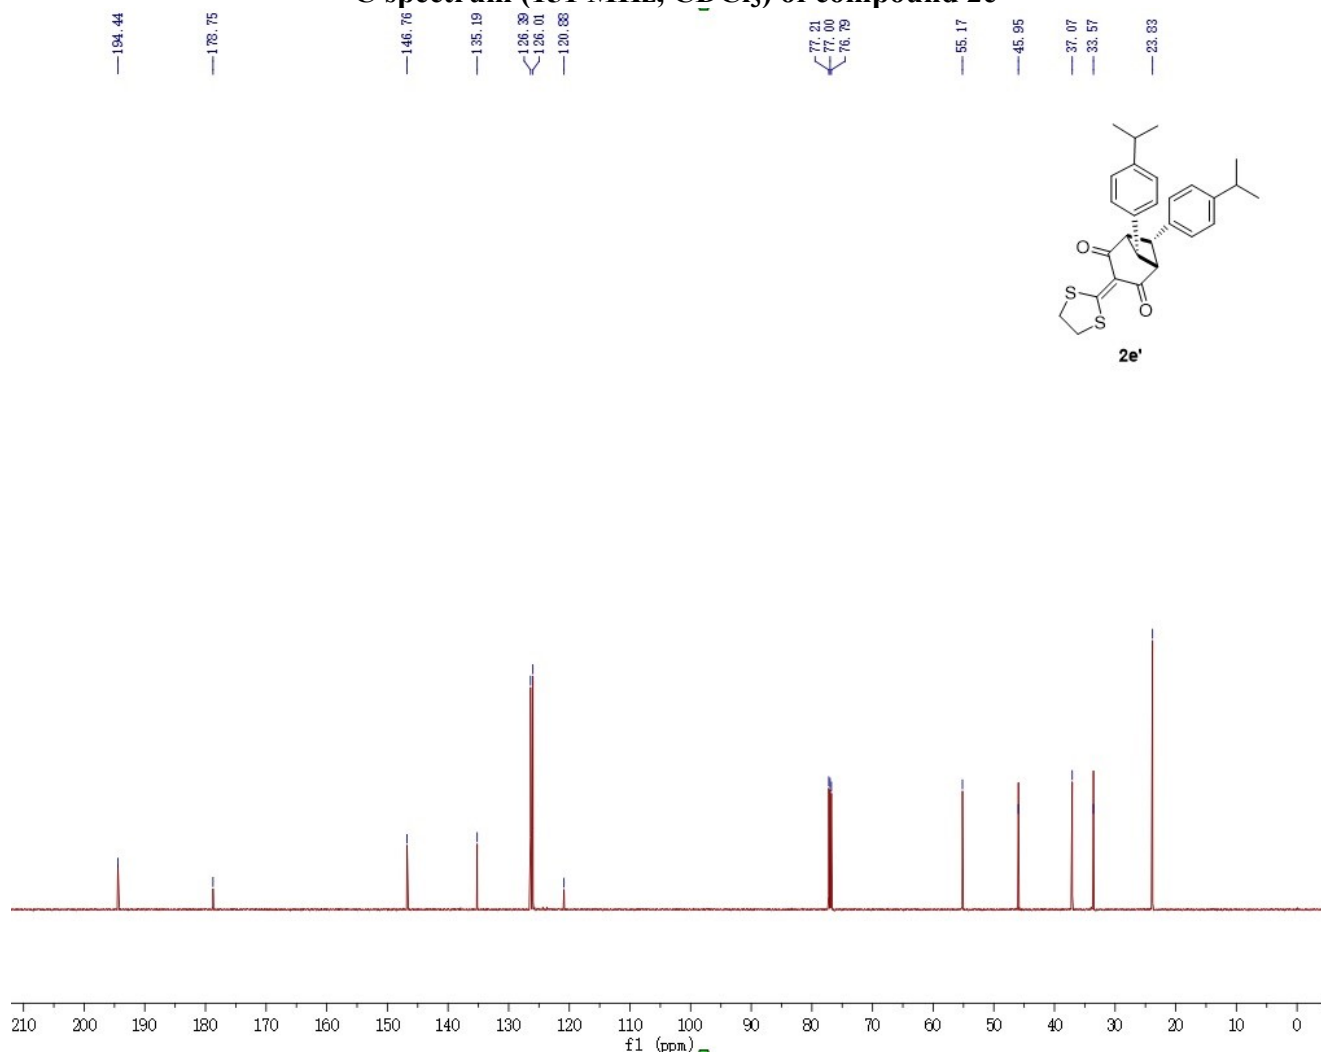

<sup>1</sup>H spectrum (600 MHz, CDCl<sub>3</sub>) of compound 3e

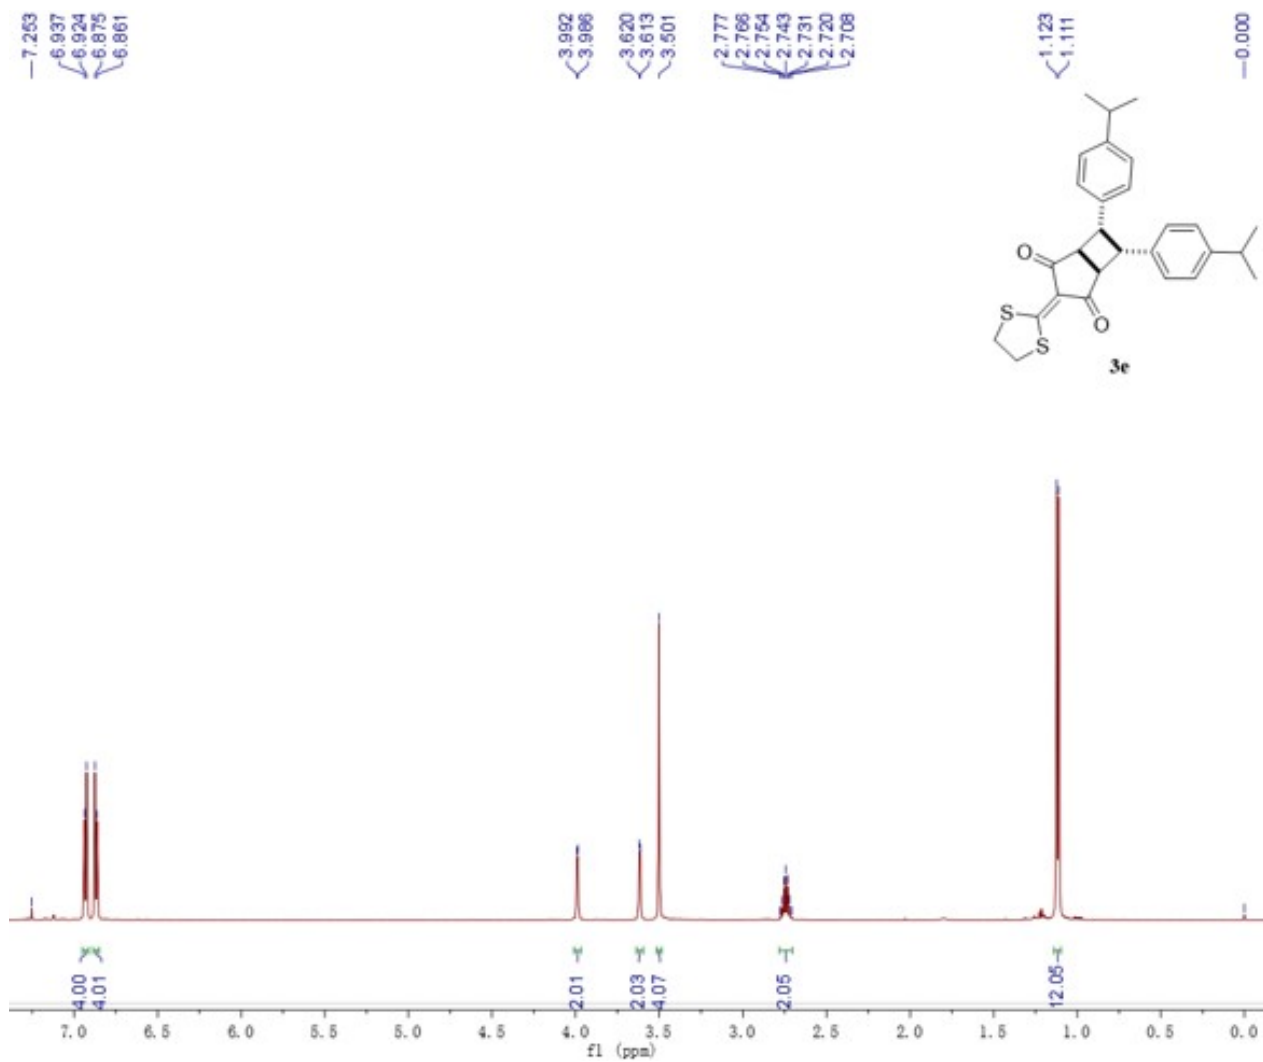

<sup>13</sup>C spectrum (151 MHz, CDCl<sub>3</sub>) of compound 3e

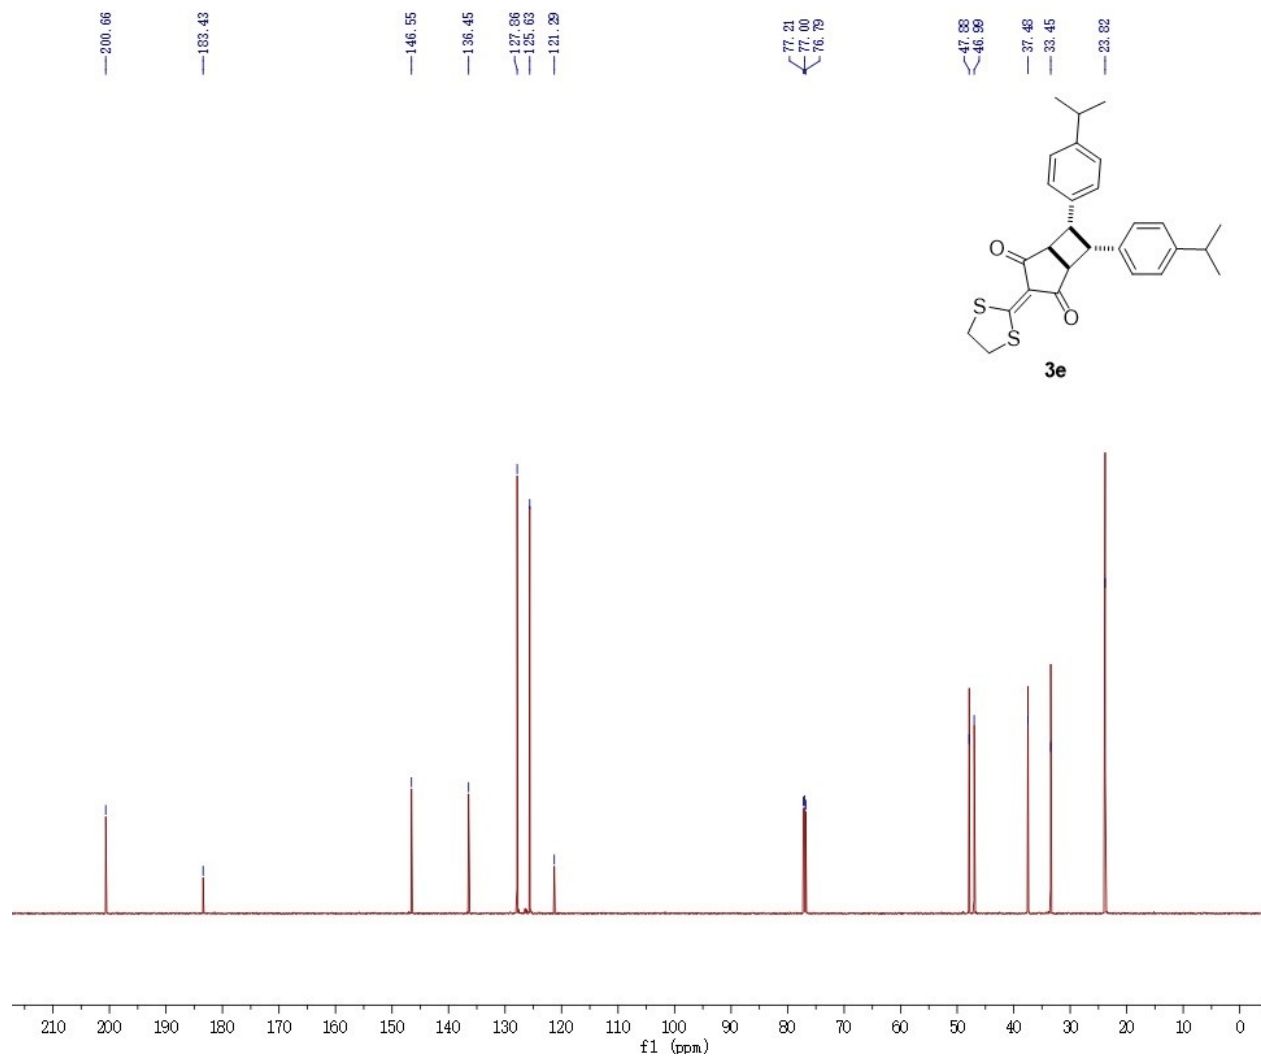

<sup>1</sup>H spectrum (600 MHz, CDCl<sub>3</sub>) of compound 2f

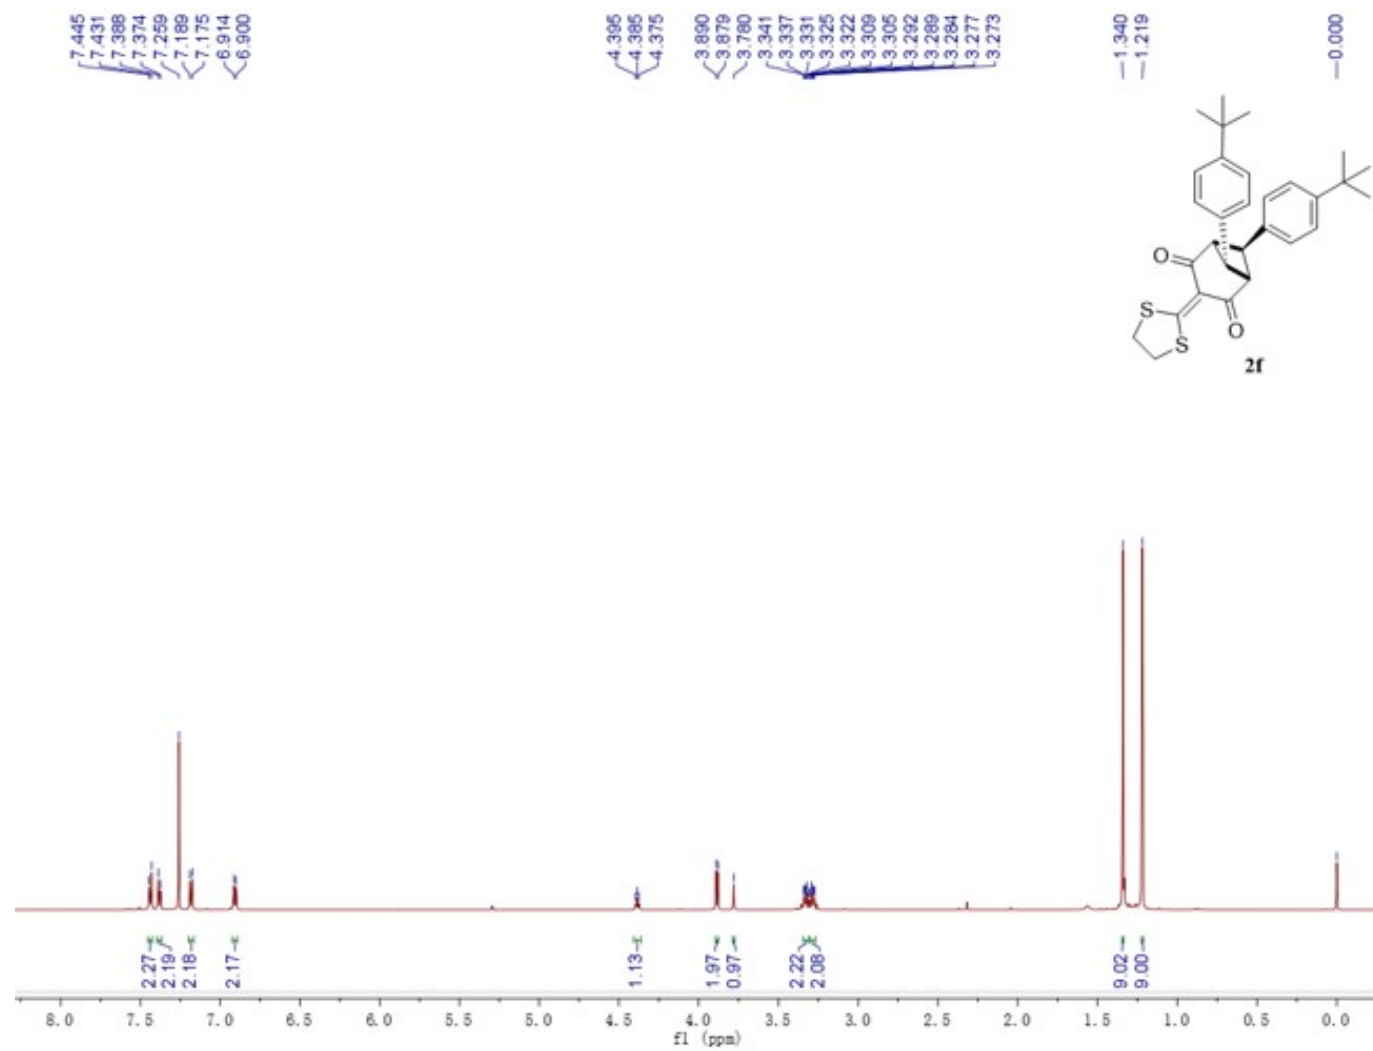

**<sup>13</sup>C spectrum (151 MHz, CDCl<sub>3</sub>) of compound 2f**

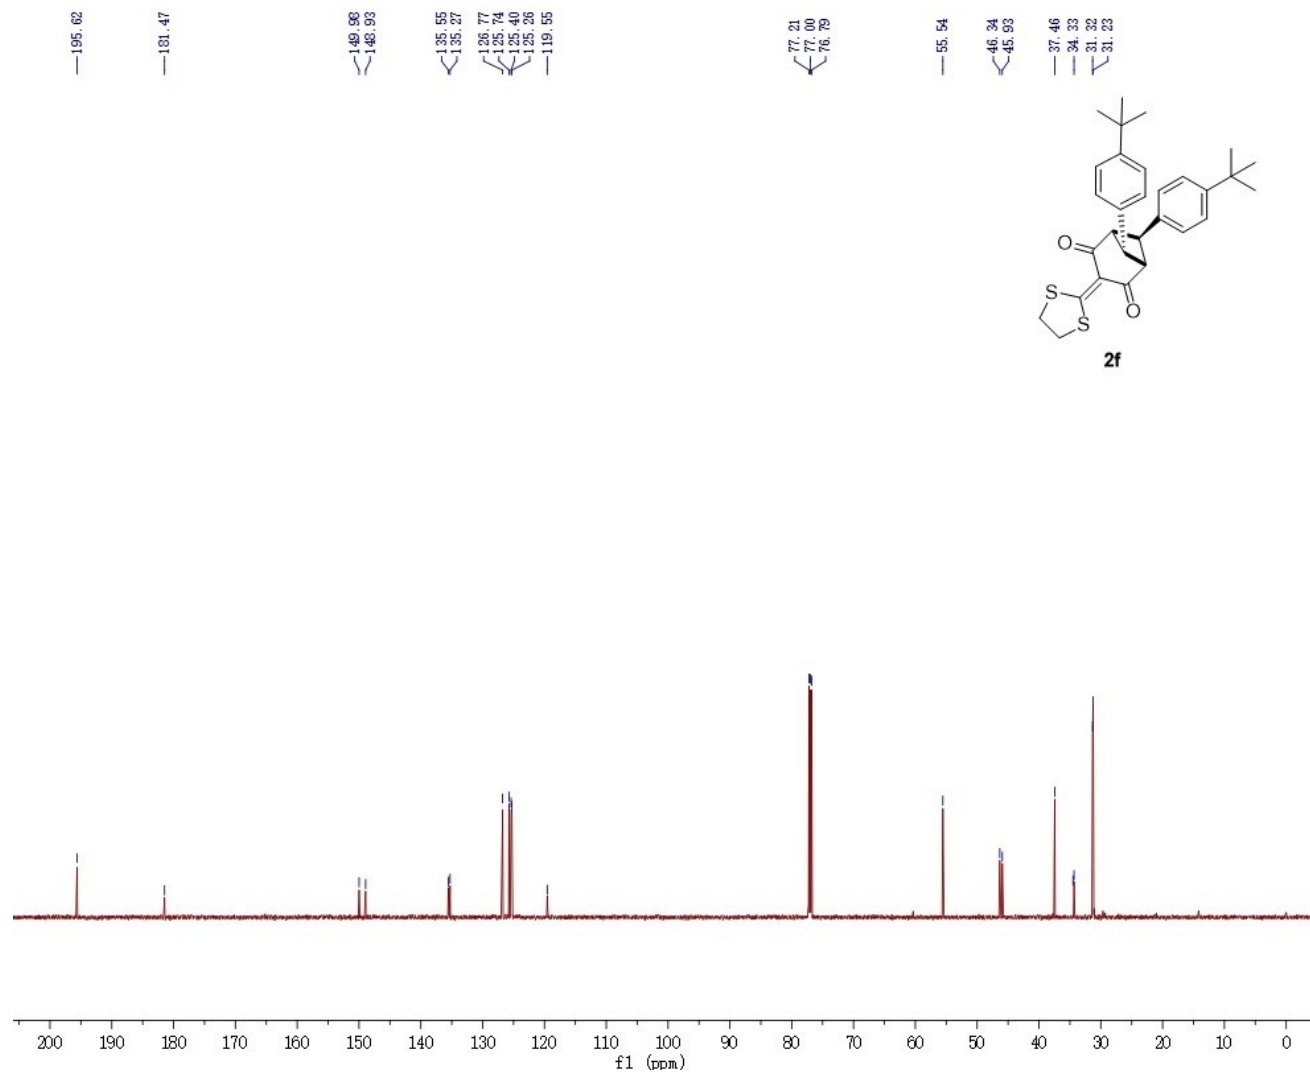

**<sup>1</sup>H spectrum (600 MHz, CDCl<sub>3</sub>) of compound 2f'**

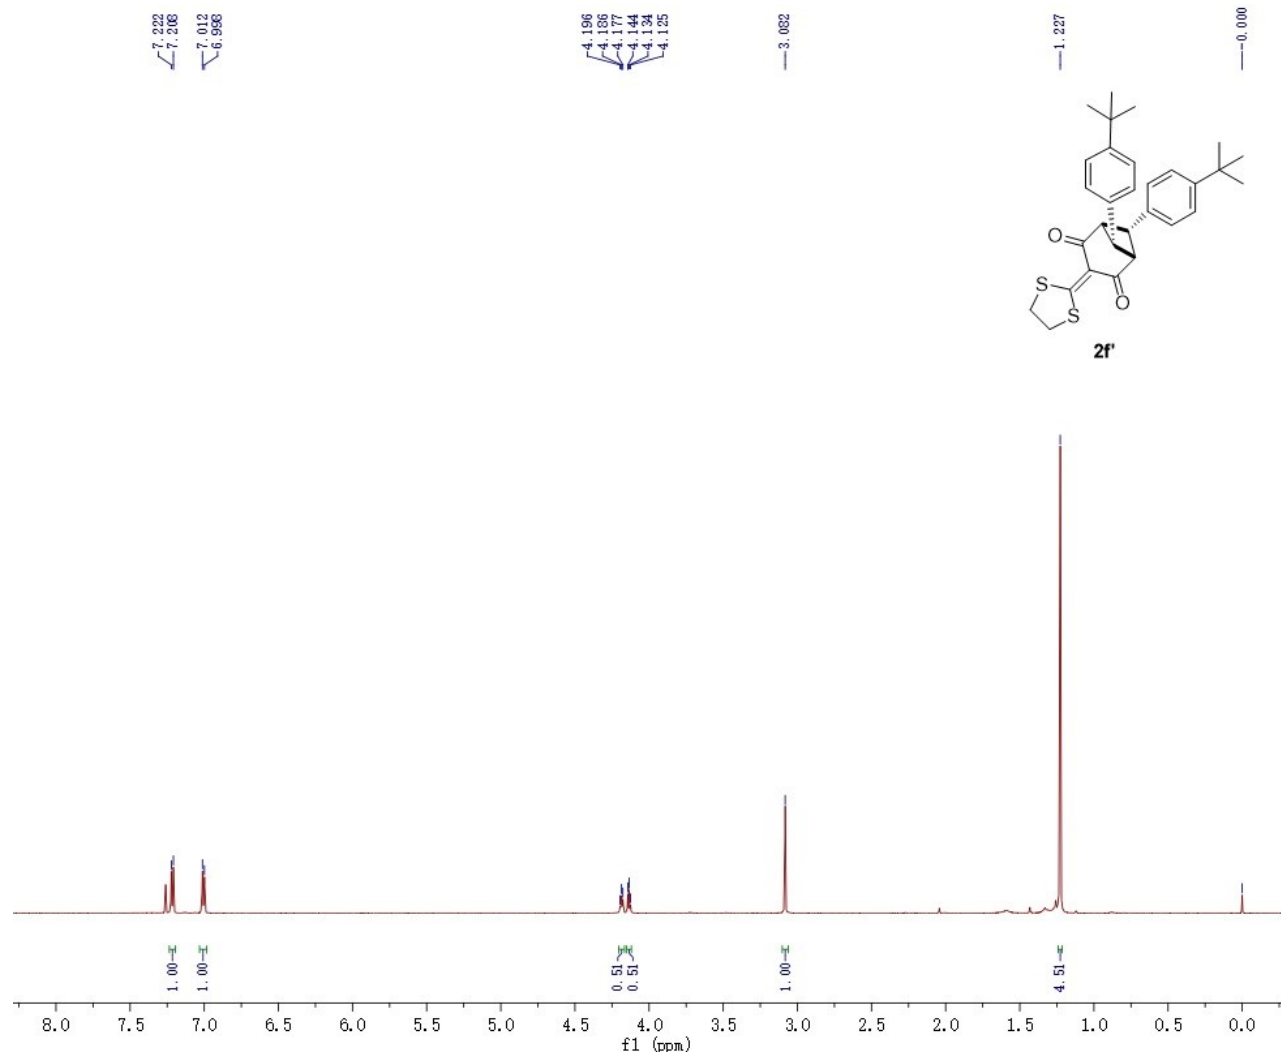

**$^{13}\text{C}$  spectrum (151 MHz,  $\text{CDCl}_3$ ) of compound **2f'****

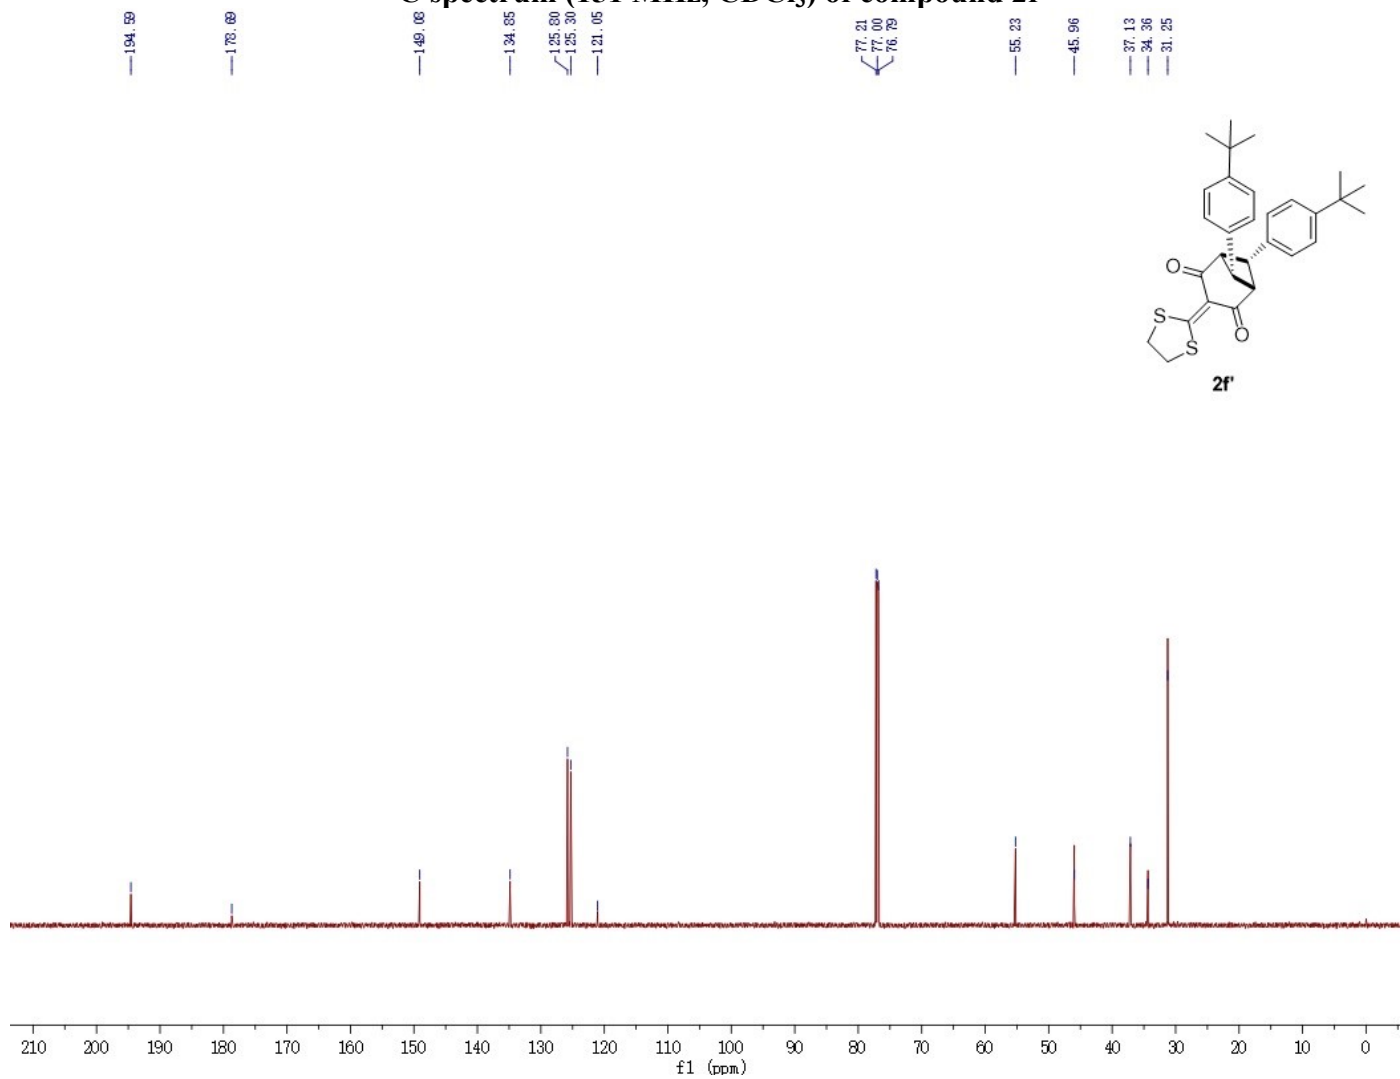



<sup>1</sup>H spectrum (600 MHz, CDCl<sub>3</sub>) of compound 3f

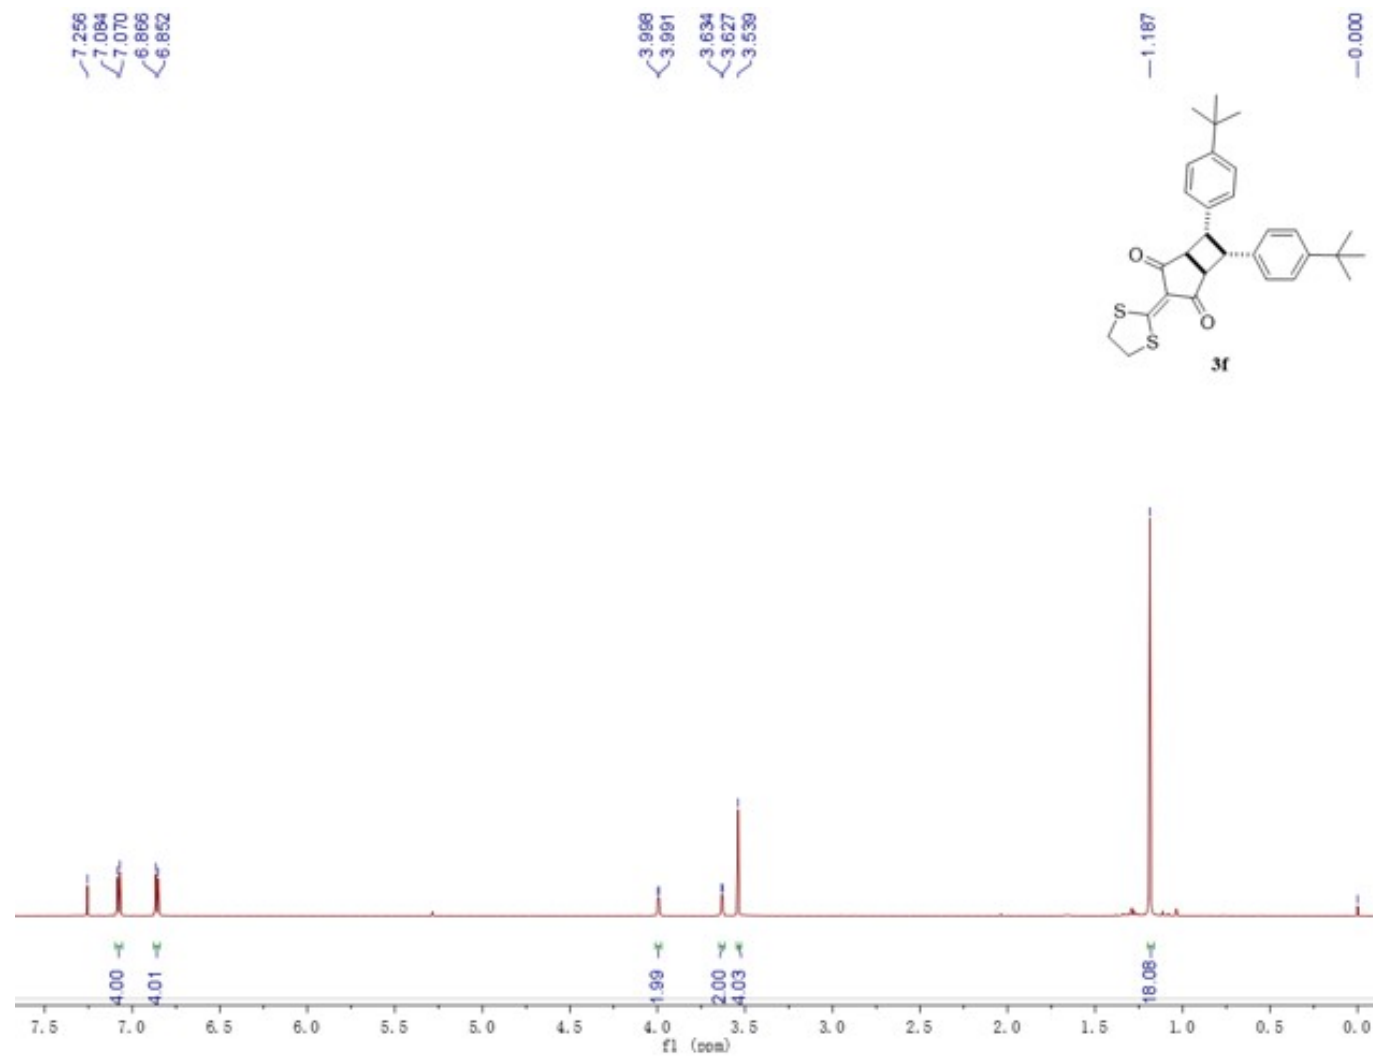

<sup>13</sup>C spectrum (151 MHz, CDCl<sub>3</sub>) of compound 3f

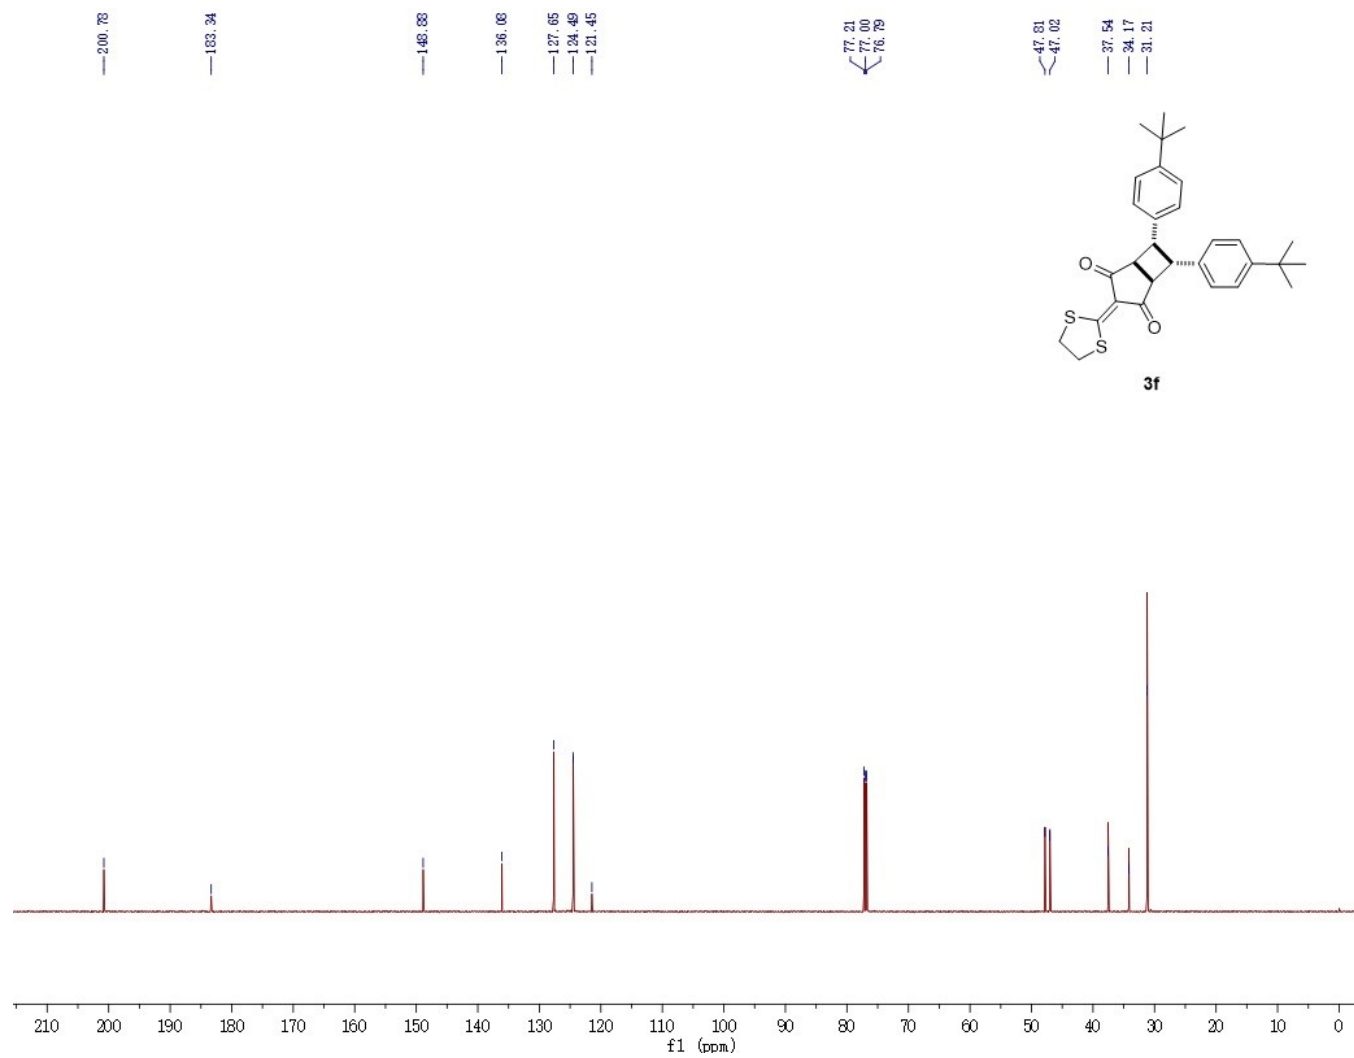

<sup>1</sup>H spectrum (600 MHz, CDCl<sub>3</sub>) of compound 2g

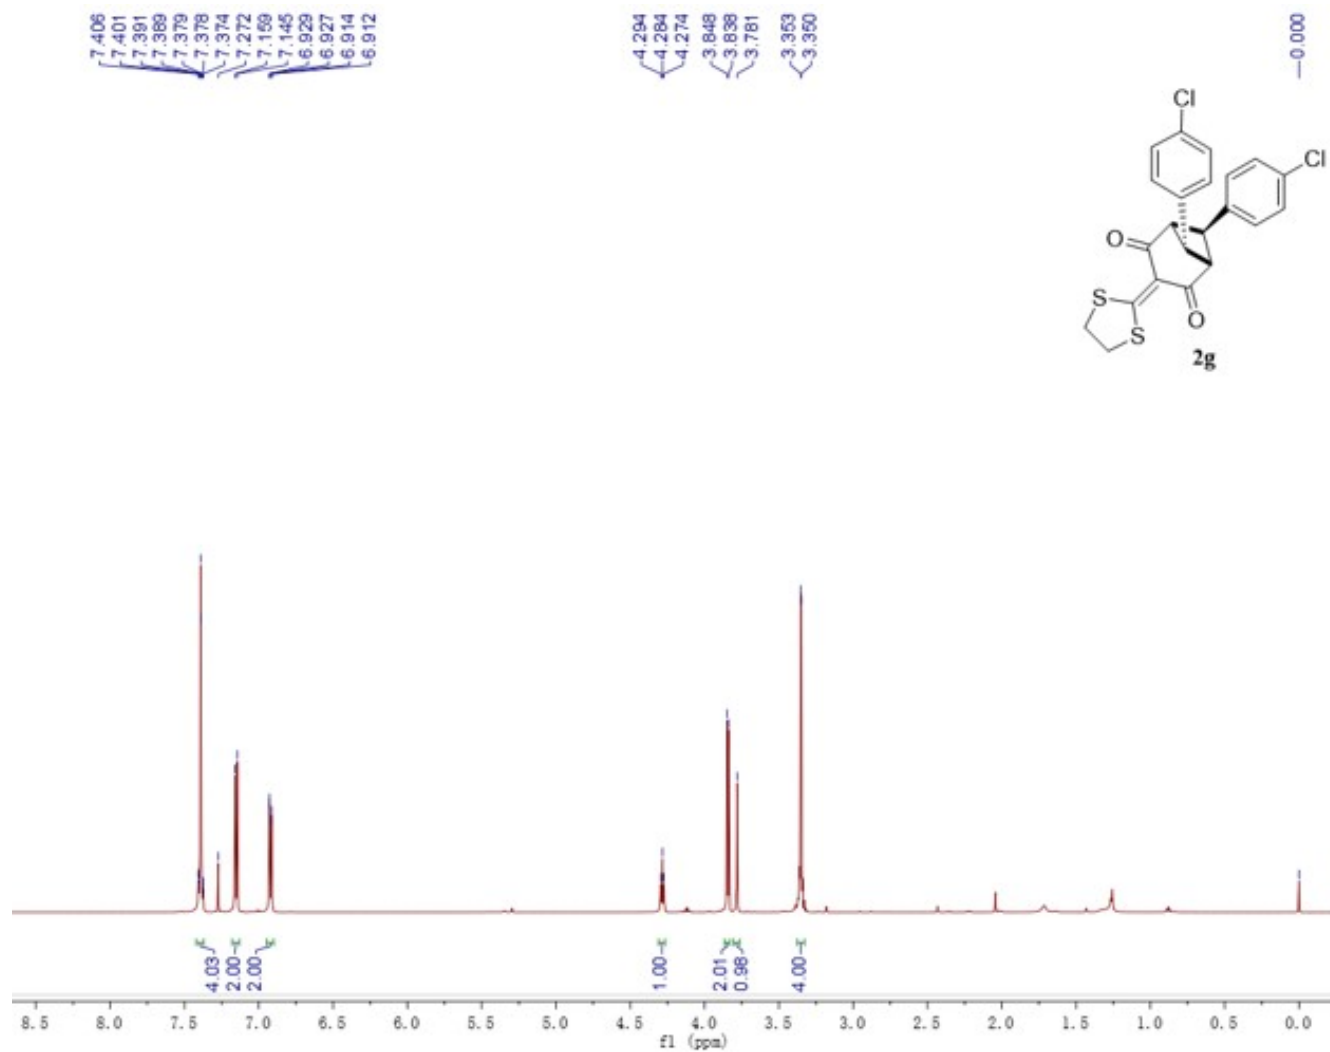

<sup>13</sup>C spectrum (151 MHz, CDCl<sub>3</sub>) of compound 2g

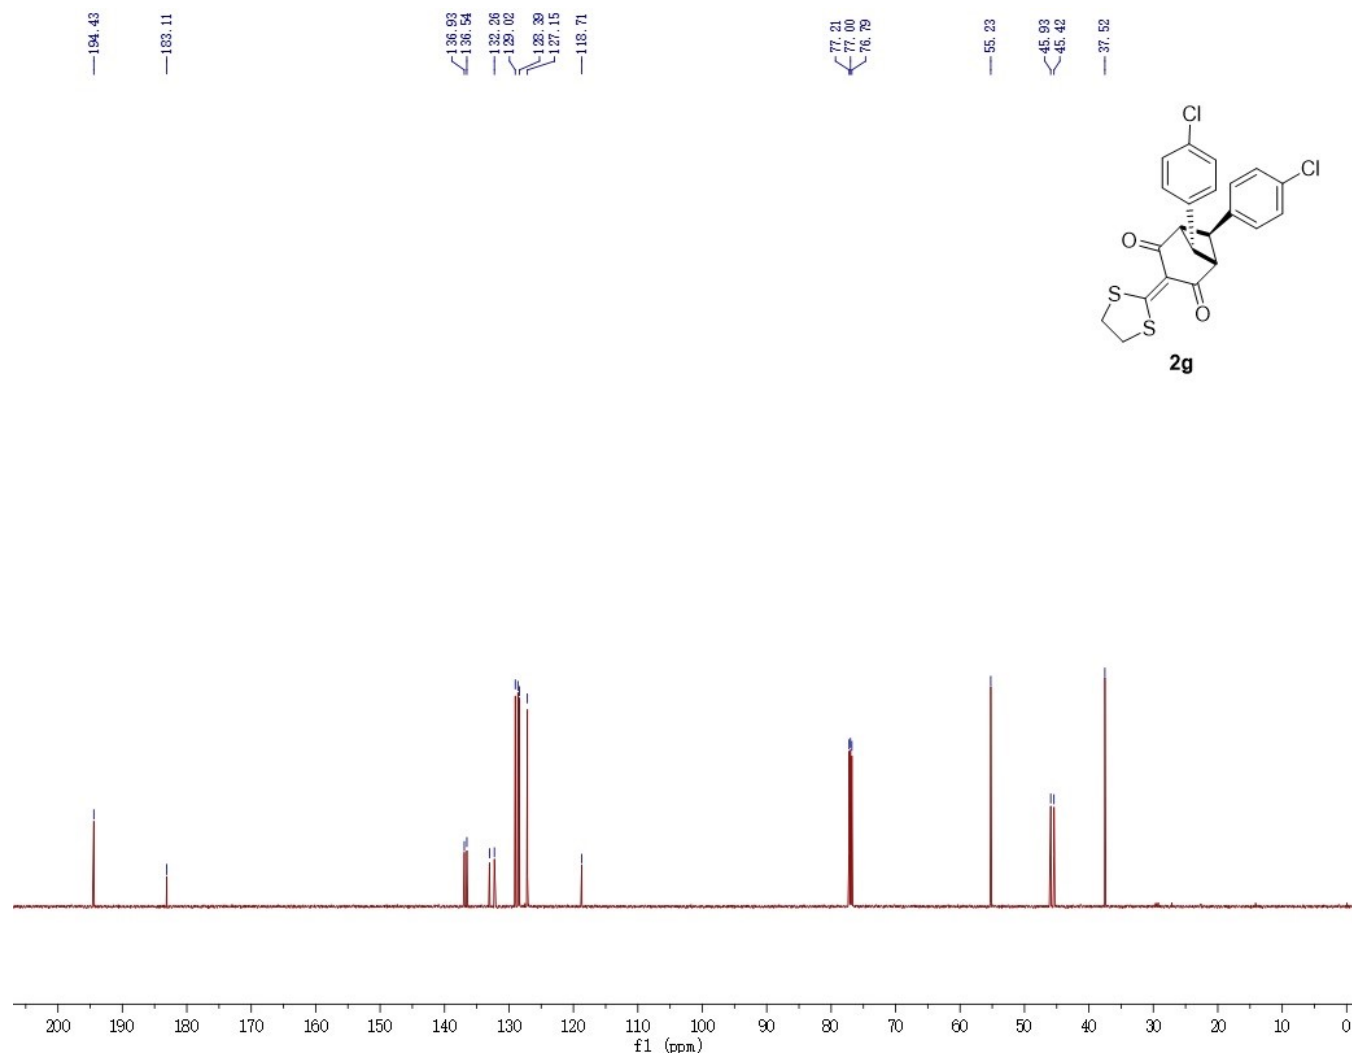

<sup>1</sup>H spectrum (600 MHz, CDCl<sub>3</sub>) of compound 2g'

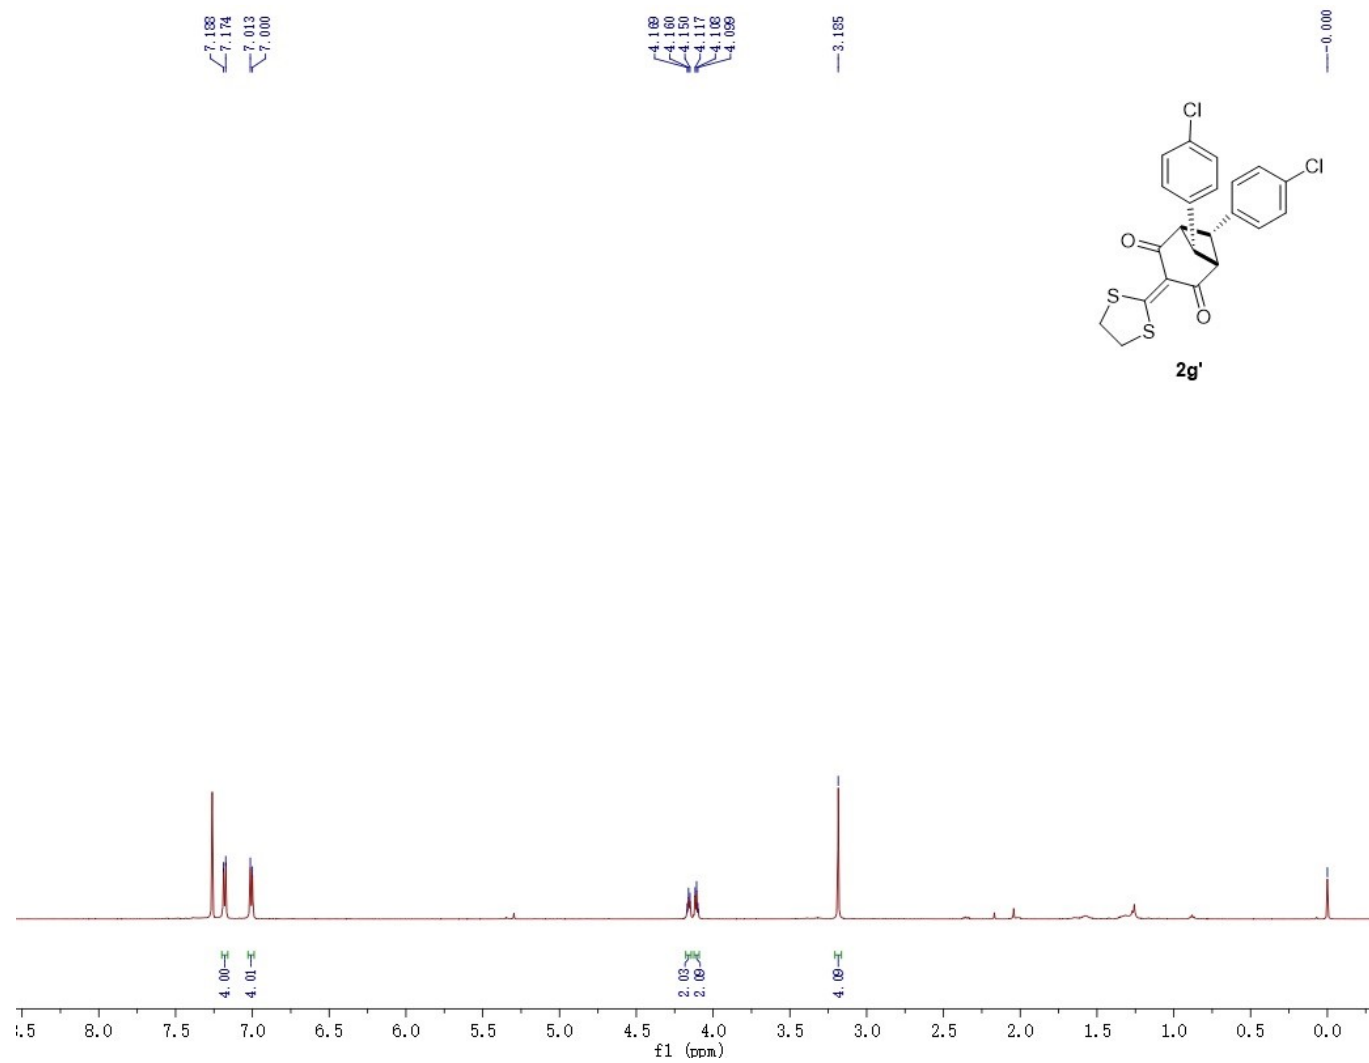

<sup>13</sup>C spectrum (151 MHz, CDCl<sub>3</sub>) of compound 2g'

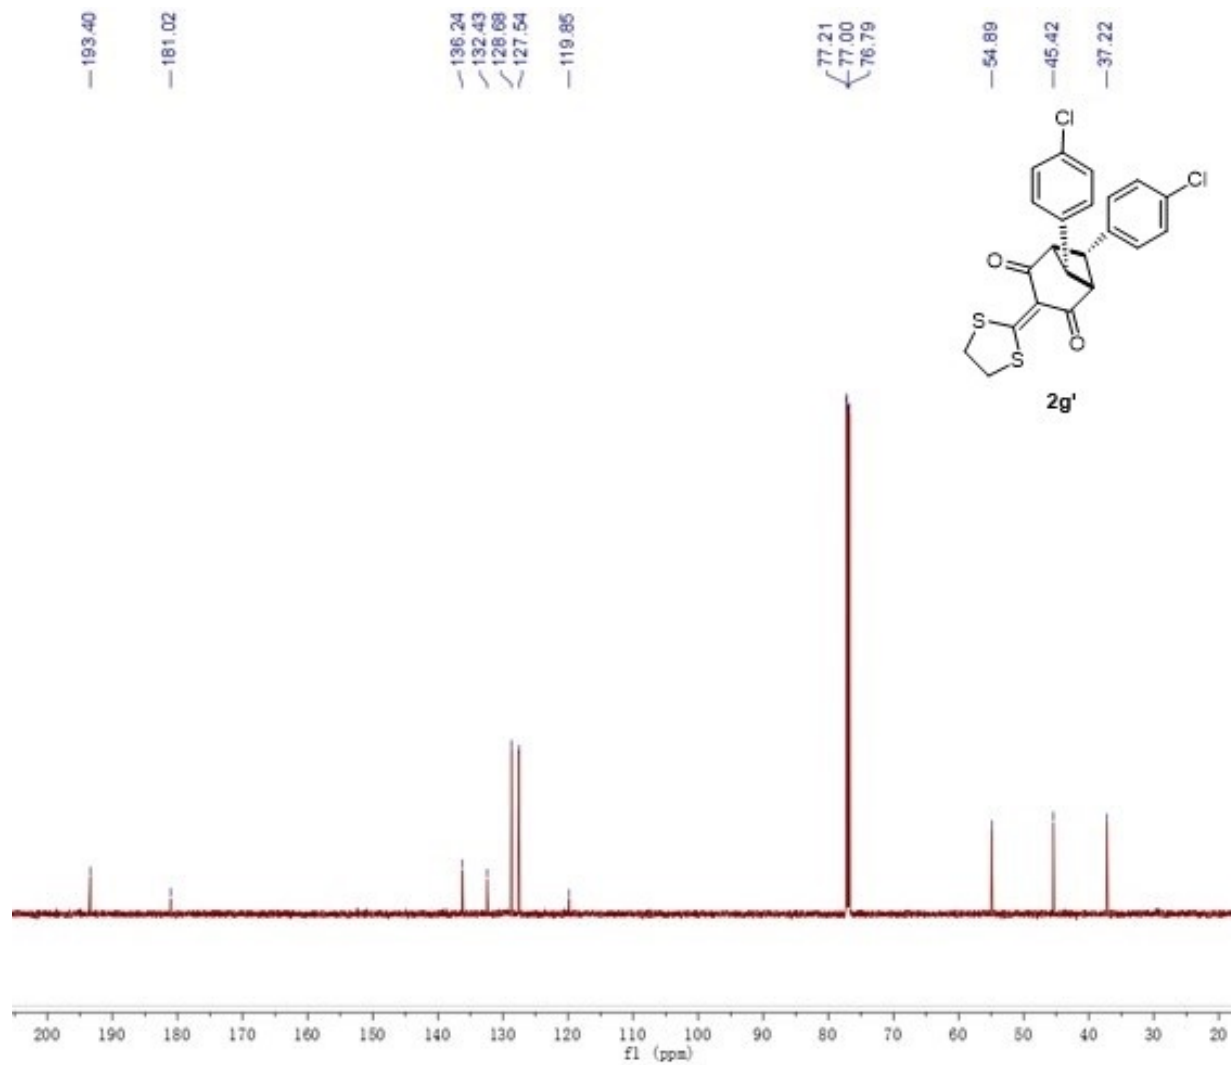

<sup>1</sup>H spectrum (600 MHz, CDCl<sub>3</sub>) of compound 3g

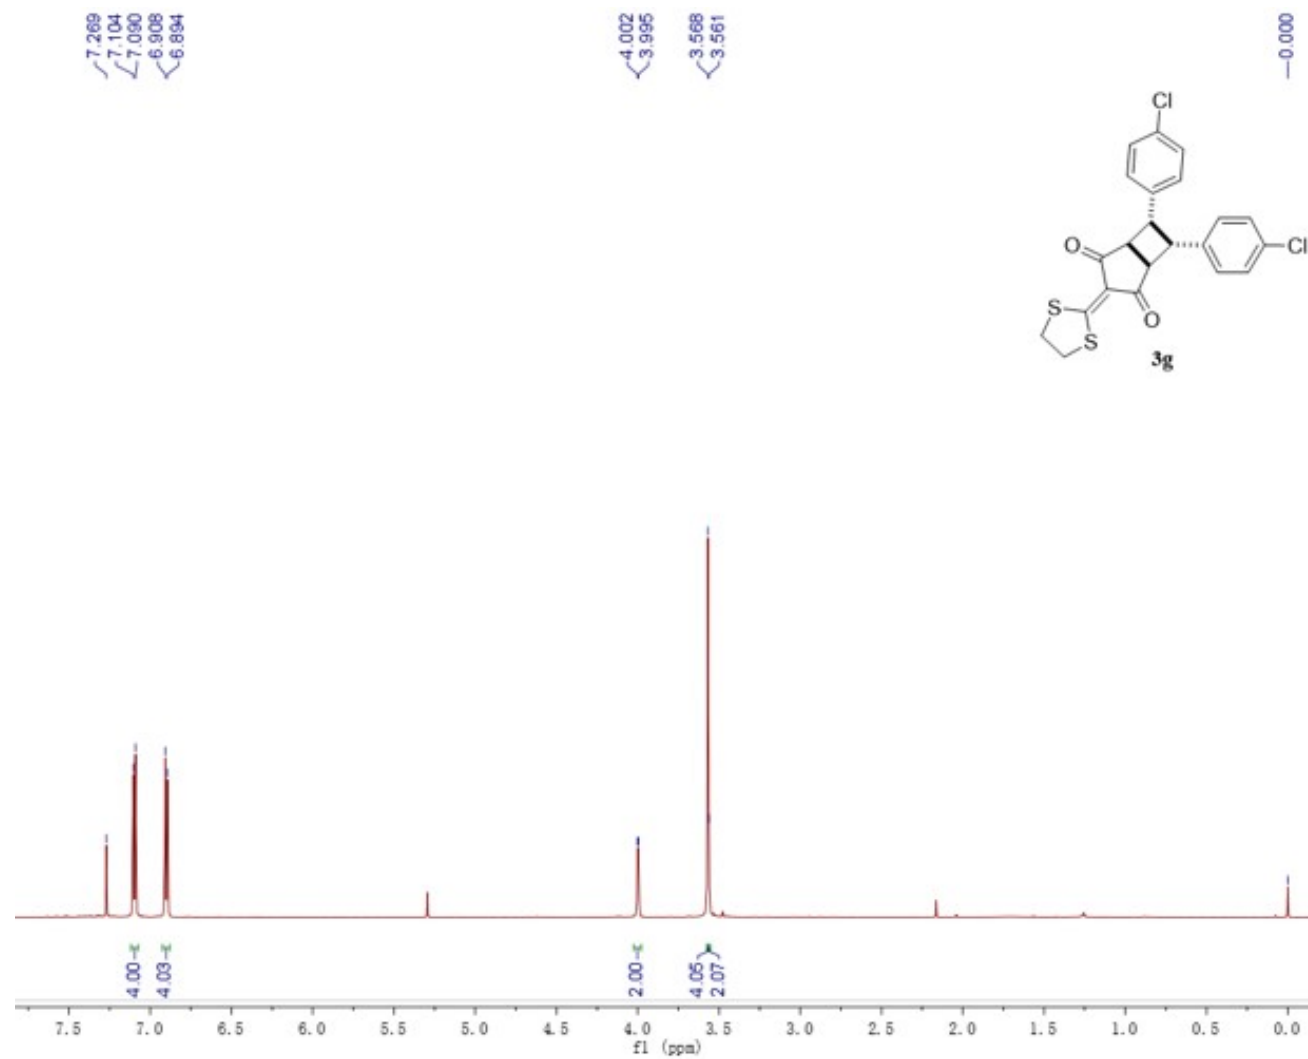

<sup>13</sup>C spectrum (151 MHz, CDCl<sub>3</sub>) of compound 3g

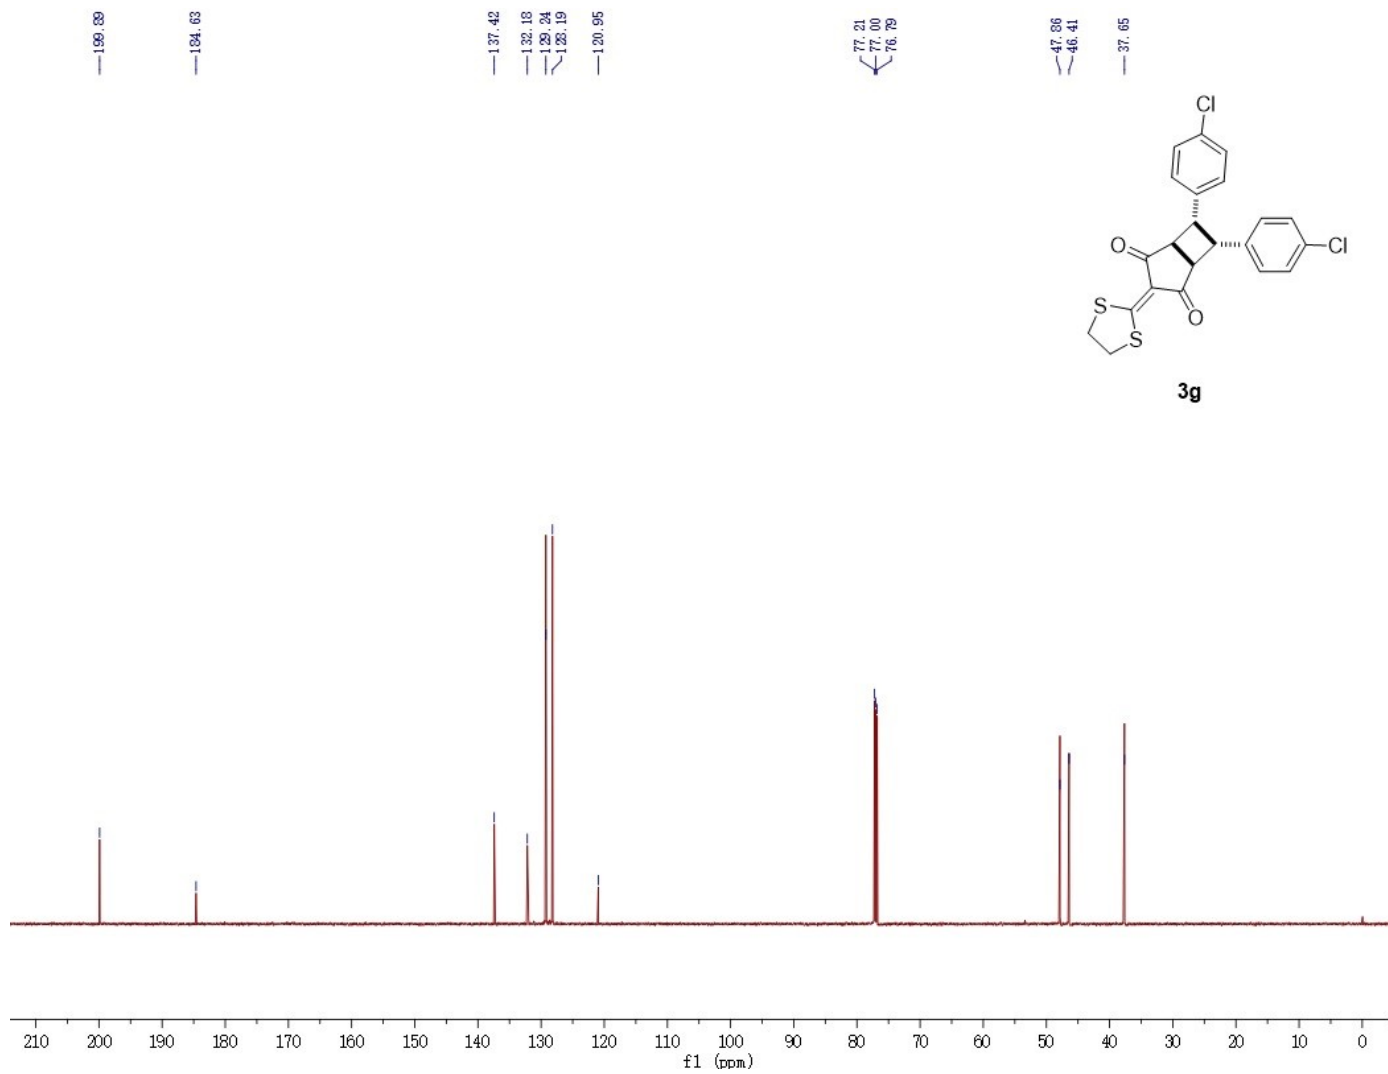



<sup>1</sup>H spectrum (600 MHz, CDCl<sub>3</sub>) of compound 2h

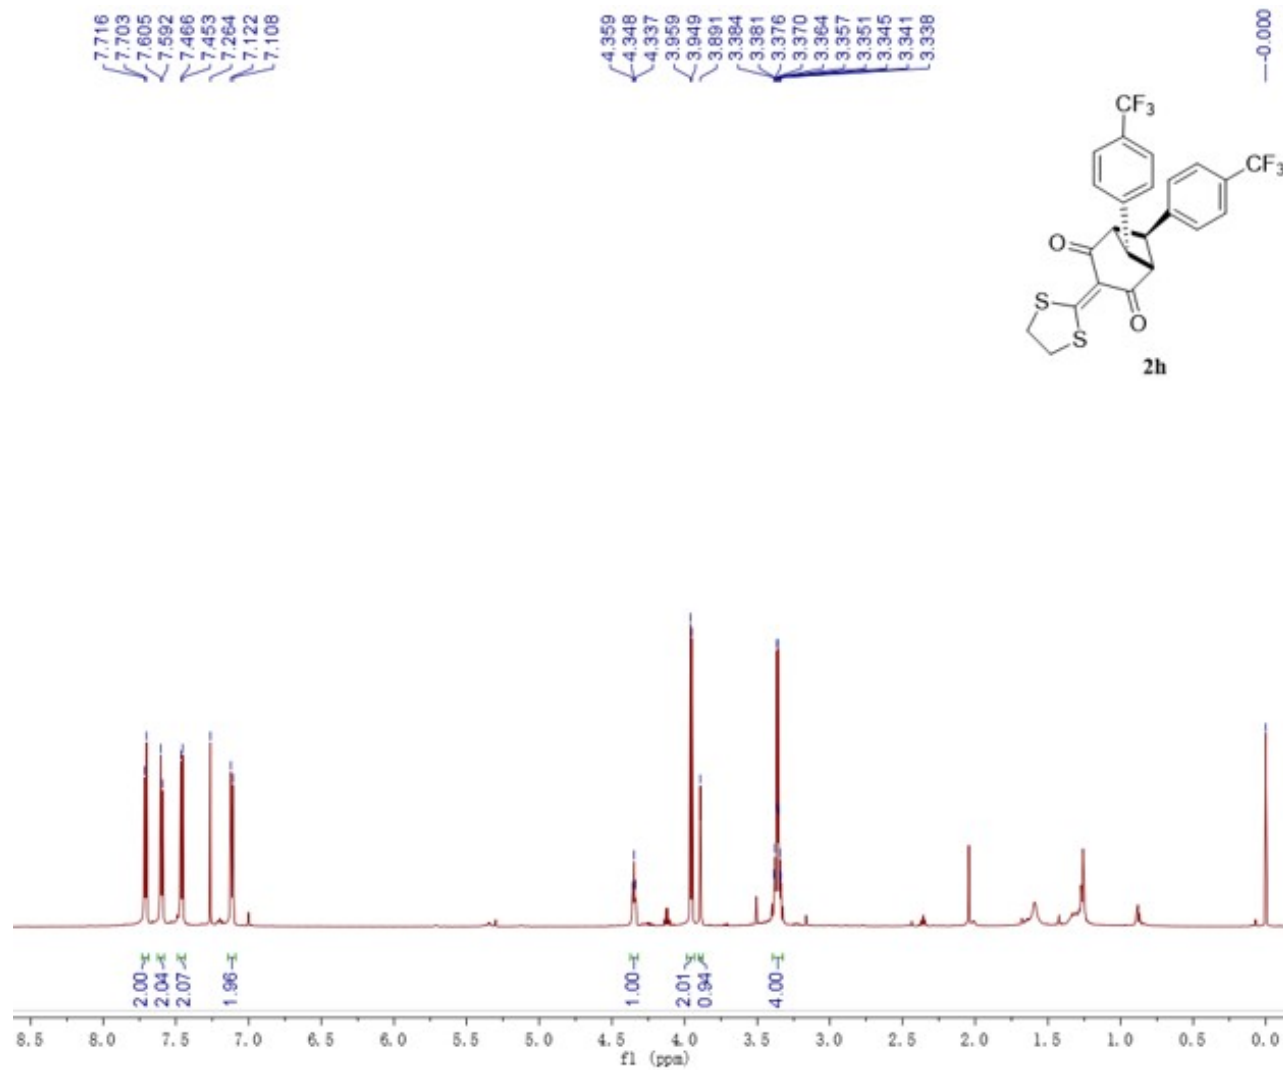

**<sup>13</sup>C spectrum (151 MHz, CDCl<sub>3</sub>) of compound 2h**

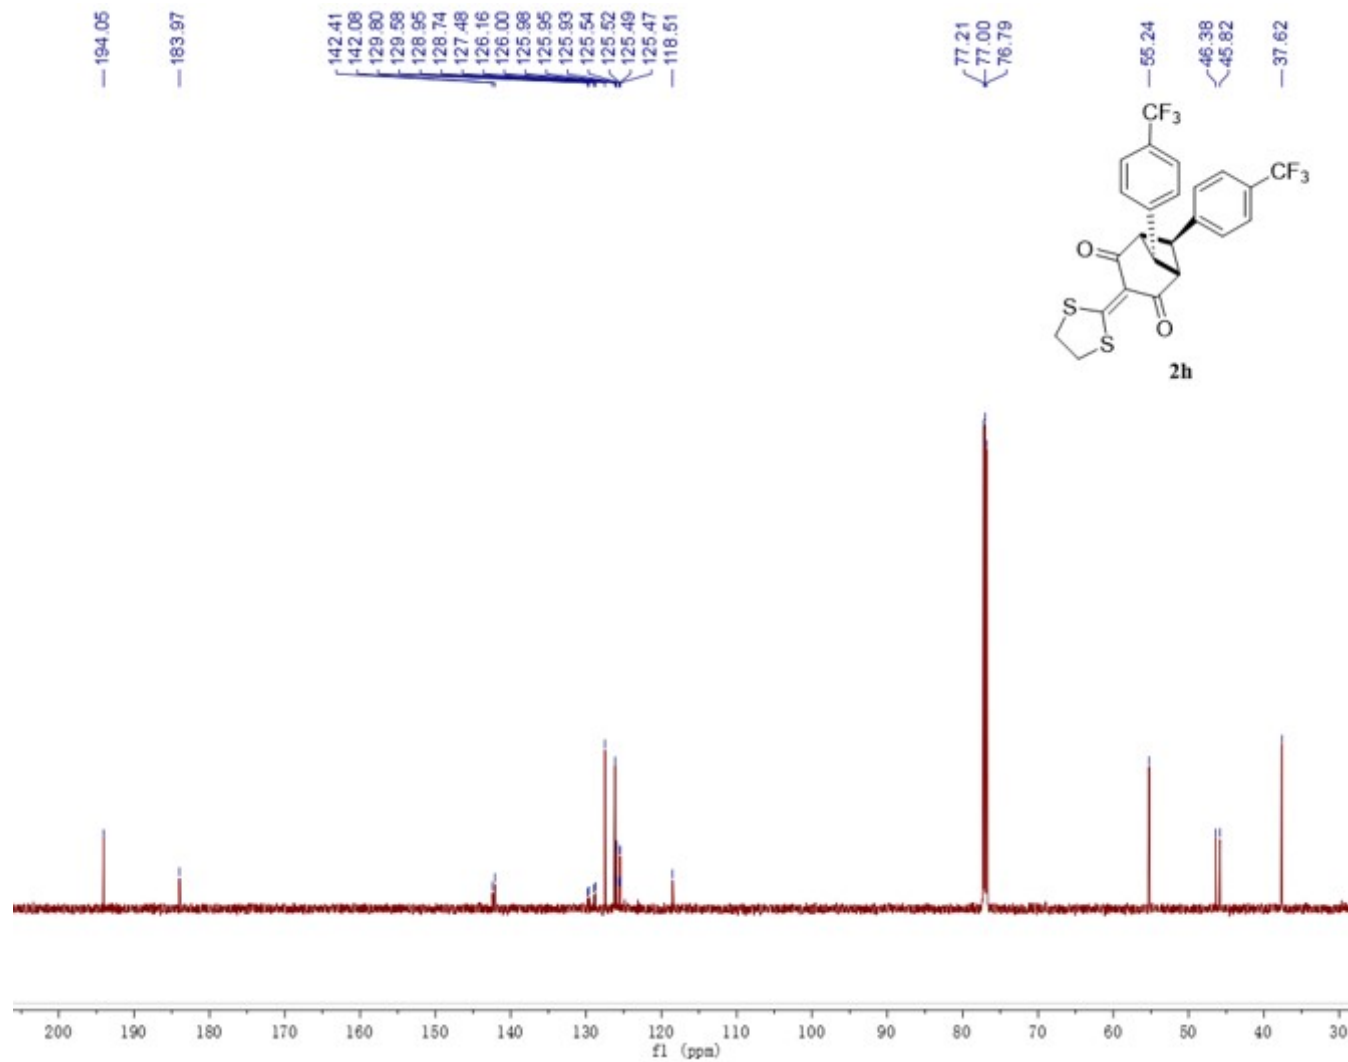

**<sup>1</sup>H spectrum (500 MHz, CDCl<sub>3</sub>) of compound 2h'**

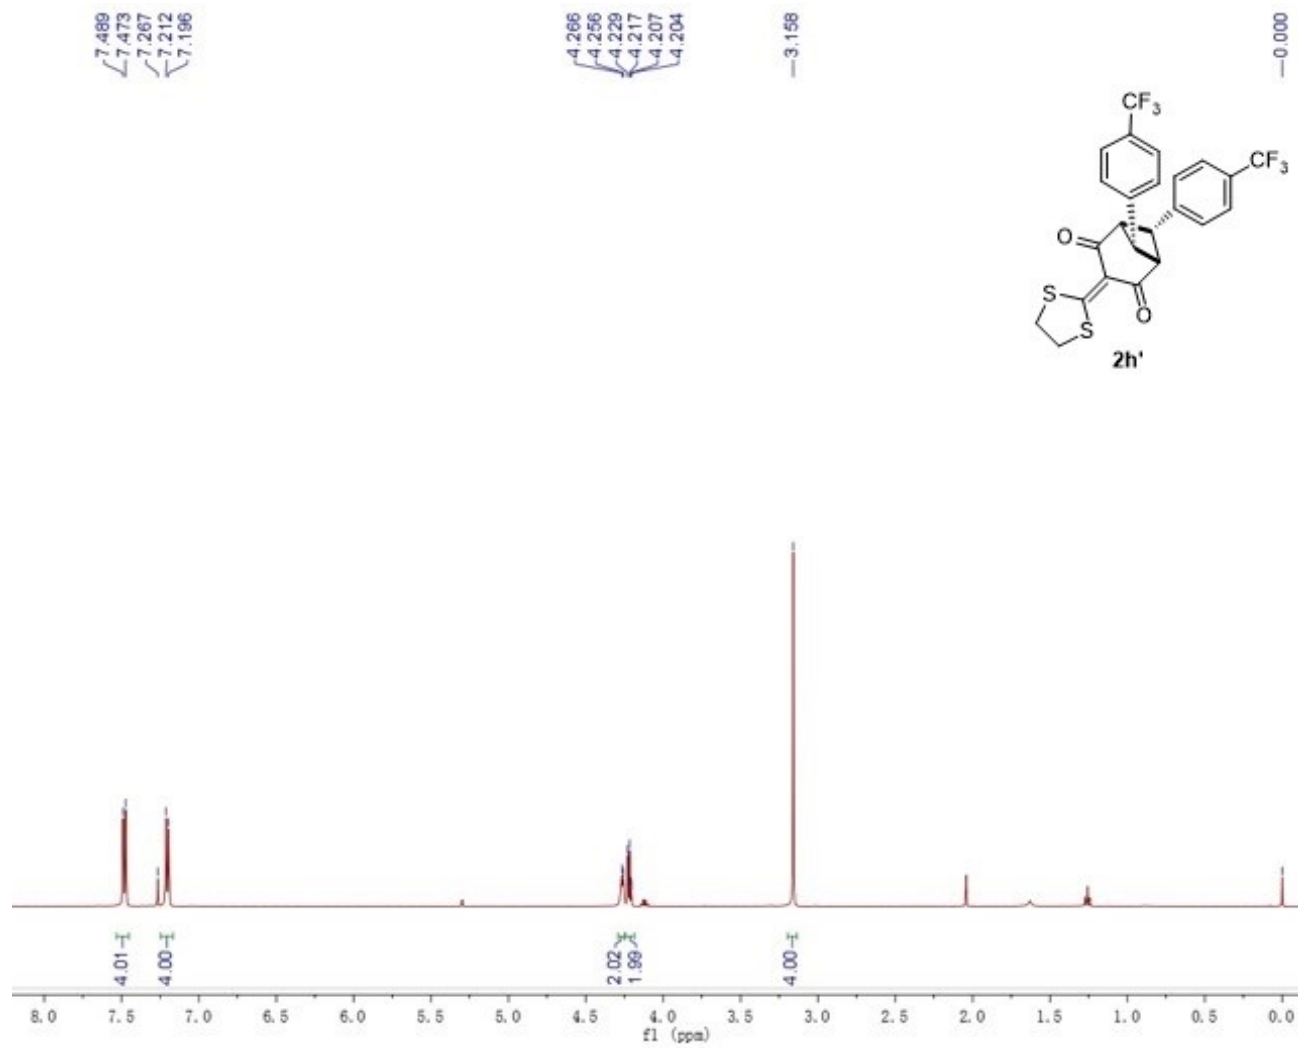

**<sup>13</sup>C spectrum (126 MHz, CDCl<sub>3</sub>) of compound 2h'**

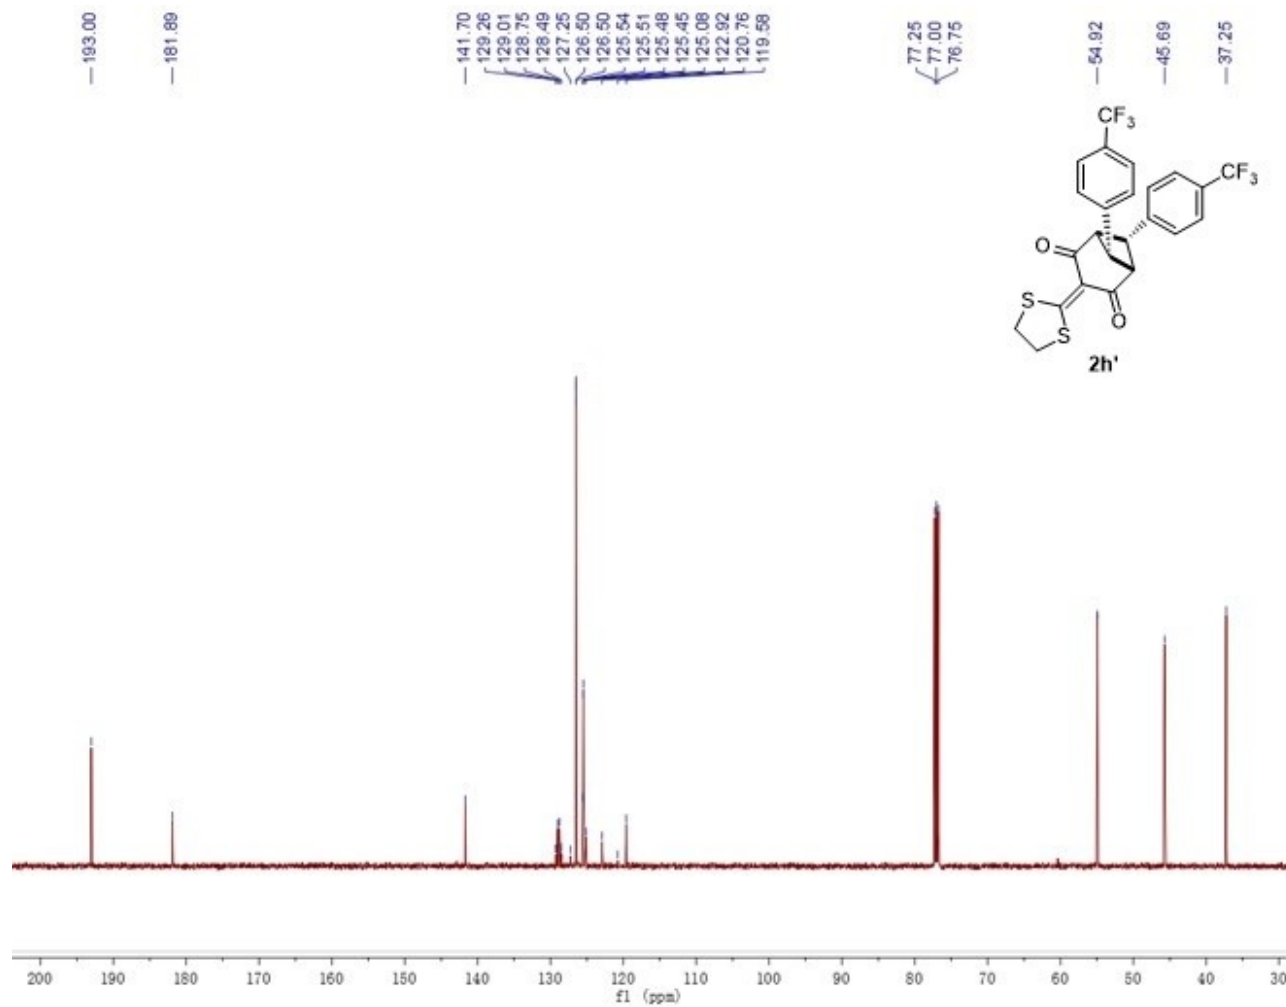

<sup>1</sup>H spectrum (600 MHz, CDCl<sub>3</sub>) of compound 3h

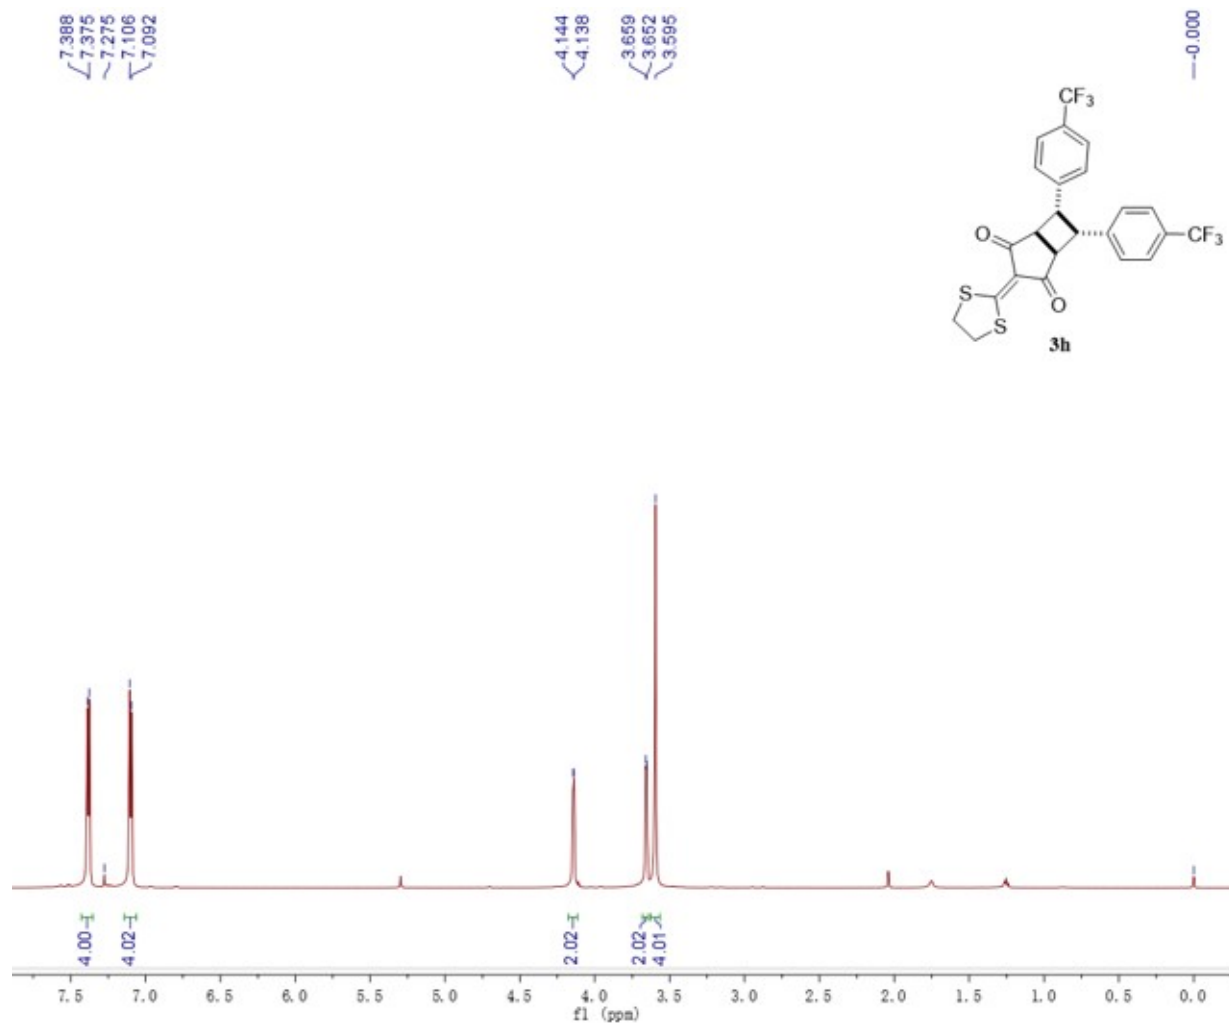

<sup>13</sup>C spectrum (151 MHz, CDCl<sub>3</sub>) of compound 3h

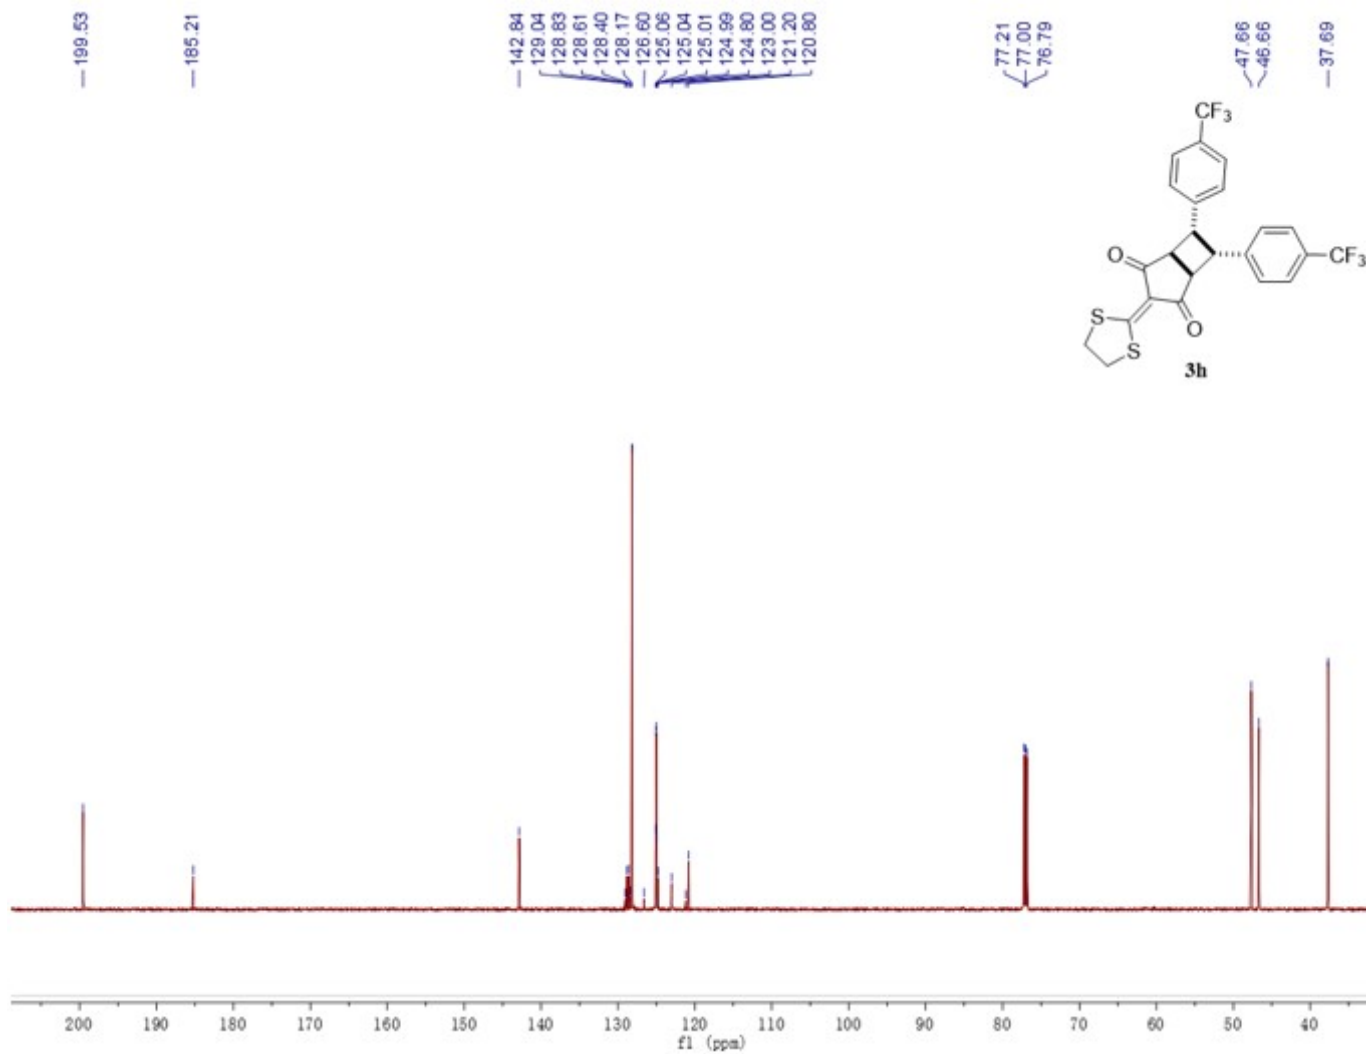

**<sup>1</sup>H spectrum (500 MHz, CDCl<sub>3</sub>) of compound 2i/2i'**

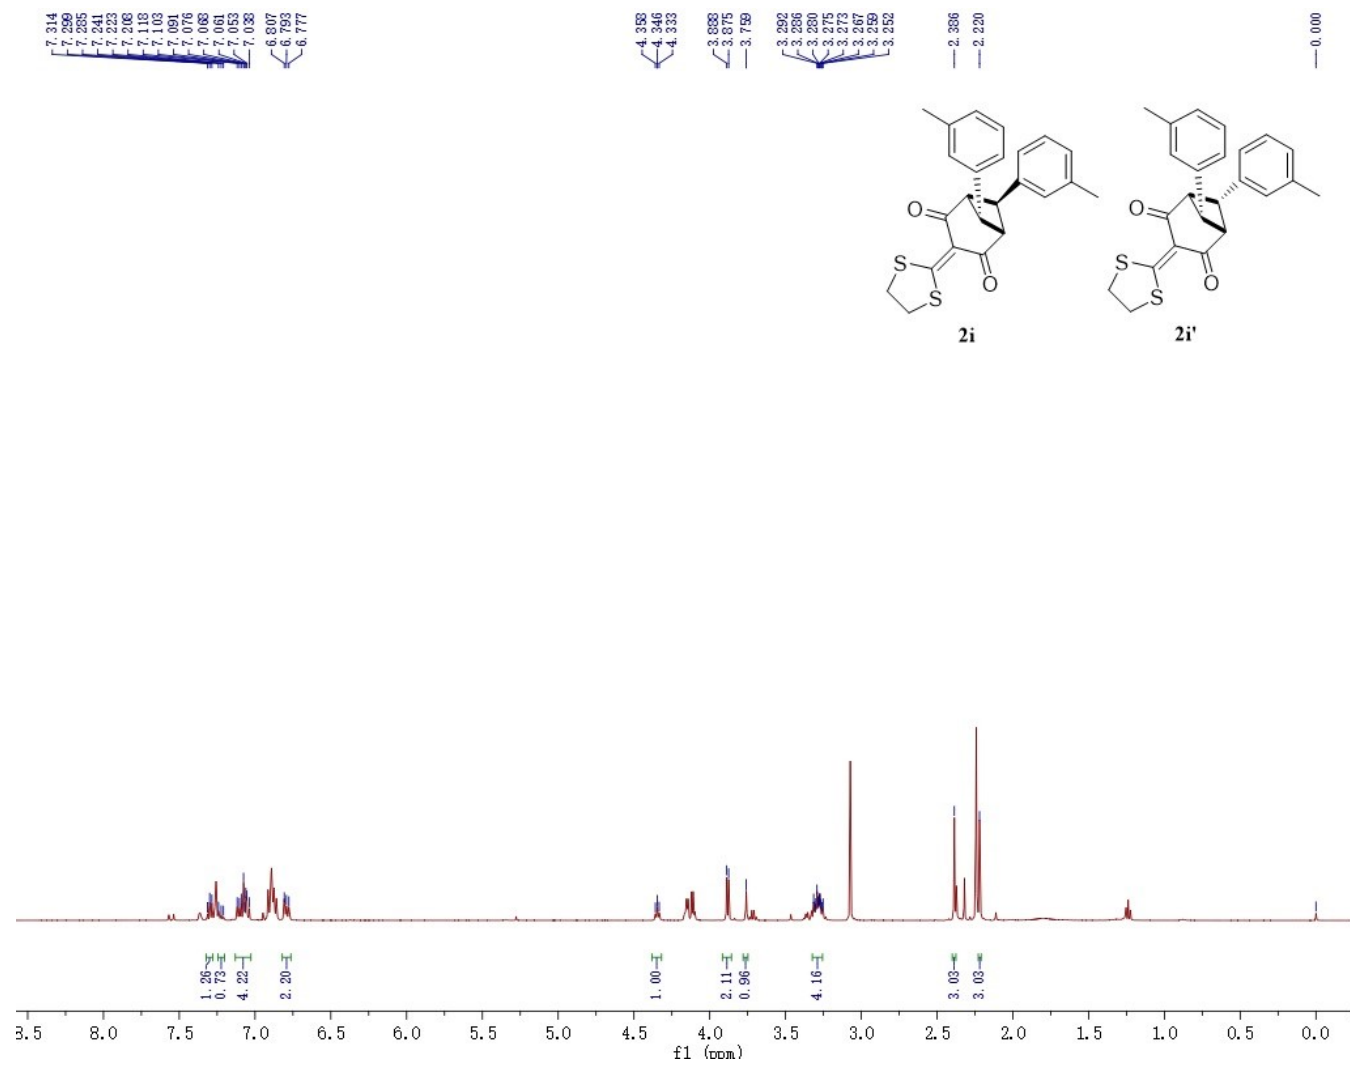

**$^{13}\text{C}$  spectrum (151 MHz,  $\text{CDCl}_3$ ) of compound 2i/2i'**

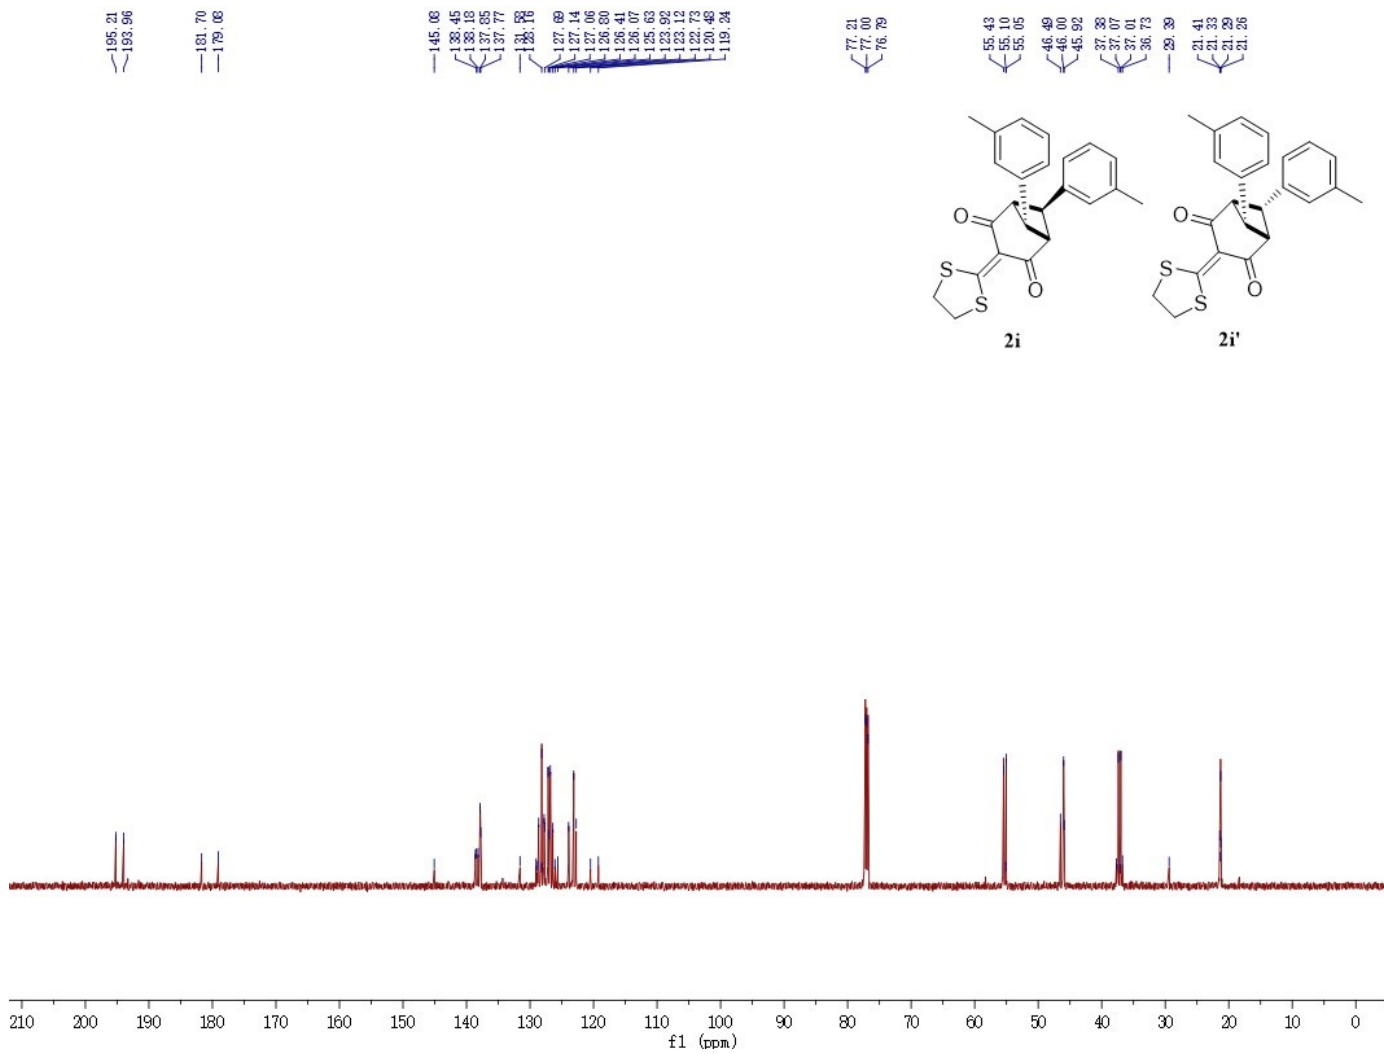



<sup>1</sup>H spectrum (500 MHz, CDCl<sub>3</sub>) of compound 3i

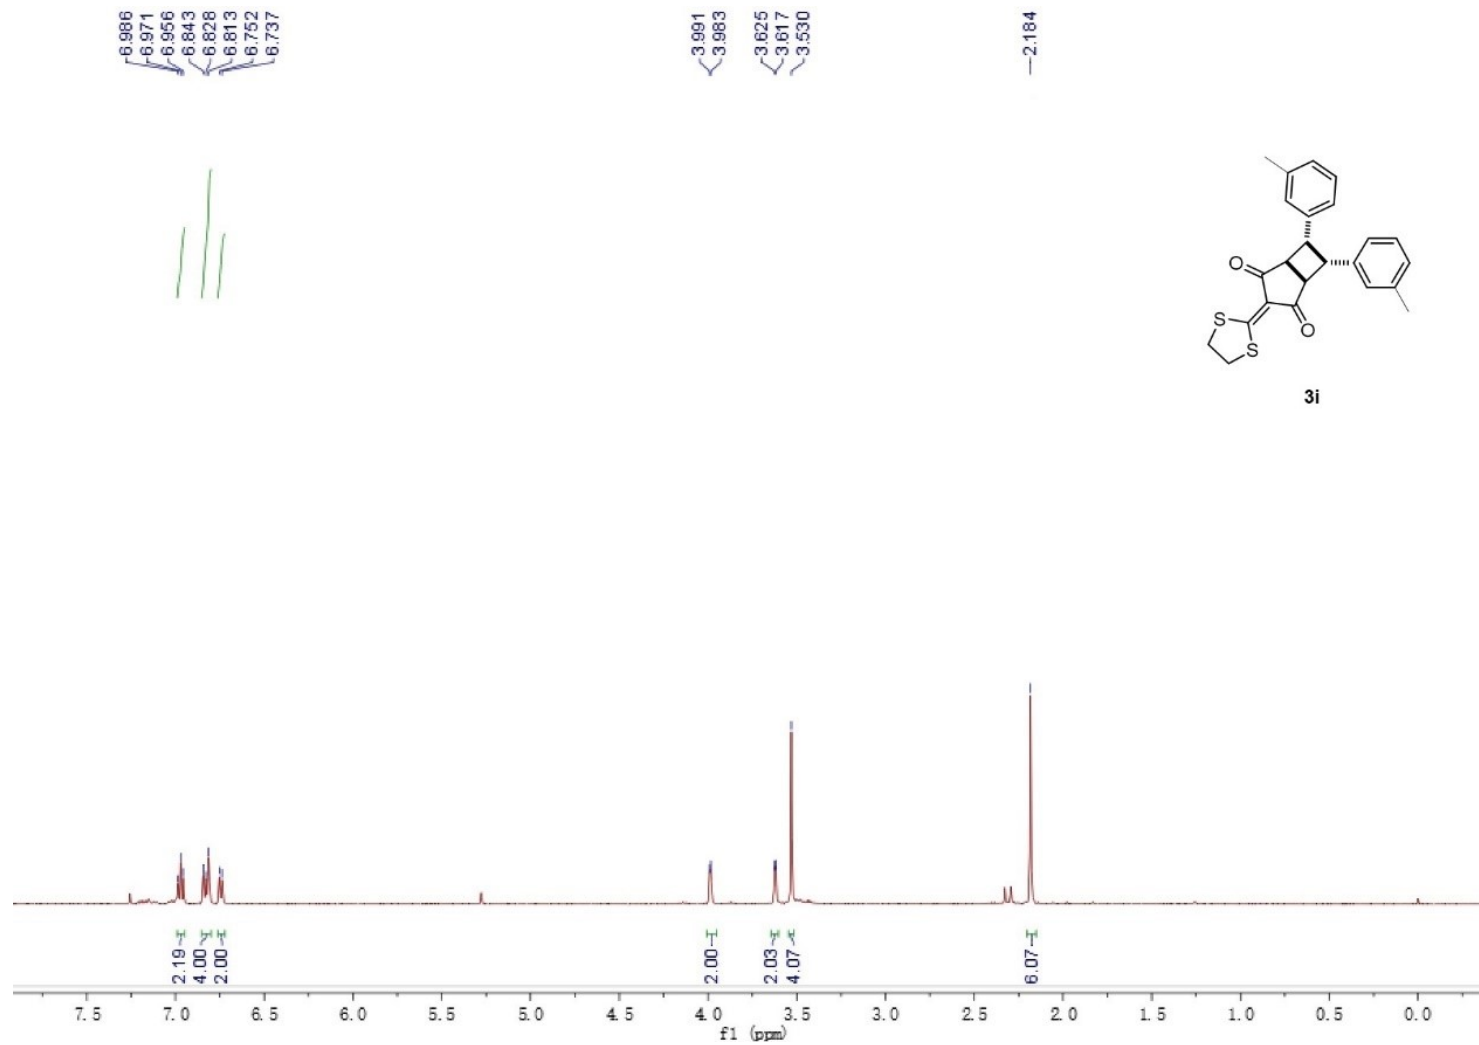

**<sup>13</sup>C spectrum (151 MHz, CDCl<sub>3</sub>) of compound 3i**

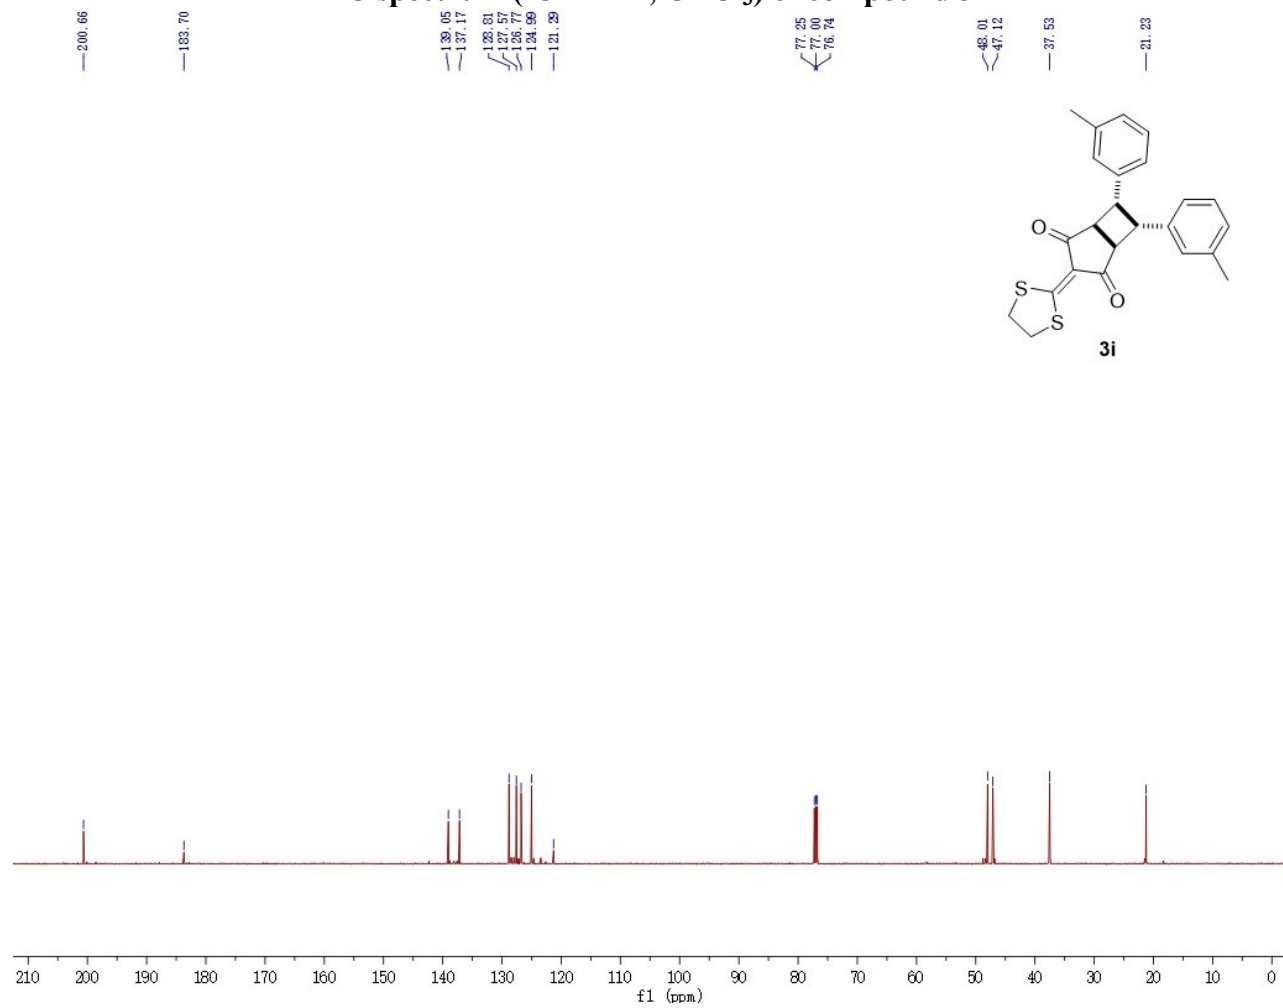

<sup>1</sup>H spectrum (500 MHz, CDCl<sub>3</sub>) of compound 2j/2j'

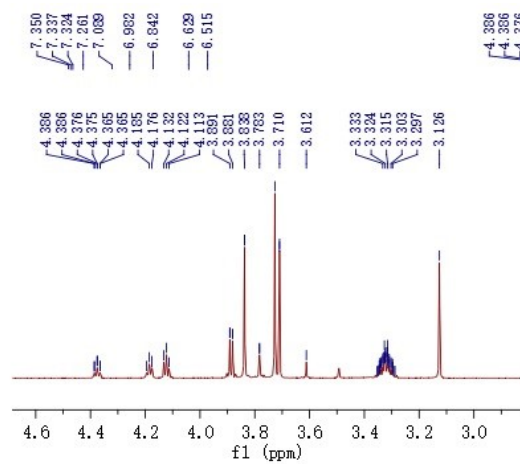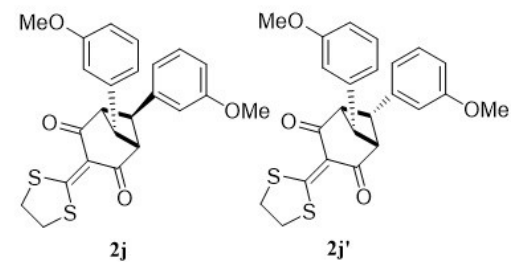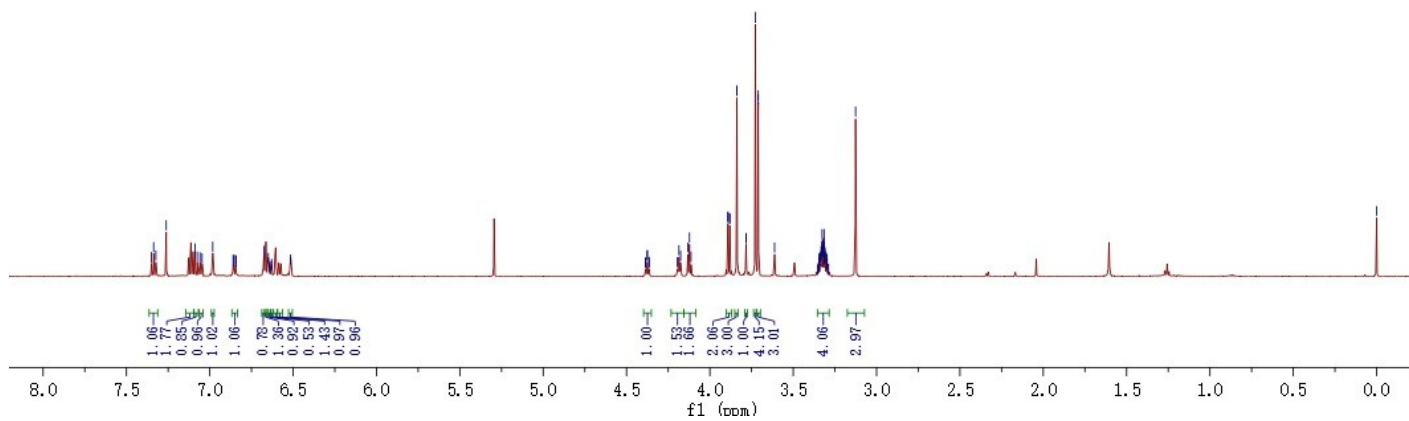

**<sup>13</sup>C spectrum (151 MHz, CDCl<sub>3</sub>) of compound 2j/2j'**

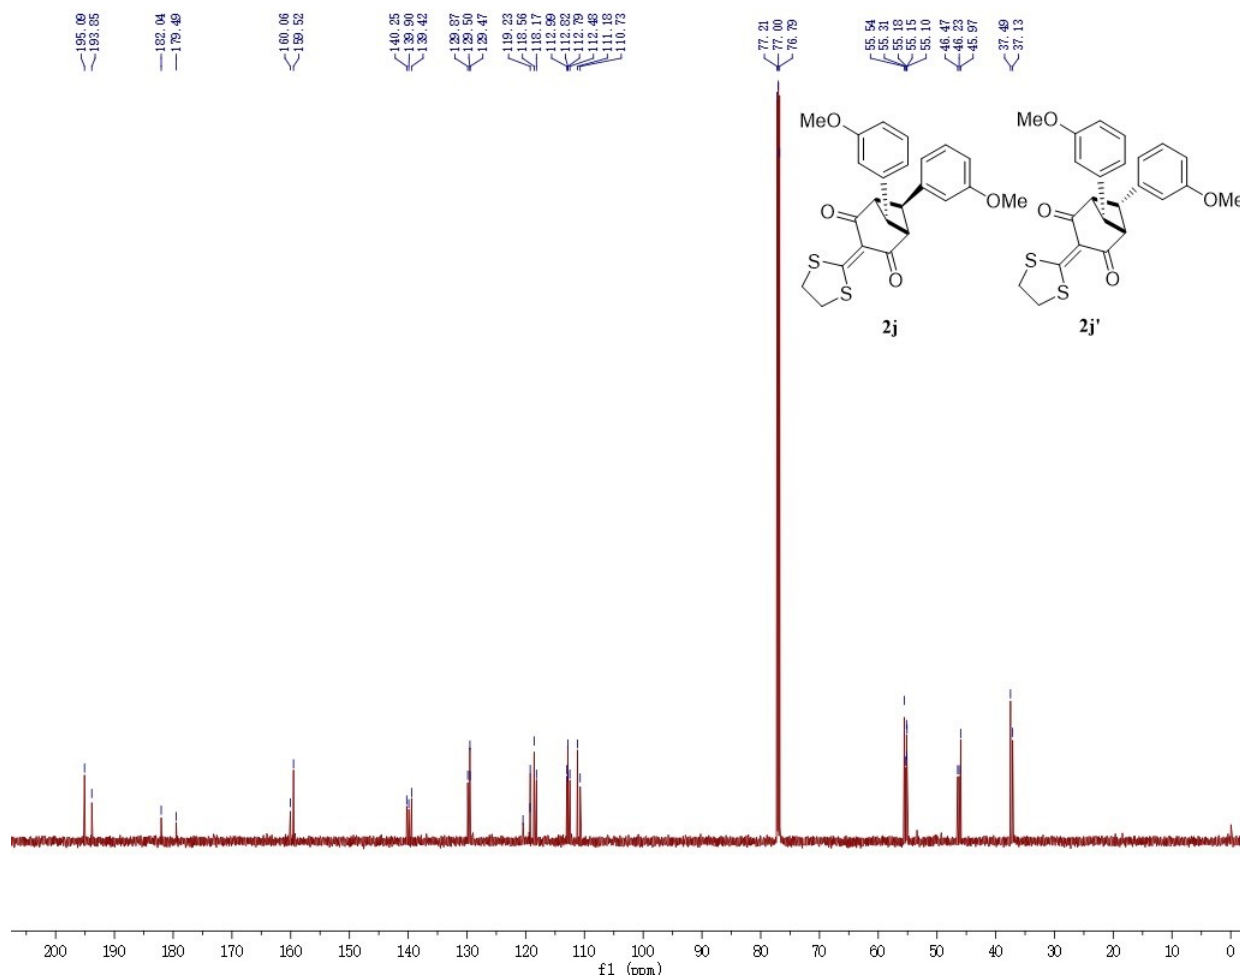

<sup>1</sup>H spectrum (600 MHz, CDCl<sub>3</sub>) of compound 3j

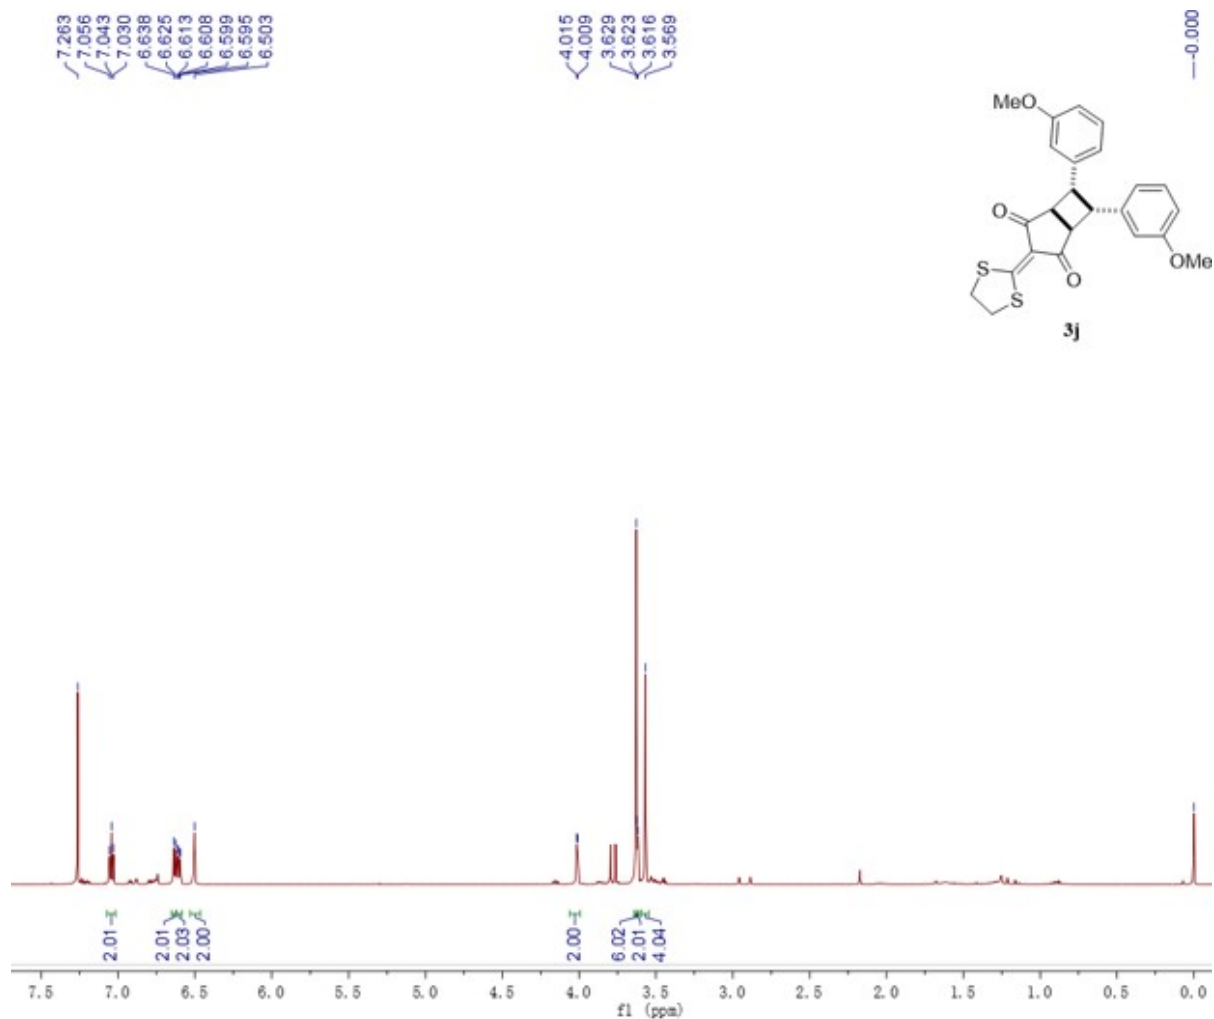

<sup>13</sup>C spectrum (151 MHz, CDCl<sub>3</sub>) of compound 3j

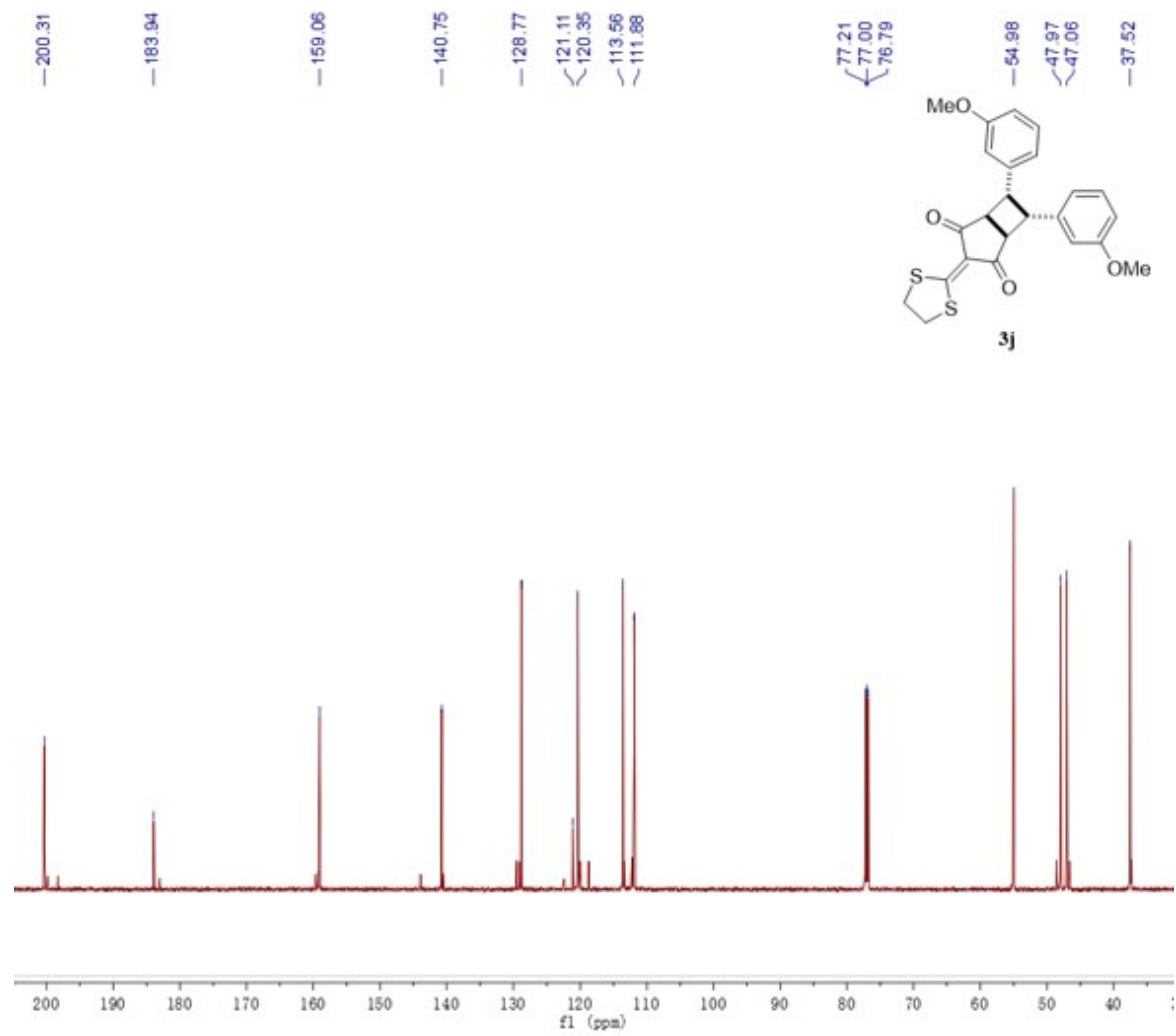

<sup>1</sup>H spectrum (500 MHz, CDCl<sub>3</sub>) of compound 2k

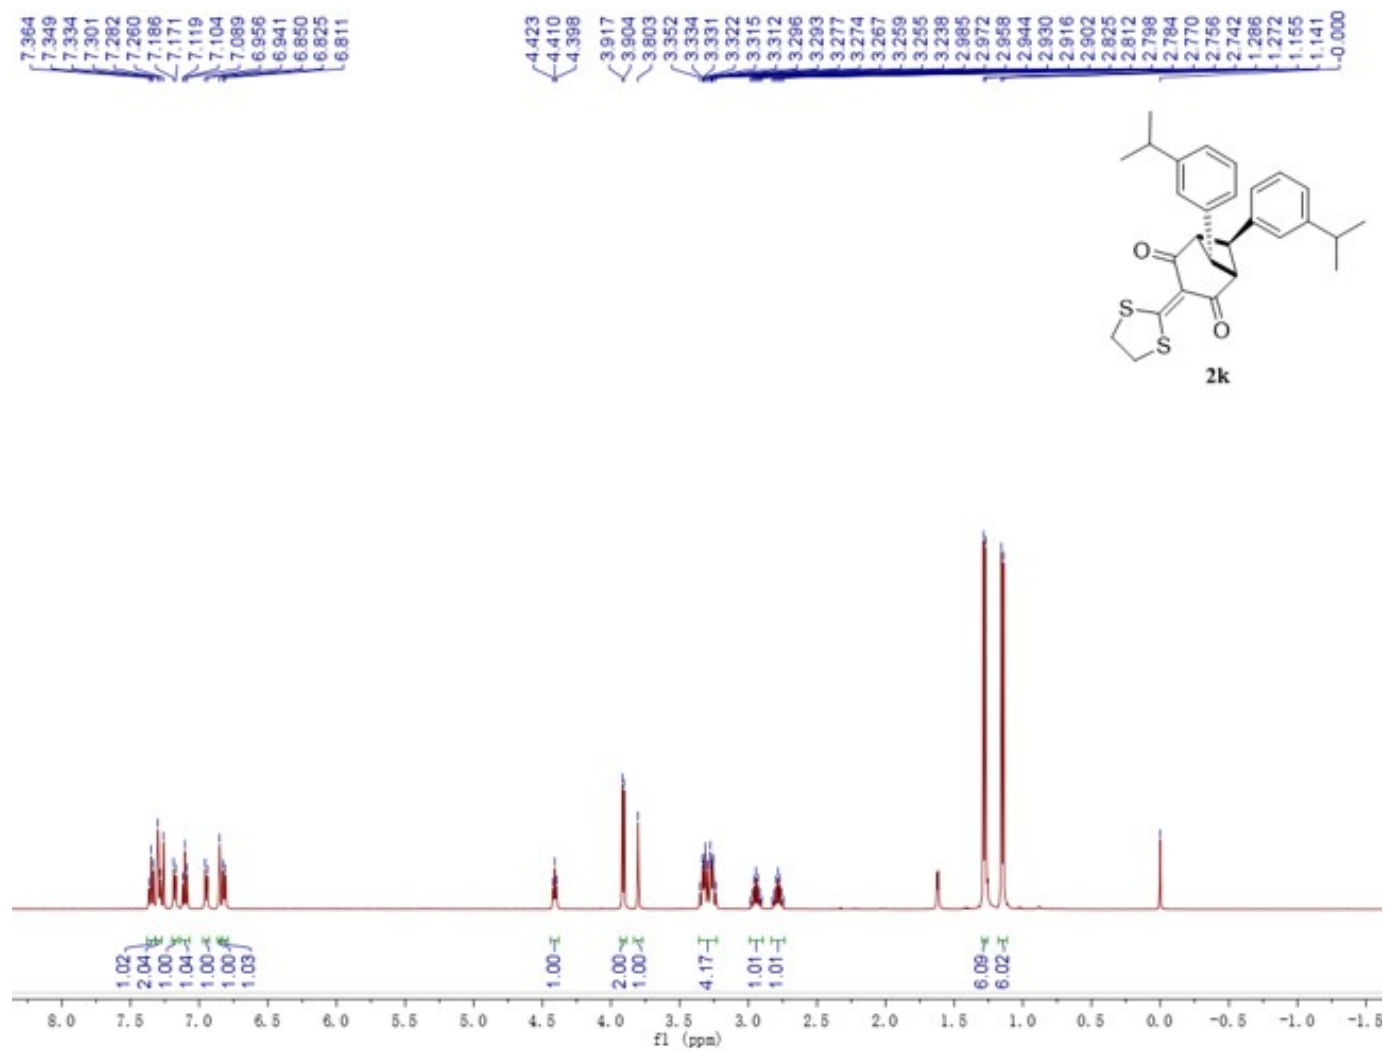

7.364  
7.349  
7.334  
7.301  
7.282  
7.260  
7.186  
7.171  
7.119  
7.104  
7.089  
6.956  
6.941  
6.850  
6.825  
6.811

4.423  
4.410  
4.398  
3.917  
3.904  
3.803  
3.352  
3.334  
3.331  
3.322  
3.315  
3.312  
3.296  
3.293  
3.277  
3.274  
3.267  
3.259  
3.255  
3.238  
2.985  
2.972  
2.958  
2.944  
2.930  
2.916  
2.902  
2.825  
2.812  
2.798  
2.784  
2.770  
2.756  
2.742  
1.286  
1.272  
1.155  
1.141  
-0.000

1.02  
2.04  
1.00  
1.04  
1.00  
1.03

1.00

2.00  
1.00

4.17

1.01  
1.01

6.09  
6.02

f1 (ppm)

<sup>13</sup>C spectrum (151 MHz, CDCl<sub>3</sub>) of compound 2k

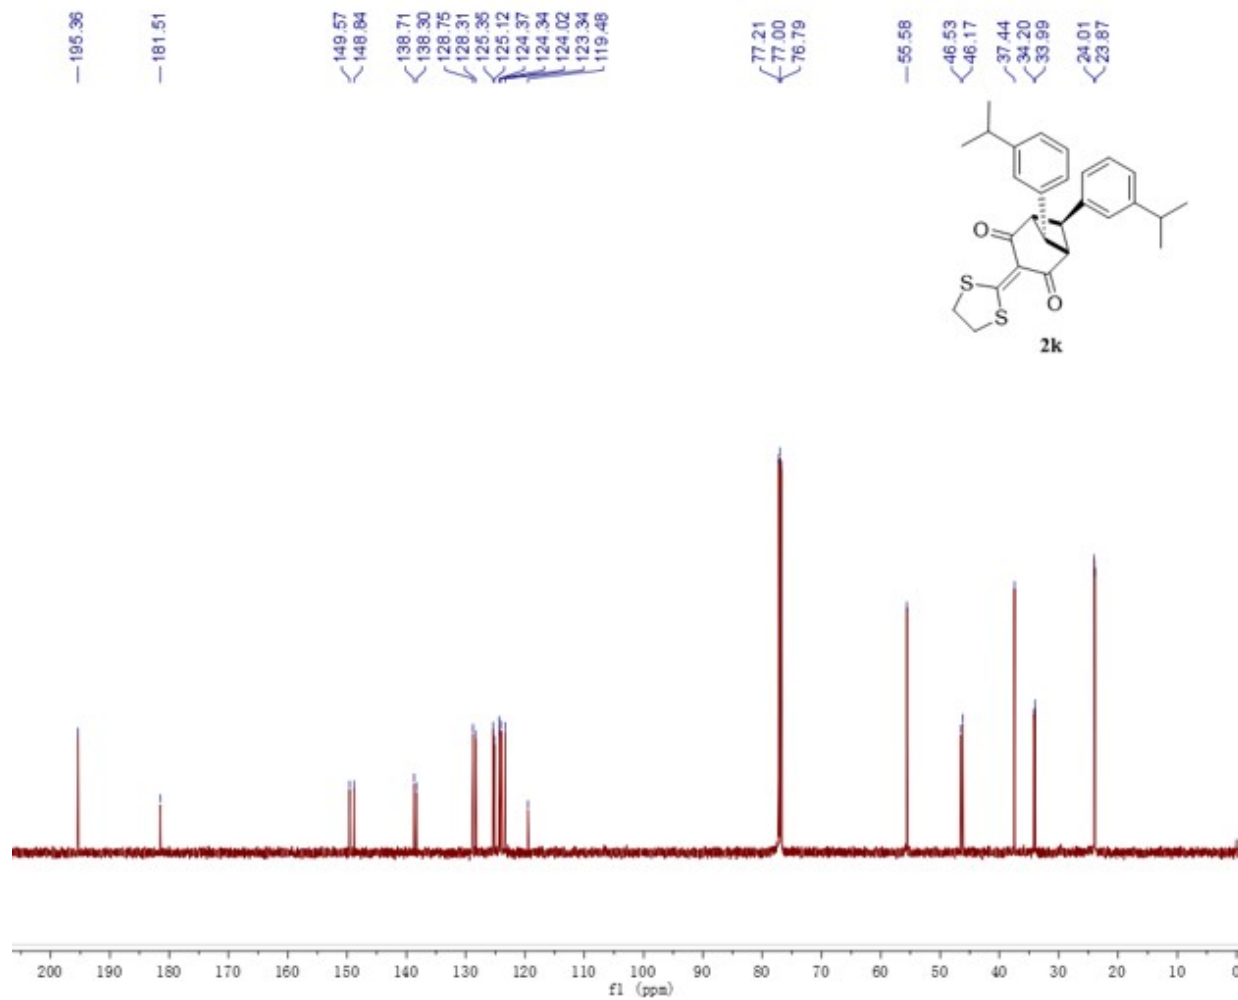



**<sup>1</sup>H spectrum (500 MHz, CDCl<sub>3</sub>) of compound 2k'**

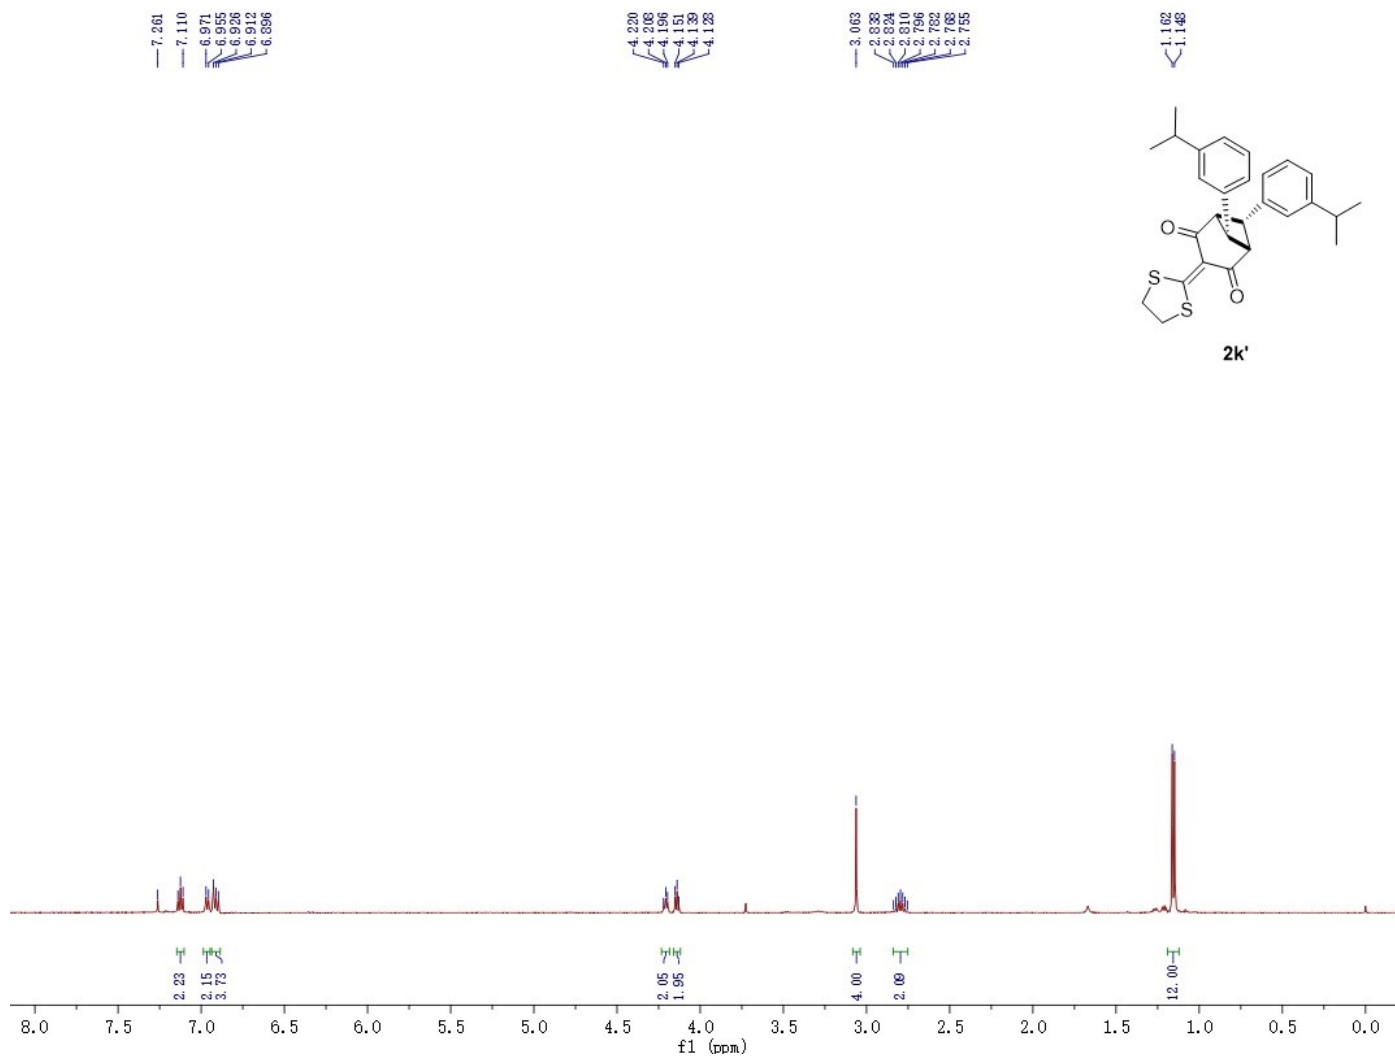

**<sup>13</sup>C spectrum (151 MHz, CDCl<sub>3</sub>) of compound 2k'**

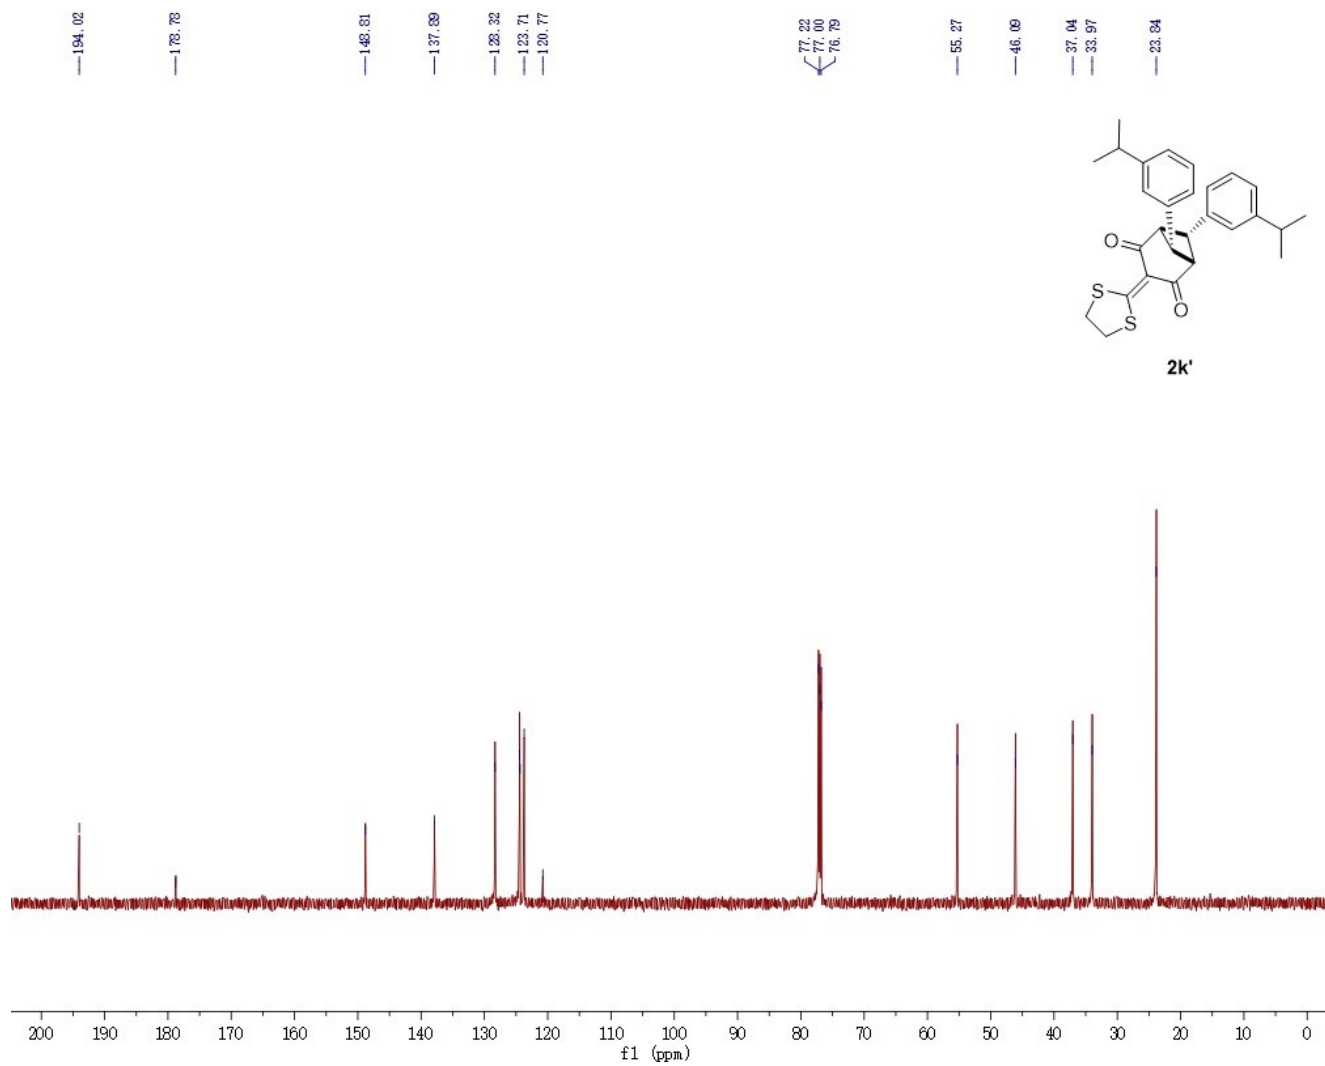

<sup>1</sup>H spectrum (600 MHz, CDCl<sub>3</sub>) of compound 3k

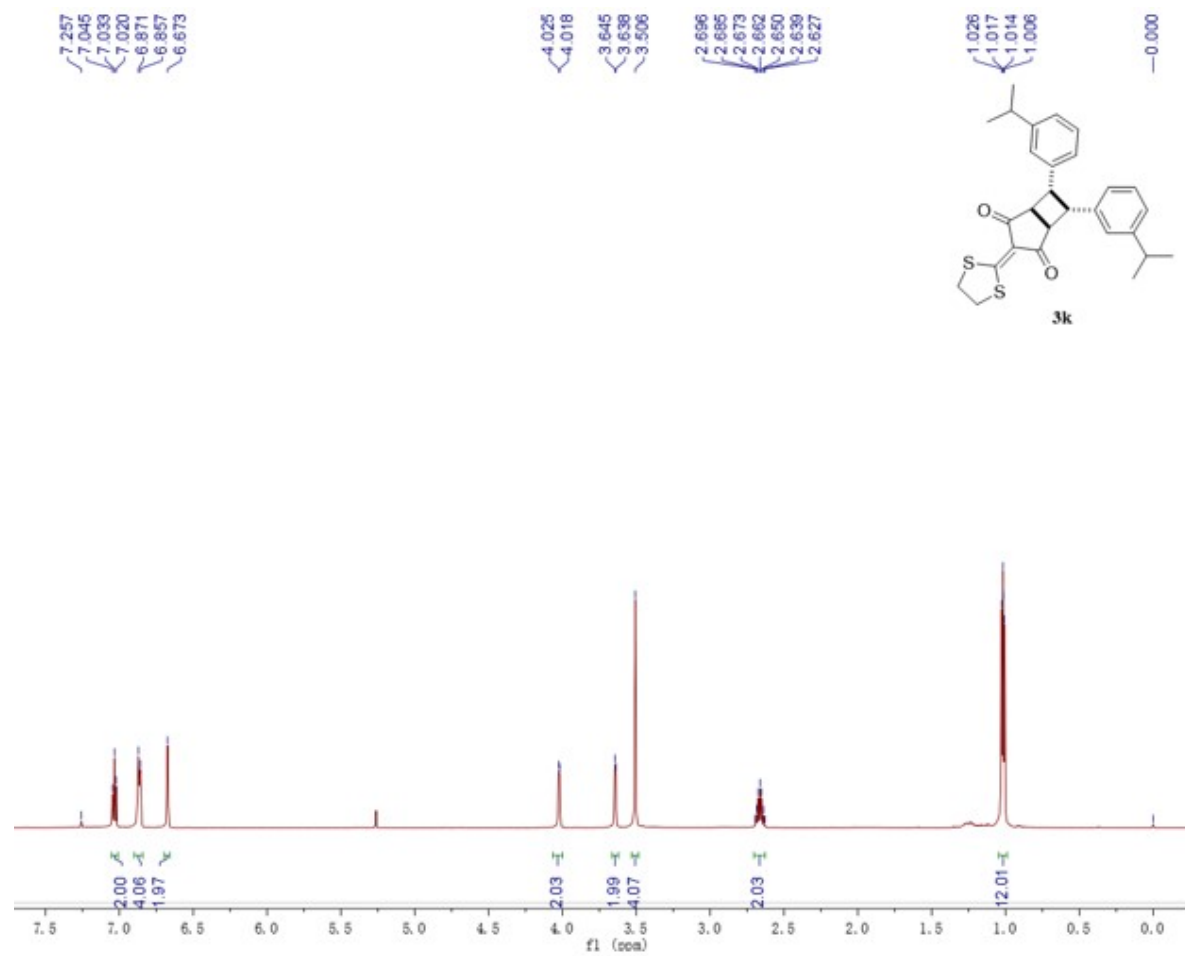

<sup>13</sup>C spectrum (151 MHz, CDCl<sub>3</sub>) of compound 3k

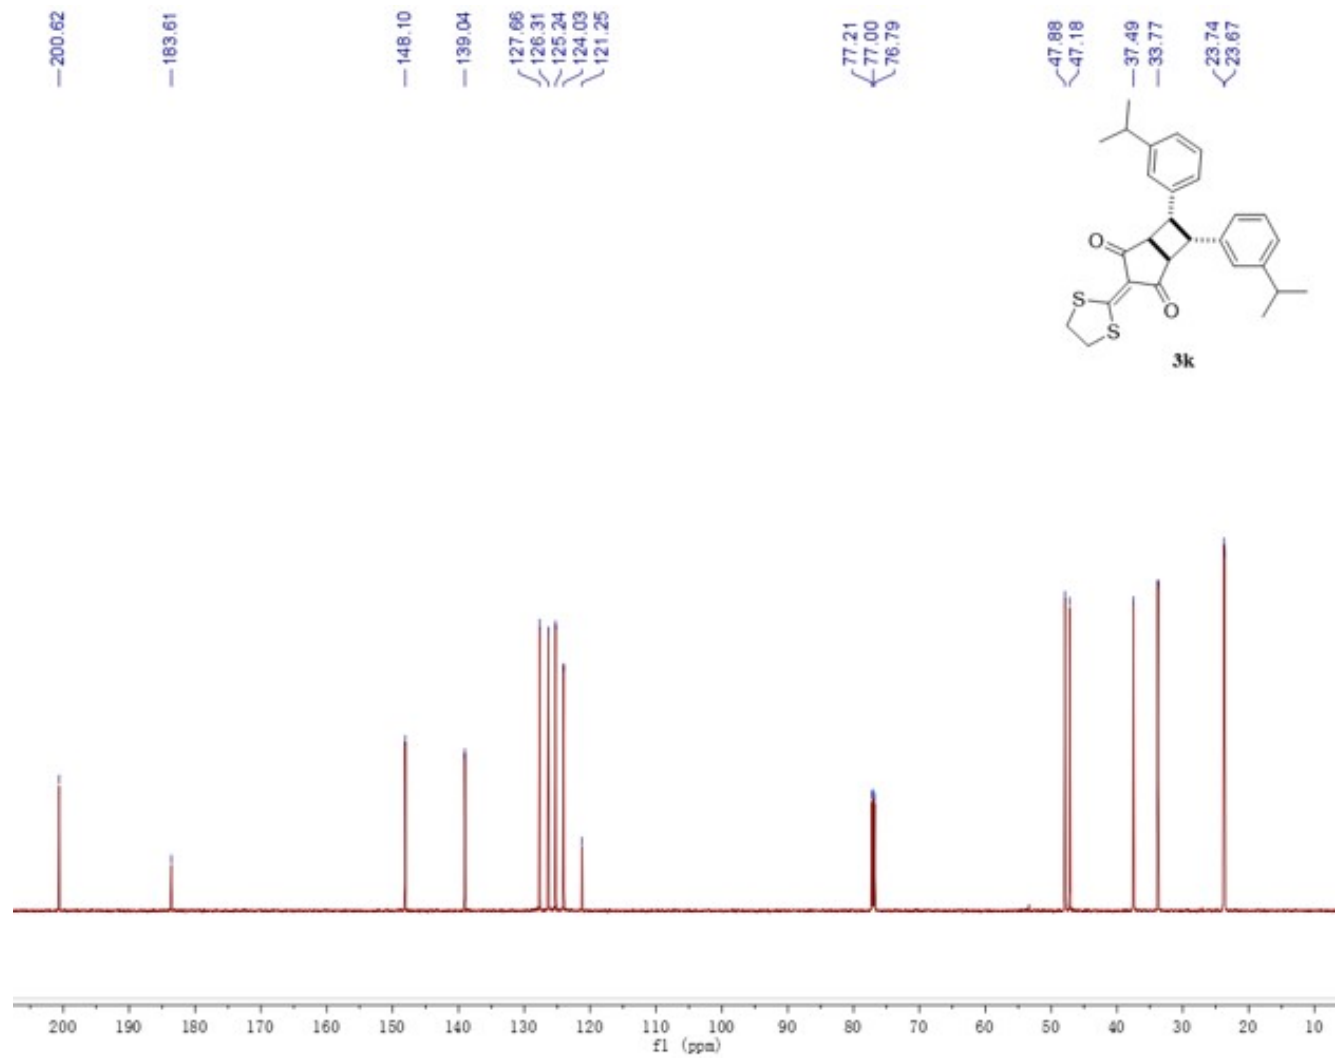

<sup>1</sup>H spectrum (500 MHz, CDCl<sub>3</sub>) of compound 21

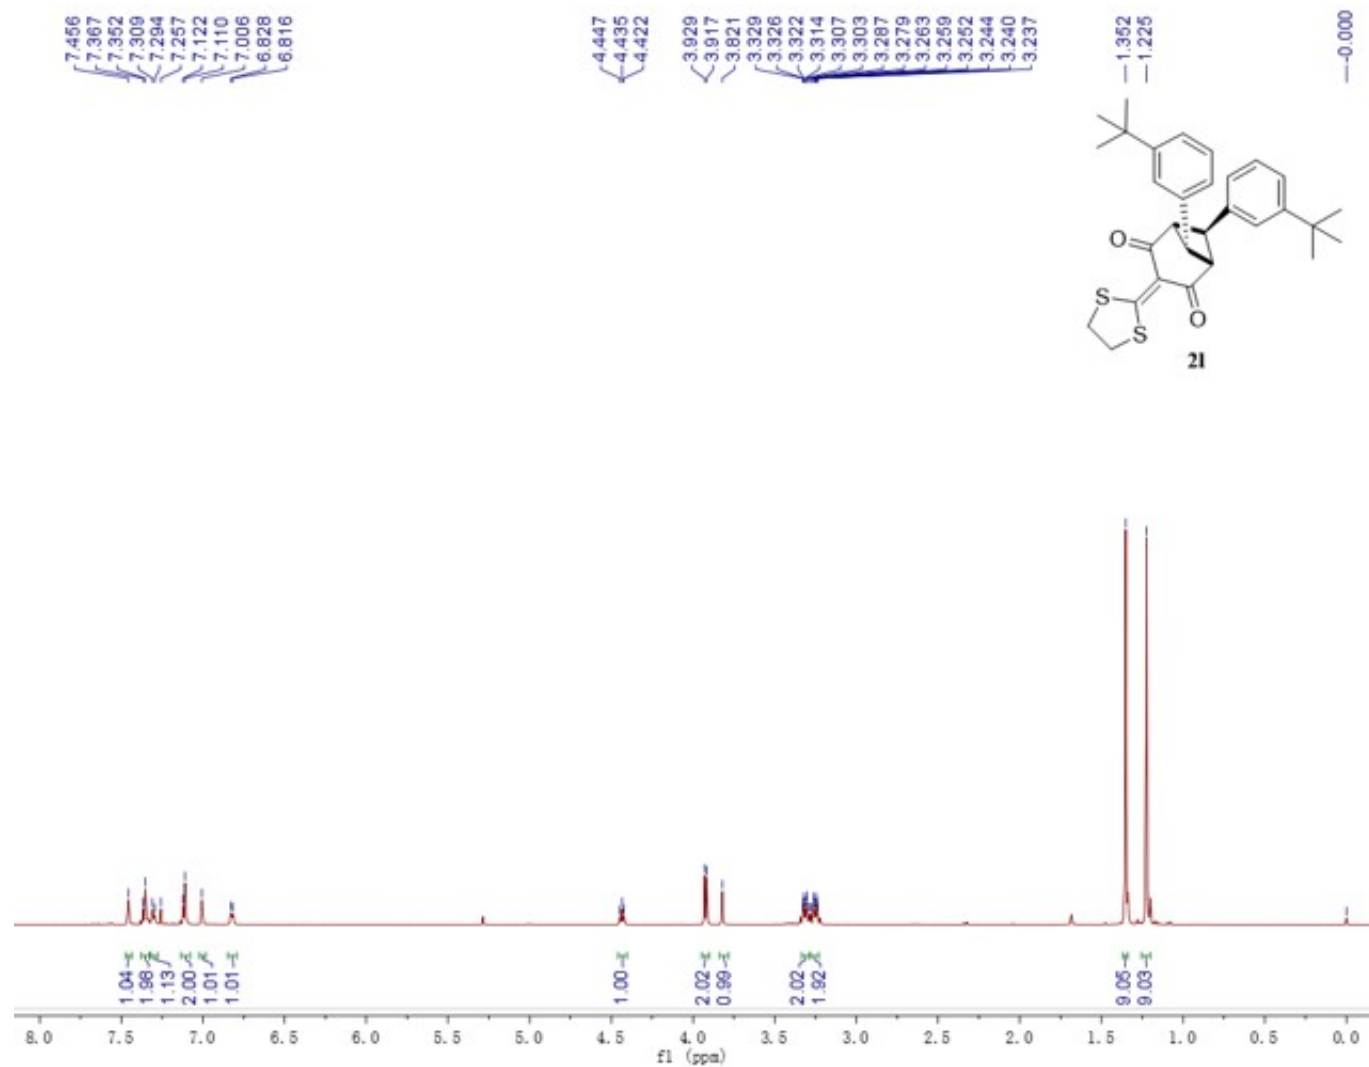

<sup>13</sup>C spectrum (151 MHz, CDCl<sub>3</sub>) of compound 21

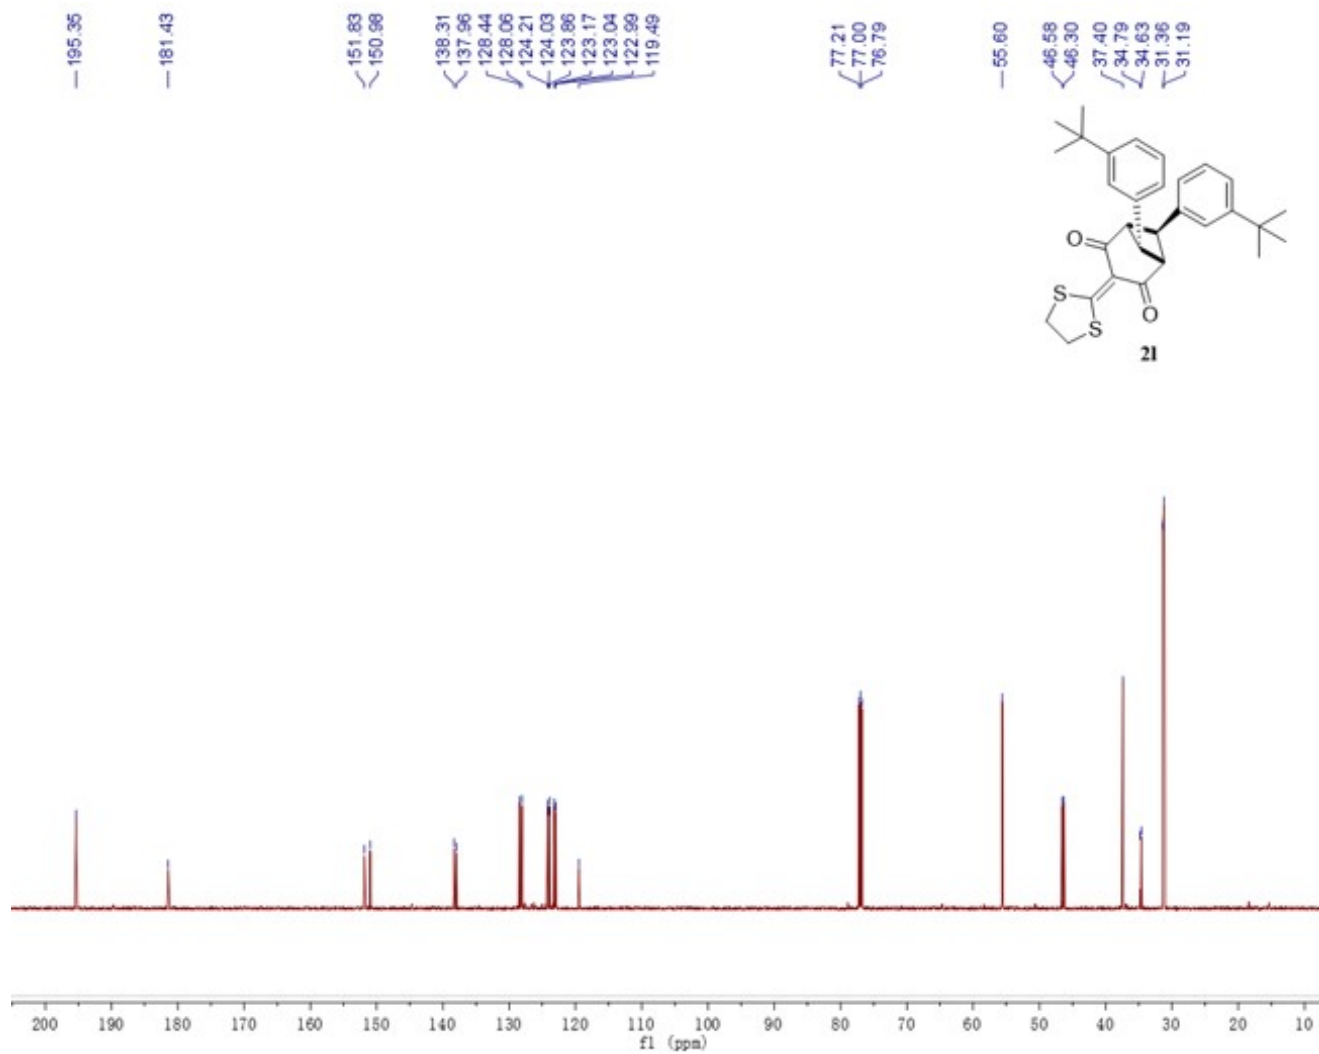

<sup>1</sup>H spectrum (500 MHz, CDCl<sub>3</sub>) of compound 21'

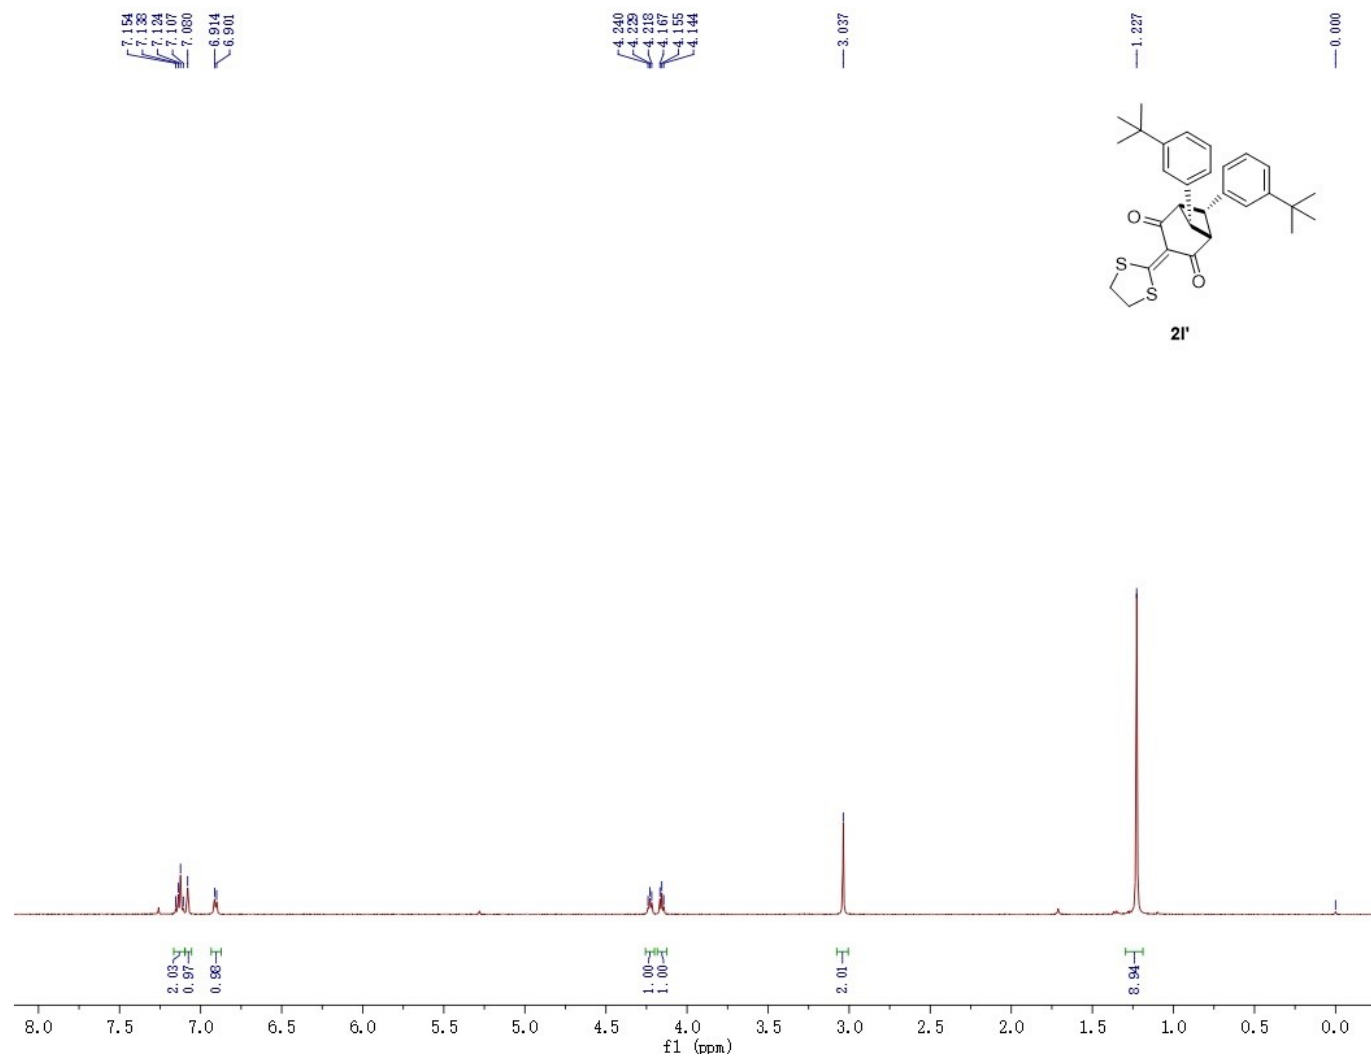

**<sup>13</sup>C spectrum (151 MHz, CDCl<sub>3</sub>) of compound 21'**

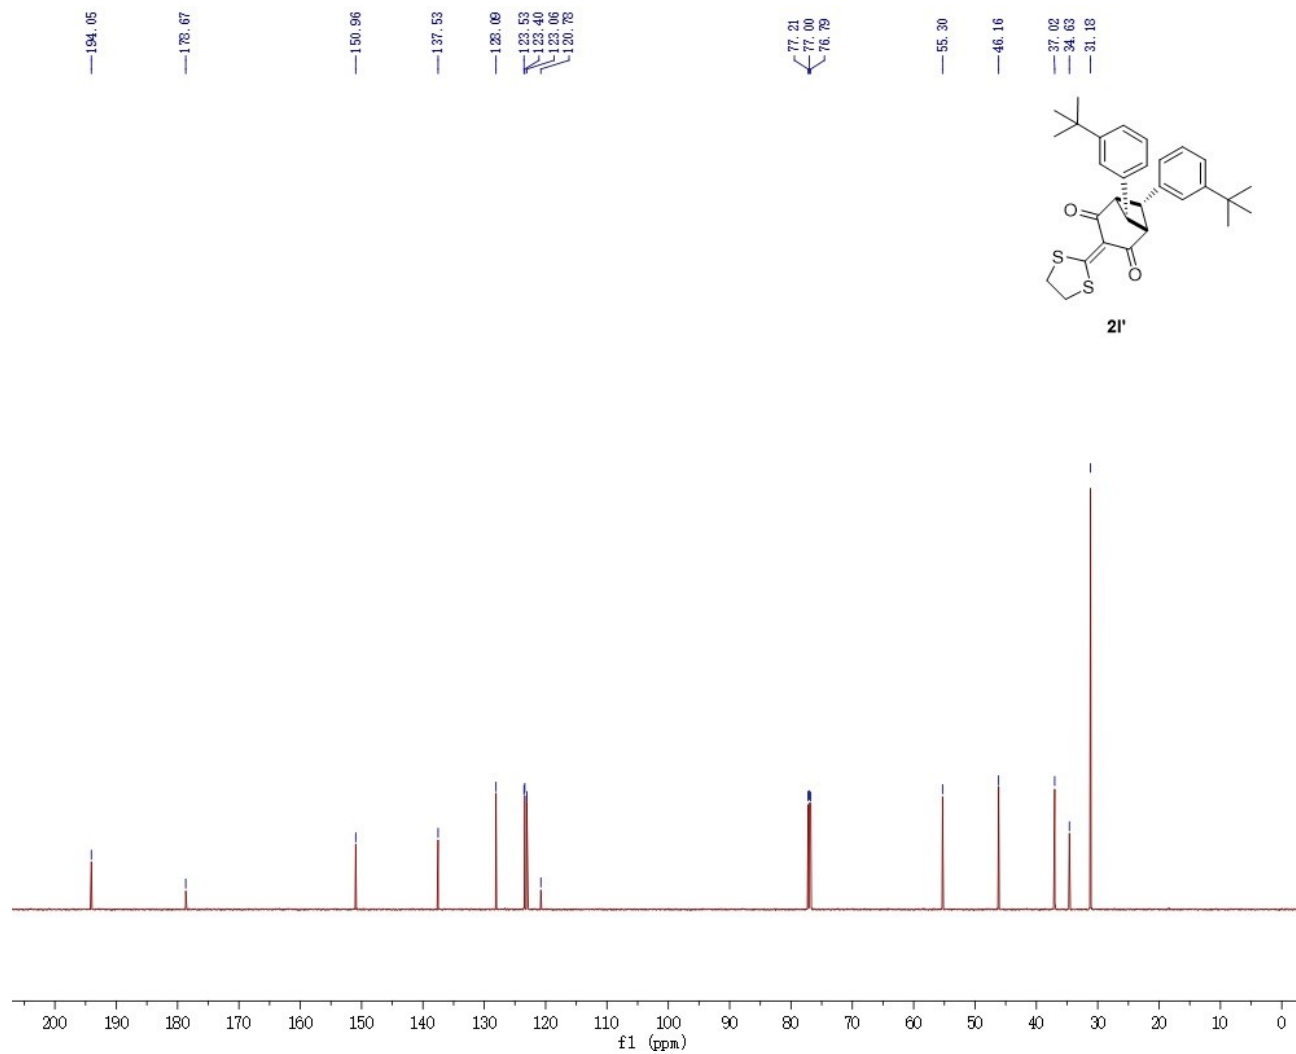



<sup>1</sup>H spectrum (500 MHz, CDCl<sub>3</sub>) of compound 31

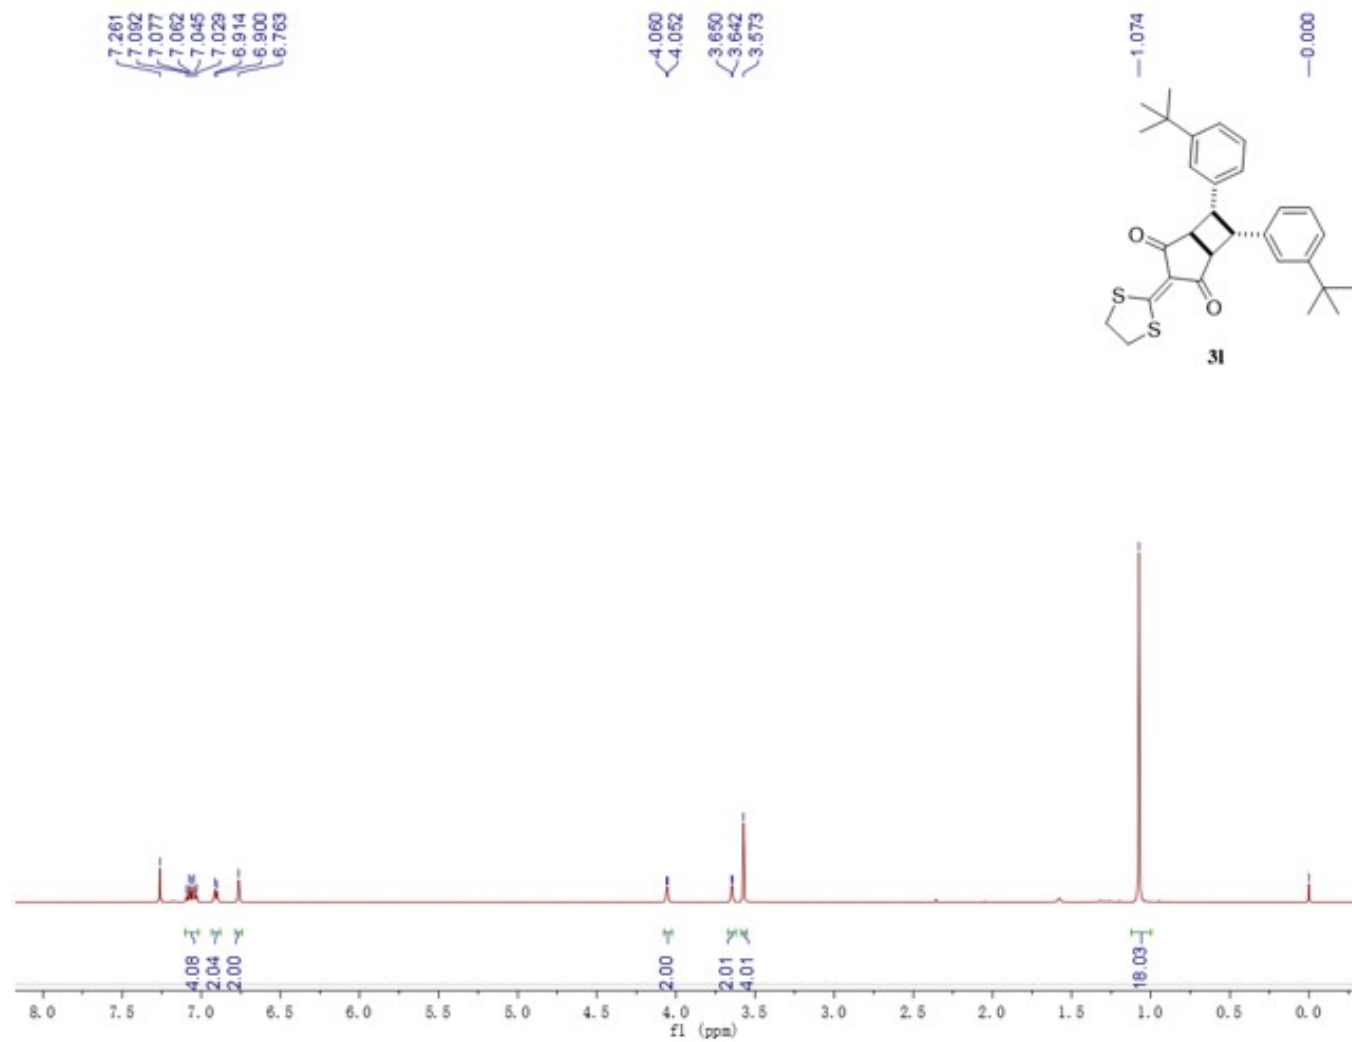

<sup>13</sup>C spectrum (151 MHz, CDCl<sub>3</sub>) of compound 31

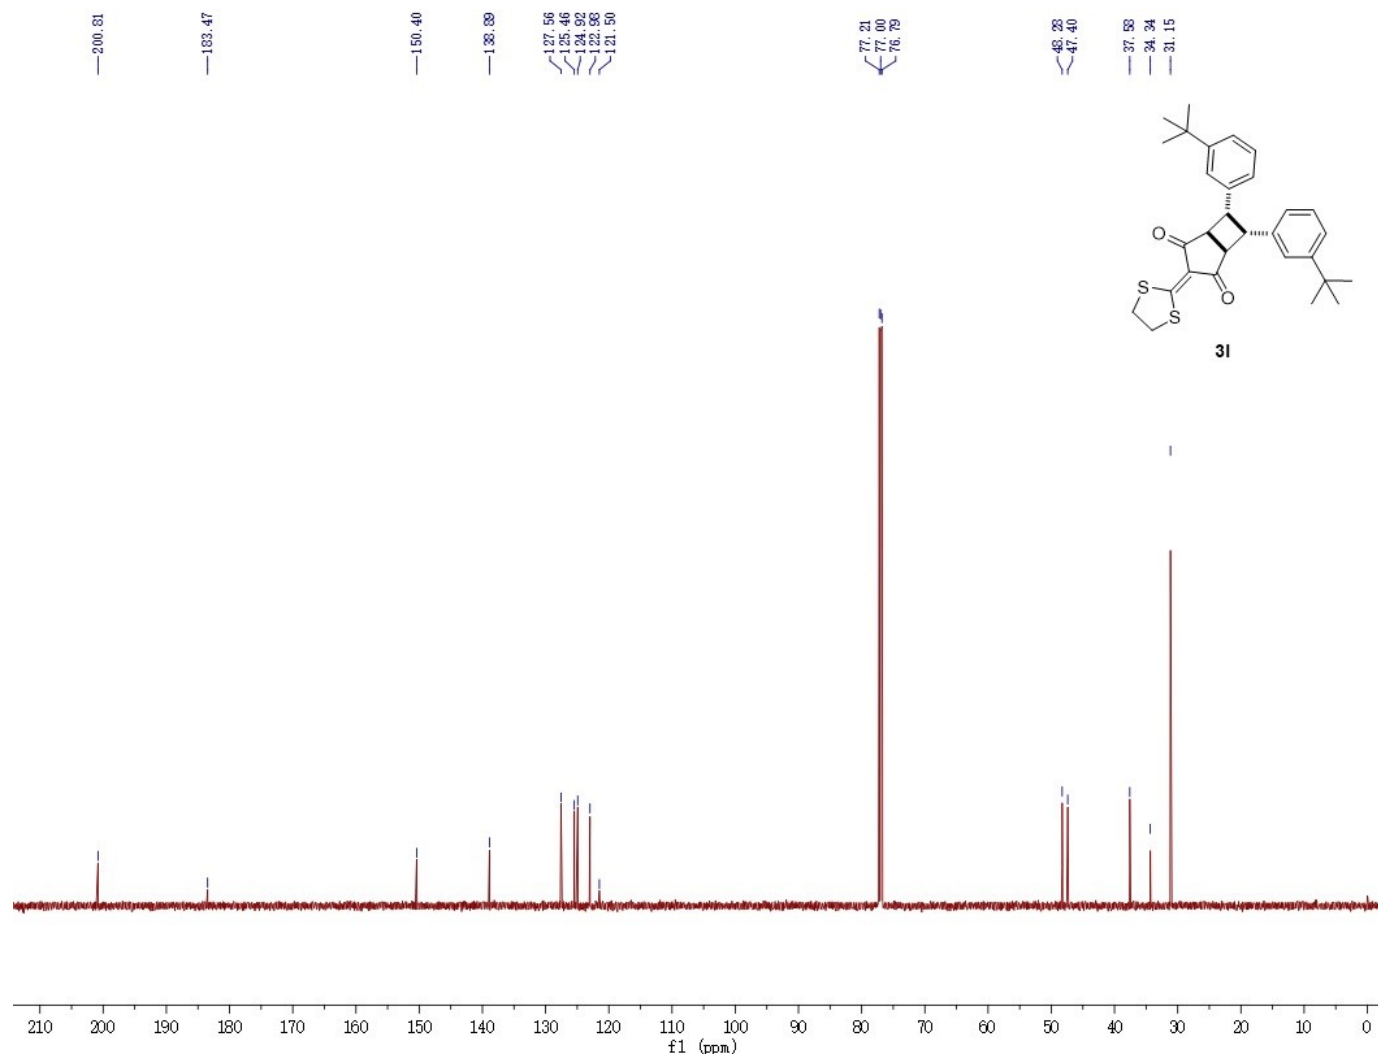

**<sup>1</sup>H spectrum (500 MHz, CDCl<sub>3</sub>) of compound 2m/2m'**

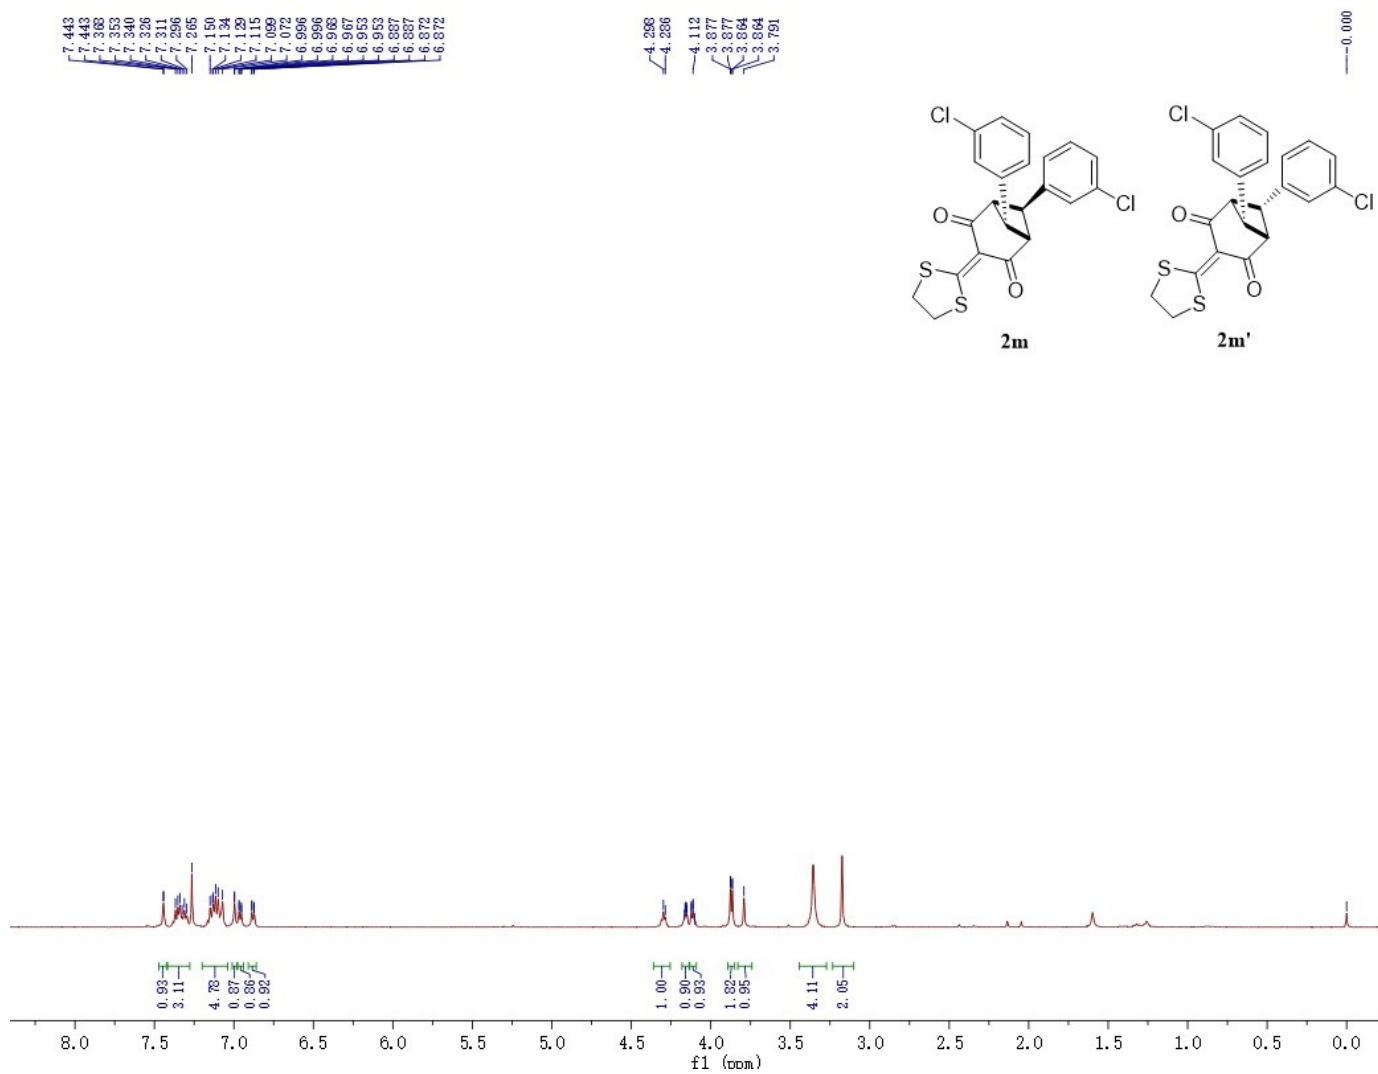

**<sup>13</sup>C spectrum (151 MHz, CDCl<sub>3</sub>) of compound 2m/2m'**

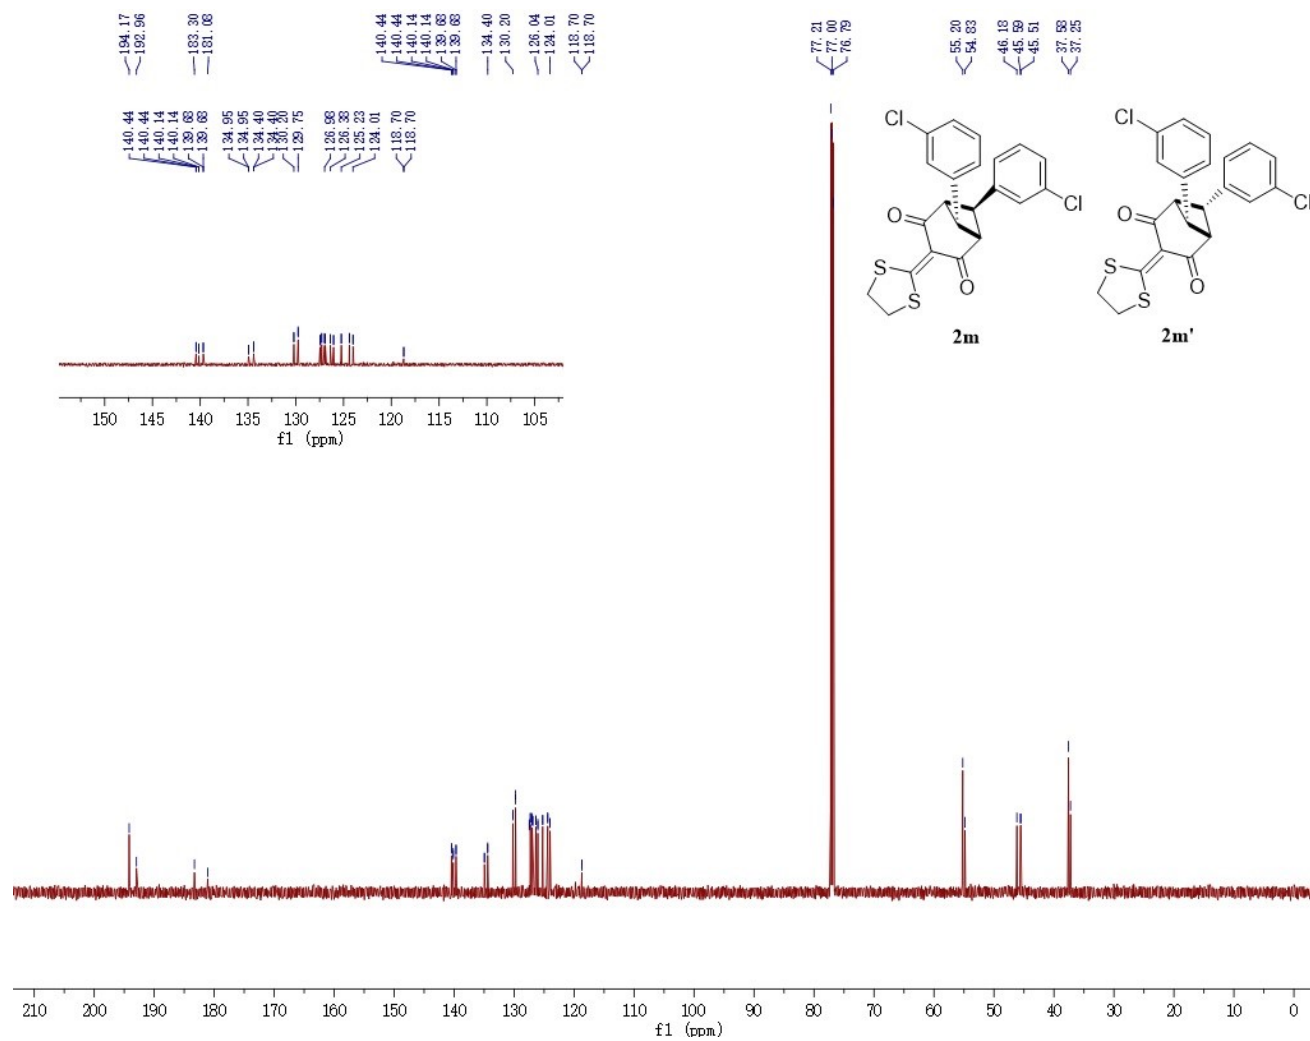

<sup>1</sup>H spectrum (500 MHz, CDCl<sub>3</sub>) of compound 3m

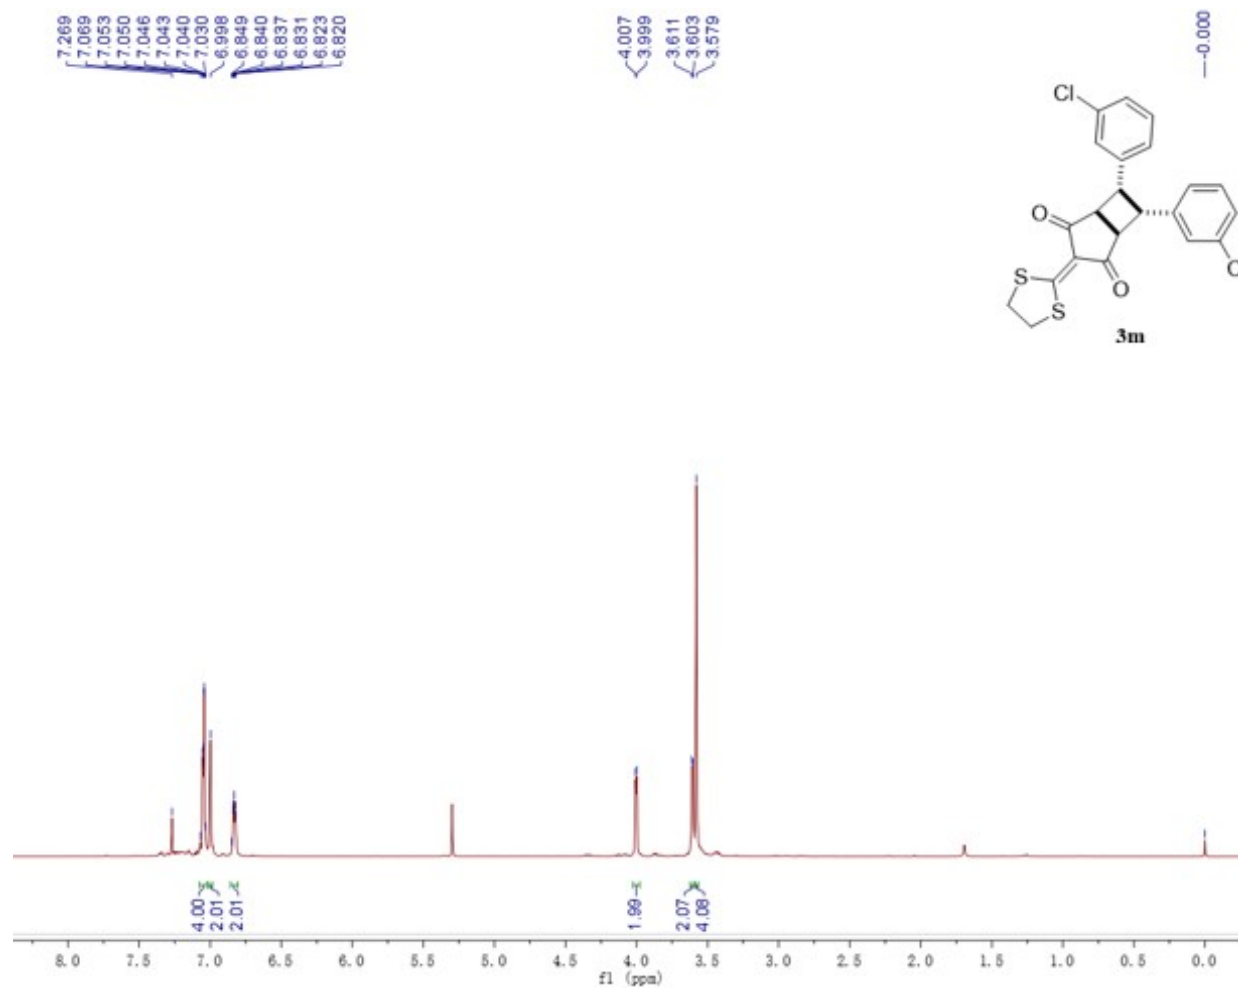

**$^{13}\text{C}$  spectrum (151 MHz,  $\text{CDCl}_3$ ) of compound 3m**

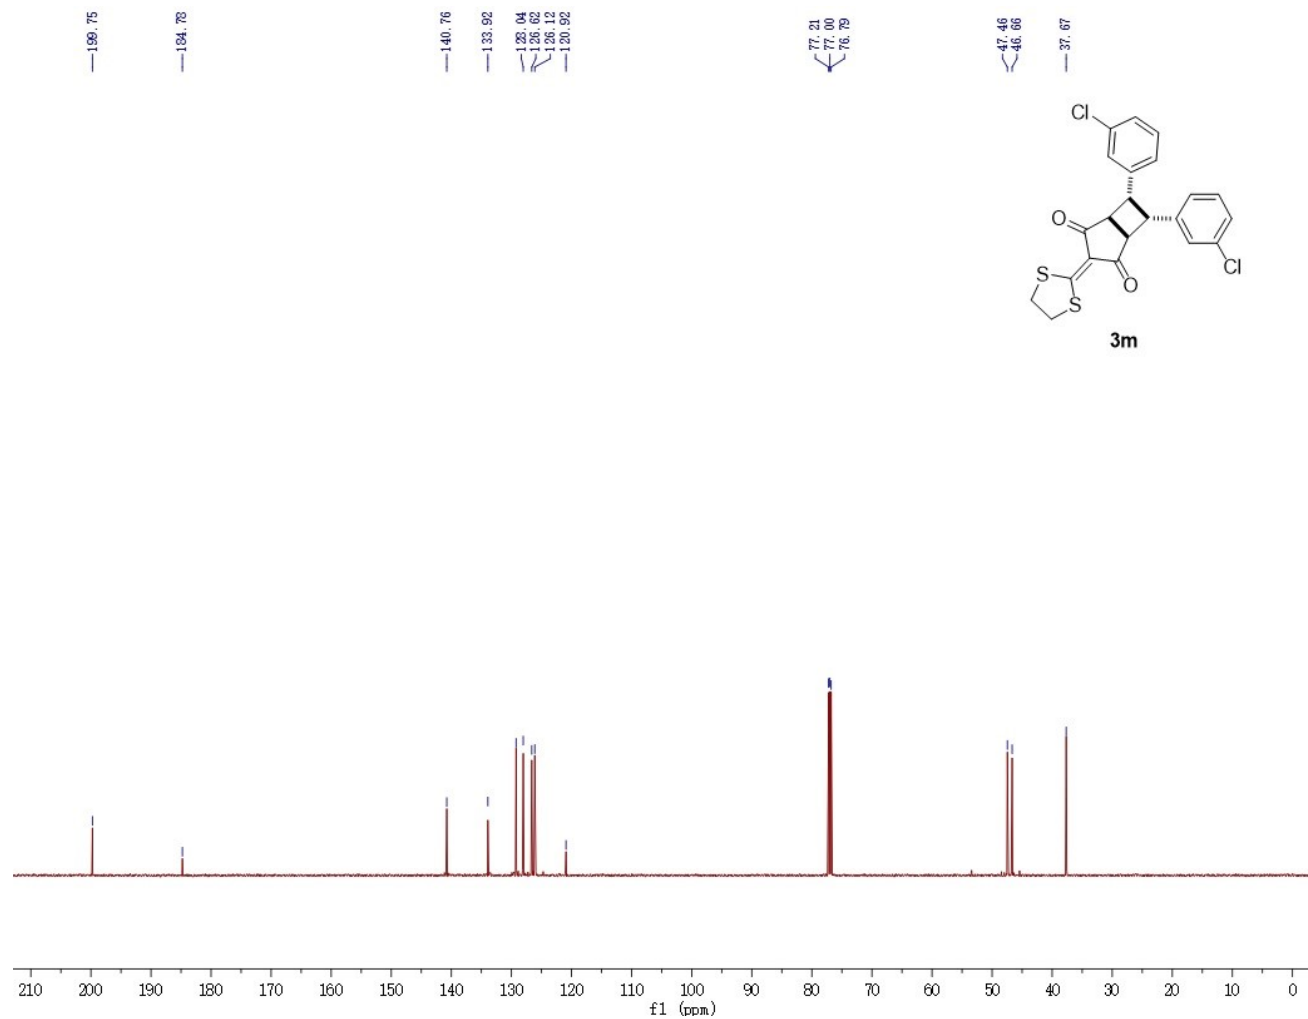

**<sup>1</sup>H spectrum (500 MHz, CDCl<sub>3</sub>) of compound 2n/2n'**

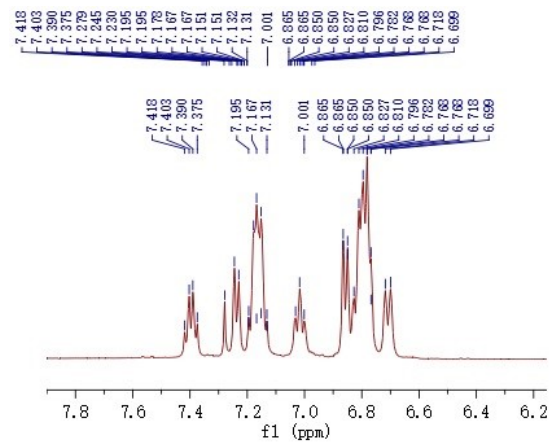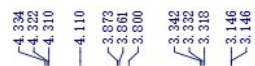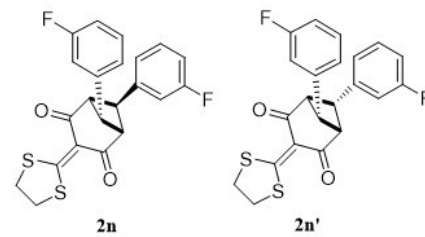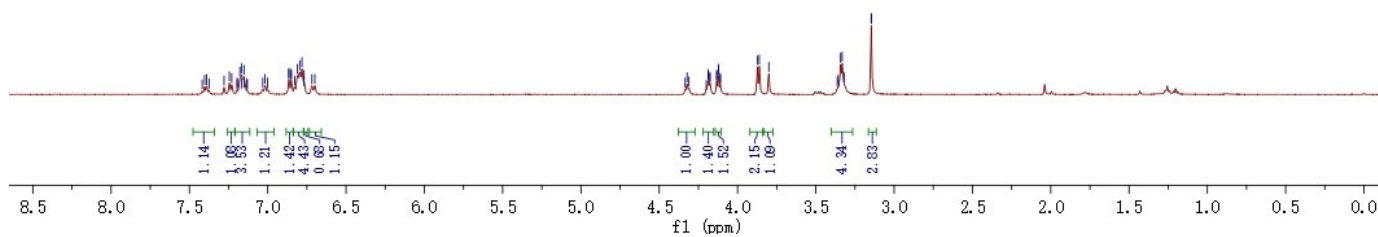

**<sup>13</sup>C spectrum (151 MHz, CDCl<sub>3</sub>) of compound 2n/2n'**

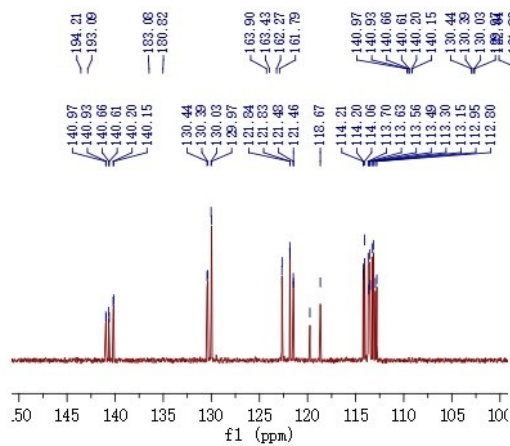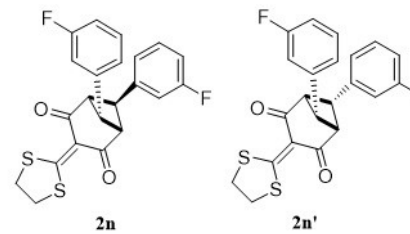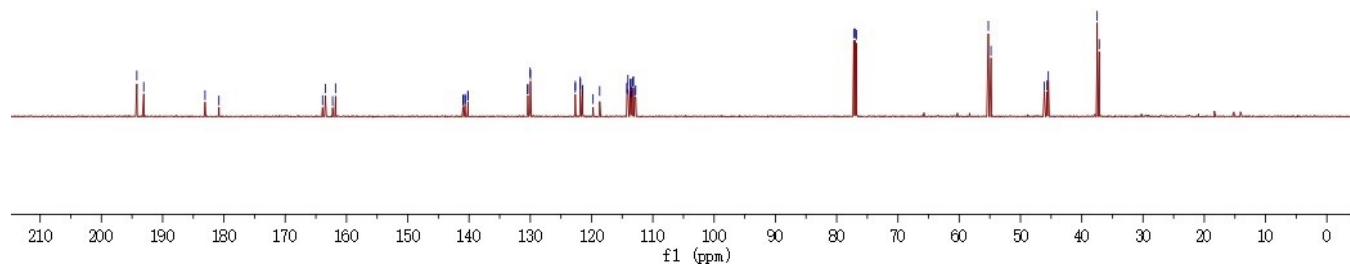



**<sup>1</sup>H spectrum (500 MHz, CDCl<sub>3</sub>) of compound 3n**

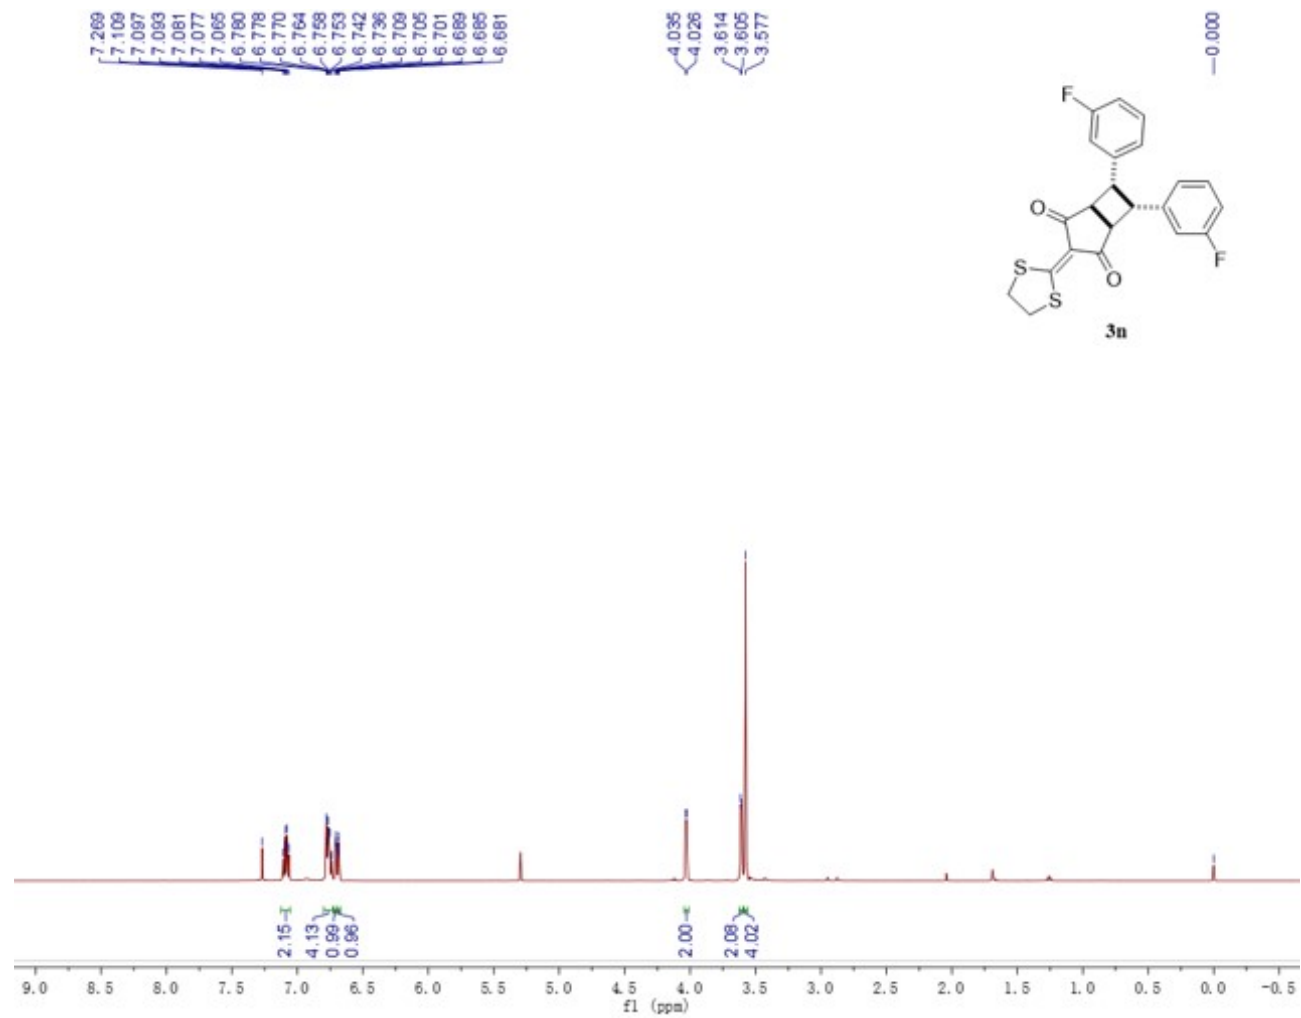

<sup>13</sup>C spectrum (151 MHz, CDCl<sub>3</sub>) of compound 3n

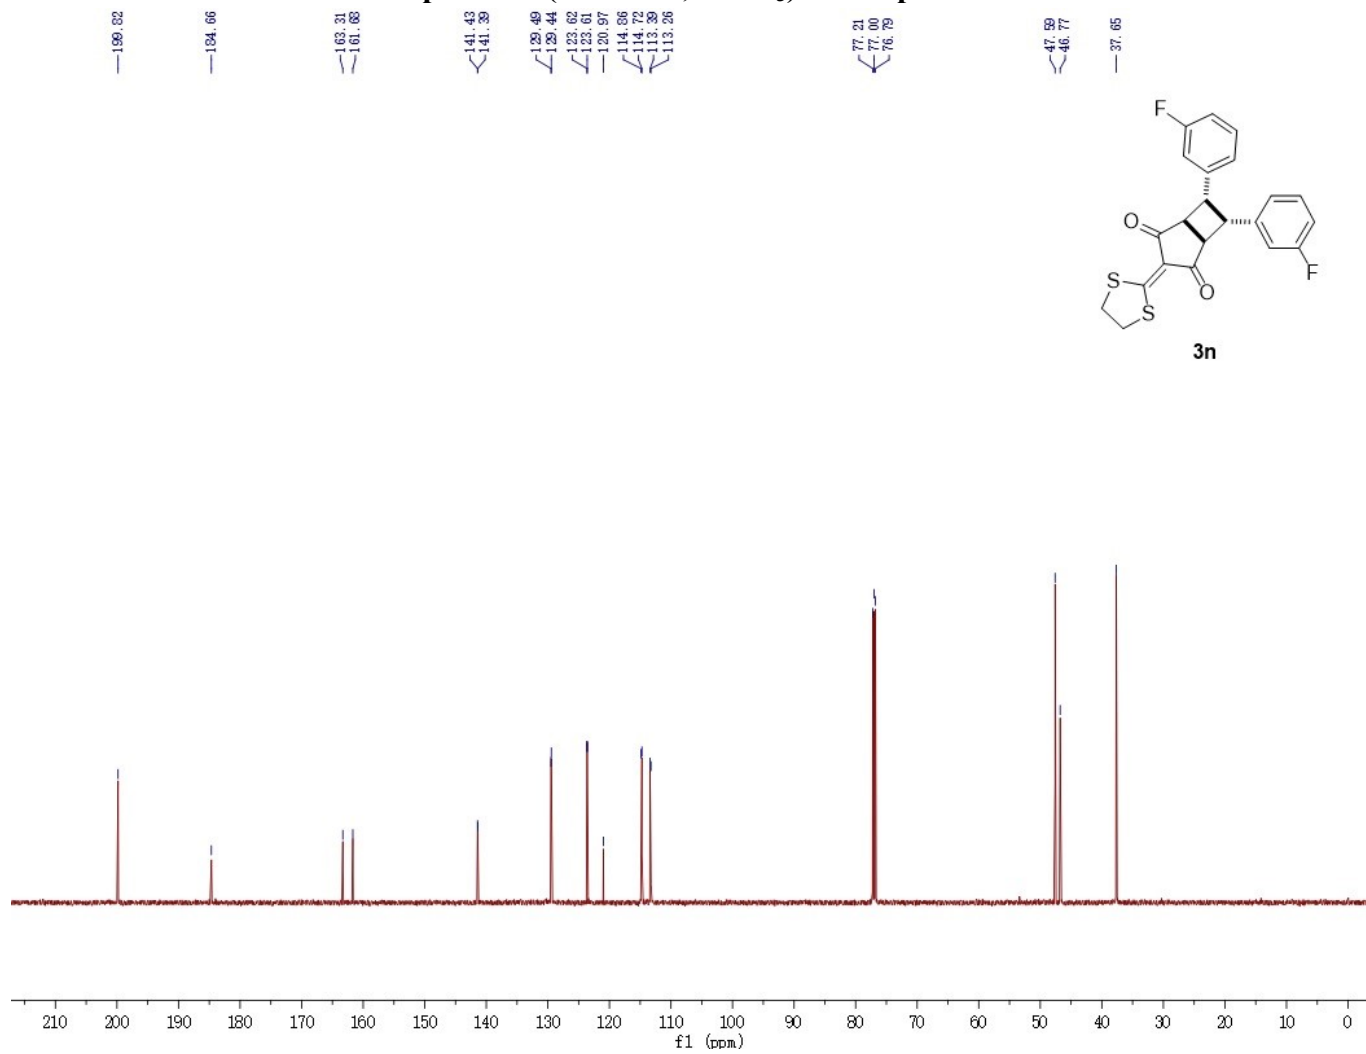

**<sup>1</sup>H spectrum (500 MHz, CDCl<sub>3</sub>) of compound 2o/2o'**

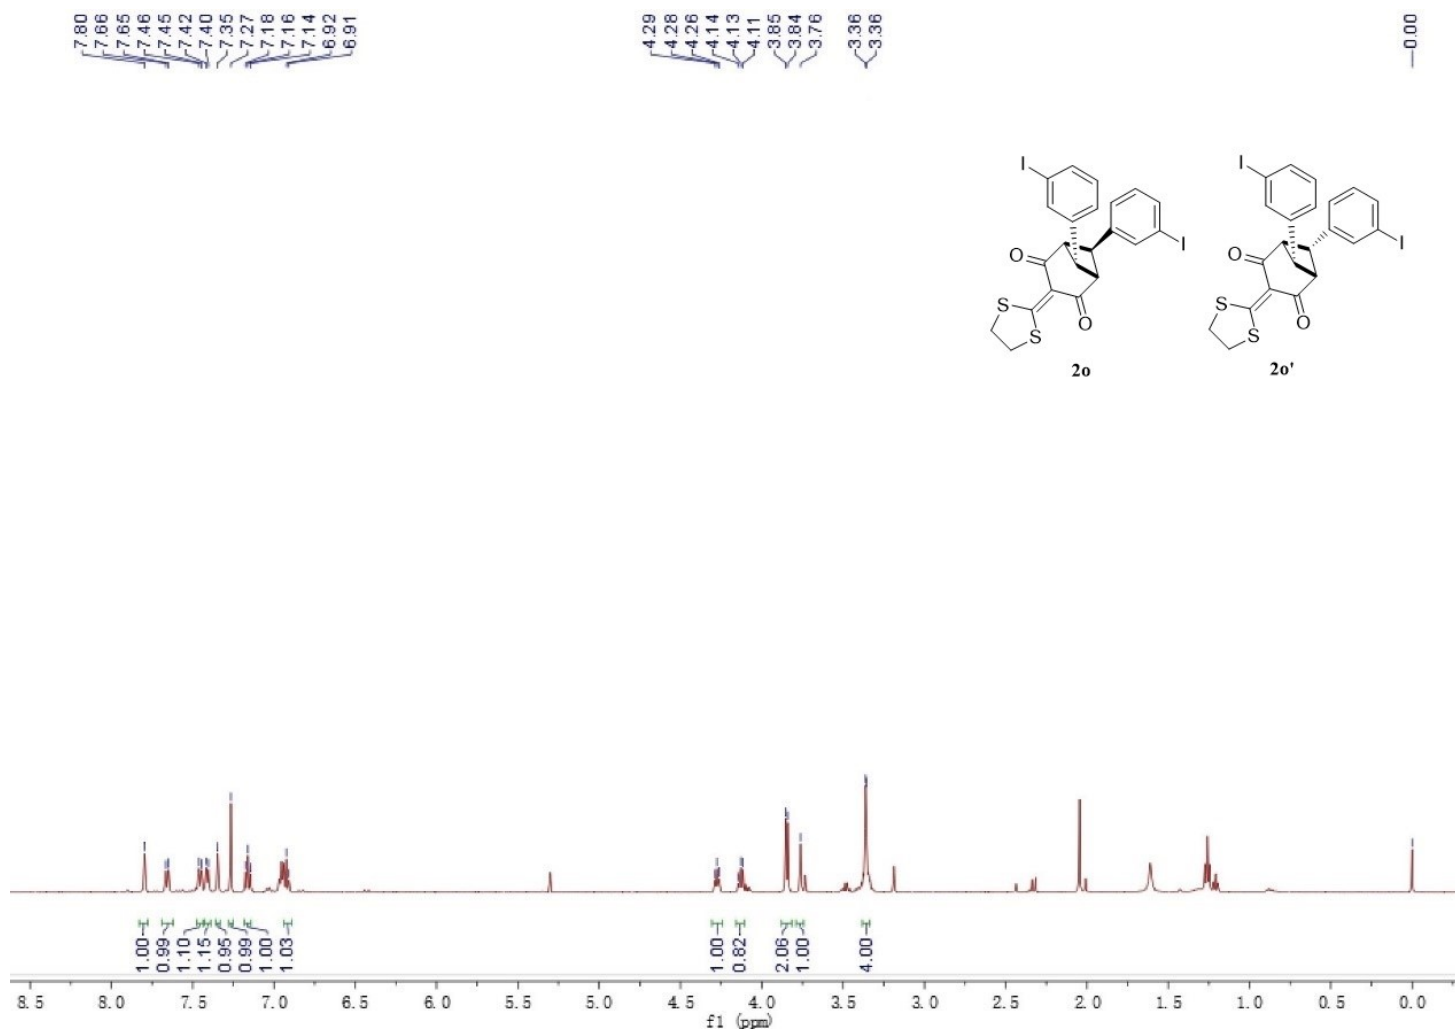

**$^{13}\text{C}$  spectrum (126 MHz,  $\text{CDCl}_3$ ) of compound 2o/2o'**

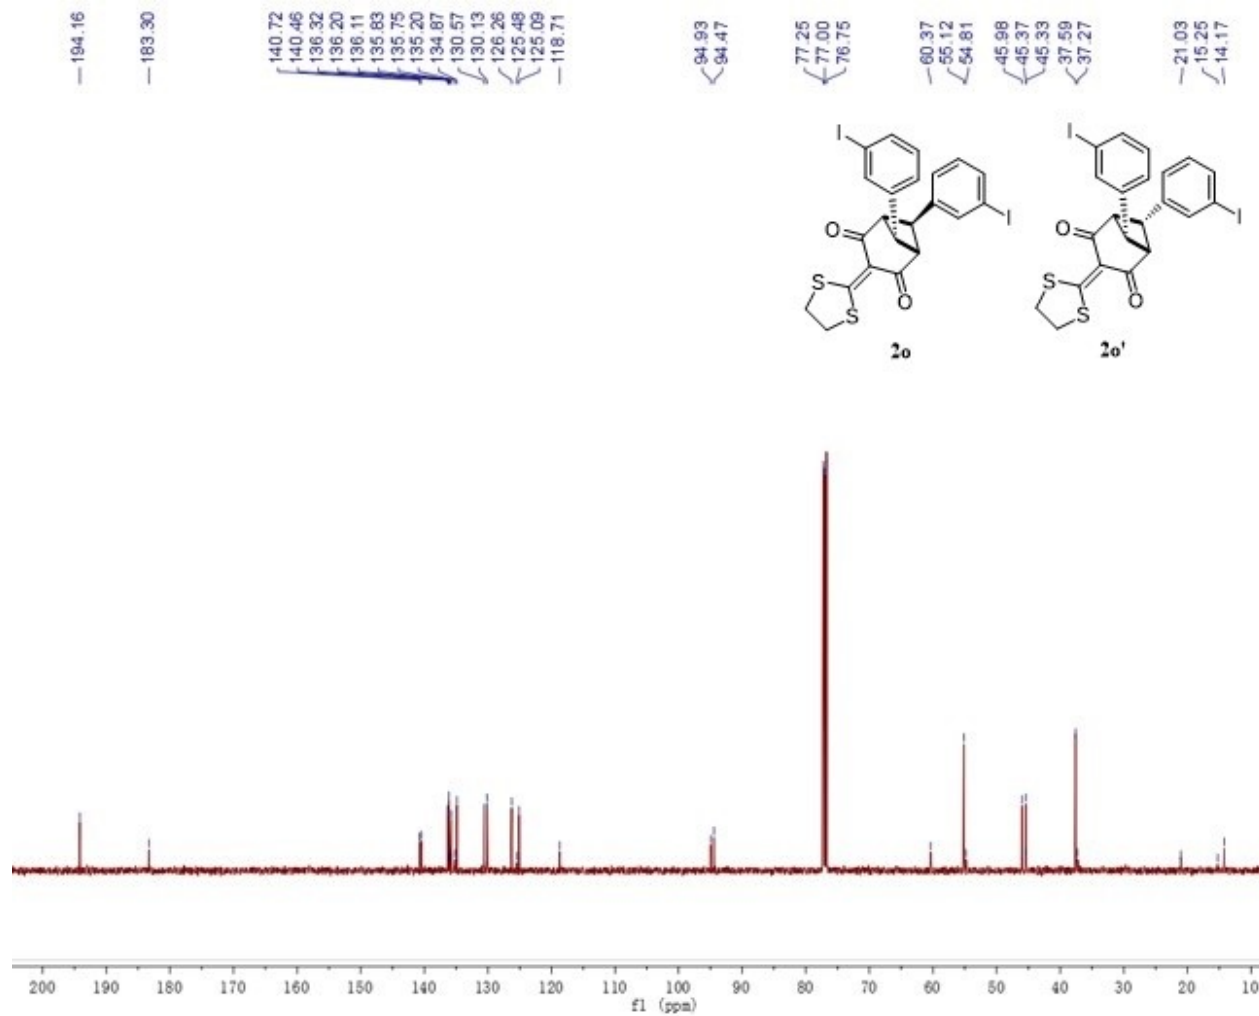

**$^1\text{H}$  spectrum (500 MHz,  $\text{CDCl}_3$ ) of compound 3o**

7.406  
7.391  
7.344  
7.267  
6.888  
6.883  
6.869  
6.824  
6.828

3.956  
3.948  
3.580

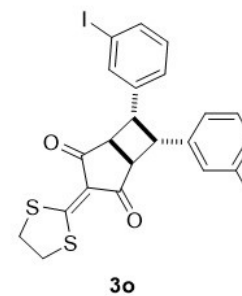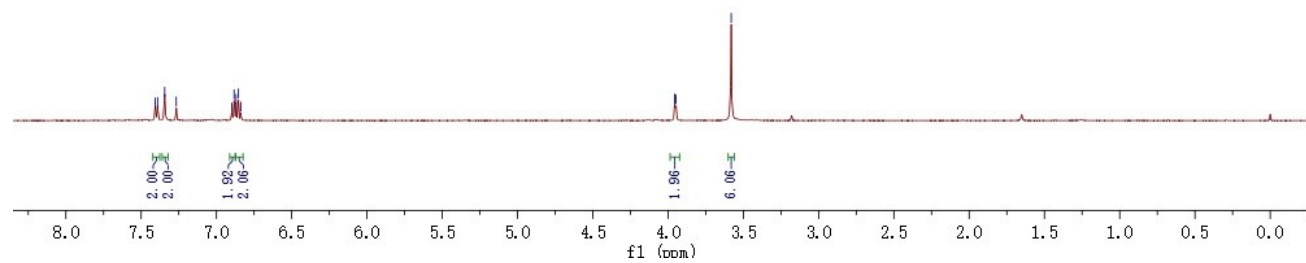

**<sup>13</sup>C spectrum (151 MHz, CDCl<sub>3</sub>) of compound 3o**

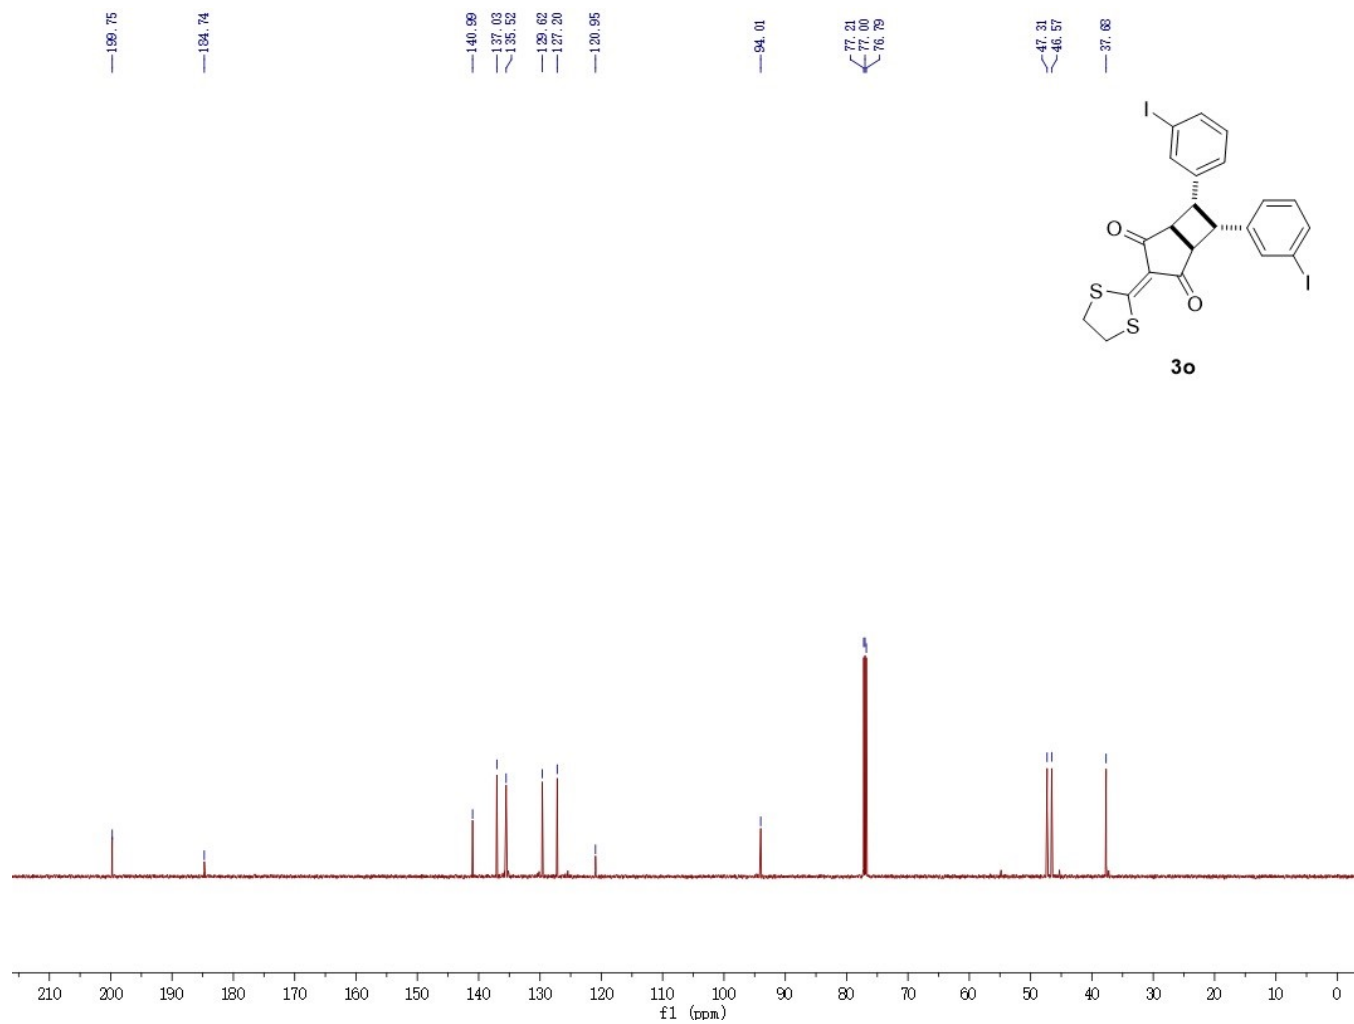

**<sup>1</sup>H spectrum (600 MHz, CDCl<sub>3</sub>) of compound 2p/2p'**

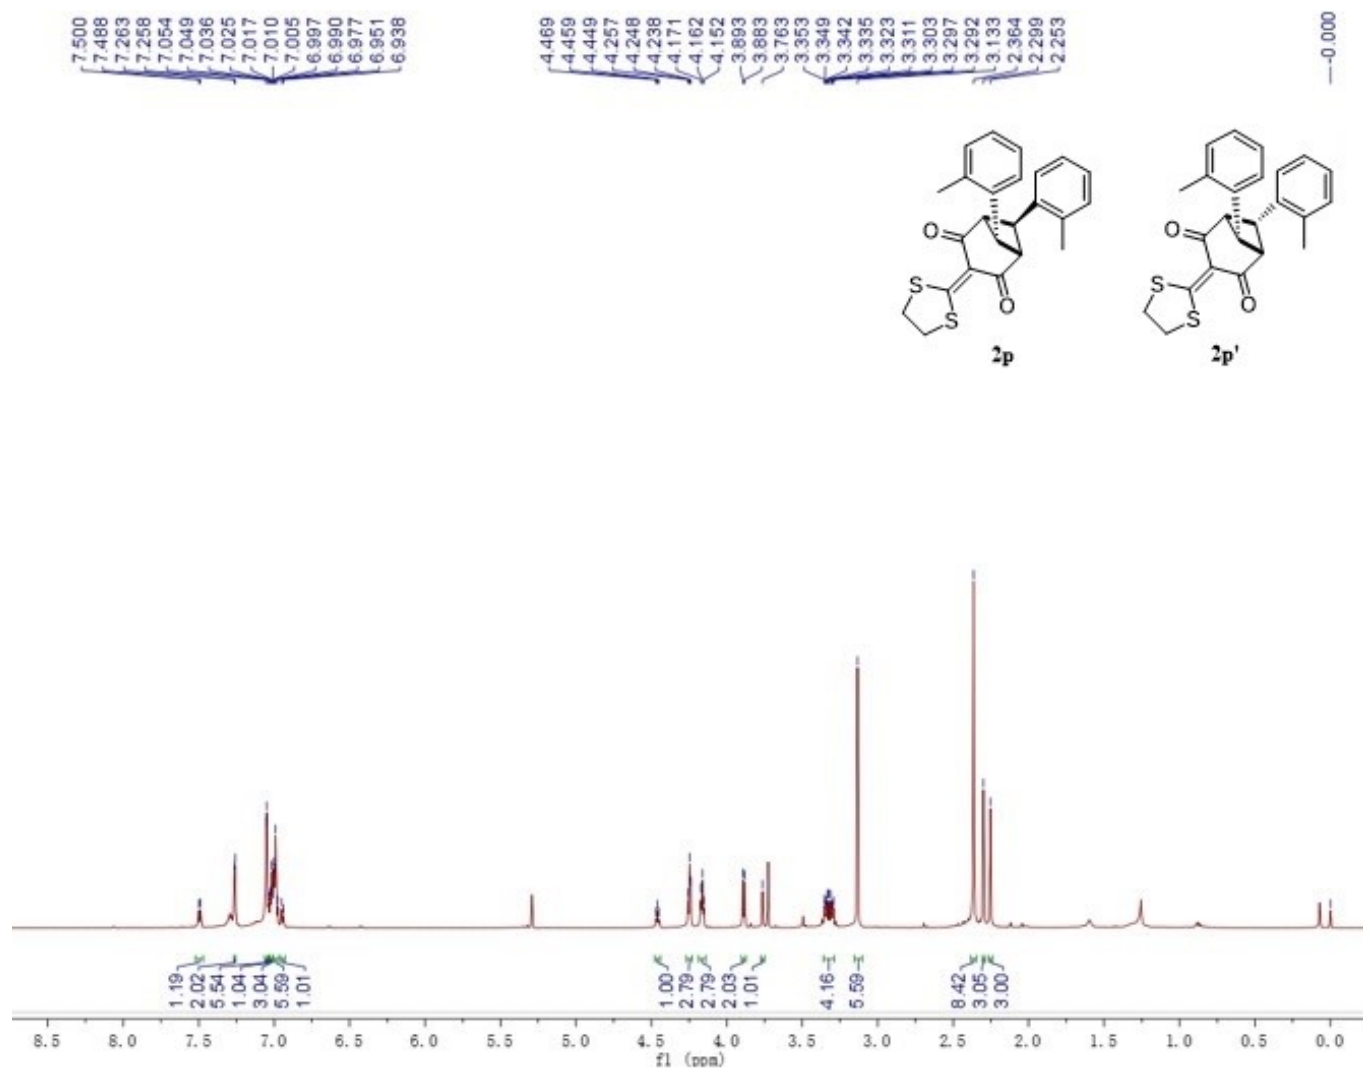

**<sup>13</sup>C spectrum (151 MHz, CDCl<sub>3</sub>) of compound 2p/2p'**

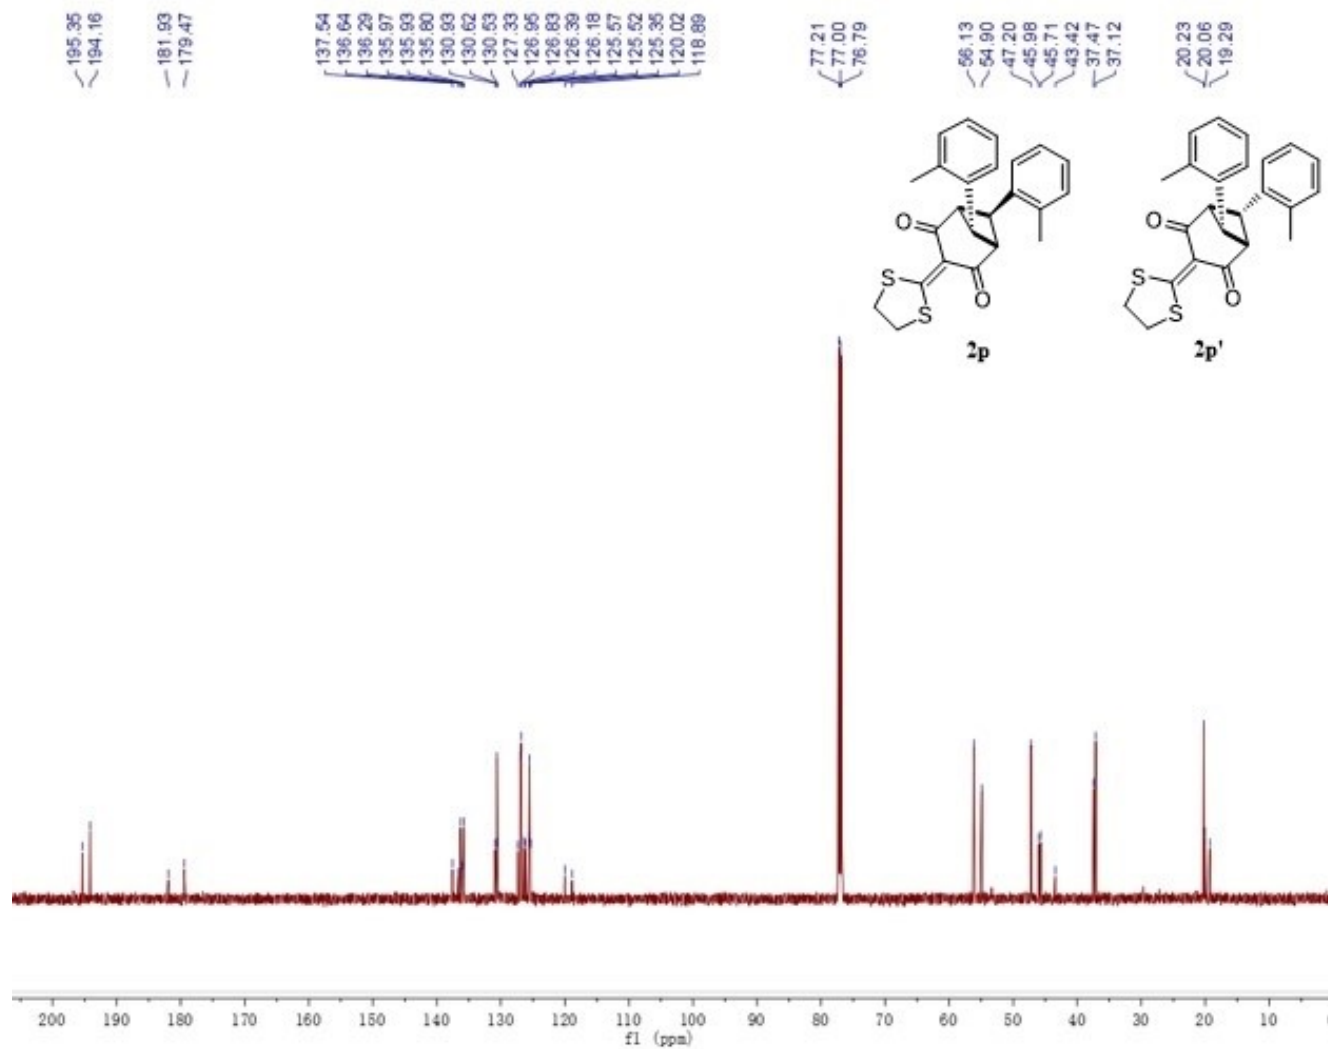



<sup>1</sup>H spectrum (500 MHz, CDCl<sub>3</sub>) of compound 3p

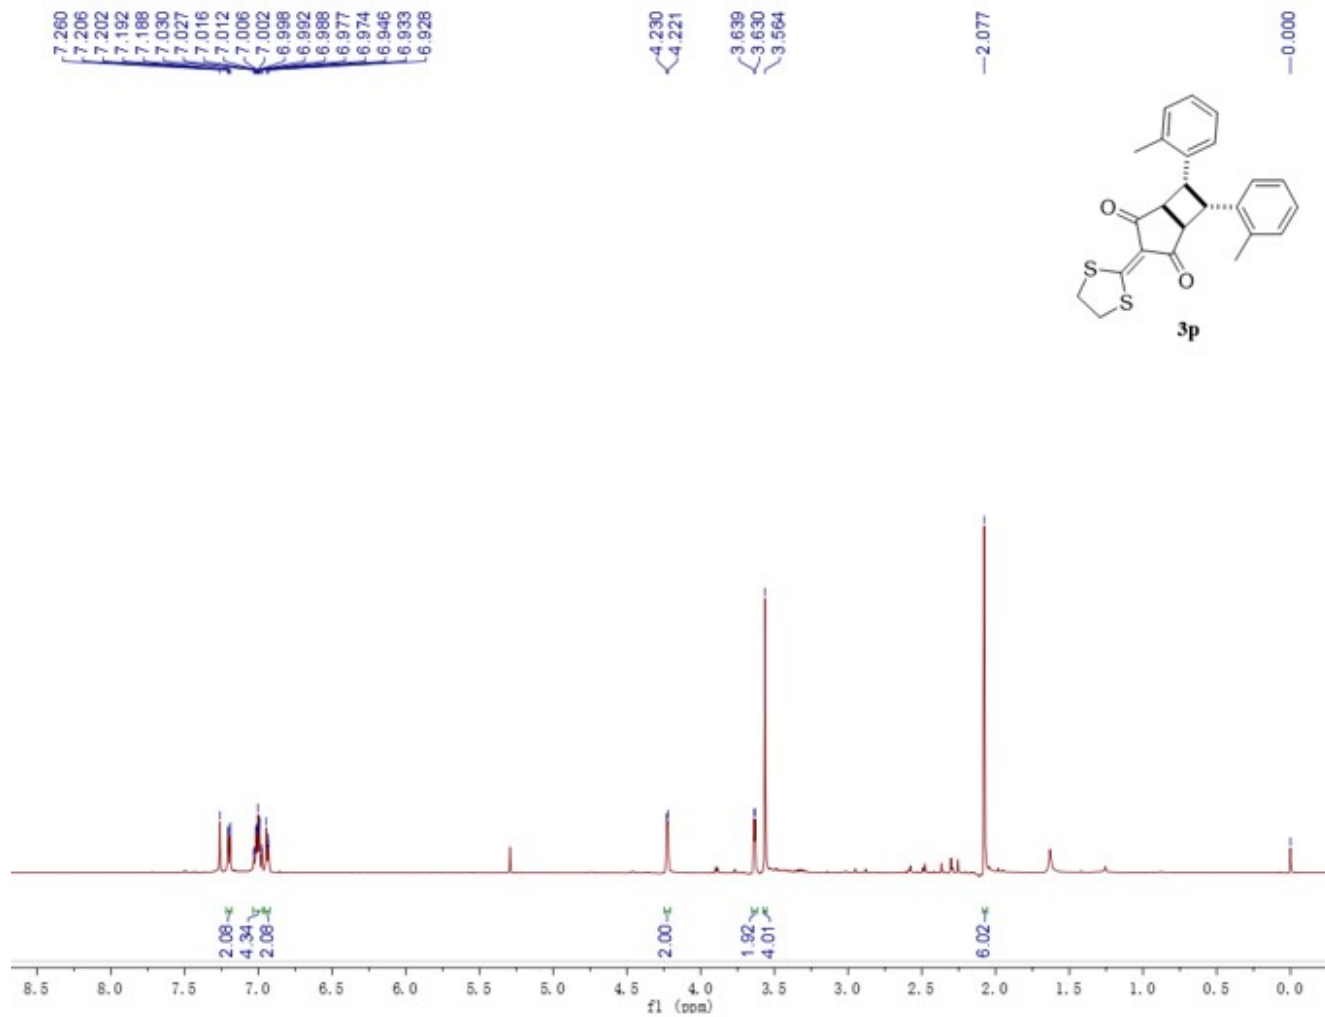

<sup>13</sup>C spectrum (151 MHz, CDCl<sub>3</sub>) of compound 3p

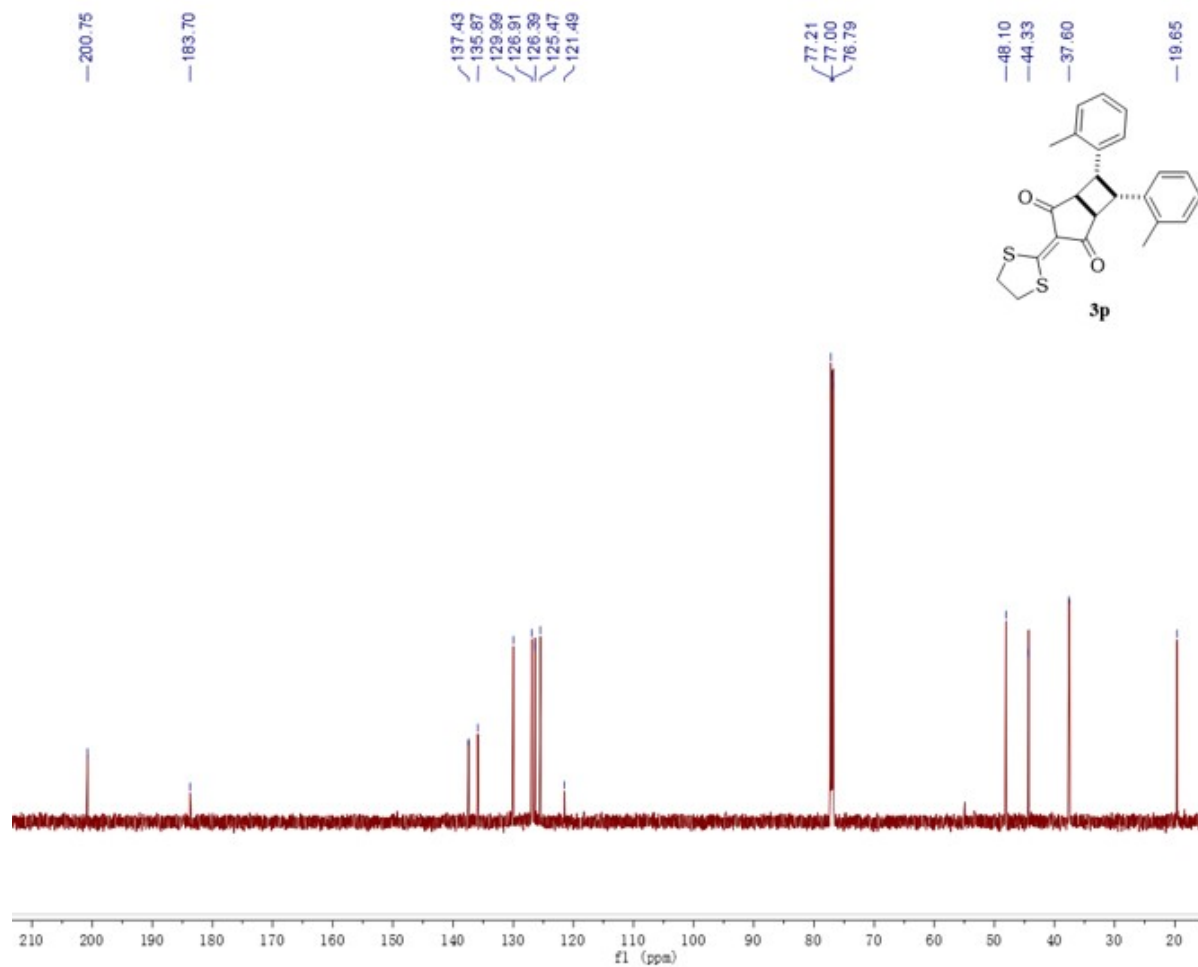

**<sup>1</sup>H spectrum (500 MHz, CDCl<sub>3</sub>) of compound 2q/2q'**

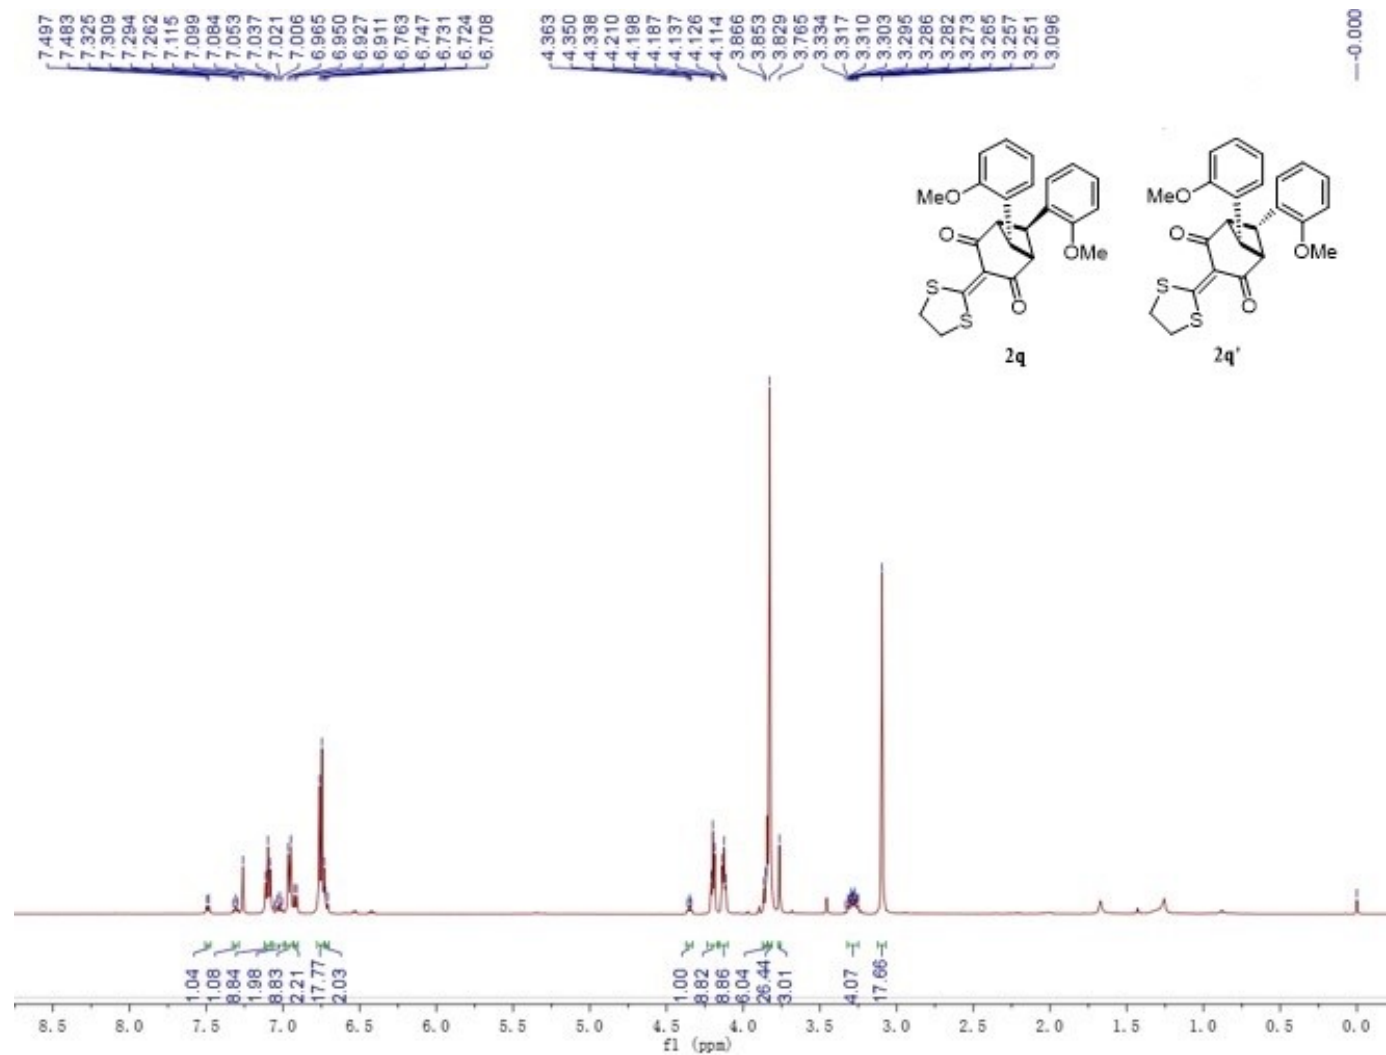

**<sup>13</sup>C spectrum (151 MHz, CDCl<sub>3</sub>) of compound 2q/2q'**

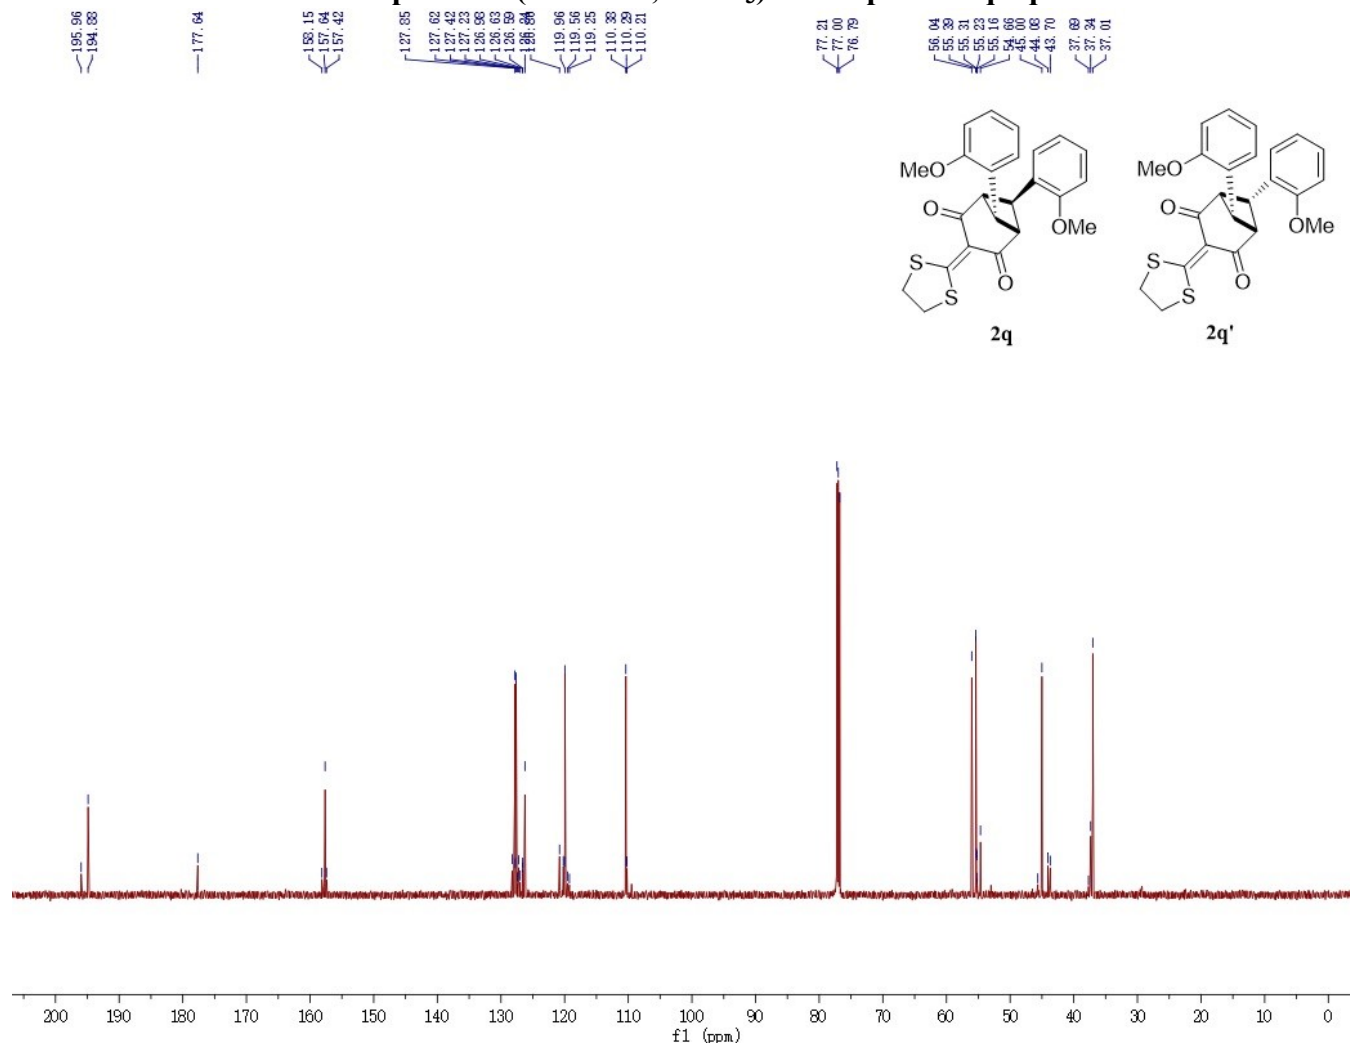

<sup>1</sup>H spectrum (500 MHz, CDCl<sub>3</sub>) of compound 3q

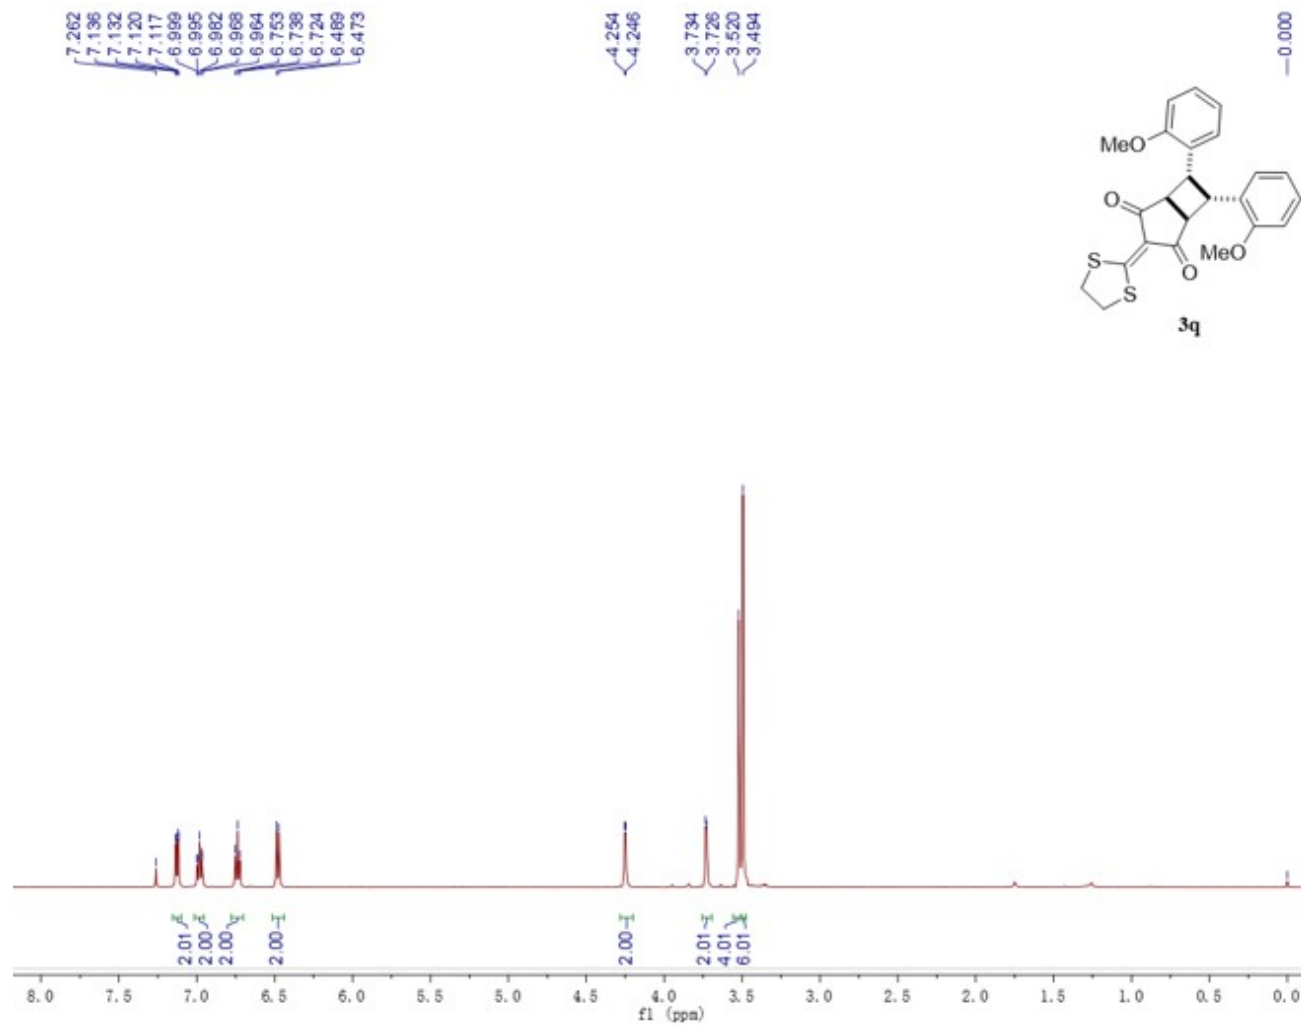

**<sup>13</sup>C spectrum (151 MHz, CDCl<sub>3</sub>) of compound 3q**

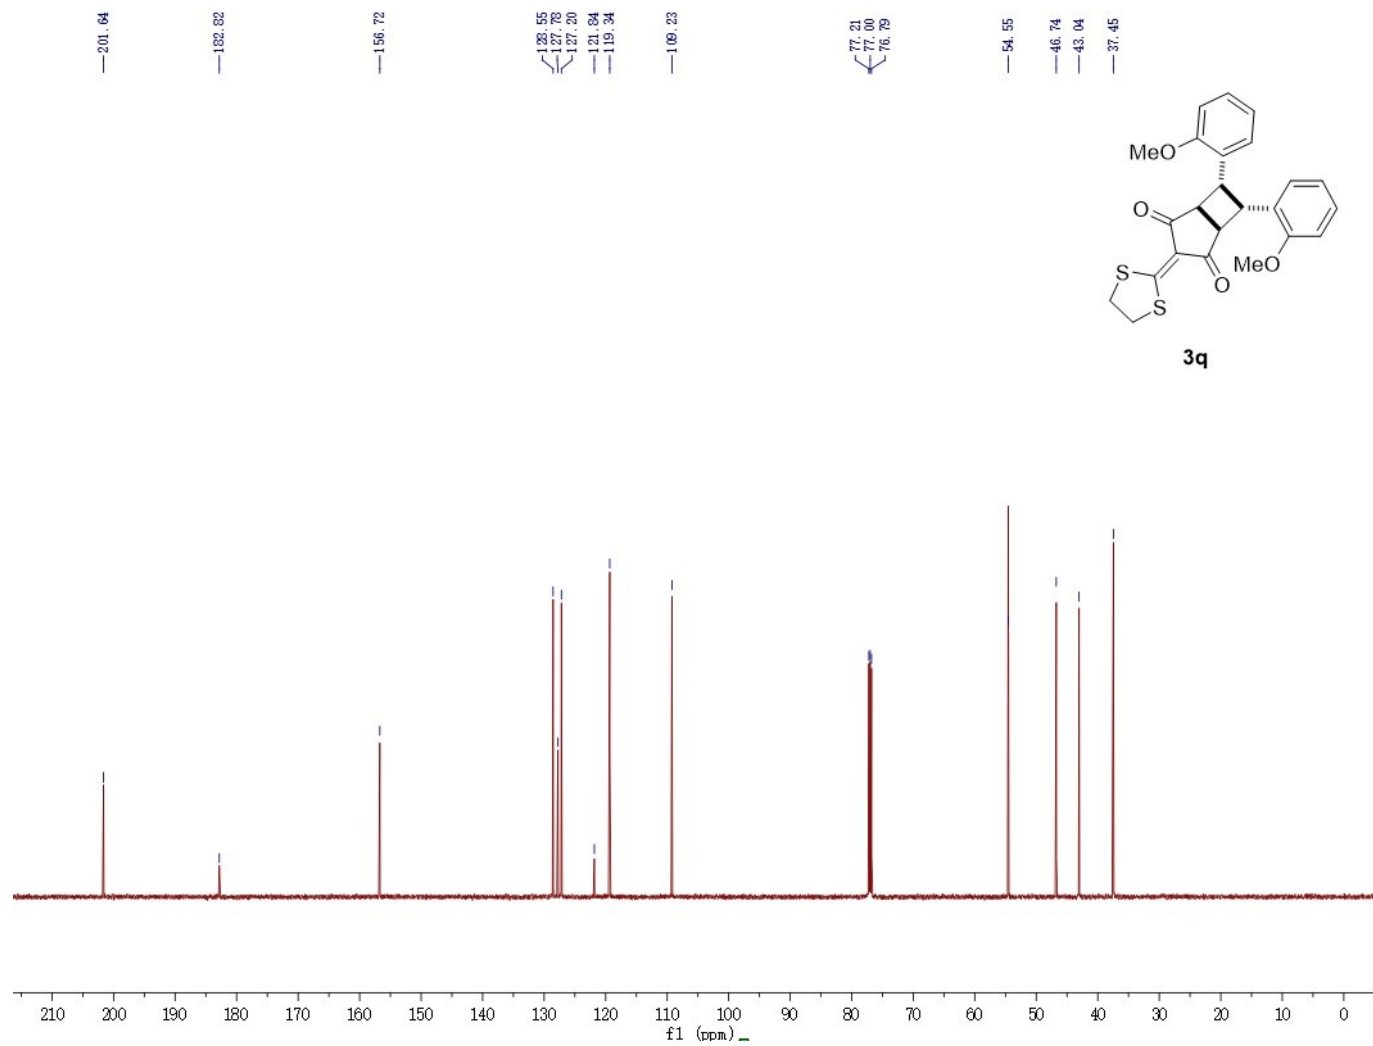

**<sup>1</sup>H spectrum (600 MHz, CDCl<sub>3</sub>) of compound 2r/2r'**

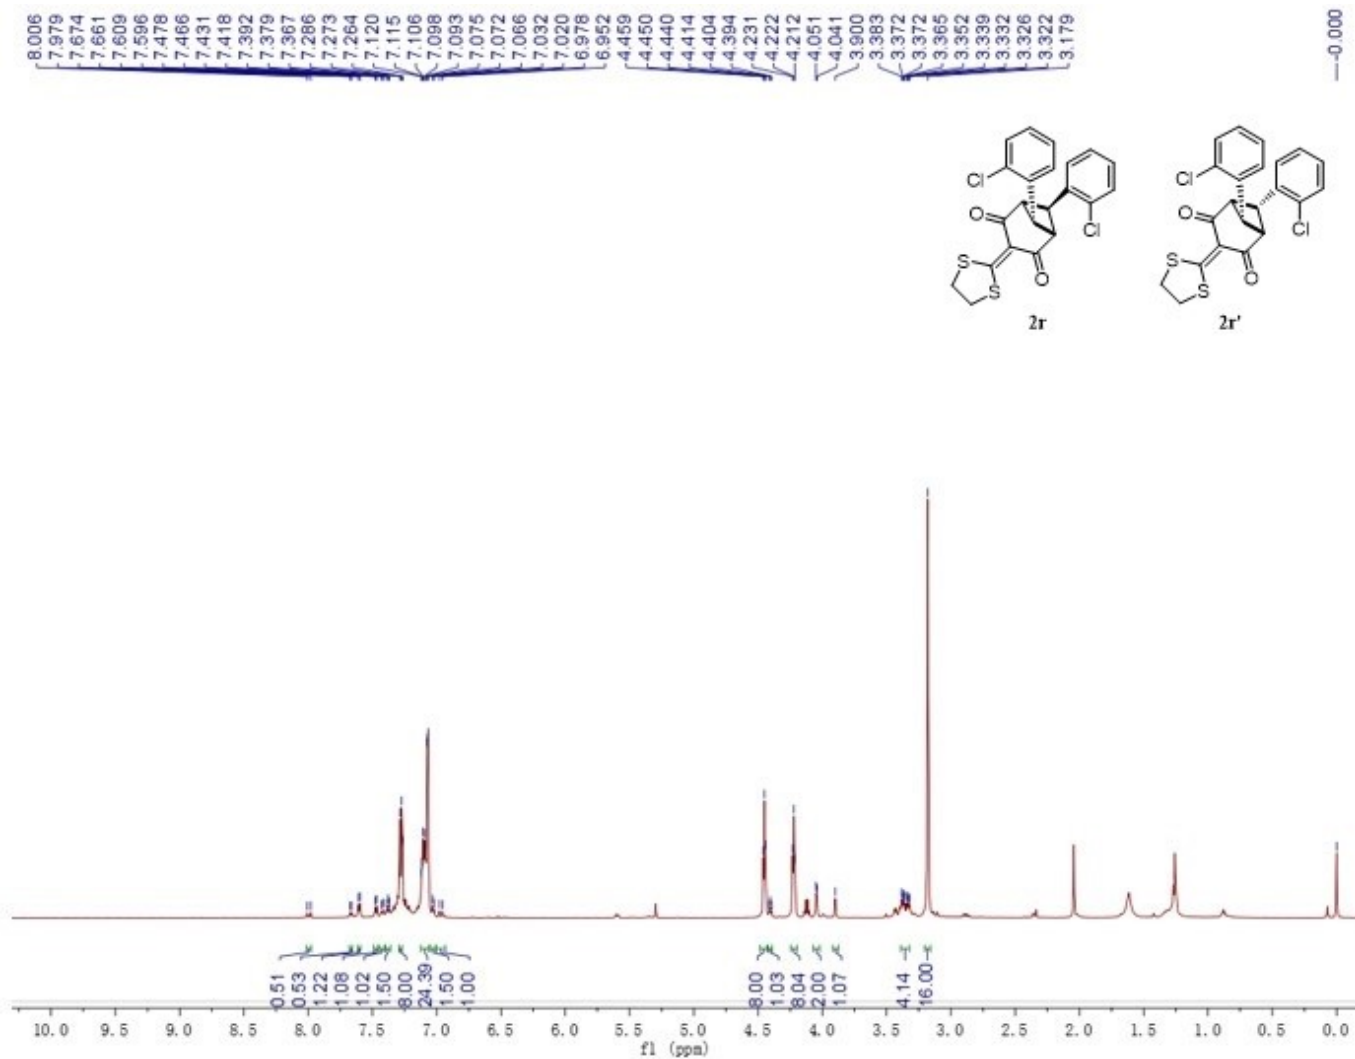

**<sup>13</sup>C spectrum (151 MHz, CDCl<sub>3</sub>) of compound 2r/2r'**

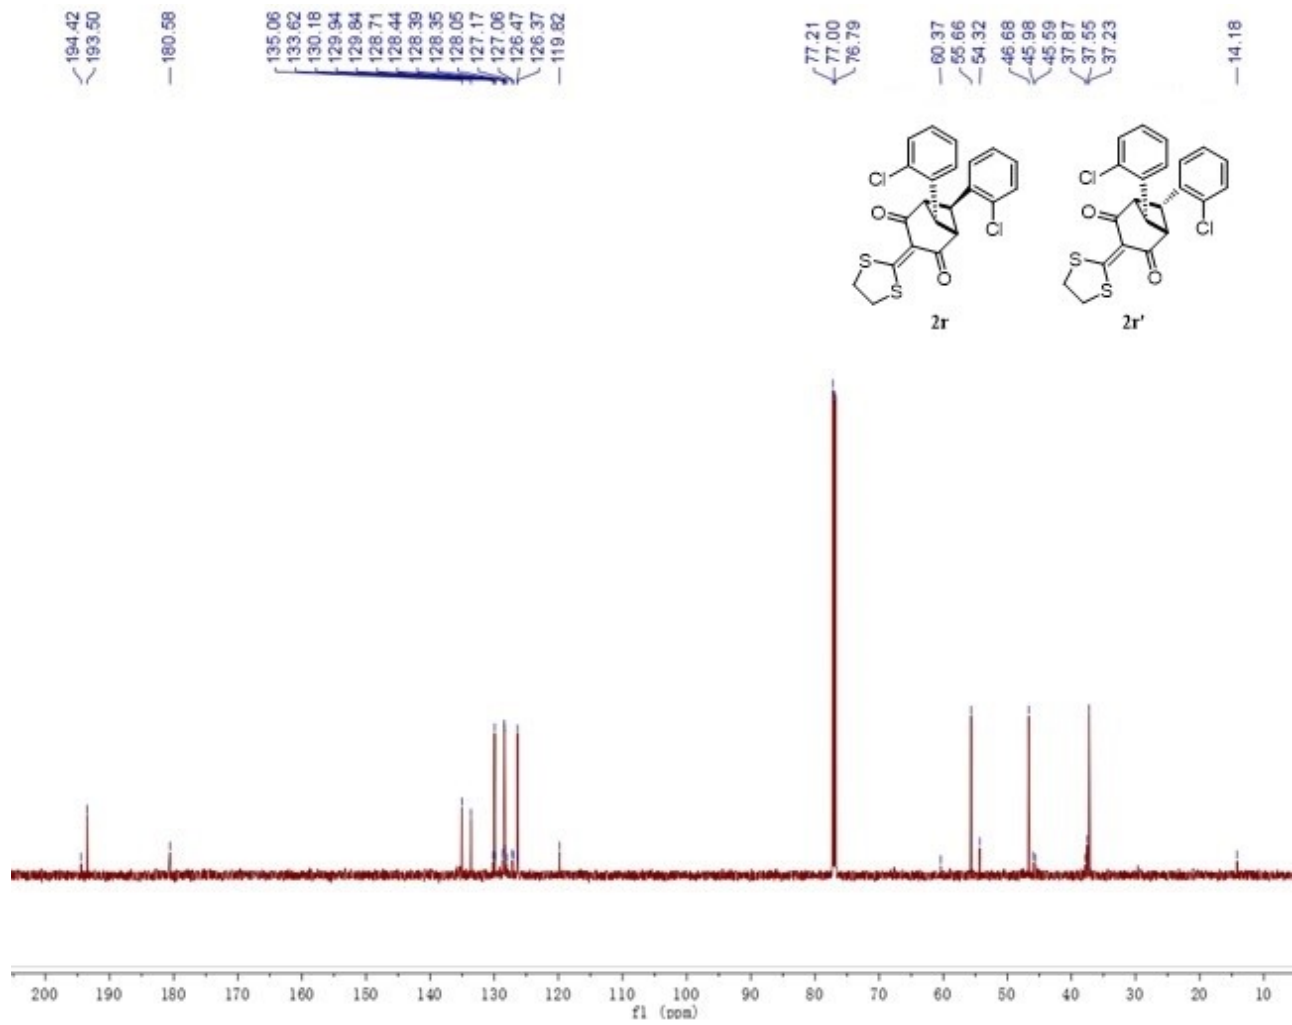



<sup>1</sup>H spectrum (600 MHz, CDCl<sub>3</sub>) of compound 3r

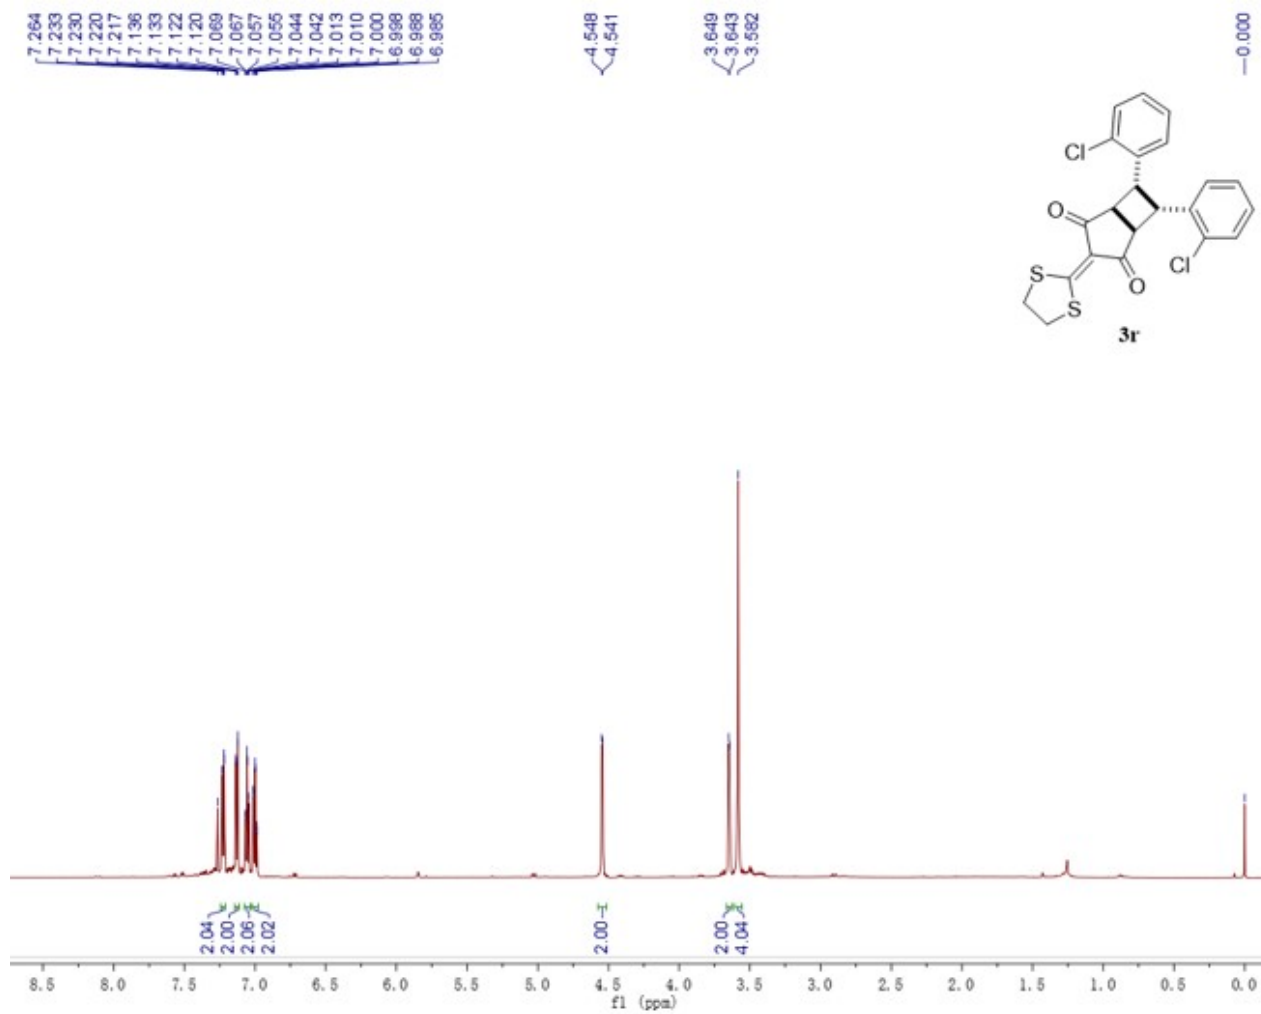

<sup>13</sup>C spectrum (151 MHz, CDCl<sub>3</sub>) of compound 3r

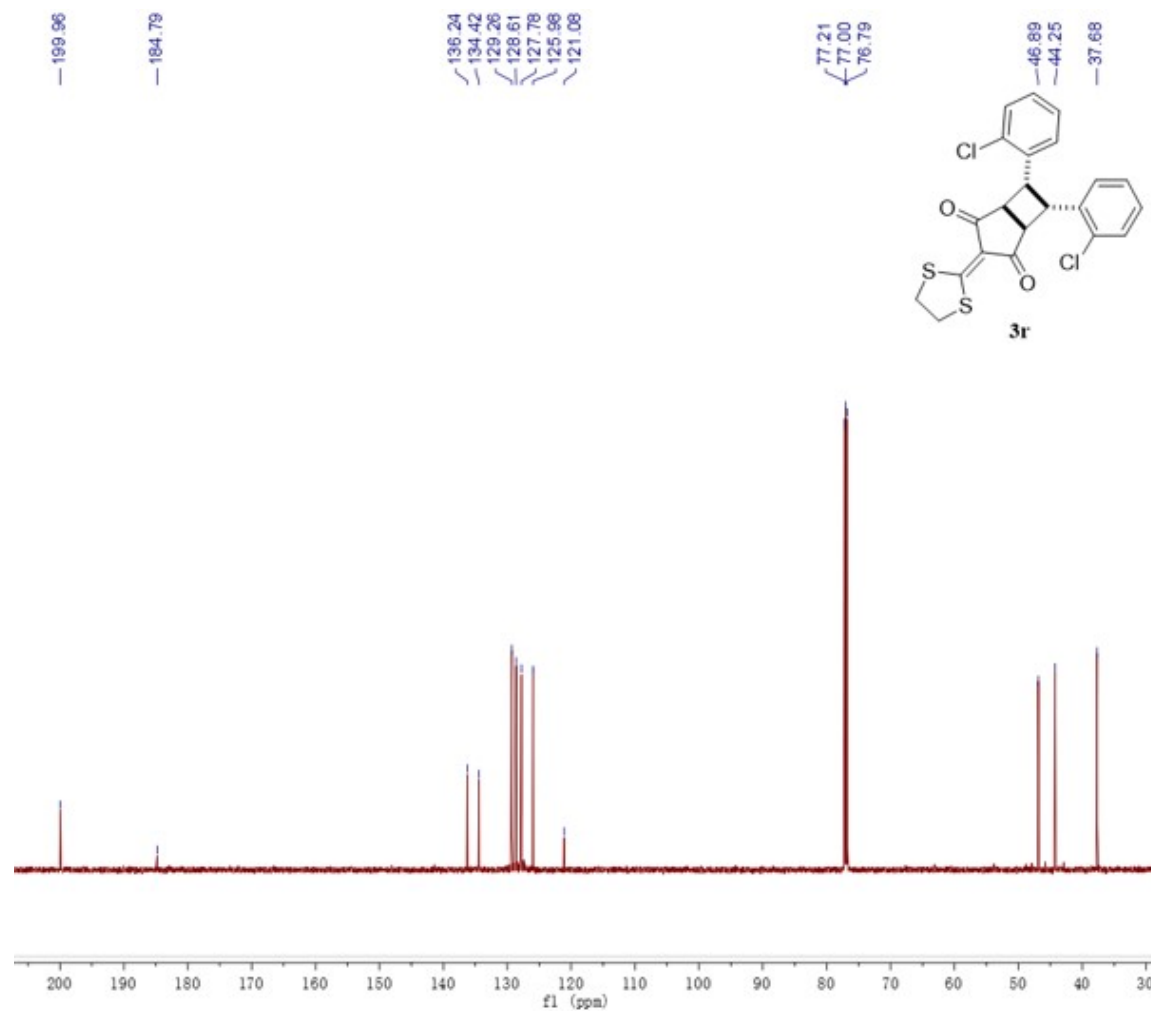

<sup>1</sup>H spectrum (600 MHz, CDCl<sub>3</sub>) of compound 2s/2s'

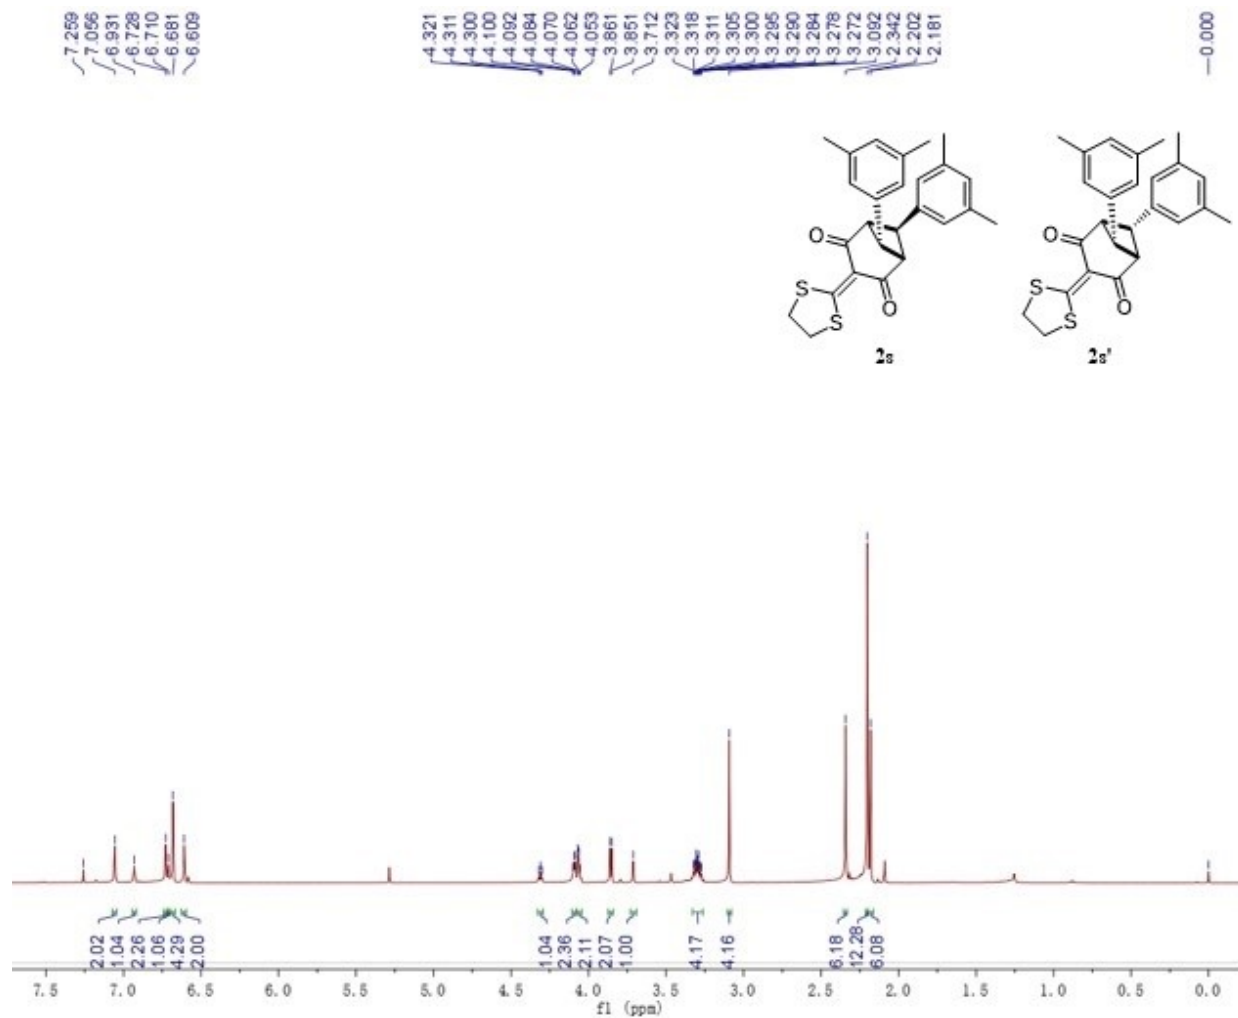

<sup>13</sup>C spectrum (151 MHz, CDCl<sub>3</sub>) of compound 2s/2s'

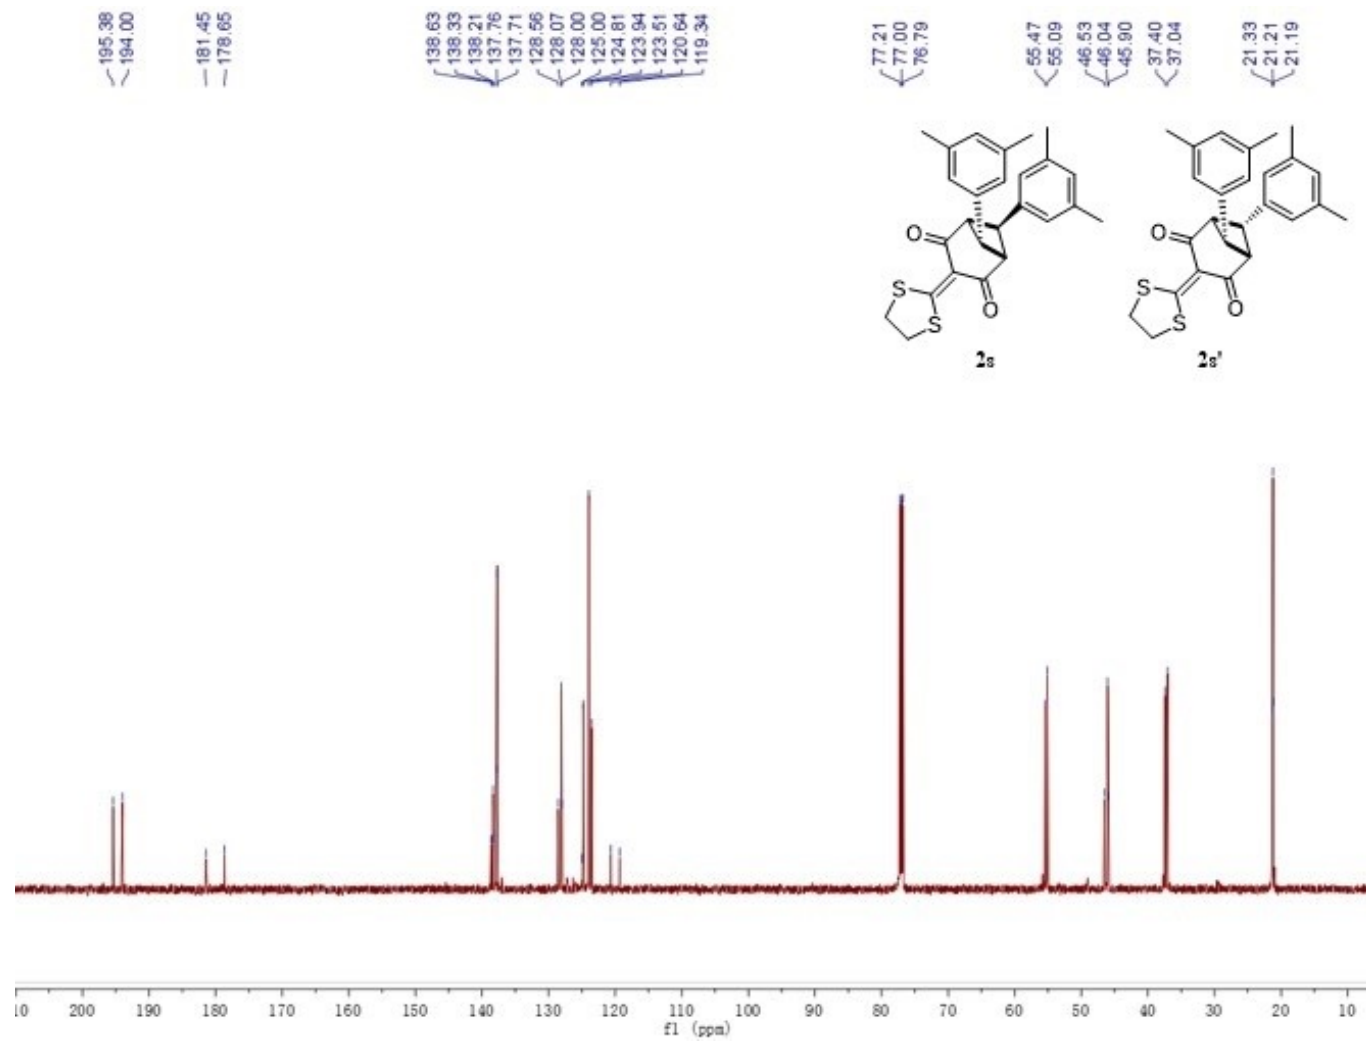

<sup>1</sup>H spectrum (500 MHz, CDCl<sub>3</sub>) of compound 3s

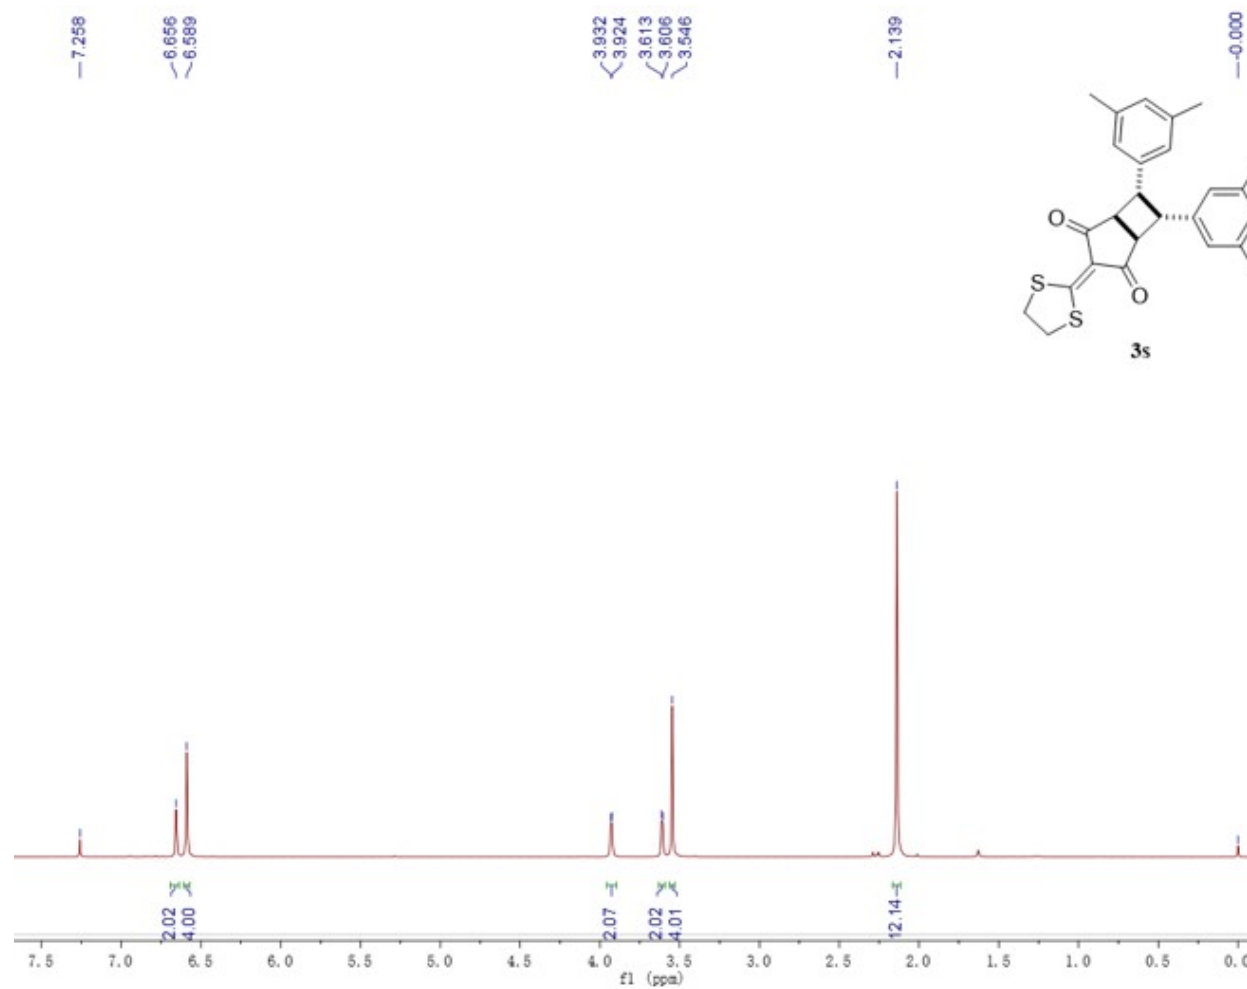

$^{13}\text{C}$  spectrum (151 MHz,  $\text{CDCl}_3$ ) of compound **3s**

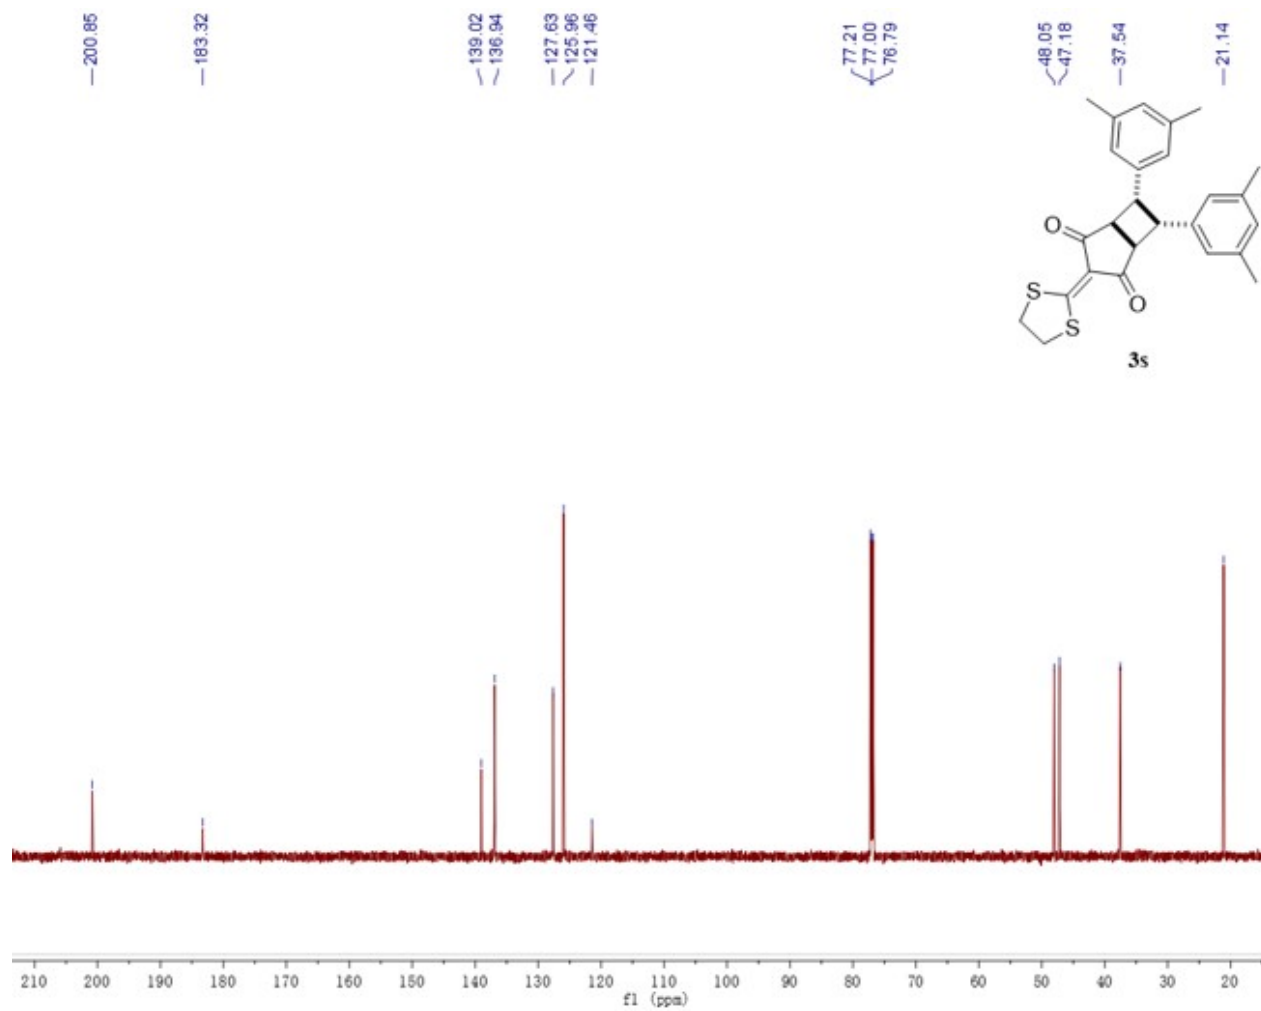

<sup>1</sup>H spectrum (600 MHz, CDCl<sub>3</sub>) of compound 3t

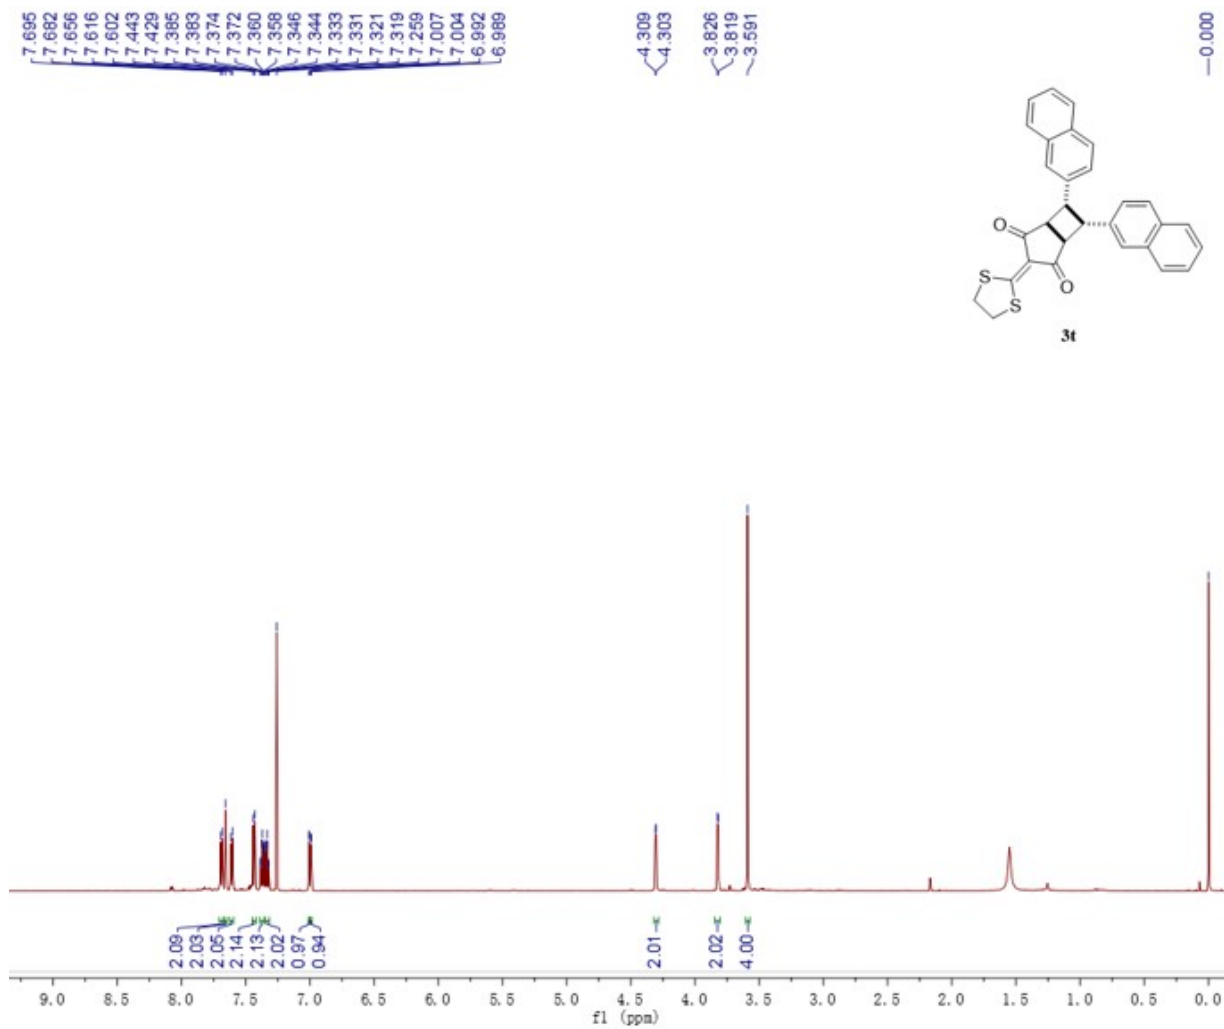

<sup>13</sup>C spectrum (126 MHz, CDCl<sub>3</sub>) of compound 3t

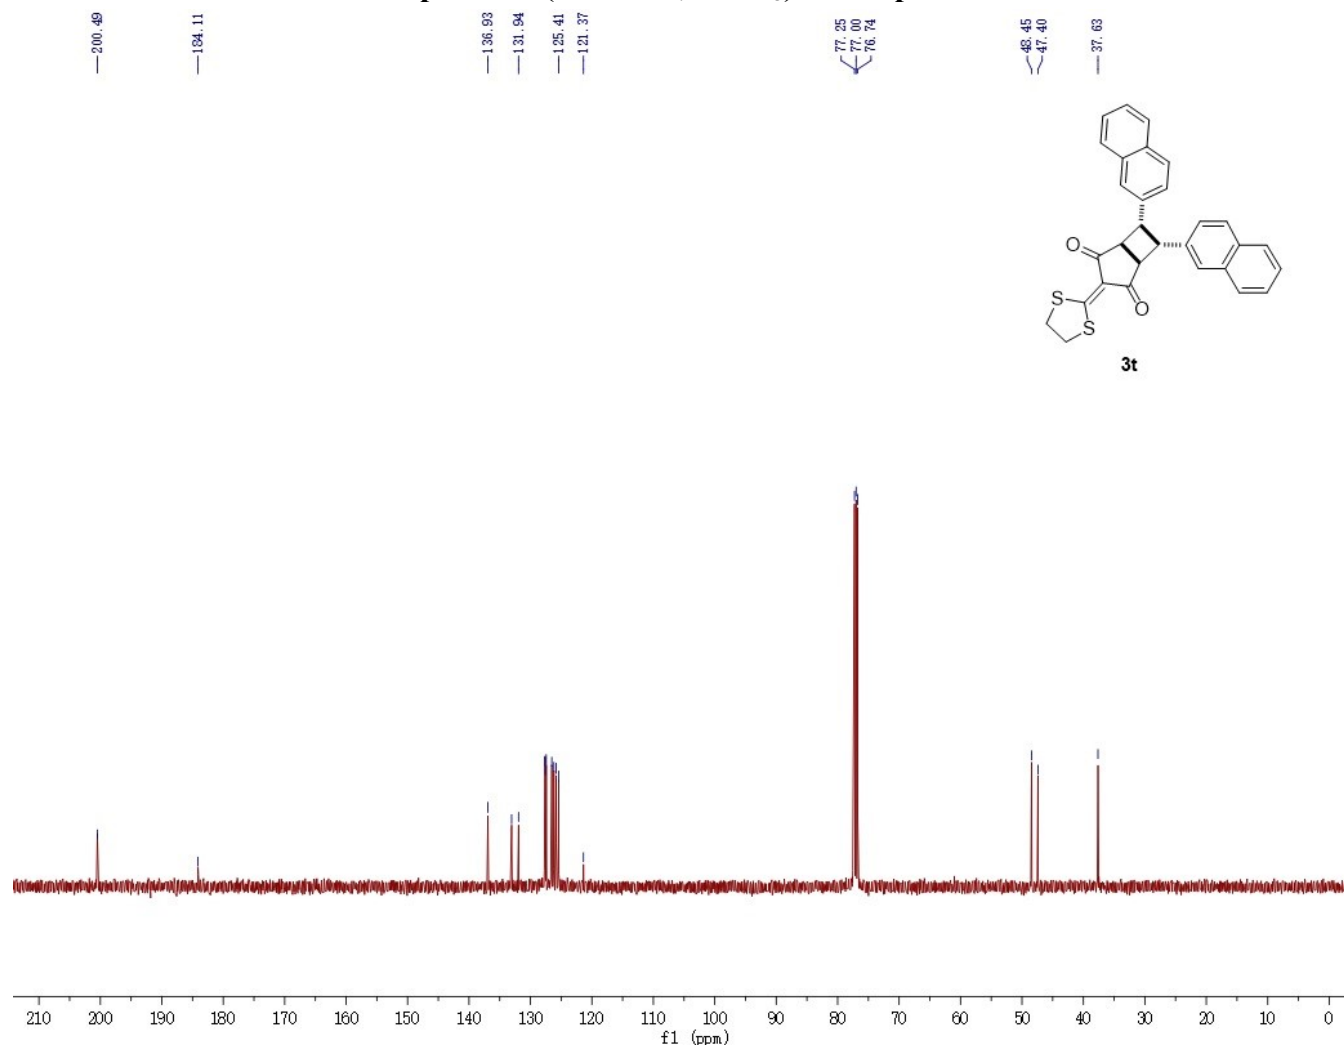



**<sup>1</sup>H spectrum (600 MHz, CDCl<sub>3</sub>) of compound 2u/2u'**

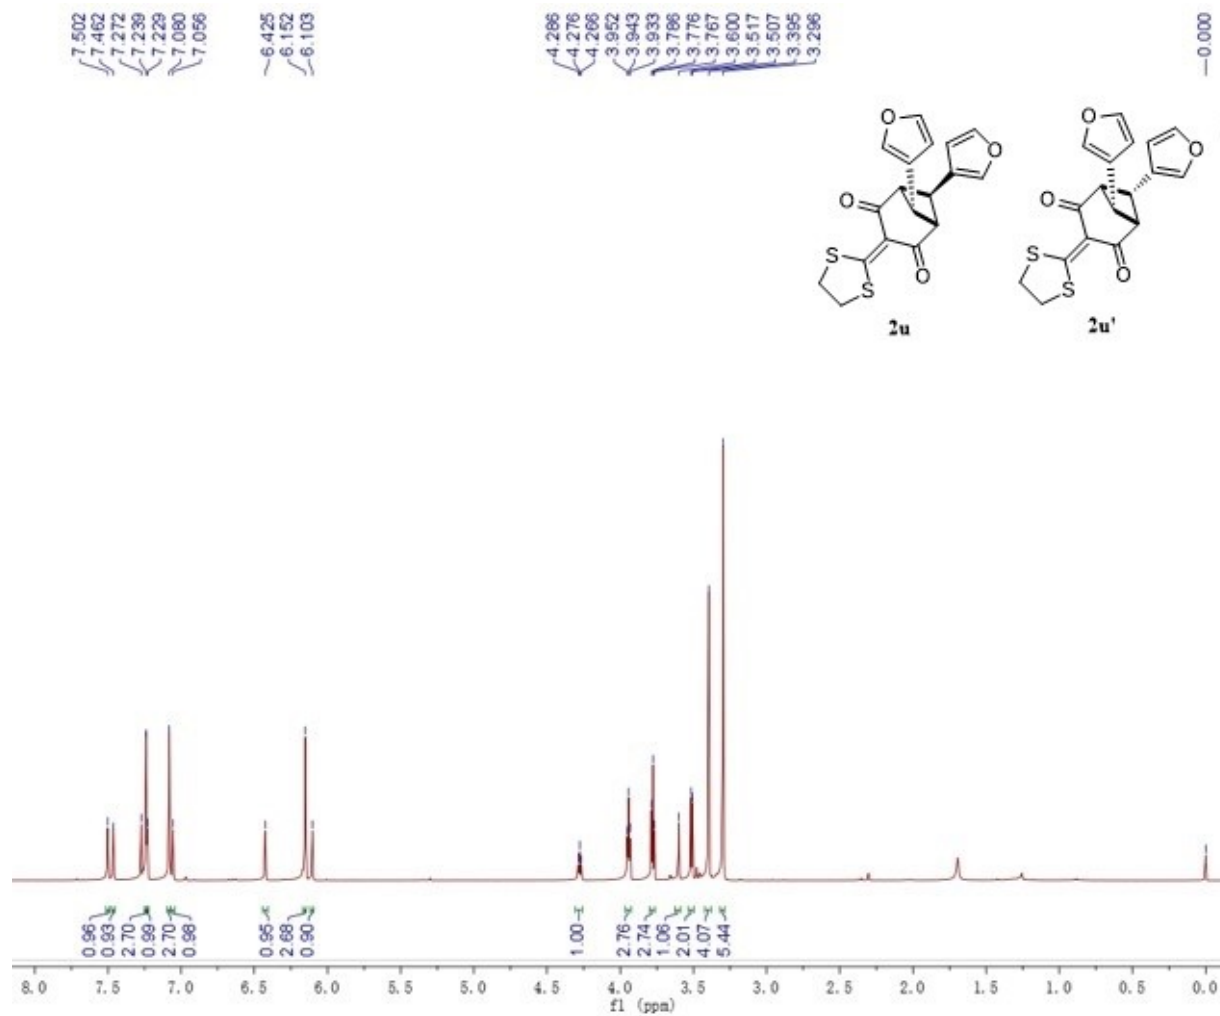

<sup>13</sup>C spectrum (151 MHz, CDCl<sub>3</sub>) of compound 2u/2u'

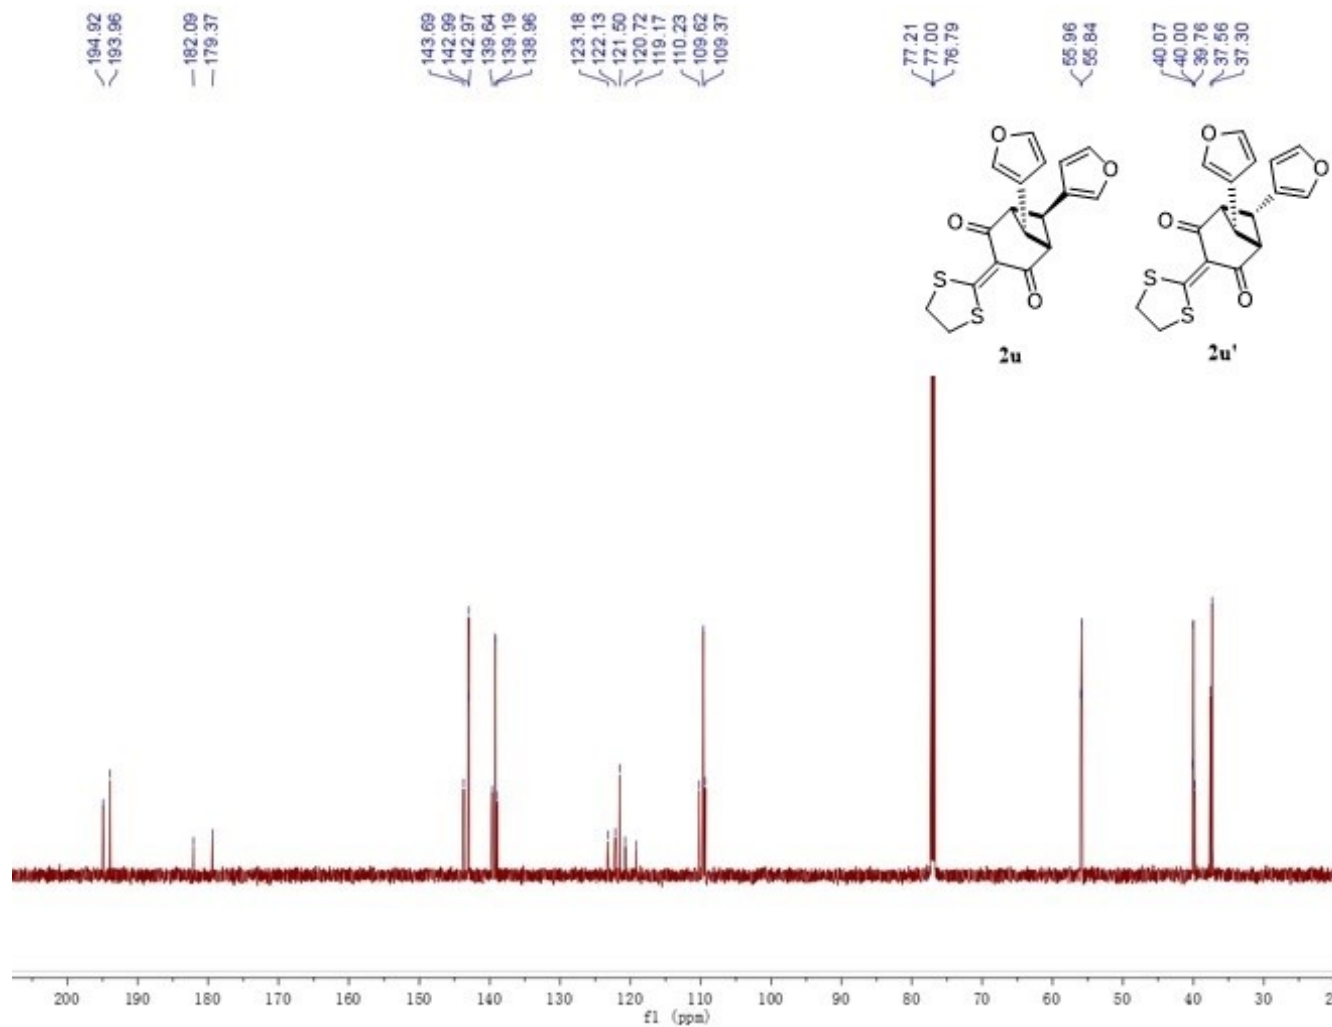

<sup>1</sup>H spectrum (600 MHz, CDCl<sub>3</sub>) of compound 3u

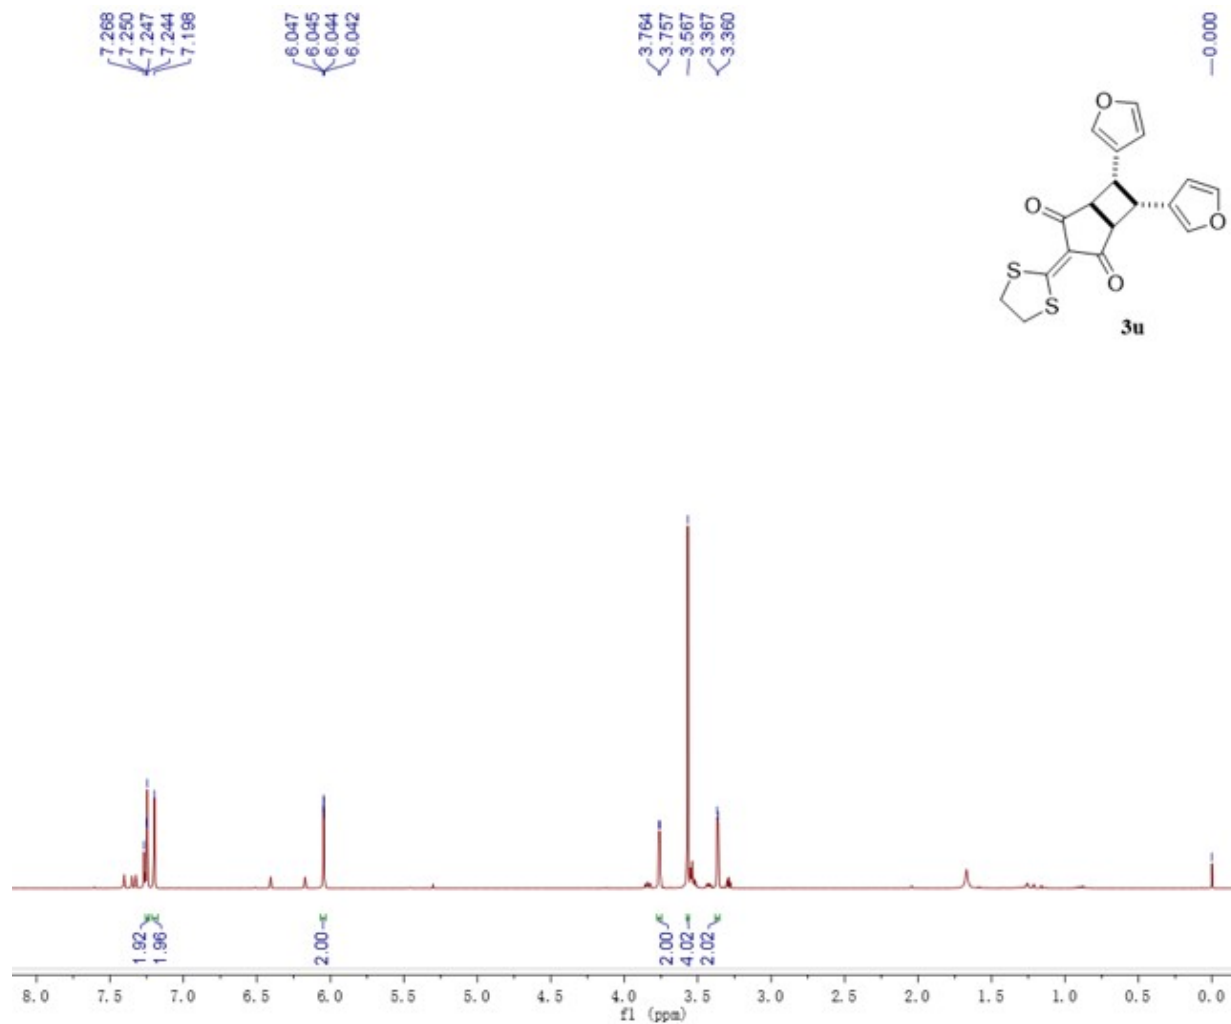

<sup>13</sup>C spectrum (151 MHz, CDCl<sub>3</sub>) of compound 3u

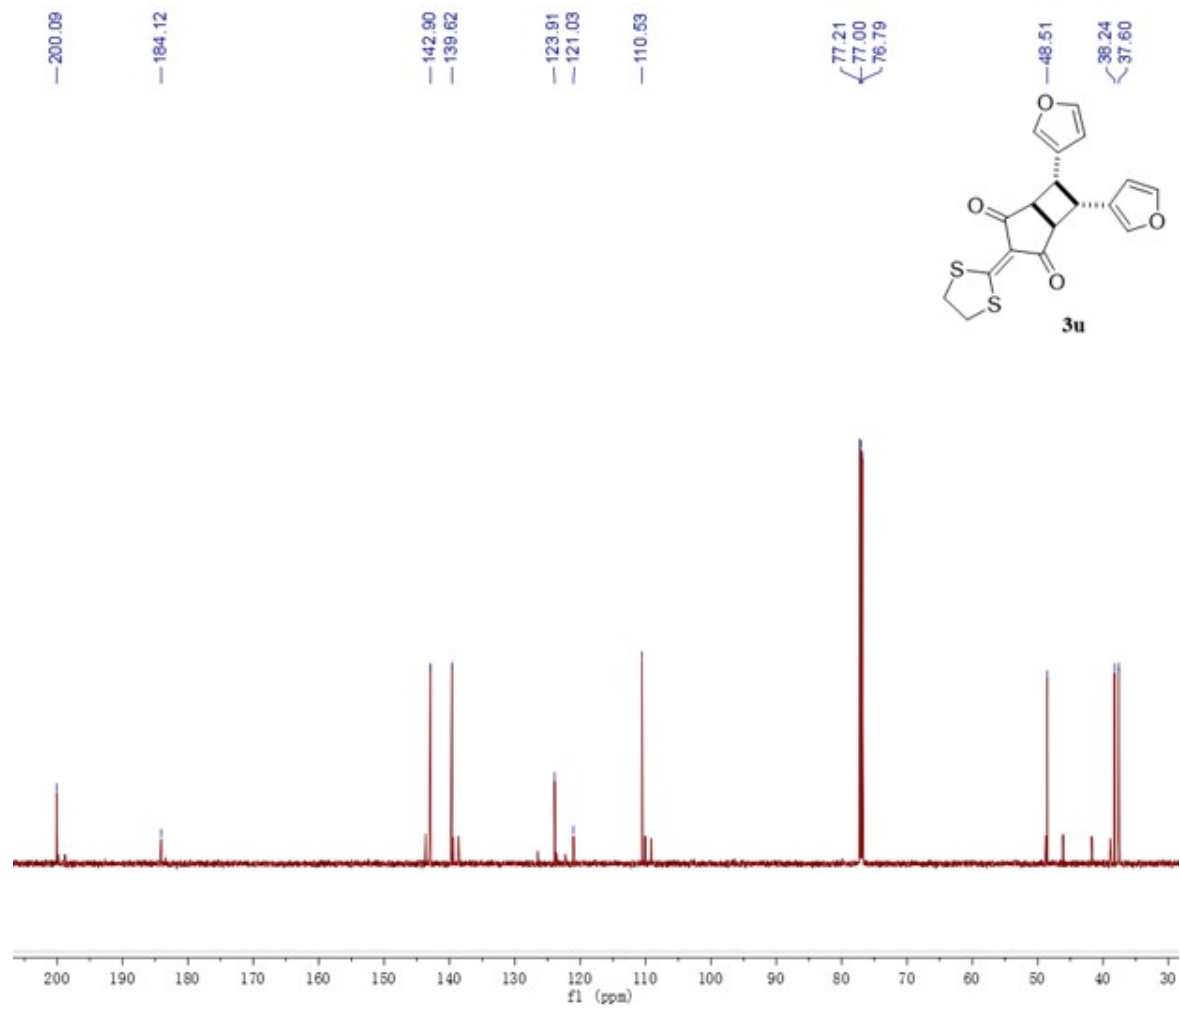

**<sup>1</sup>H spectrum (600 MHz, CDCl<sub>3</sub>) of compound 2v/2v'**

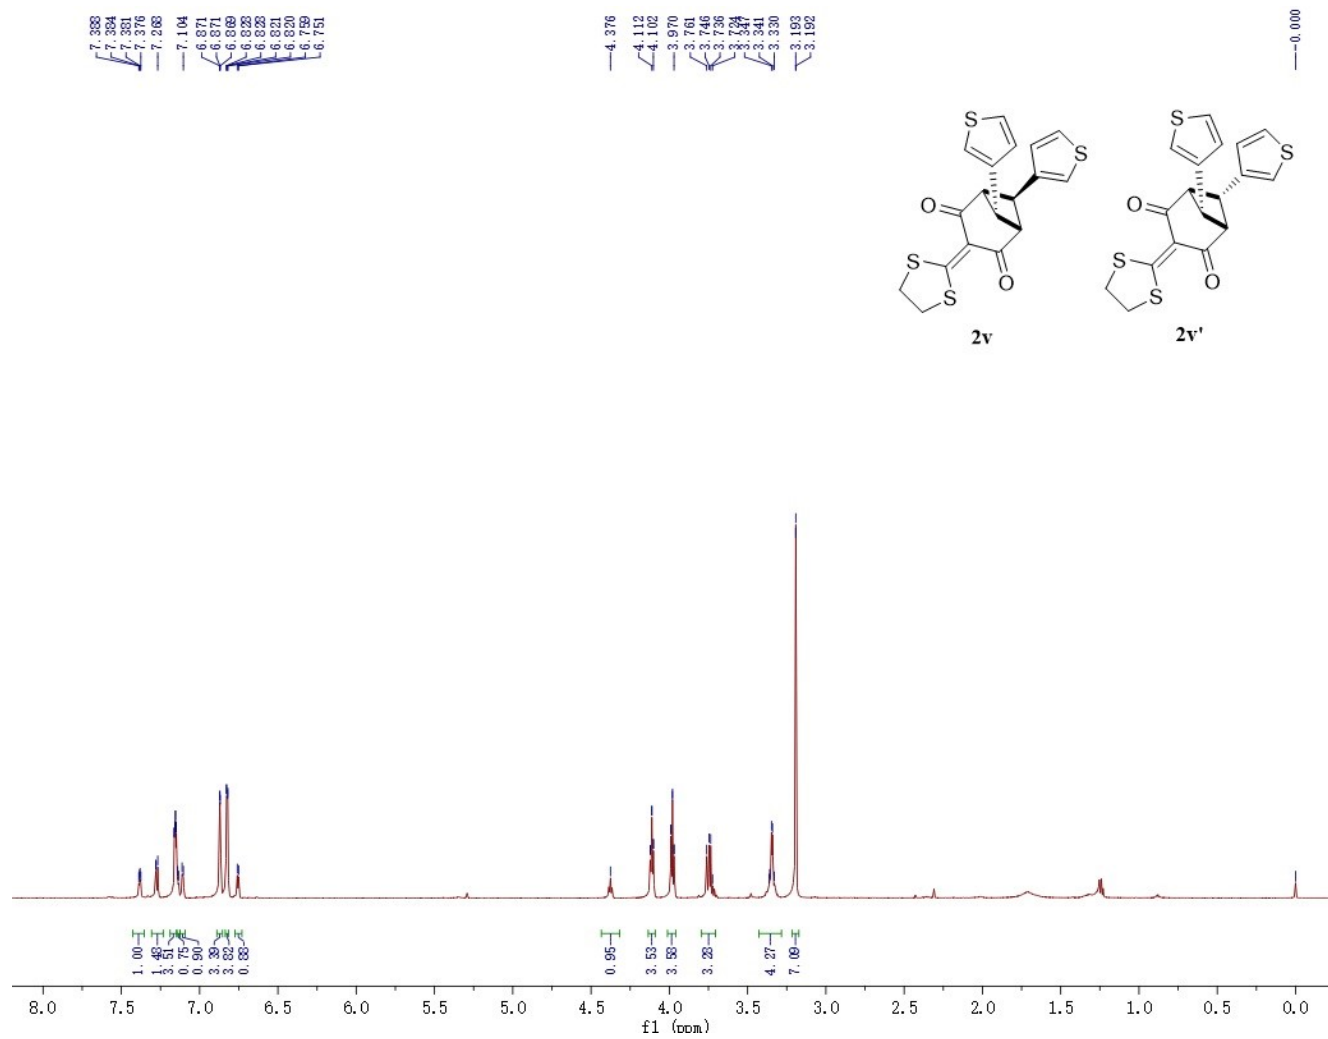

<sup>13</sup>C spectrum (151 MHz, CDCl<sub>3</sub>) of compound 2v/2v'

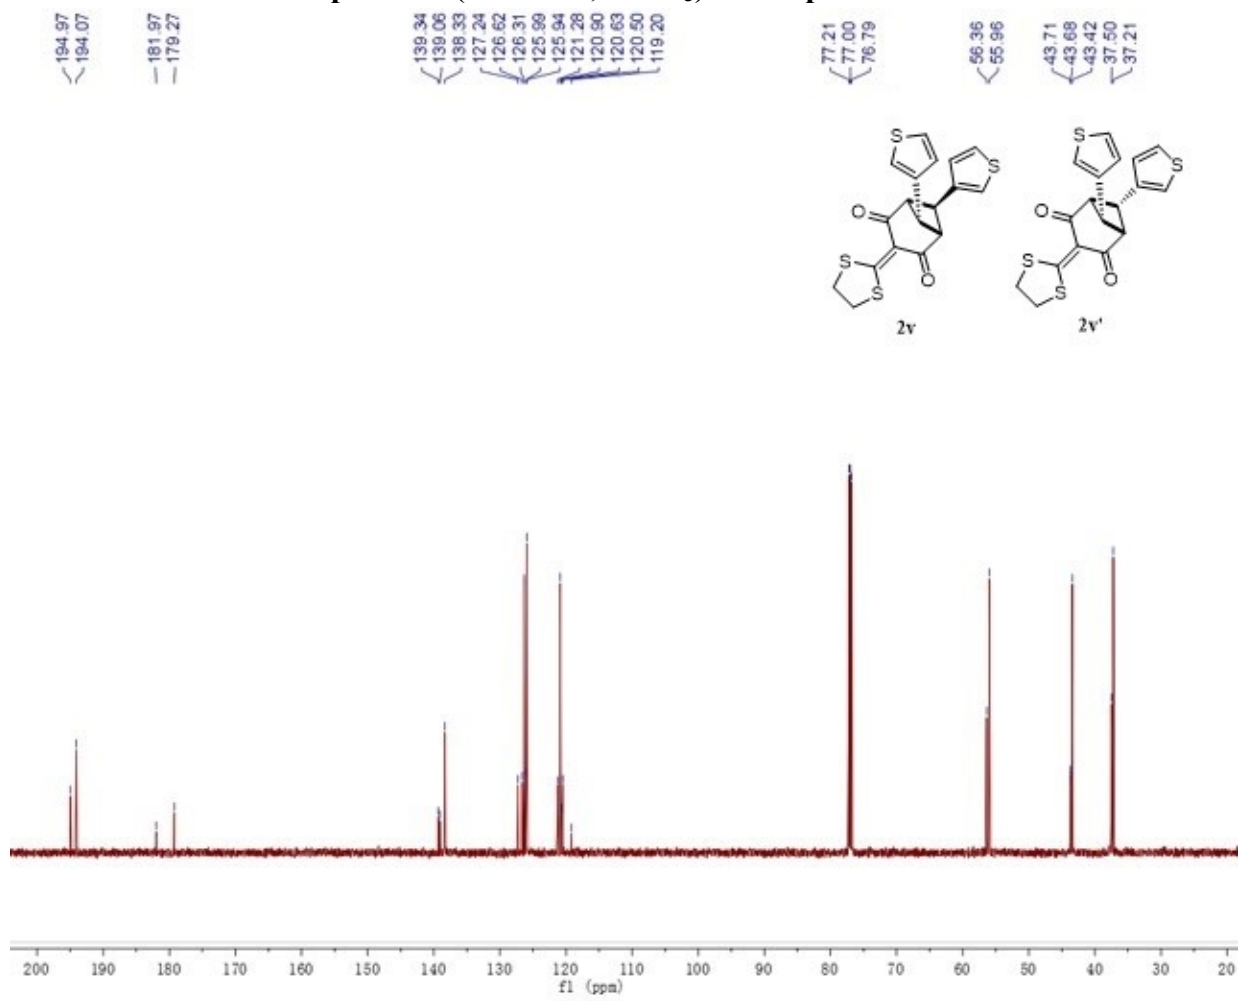

**<sup>1</sup>H spectrum (600 MHz, CDCl<sub>3</sub>) of compound 3v**

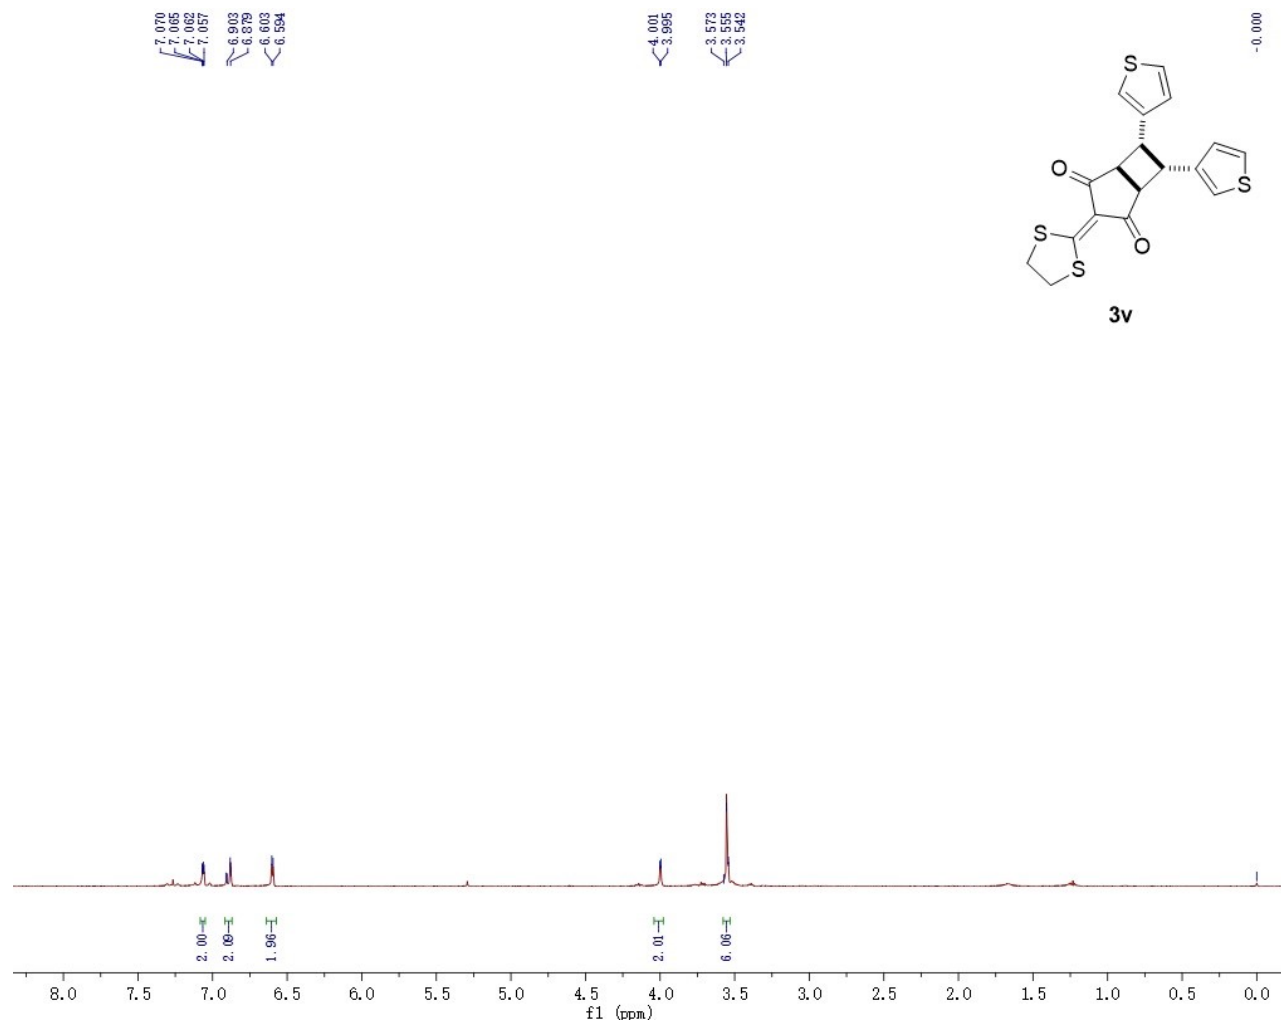

**<sup>13</sup>C spectrum (151 MHz, CDCl<sub>3</sub>) of compound 3v**

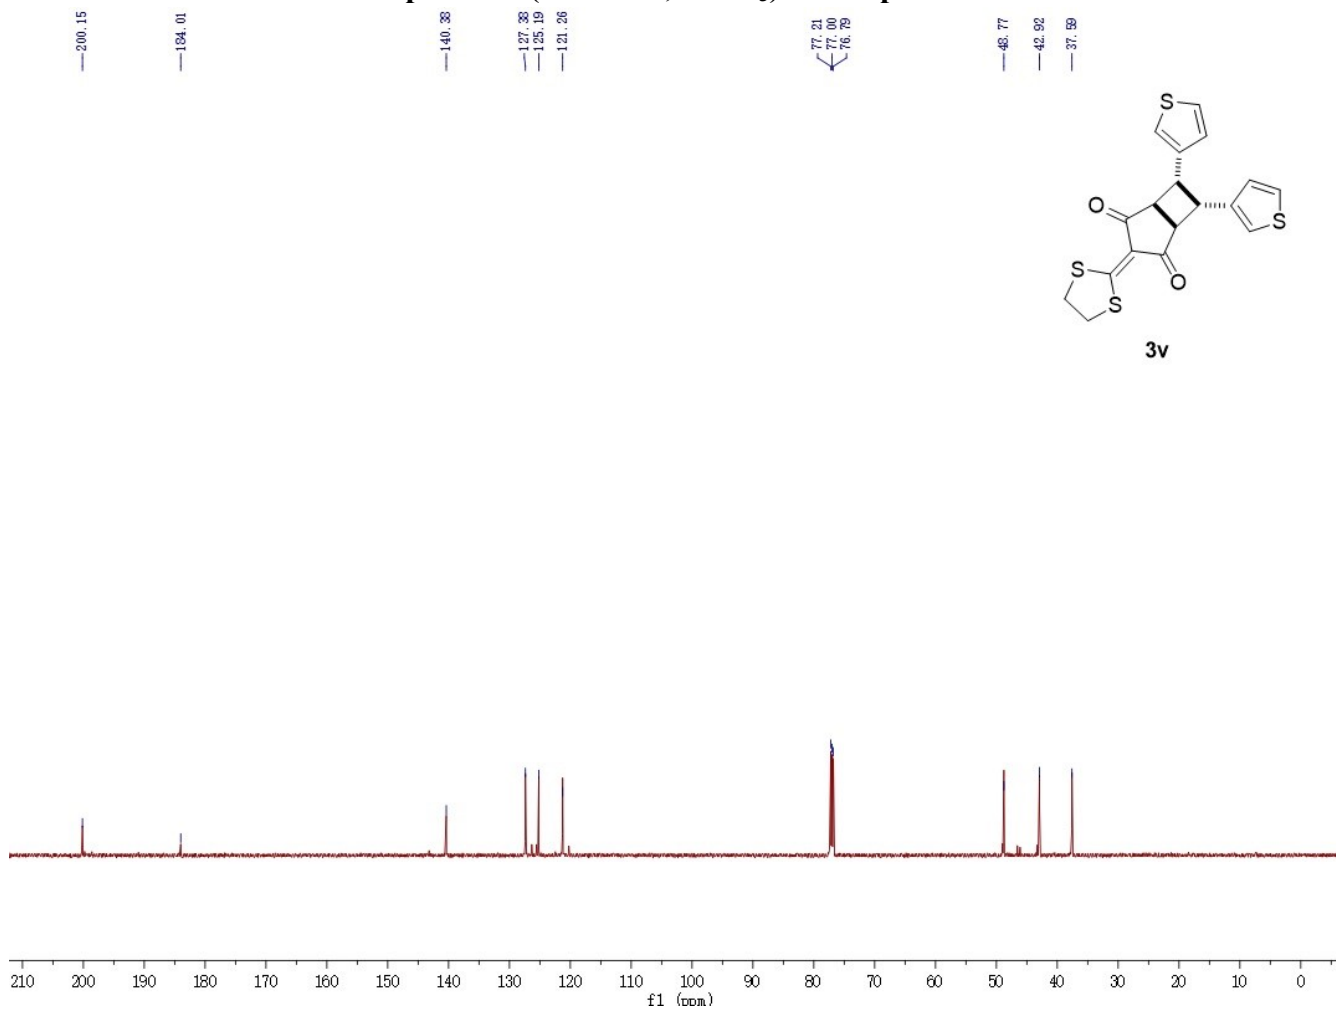



<sup>1</sup>H spectrum (500 MHz, CDCl<sub>3</sub>) of compound 2w/2w'

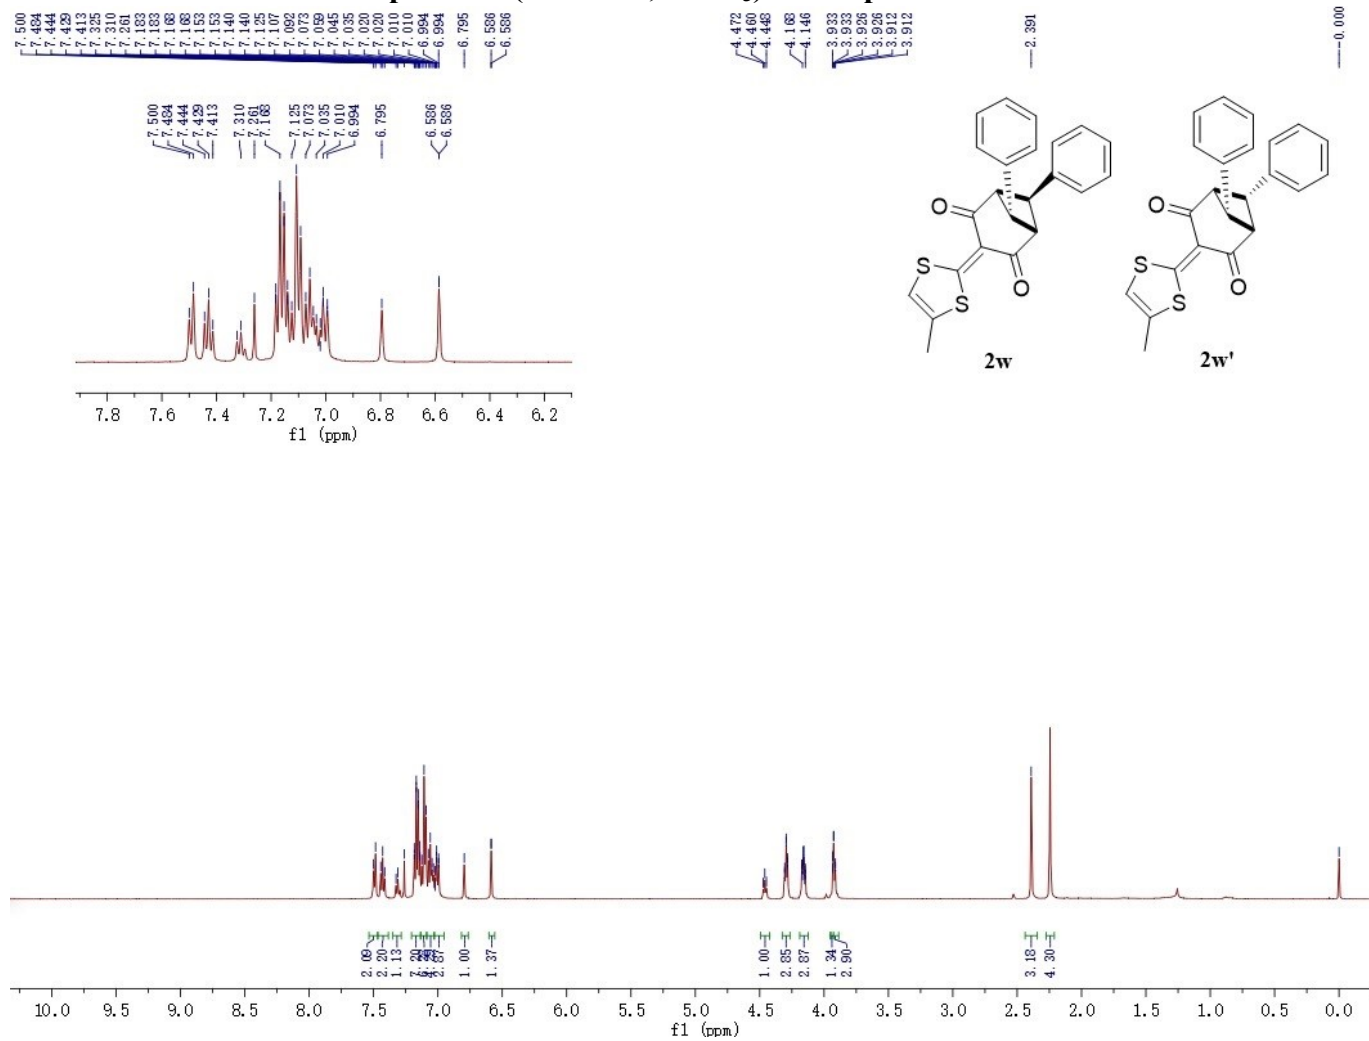

**$^{13}\text{C}$  spectrum (151 MHz,  $\text{CDCl}_3$ ) of compound 2w/2w'**

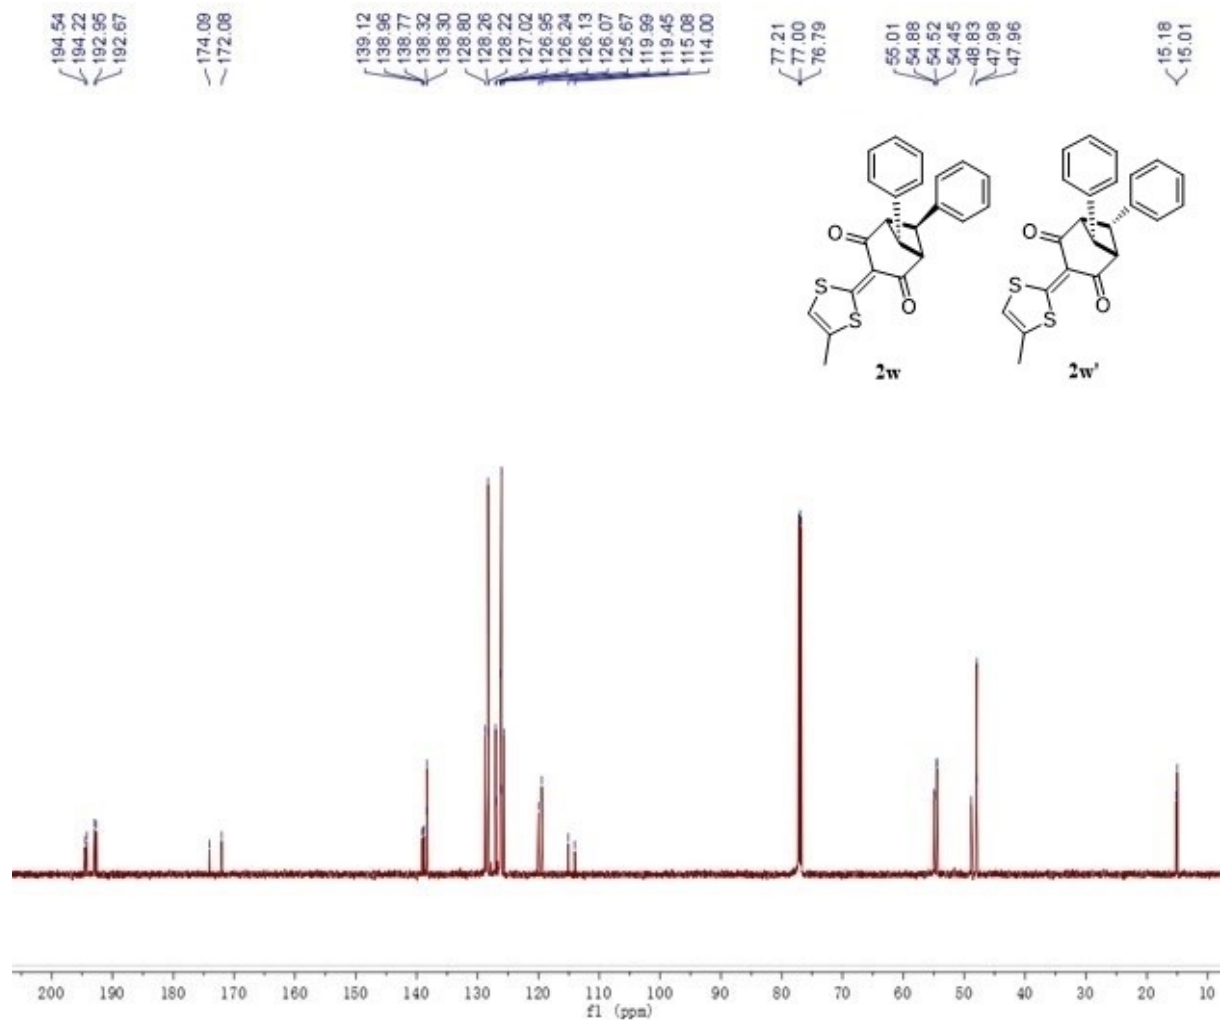

<sup>1</sup>H spectrum (600 MHz, CDCl<sub>3</sub>) of compound 3w

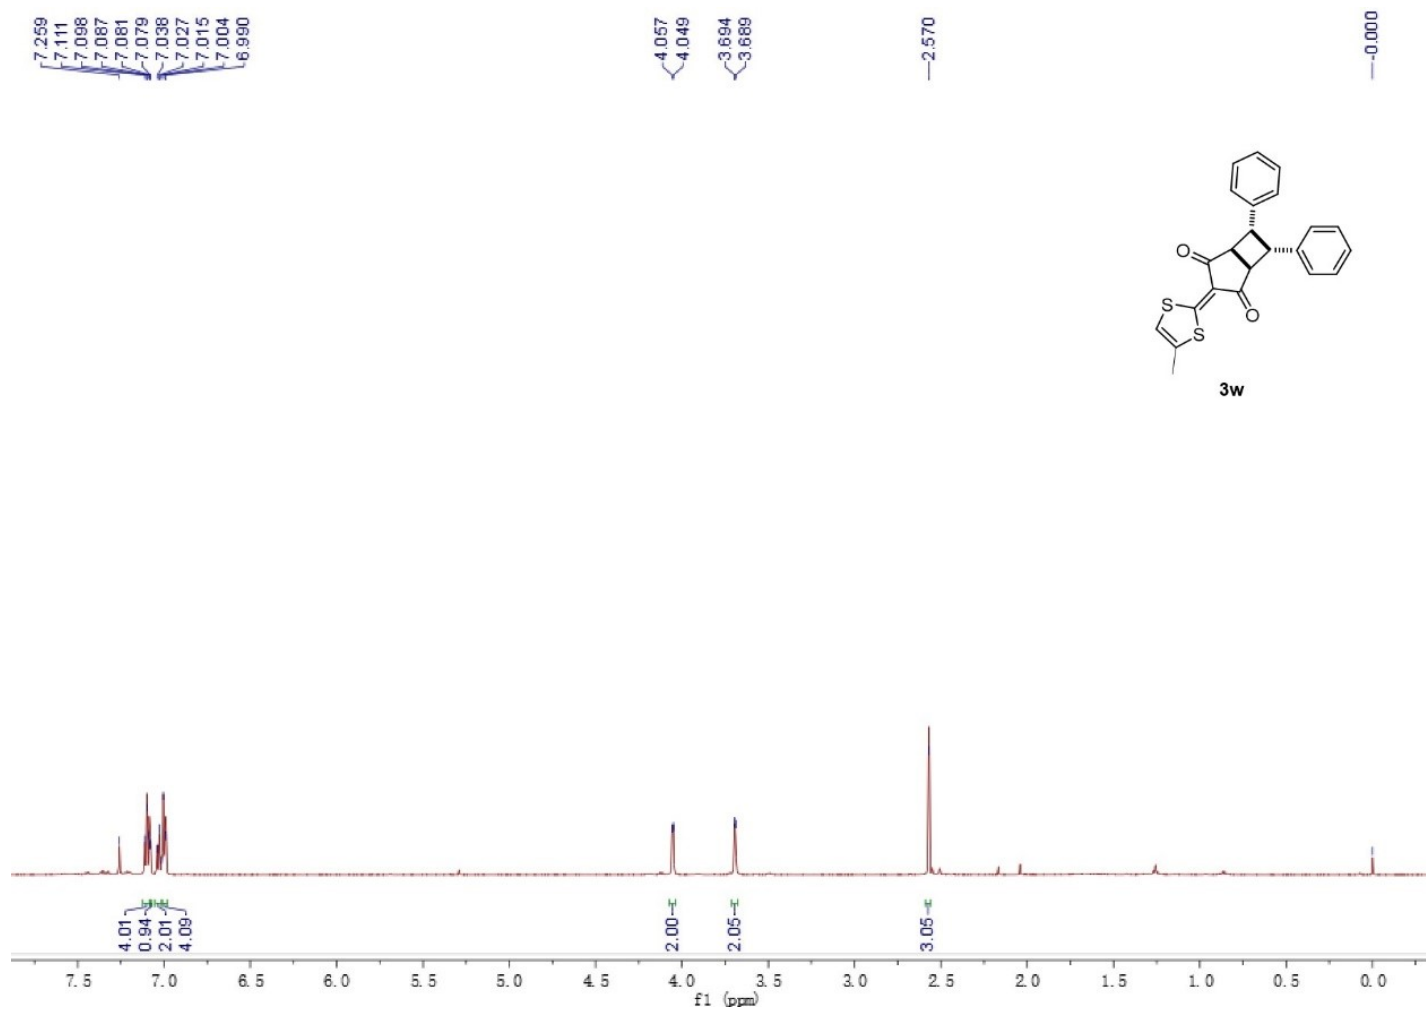

**<sup>13</sup>C spectrum (151 MHz, CDCl<sub>3</sub>) of compound 3w**

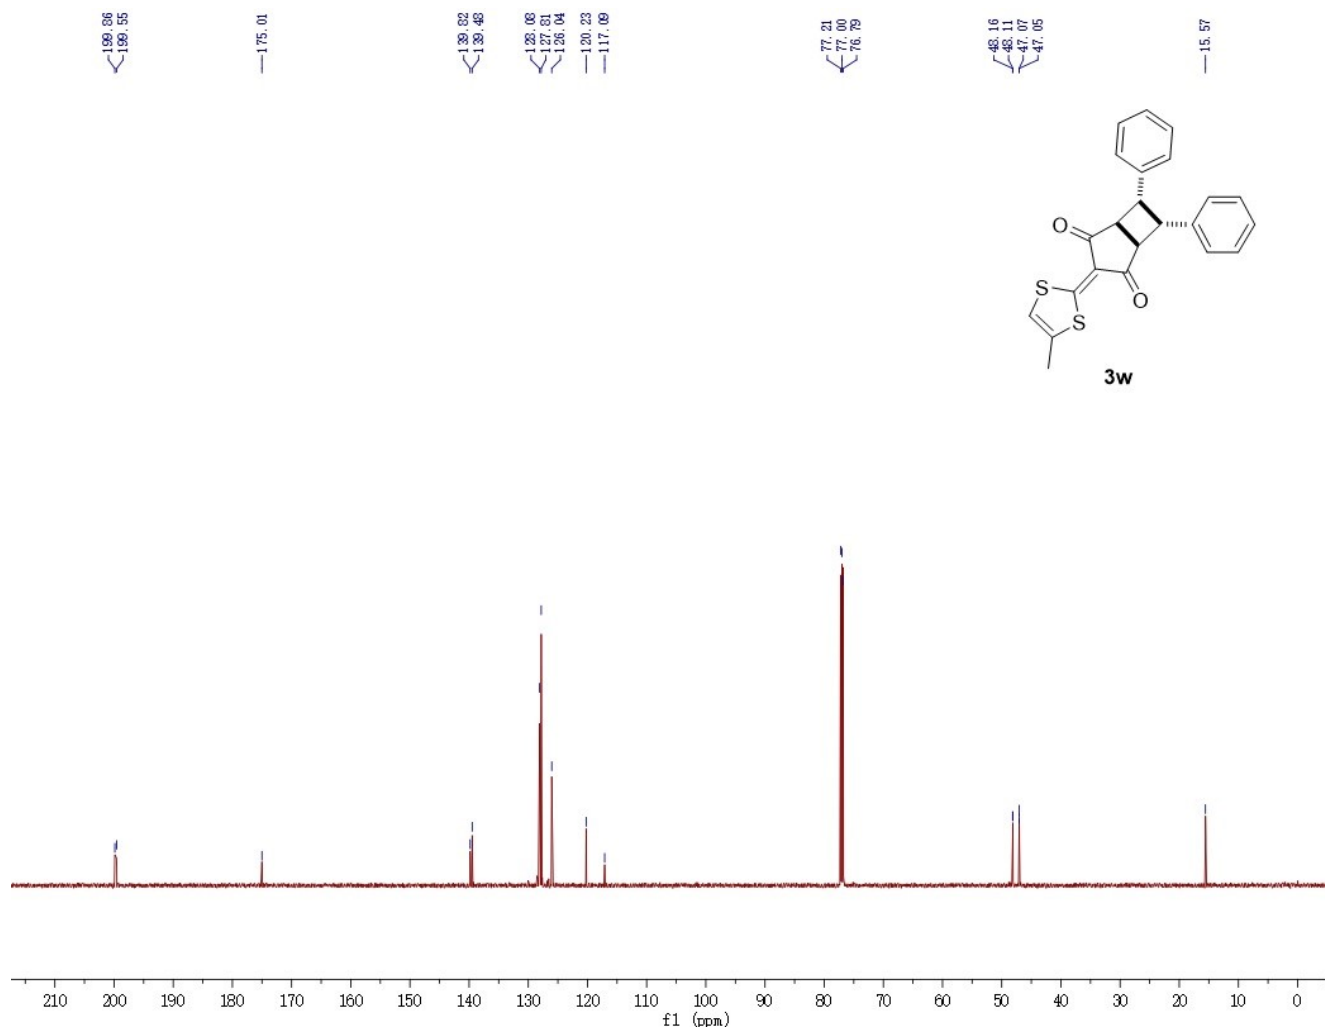

**<sup>1</sup>H spectrum (500 MHz, CDCl<sub>3</sub>) of compound 2x/2x'**

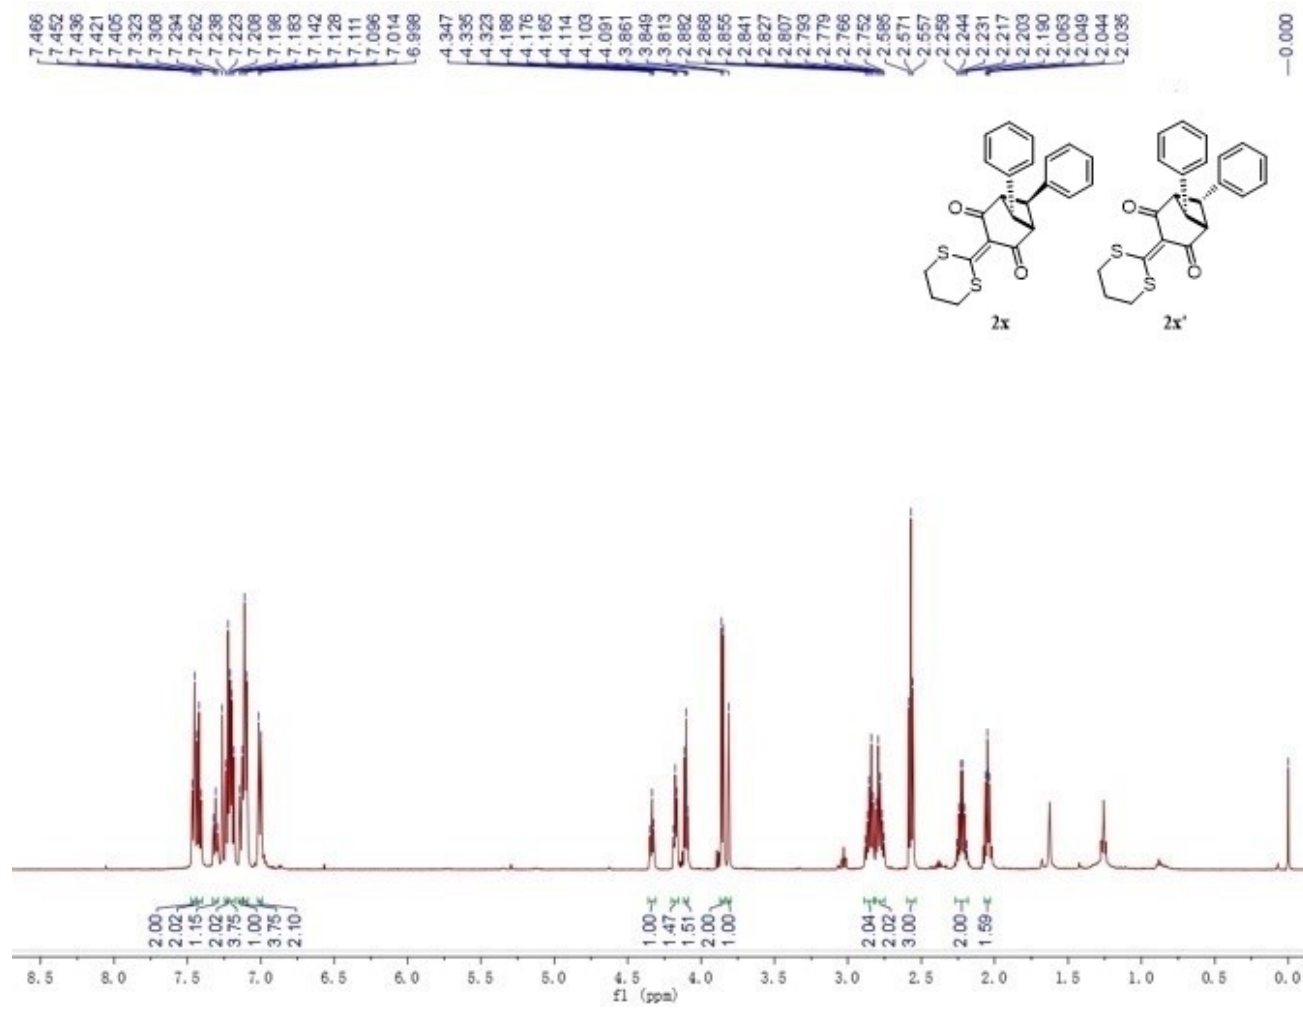

**$^{13}\text{C}$  spectrum (151 MHz,  $\text{CDCl}_3$ ) of compound 2x/2x'**

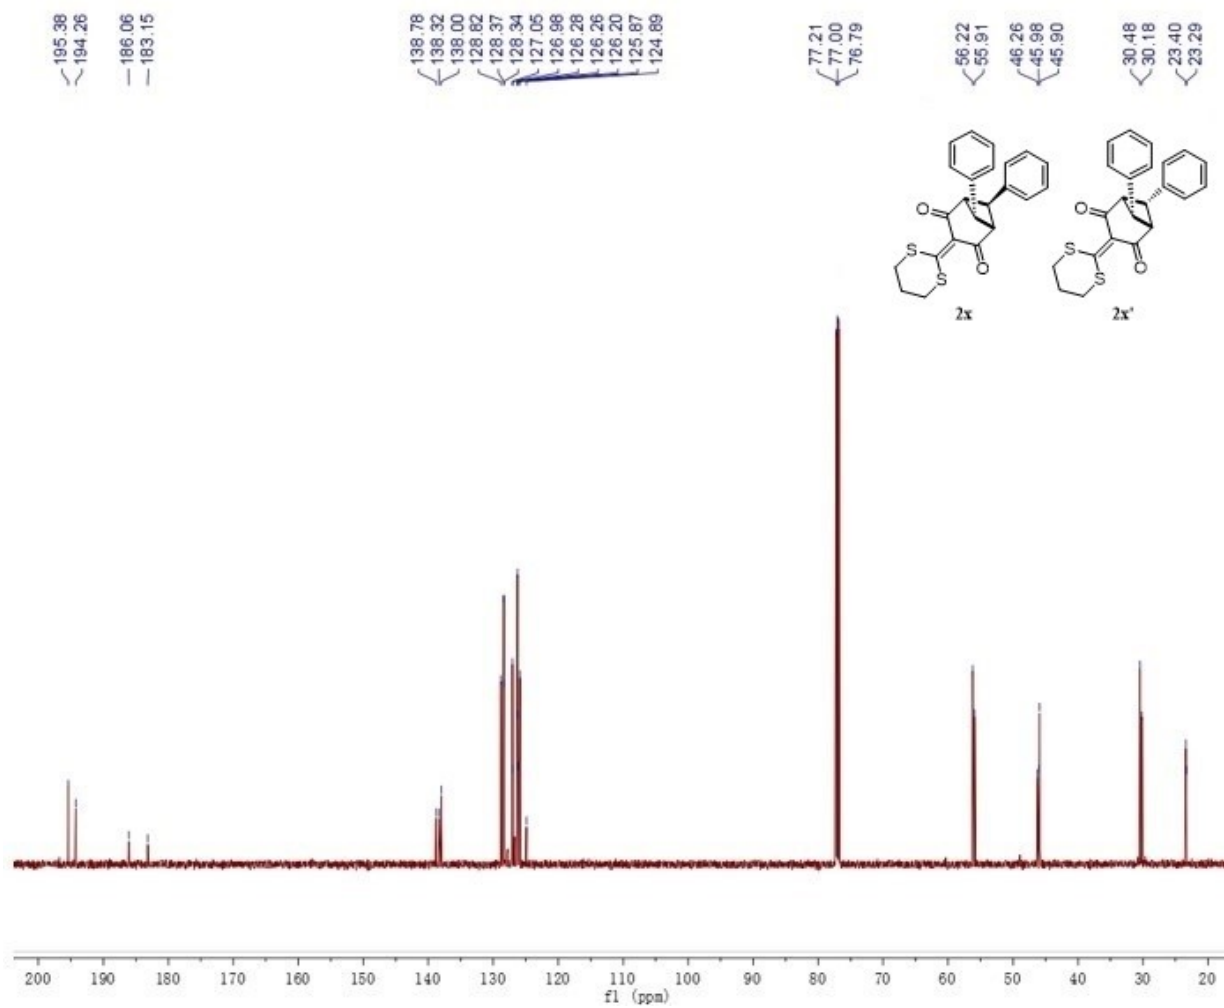

<sup>1</sup>H spectrum (500 MHz, CDCl<sub>3</sub>) of compound 2y/2y'

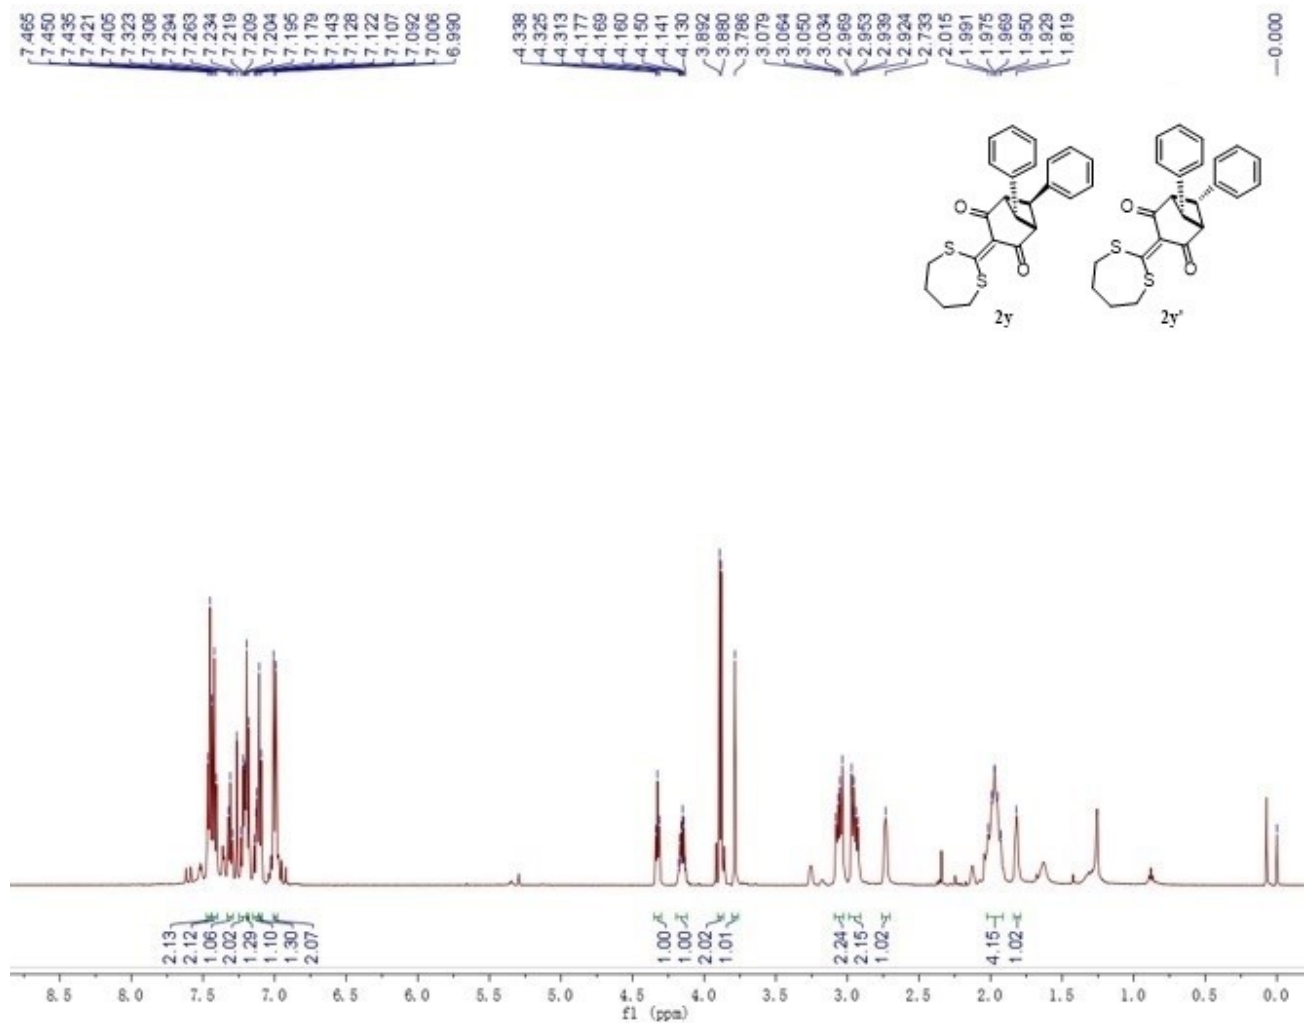

**$^{13}\text{C}$  spectrum (151 MHz,  $\text{CDCl}_3$ ) of compound 2y/2y'**

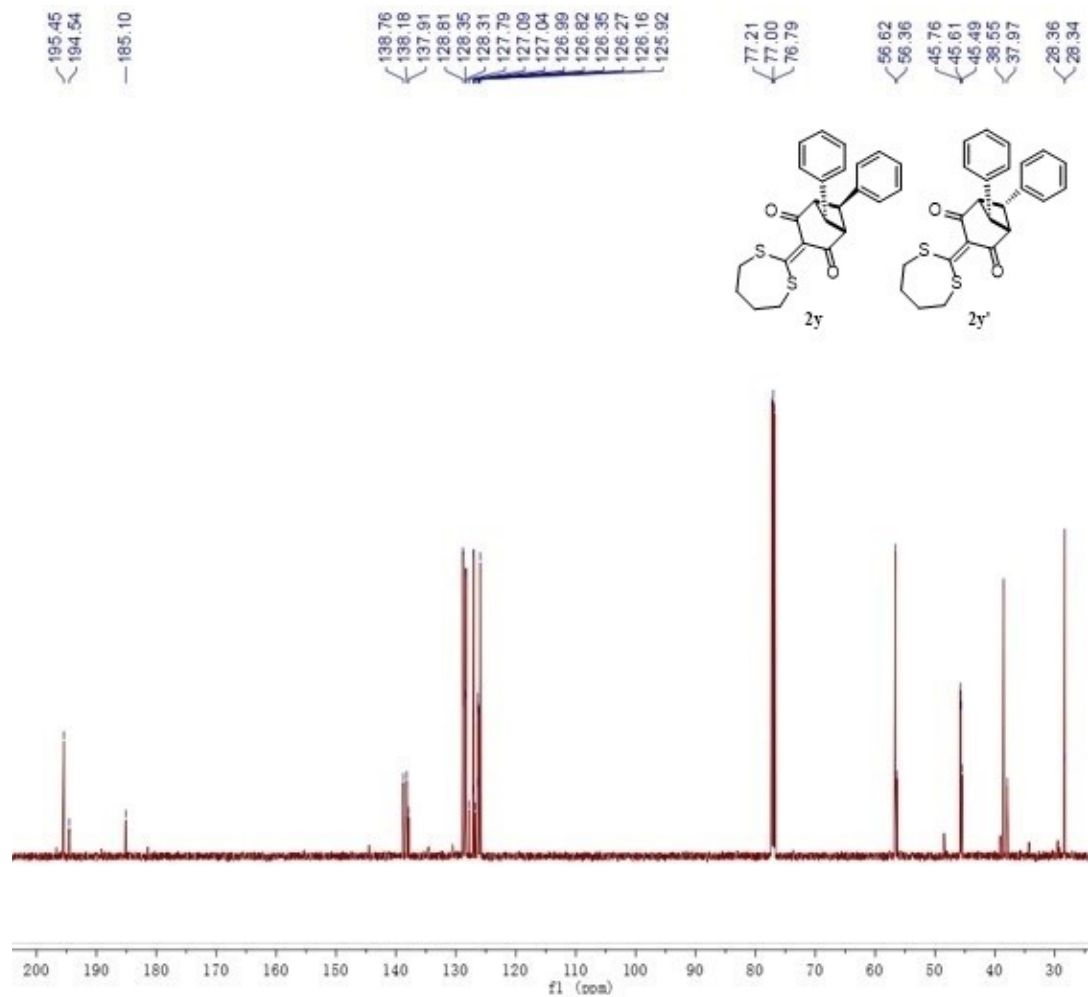



**<sup>1</sup>H spectrum (500 MHz, CDCl<sub>3</sub>) of compound 2aa/2ab/2aa'/2ab'**

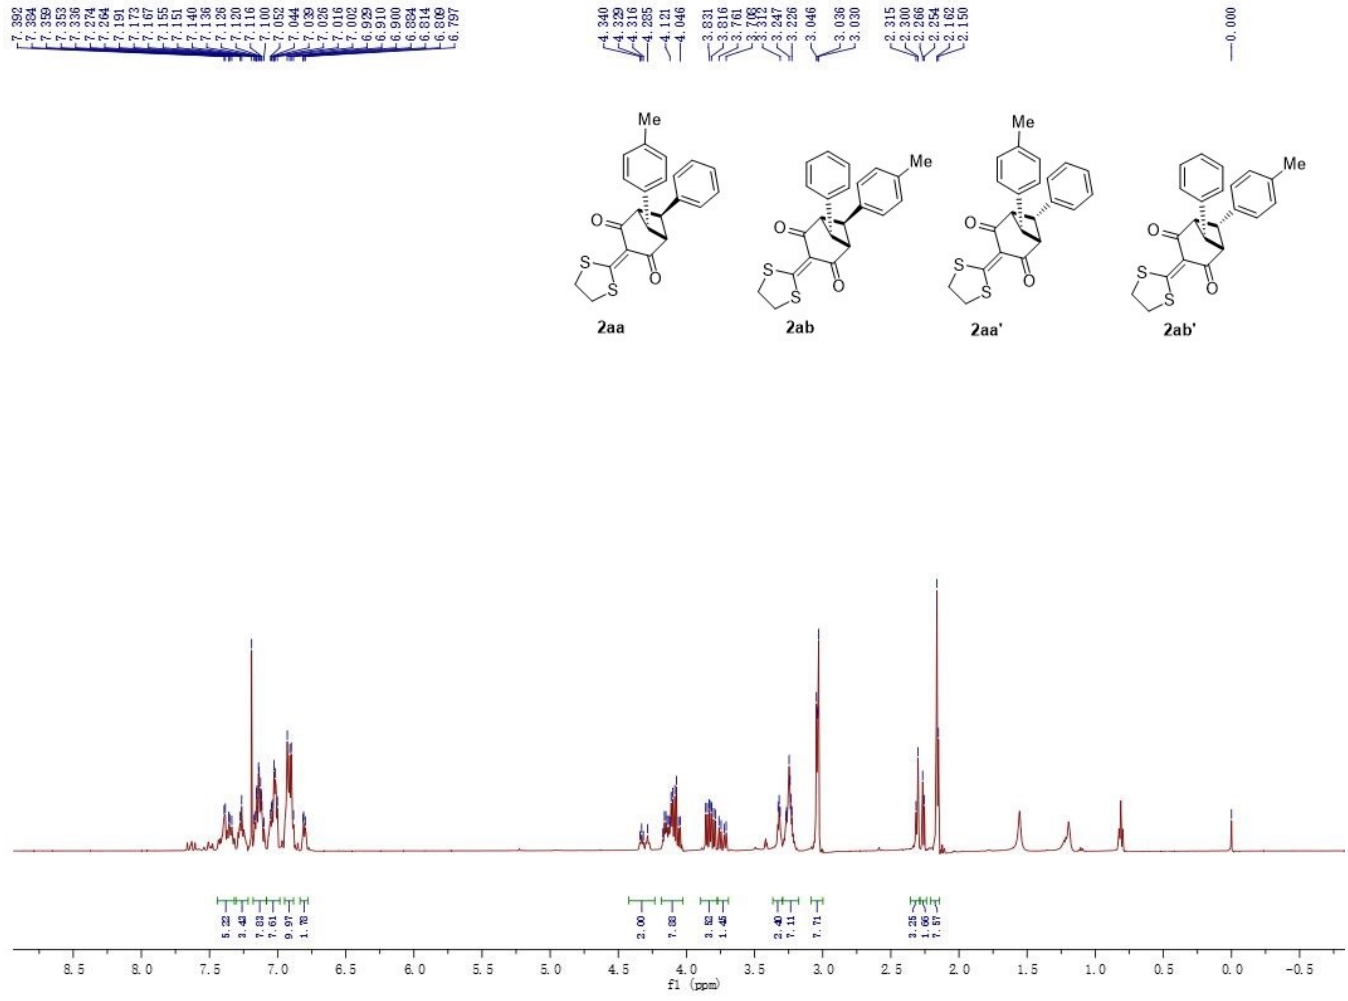

**<sup>13</sup>C spectrum (151 MHz, CDCl<sub>3</sub>) of compound 2aa/2ab/2aa'/2ab'**

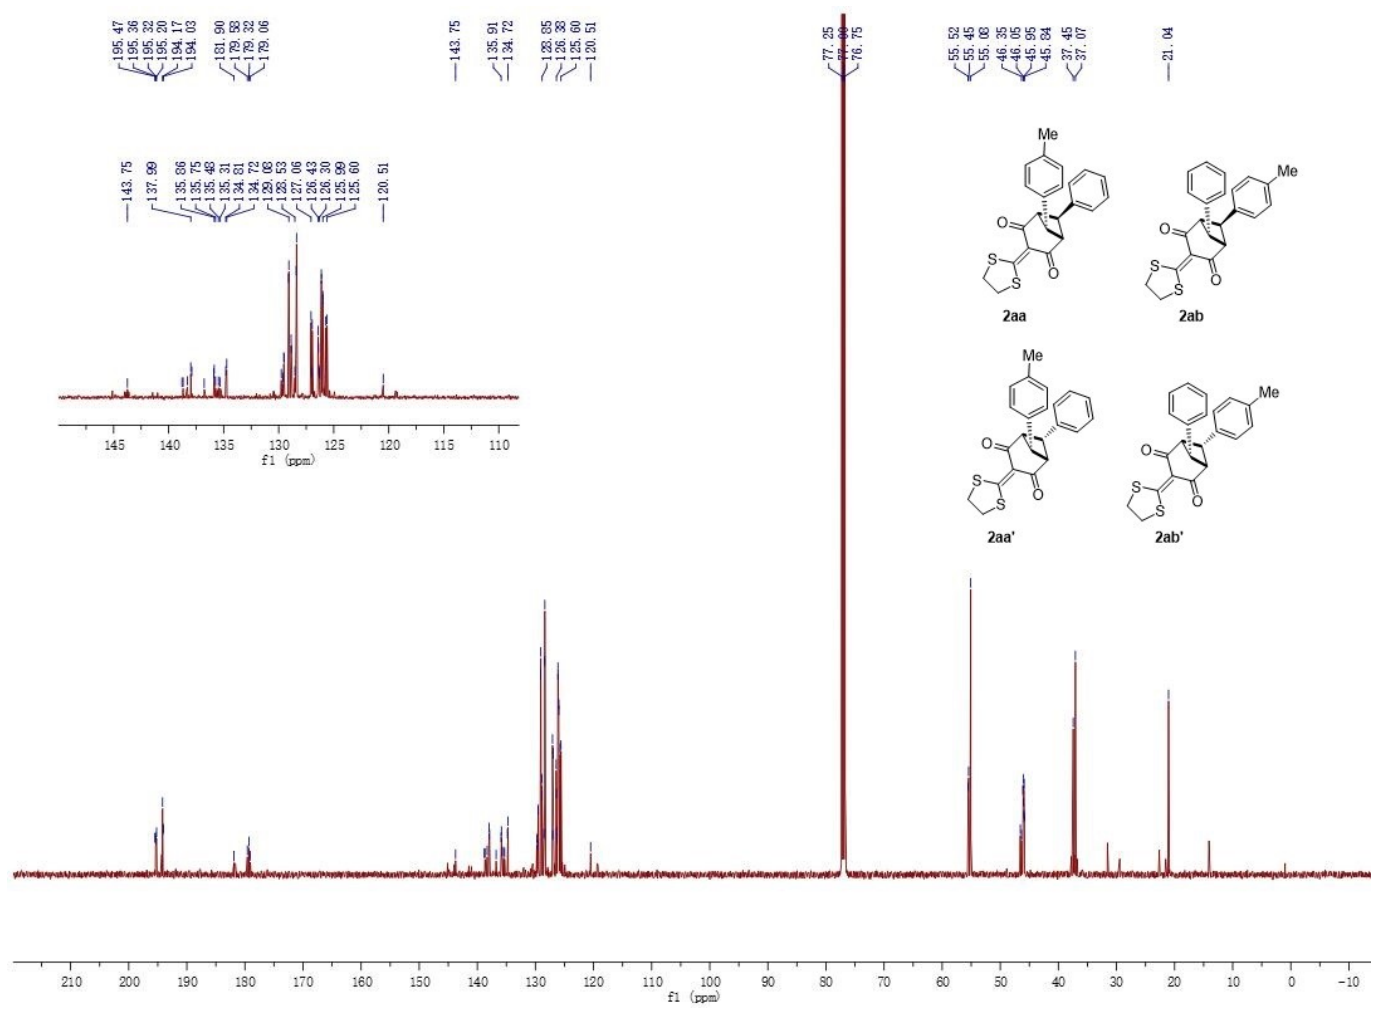

**<sup>1</sup>H spectrum (500 MHz, CDCl<sub>3</sub>) of compound 3aa/3ab**

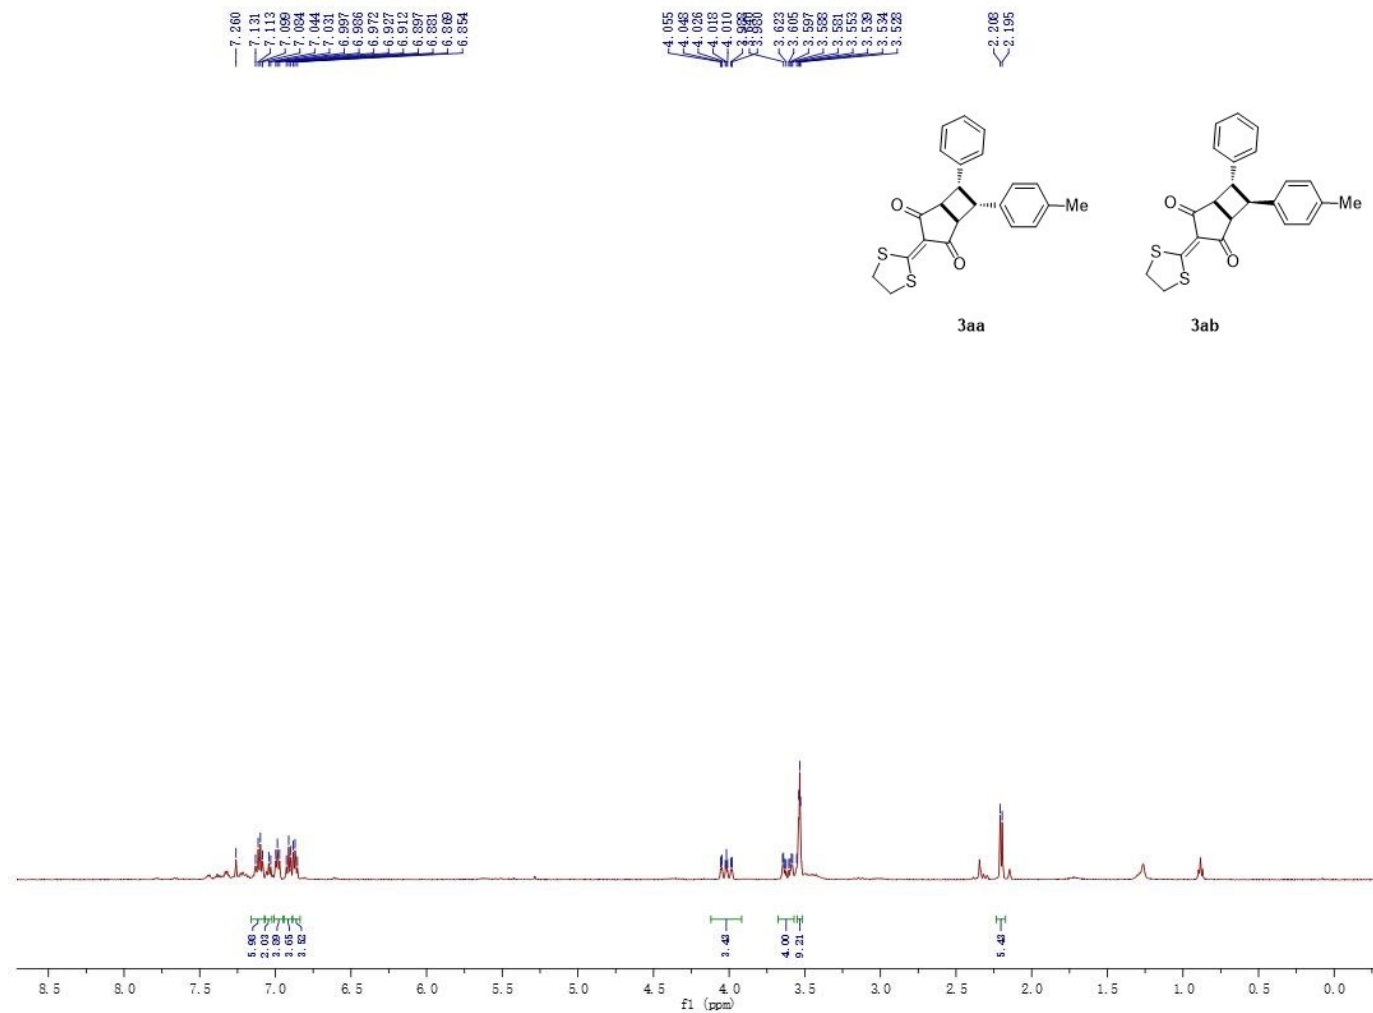

**$^{13}\text{C}$  spectrum (151 MHz,  $\text{CDCl}_3$ ) of compound 3aa/3ab**

200.70  
200.64  
200.61  
200.55

183.91  
183.73  
183.54

133.29  
133.13  
136.12  
135.58  
137.83  
136.07  
121.34  
121.30  
121.27

77.21  
77.00  
76.79

48.88  
48.30  
48.06  
47.97  
47.19  
47.16  
46.91  
46.88  
37.56  
37.55  
37.53

22.83  
22.82  
20.90

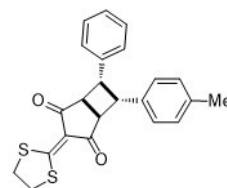

**3aa**

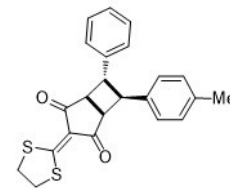

**3ab**

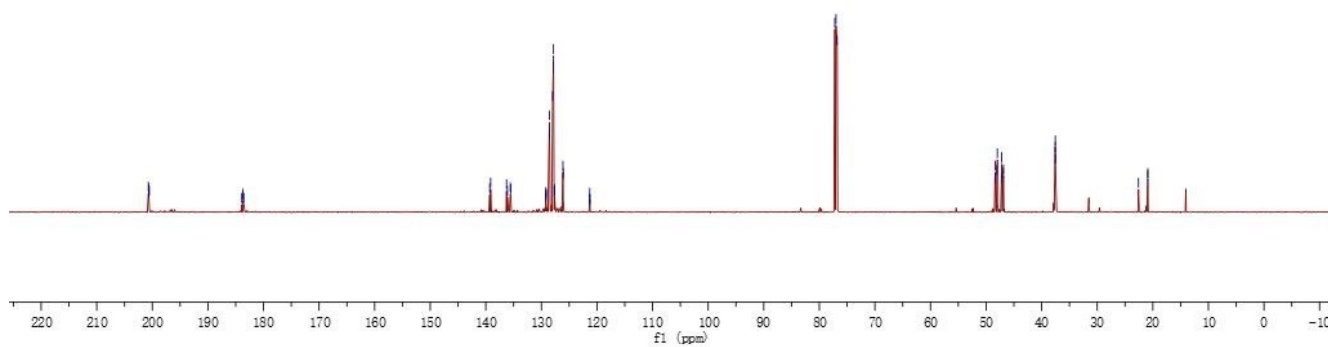

**<sup>1</sup>H spectrum (500 MHz, CDCl<sub>3</sub>) of compound 2ac/2ad/2ac'/2ad'**

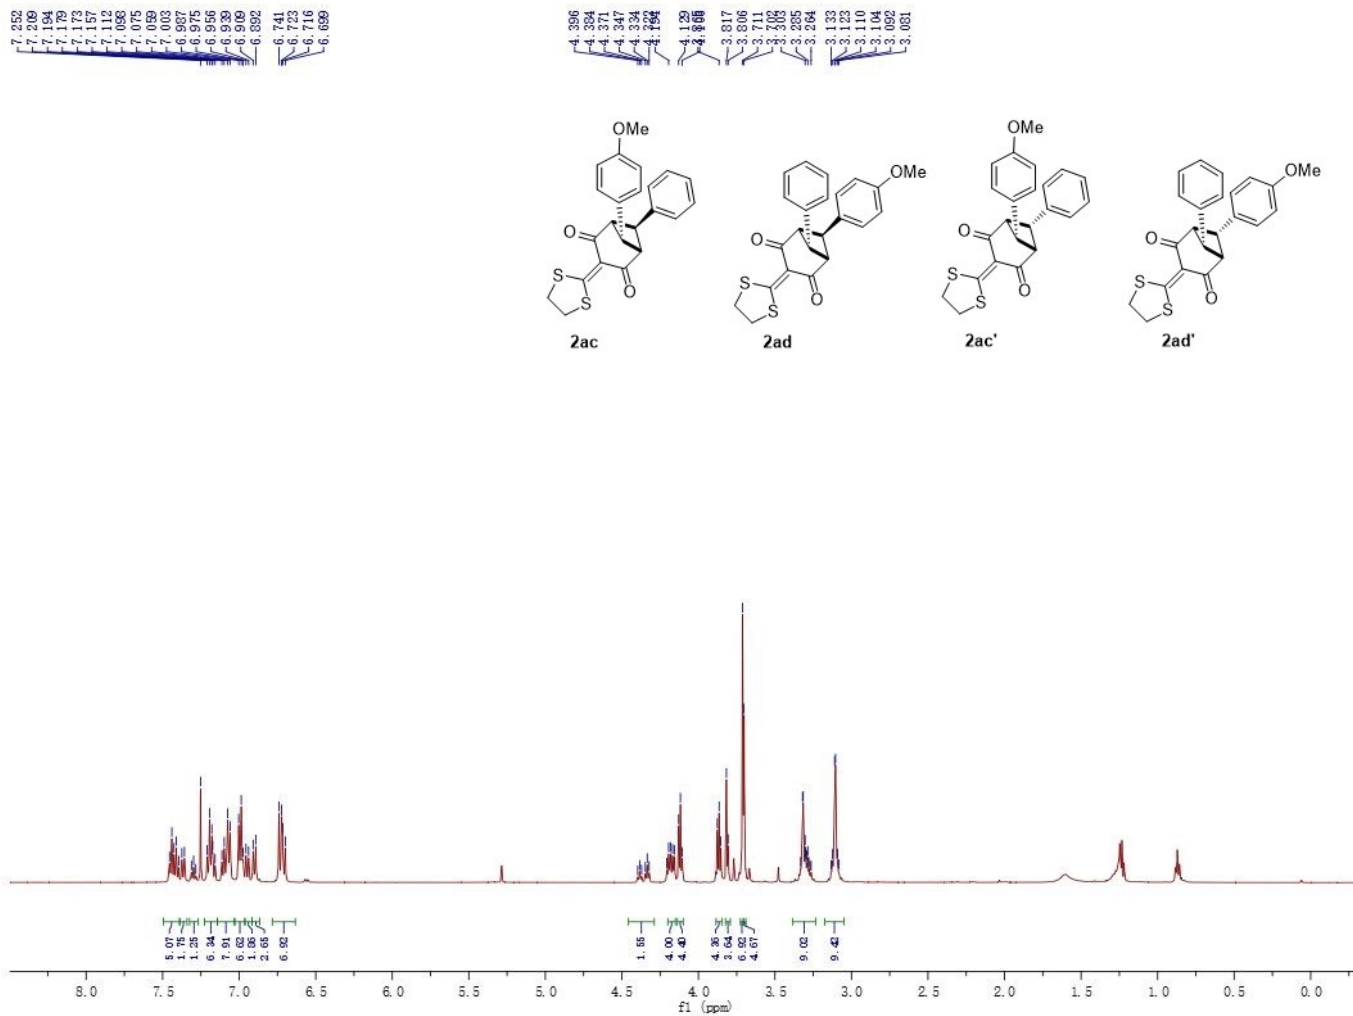

**$^{13}\text{C}$  spectrum (151 MHz,  $\text{CDCl}_3$ ) of compound 2ac/2ad/2ac'/2ad'**

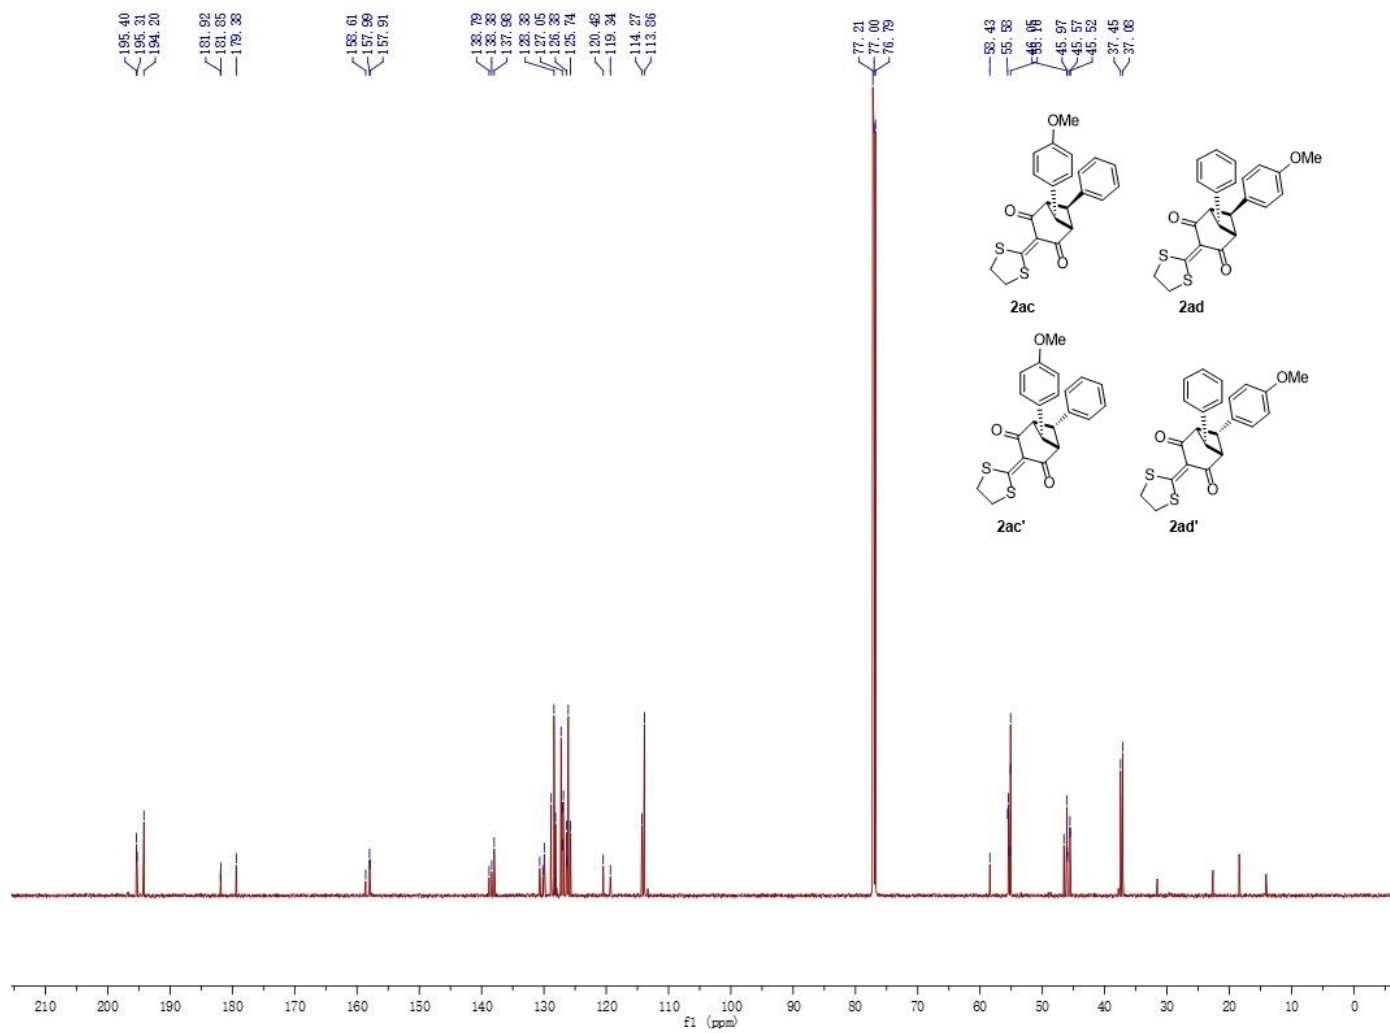

<sup>1</sup>H spectrum (500 MHz, CDCl<sub>3</sub>) of compound 3ac

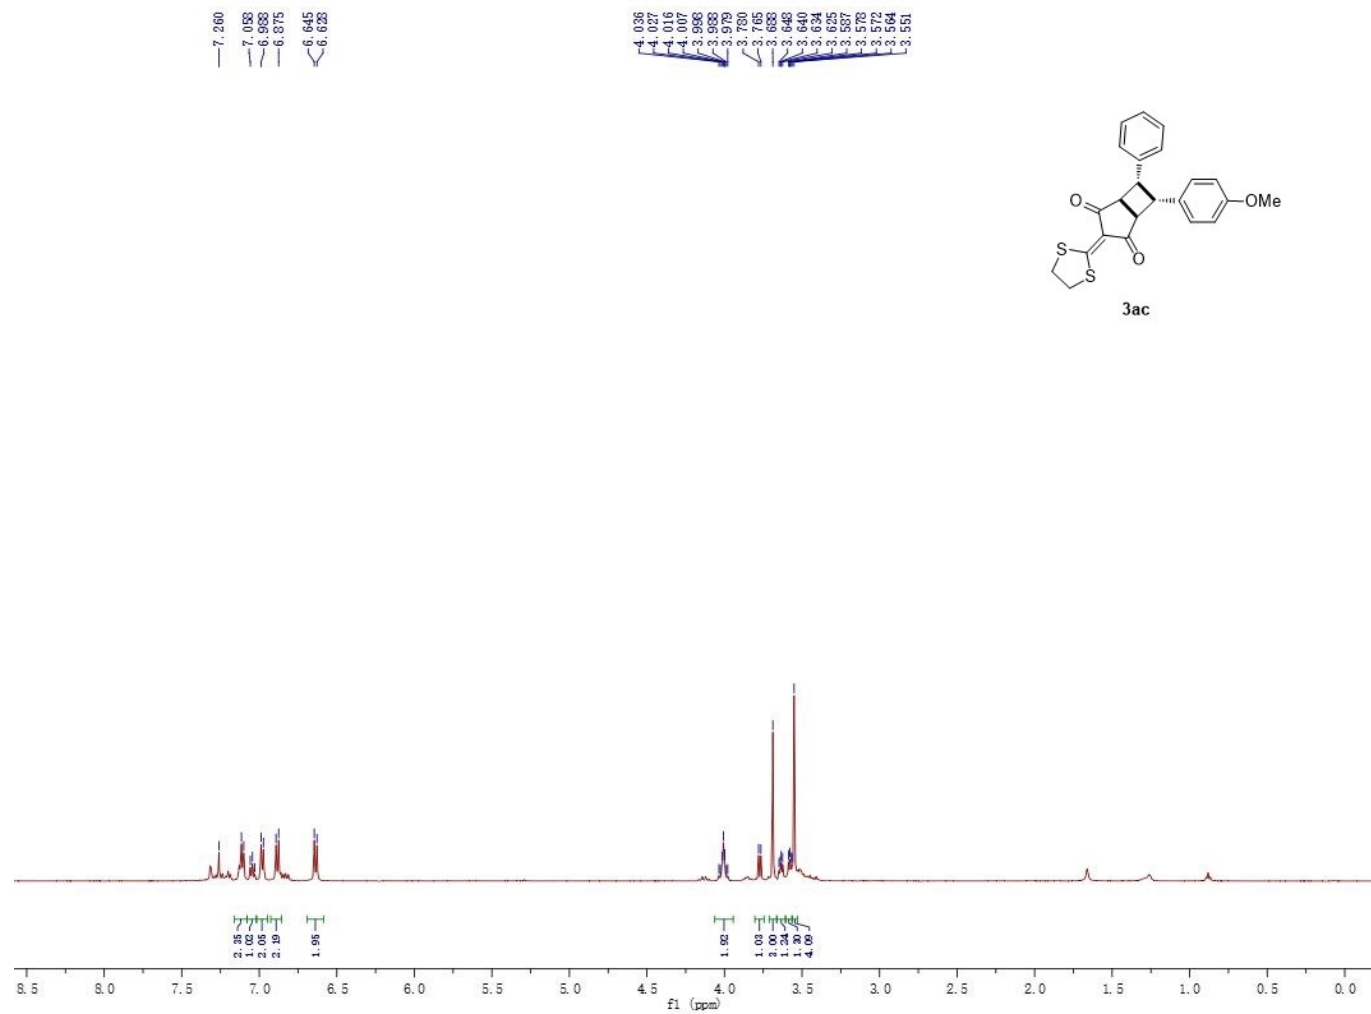

**$^{13}\text{C}$  spectrum (151 MHz,  $\text{CDCl}_3$ ) of compound **3ac****

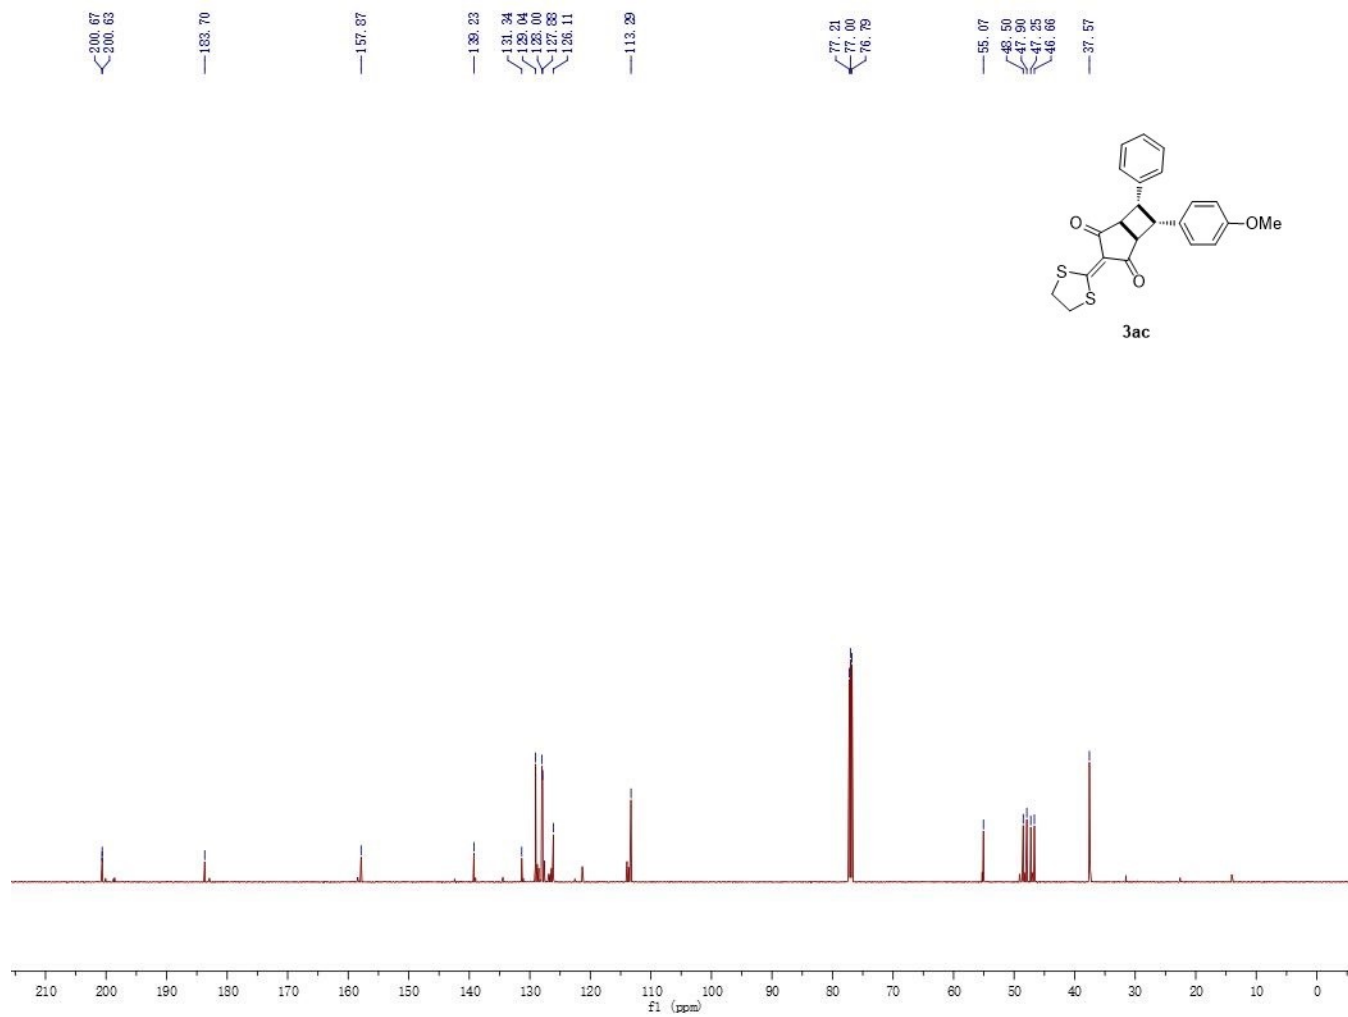



## 9. References

- [1] Y. Ouyang, D. Dong, W. Pan, J. Zhang and Q. Liu. Facile and clean synthesis of  $\alpha$ -alkenoyl ketene-(*S,S*)-acetals via the aldol condensation reactions in water. *Tetrahedron*, 2006, **62**, 10111–10116.
- [2] F. Liang, J. Zhang, J. Tan and Q. Liu. Domino Reaction of Acyclic  $\alpha, \alpha$ -Dialkenoylketene (*S,S*)-Acetals and Diamines: Efficient Synthesis of Tetracyclic Thieno[2,3-*b*]thiopyran Fused Imidazo[1,2-*a*]pyridine/pyrido[1,2-*a*]pyrimidines. *Adv. Synth. Catal*, 2006, **348**, 1986–1990.
- [3] M. J. Frisch, G. W. Trucks, H. B. Schlegel, G. E. Scuseria, M. A. Robb, J. R. Cheeseman, G. Scalmani, V. Barone, B. Mennucci, G. A. Petersson, H. Nakatsuji, M. Caricato, X. Li, H. P. Hratchian, A. F. Izmaylov, J. Bloino, G. Zheng, J. L. Sonnenberg, M. Hada, M. Ehara, K. Toyota, R. Fukuda, J. Hasegawa, M. Ishida, T. Nakajima, Y. Honda, O. Kitao, H. Nakai, T. Vreven, J. A. Montgomery, Jr., J. E. Peralta, F. Ogliaro, M. Bearpark, J. J. Heyd, E. Brothers, K. N. Kudin, V. N. Staroverov, T. Keith, R. Kobayashi, J. Normand, K. Raghavachari, A. Rendell, J. C. Burant, S. S. Iyengar, J. Tomasi, M. Cossi, N. Rega, J. M. Millam, M. Klene, J. E. Knox, J. B. Cross, V. Bakken, C. Adamo, J. Jaramillo, R. Gomperts, R. E. Stratmann, O. Yazyev, A. J. Austin, R. Cammi, C. Pomelli, J. W. Ochterski, R. L. Martin, K. Morokuma, V. G. Zakrzewski, G. A. Voth, P. Salvador, J. J. Dannenberg, S. Dapprich, A. D. Daniels, O. Farkas, J. B. Foresman, J. V. Ortiz, J. Cioslowski, and D. J. Fox, Gaussian 09 (Revision D.01), Gaussian, Inc., Wallingford CT, 2013.
- [4] (a) Michlich B, Savin A, Stoll H, et al. Results obtained with the correlation energy density functionals of Becke and Lee, Yang and Parr. *Chem. Phys. Lett.*, 1989, **157**, 200–206; (b) Becke A D. Density-functional thermochemistry. I. The effect of the exchange-only gradient correction. *J. Chem. Phys.*, 1992, **96**, 2155–2160.
- [5] Harvey, J. N.; Aschi, M.; Schwarz, H.; Koch, W. The Singlet and Triplet States of Phenyl Cation. A Hybrid Approach for Locating Minimum Energy Crossing Points between Non-interacting Potential Energy Surfaces. *Theor. Chem. Acc.* 1998, **99**, 95–99.
- [6] T. Lu, sobMECP program, <http://sobereva.com/286>.
